# Supplementary material
Source: publisher figshare collection journal article supplement (https://acs.figshare.com/ndownloader/files/31573158)

## Supporting Information

### Exploring the Structure and Performance of Cd-Chalcogenide Photocatalysts in Selective Trifluoromethylations

Krishnamoorthy Muralirajan,<sup>‡a</sup> Rajesh Kancharla,<sup>‡a</sup> Jeremy A. Bau,<sup>a</sup> Mayur Rahul Taksande,<sup>a</sup> Muhammad Qureshi,<sup>a,b</sup> Kazuhiro Takanabe,<sup>c</sup> Magnus Rueping<sup>a\*</sup>

<sup>a</sup> KAUST Catalysis Center (KCC), King Abdullah University of Science and Technology (KAUST), Thuwal, 23955-6900, Saudi Arabia.

<sup>b</sup> SLAC National Accelerator Laboratory, Stanford Synchrotron Radiation Lightsource, 2575 Sand Hill Road, Menlo Park, California 94025, United States.

<sup>c</sup> Department of Chemical System Engineering, School of Engineering, The University of Tokyo, 7-3-1 Hongo, Bunkyo-ku, Tokyo 113-8656, Japan.

<sup>‡</sup>These authors contributed equally

\*Corresponding author: [magnus.rueping@kaust.edu.sa](mailto:magnus.rueping@kaust.edu.sa)

## Table of Contents

General information

Physical characterization of CdSe/CdO

Photographs of the photochemical reaction setups

General procedure A: for trifluoromethylation of (hetero)arenes

General procedure B: for trifluoromethylation of *N*-arylacrylamides

General procedure C: for trifluoromethylation of vinylic acids

Radical trapping experiments

On-off experiments

Quantum yield measurement

General procedure for scale-up reaction

General procedure for recycling process

Kinetic profile of CdSe and CdO

Selenium oxide experiment

Characterization data

References

NMR spectra

## General Information:

Unless otherwise stated, all reactions were carried out under an argon atmosphere in screw cap reaction tubes. All the reagents and solvents were bought from Sigma Aldrich, TCI and Alfa Aesar in a sure-seal bottle and were used as received. Cadmium catalysts were obtained from Sigma Aldrich. For column chromatography, silica gel (100–200 mesh) from Aldrich was used. A gradient elution using *n*-hexane, diethyl ether, DCM and Ethyl Acetate were performed based on Merck aluminum TLC sheets (silica gel 60 F<sub>254</sub>) and were visualized under UV light (254 nm) or by staining with aqueous potassium permanganate solutions or vanillin alcoholic solution. Organic solutions were concentrated under reduced pressure on a Büchi rotary evaporator using a water bath at 25–30 °C.

All isolated compounds are characterized by <sup>1</sup>H NMR, <sup>13</sup>C NMR, <sup>19</sup>F NMR spectroscopy, and gas chromatography-mass spectra (GC-MS). Copies of the <sup>1</sup>H NMR, <sup>13</sup>C NMR and <sup>19</sup>F NMR can be found in the supporting information. <sup>1</sup>H NMR spectra were recorded in deuterated solvents on Bruker Avance-II spectrometers at 400 or 500 MHz, with residual protic solvent as the internal standard (CDCl<sub>3</sub> referenced at 7.26 ppm, and DMSO as referenced at 2.50 ppm, respectively). <sup>13</sup>C NMR spectra were recorded in deuterated solvents on Bruker Avance-II spectrometers at 101 or 125 MHz, with the central peak of the deuterated solvent as the internal standard (CDCl<sub>3</sub> referenced at 77.16 ppm, and DMSO as referenced at 39.51 ppm, respectively). <sup>19</sup>F NMR spectra were recorded in deuterated solvents on Bruker Avance-II at 377 MHz. Chemical shifts ( $\delta$ ) are given in parts per million (ppm), and coupling constants (*J*) are given in Hertz (Hz) rounded to the nearest 0.1 Hz. The <sup>1</sup>H NMR spectra are reported as  $\delta$ /ppm downfield from tetramethylsilane (multiplicity, number of protons, assignment, coupling constant *J*/Hz). The <sup>13</sup>C NMR spectra are reported as  $\delta$ /ppm and were obtained with <sup>1</sup>H decoupling and if coupled to fluorine, multiplicity and coupling constant (Hz). Data are reported in the following order: chemical shift ( $\delta$ ) in ppm; multiplicities are indicated s (singlet), b (broad), d (doublet), t (triplet), q = quartet, dd = doublet of doublets and dt = doublet of triplets, m (multiplet); coupling constants (*J*) are in Hertz (Hz). All GCMS analyses were done by Agilent 7890A GC system connected with 5975C inert XL EI/CI MSD (with triple axis detector).

## Physical Characterization of CdSe/CdO

UV-visible spectra were acquired using a JASCO V-670 spectrophotometer with integrating sphere. The Kubelka-Munk function was used to process the data. A Kratos Axis Supra spectrophotometer with monochromatic Al K $\alpha$  X-ray source ( $h\nu = 1486.6$  eV) with operating power 300 W, multi-channel plate, and delay line detector was used to collect XPS. The vacuum of the chamber was  $\sim 10^{-9}$  mbar. All spectra were recorded using an aperture slot of 300  $\mu\text{m}$  x 700  $\mu\text{m}$ . Survey spectra were collected using a pass energy of 160 eV and a step size of 1 eV. A pass energy of 20 eV and a step size of 0.1 eV were used for the high-resolution spectra. All binding energies were referenced to the C 1s binding energy of 284.8 eV. Diffraction was carried out using a Bruker D8 ADVANCE X-ray diffractometer at 40 mA/40 kV using Cu K $\alpha$  ( $\lambda = 0.154$  nm)

operating conditions. SEM was performed using a Nova NANO SEM 630 (FEI) at an accelerating voltage of 5 kV and working distance of 5 mm. FT-IR spectra were recorded on a Nicolet 6700 FT-IR (ATR) spectrometer and are reported in wavenumbers ( $\text{cm}^{-1}$ ).

### Photographs of the photochemical reaction setups

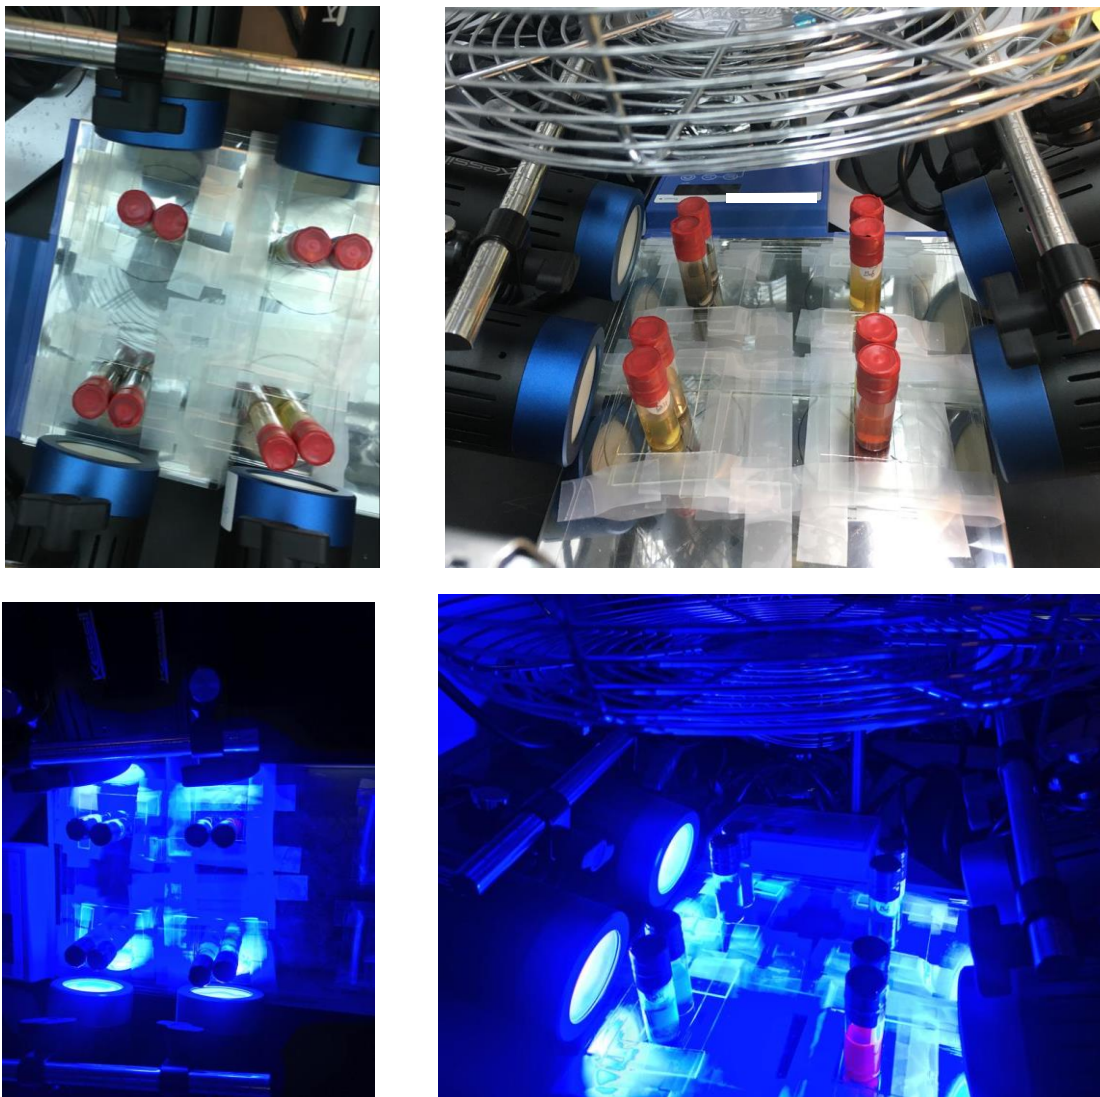

### General procedure A for trifluoromethylation of (hetero)arenes

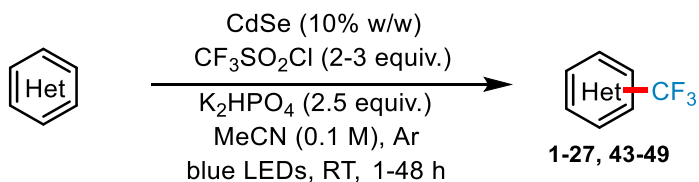



A clean, oven-dried screw cap reaction tube equipped with a Teflon-coated magnetic stir bar was charged with (hetero)arenes (0.3 mmol, 1 equiv.), CdSe (10% w/w) and K<sub>2</sub>HPO<sub>4</sub> (130.5 mg, 0.75 mmol, 2.5 equiv.). The reaction tube was capped with a rubber septum, evacuated and backfilled with argon (3 times). Then, dry MeCN (0.1 M, 3.0 mL) and triflyl chloride (64-96  $\mu$ L, 0.6-0.9 mmol, 2-3 equiv.) were added by syringe and the vial was sealed with parafilm under argon atmosphere. The reaction mixture was stirred at room temperature for 1-48 h under irradiation with 34 W blue LEDs (3 cm away from blue LEDs) with fan cooling. After completion, the reaction mixture was quenched with water and then extracted with diethyl ether or DCM (3 x 10 mL). The organic layer was collected, dried over anhydrous Na<sub>2</sub>SO<sub>4</sub>, and concentrated *in vacuo*. The residue was purified by column chromatography using silica gel (100-200 mesh size) and diethyl ether/petroleum ether or DCM/petroleum ether as the eluent. (w/w = weight by weight ratio with respect to limiting reagent).

### General procedure B for trifluoromethylation of *N*-arylacrylamides

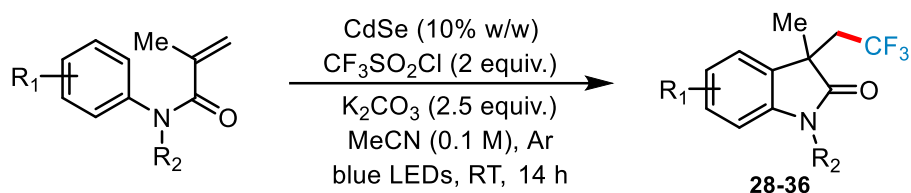

A clean, oven-dried screw cap reaction tube equipped with a Teflon-coated magnetic stir bar was charged with *N*-arylacrylamides (0.3 mmol, 1 equiv.), CdSe (10% w/w) and K<sub>2</sub>CO<sub>3</sub> (103.5 mg, 0.75 mmol, 2.5 equiv.). The reaction tube was capped with a rubber septum, evacuated and backfilled with argon (3 times). Then, dry MeCN (0.1 M, 3.0 mL) and triflyl chloride (64  $\mu$ L, 0.6 mmol, 2 equiv.) were added by syringe and the vial was sealed with parafilm under argon atmosphere. The reaction mixture was stirred at room temperature for 14 h under irradiation with 34 W blue LEDs (3 cm away from blue LEDs) with fan cooling. After completion, the reaction mixture was quenched via exposure to air. The reaction mixture was diluted with DCM and filtered through a small bed of Celite and concentrated *in vacuo*. The residue was purified by column chromatography using silica gel (100-200 mesh size) and EtOAc/petroleum ether as the eluent. (w/w = weight by weight ratio with respect to limiting reagent).

### General procedure C for trifluoromethylation of vinylic acids

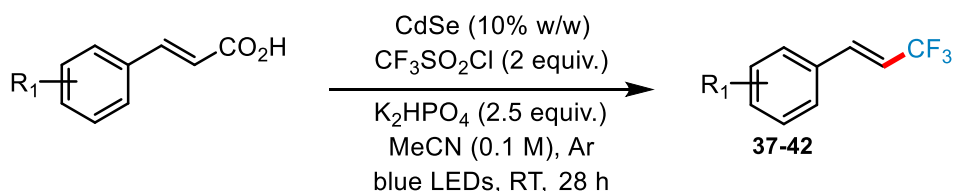

A clean, oven-dried screw cap reaction tube equipped with a Teflon-coated magnetic stir bar was charged with  $\alpha,\beta$ -unsaturated acid (0.3 mmol, 1 equiv.), CdSe (10% w/w) and K<sub>2</sub>HPO<sub>4</sub> (130.5 mg, 0.6 mmol, 2.5 equiv.). The reaction tube was capped with a rubber septum, evacuated and

backfilled with argon (3 times). Then, dry MeCN (0.1 M, 3.0 mL) and triflyl chloride (96  $\mu$ L, 0.9 mmol, 3 equiv.) were added by syringe and the vial was sealed with parafilm under argon atmosphere. The reaction mixture was stirred at room temperature for 28 h under irradiation with 34 W blue LEDs (3 cm away from blue LEDs) with fan cooling. After 28 hours, the reaction mixture was treated with the saturated solution of NaHCO<sub>3</sub> and then extracted with diethyl ether (3 x 10 mL). The organic layer was collected, dried over anhydrous Na<sub>2</sub>SO<sub>4</sub>, and concentrated *in vacuo*. The residue was purified by column chromatography using silica gel (100-200 mesh size) and DCM/petroleum ether or EtOAc/petroleum ether as the eluent. (w/w = weight by weight ratio with respect to limiting reagent).

### Radical trapping experiments

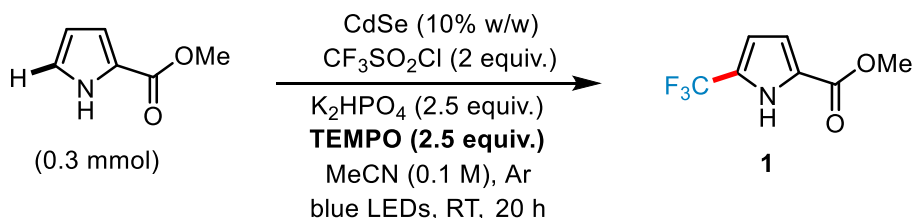

A clean, oven-dried screw cap reaction tube equipped with a Teflon-coated magnetic stir bar was charged with methyl 2-pyrrolicarboxylate (37.5 mg, 0.3 mmol), CdSe (3.7 mg, 10% w/w), K<sub>2</sub>HPO<sub>4</sub> (130.5 mg, 0.75 mmol) and TEMPO (117.2 mg, 0.75 mmol). The reaction tube was capped with a rubber septum, evacuated and backfilled with argon (3 times). Then, dry MeCN (0.1 M, 3.0 mL) and triflyl chloride (64  $\mu$ L, 0.6 mmol, 2 equiv.) were added by syringe and the vial was sealed with parafilm under argon atmosphere. The reaction mixture was stirred at room temperature for 20 h under irradiation with 34 W blue LEDs (3 cm away from blue LEDs) with fan cooling. After 20 h, the reaction was quenched via exposure to air. The GCMS and <sup>19</sup>F NMR analysis of the crude reaction mixture did not show the formation of product **1**.

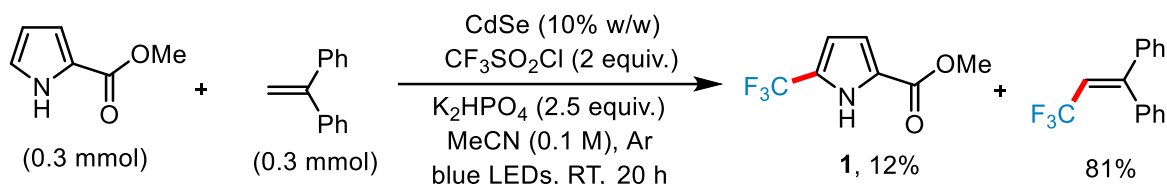

A clean, oven-dried screw cap reaction tube equipped with a Teflon-coated magnetic stir bar was charged with methyl 2-pyrrolicarboxylate (37.5 mg, 0.3 mmol), CdSe (3.7 mg, 10% w/w), K<sub>2</sub>HPO<sub>4</sub> (130.5 mg, 0.75 mmol) and 1,1-diphenylethylene (54 mg, 0.3 mmol). The reaction tube was capped with a rubber septum, evacuated and backfilled with argon (3 times). Then, dry MeCN (0.1 M, 3.0 mL) and triflyl chloride (64  $\mu$ L, 0.6 mmol) were added by syringe and the vial was sealed with parafilm under argon atmosphere. The reaction mixture was stirred at room temperature for 20 h under irradiation with 34 W blue LEDs (3 cm away from blue LEDs) with fan cooling. After 20 h, the reaction mixture was quenched with water and then extracted with diethyl ether (3 x 10 mL). The organic layer was collected, dried over anhydrous Na<sub>2</sub>SO<sub>4</sub>, and

concentrated *in vacuo*. The residue was purified by column chromatography using silica gel (100-200 mesh size) and diethyl ether/petroleum ether as the eluent. Yields were determined by  $^{19}\text{F}$  NMR analysis of the crude mixture using trifluoromethylbenzene as an internal standard.

### On-off experiments

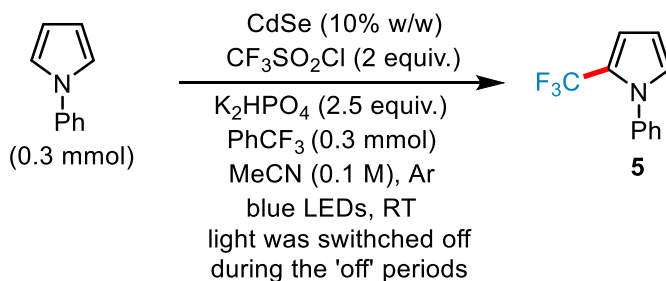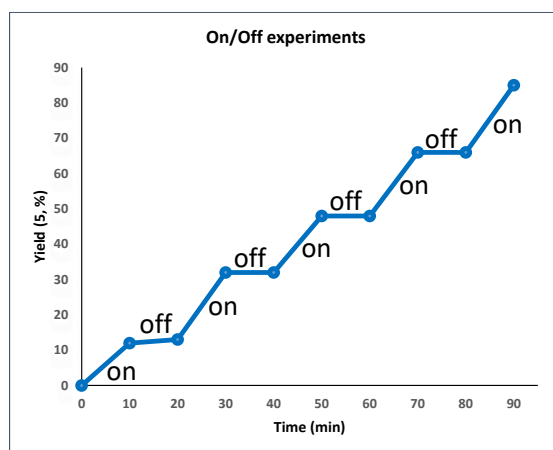

To exclude the possibility of a radical chain process in the reaction, light on-off experiments were carried following the general procedure, with 1-phenyl-1*H*-pyrrole (42.9 mg, 0.3 mmol), CdSe (4.2 mg, 10% w/w),  $\text{K}_2\text{HPO}_4$  (130.5 mg, 0.75 mmol), triflyl chloride (64  $\mu\text{L}$ , 0.6 mmol) and trifluoromethylbenzene (37  $\mu\text{L}$ , 0.3 mmol). The light was kept off during the off-periods and the yields of the reaction were determined by  $^{19}\text{F}$  NMR analysis. No reaction was observed during the light off-cycles which confirms that the reaction is not proceeding by radical chain propagation mechanism.

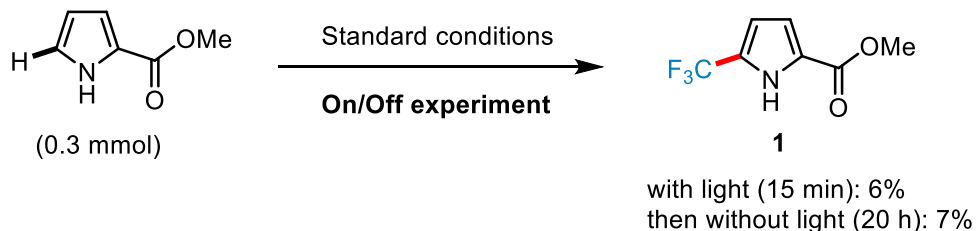

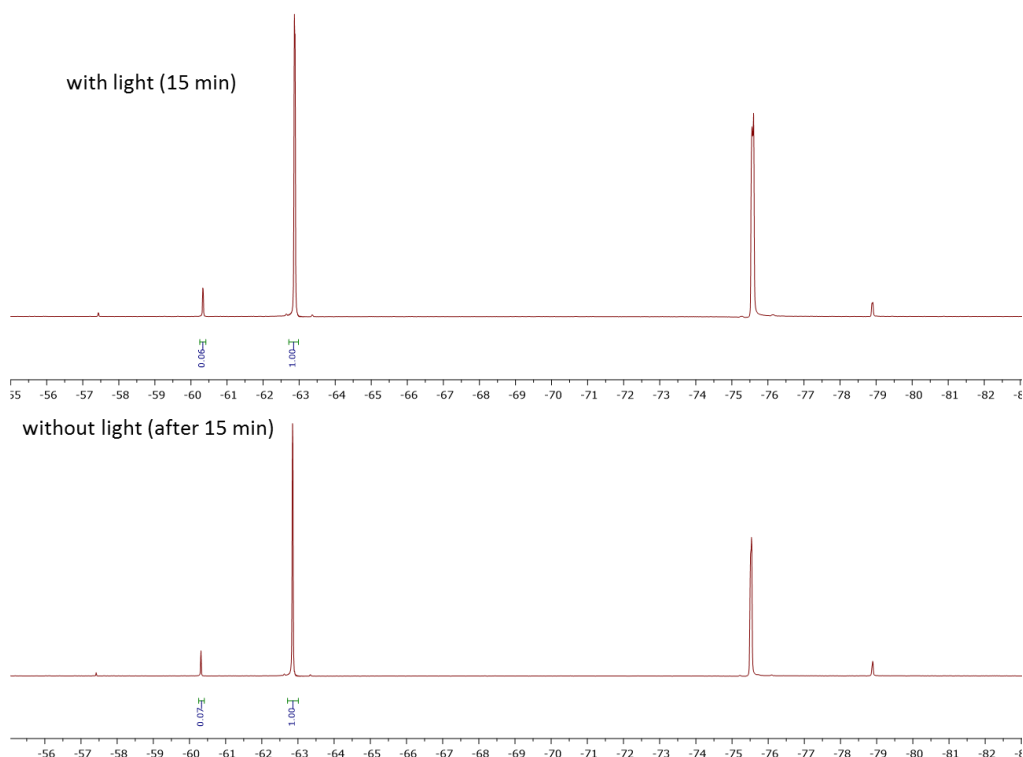

The above reaction was performed according to the general procedure A. The yield of the reaction was determined by  $^{19}\text{F}$  NMR analysis of the crude mixture using trifluoromethylbenzene as an internal standard.

### Quantum yield measurement

The quantum yield was measured according to a published procedure.<sup>1,2</sup> The photon flux was measured using the AvaSpec-3648 spectrometer, AvaLight DHS calibration light source, and FC-UV200-2 fiber-optic cable and the Apparent Quantum Efficiency (AQE) measurement was conducted with a  $420 \pm 5$  nm bandpass filter. Photon flux of this spectrophotometer was determined as  $3.51348 \times 10^{-7}$  Einstein/sec using calibrated light source.

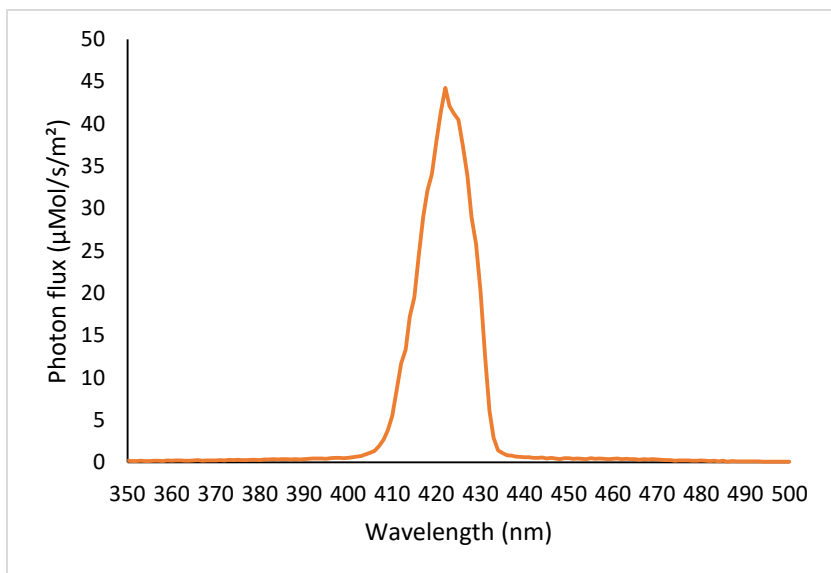

A clean, quartz screw cap reaction tube equipped with a Teflon-coated magnetic stir bar was charged with methyl 2-pyrrolecarboxylate (37.5 mg, 0.3 mmol), CdSe (3.7 mg, 10% w/w), and K<sub>2</sub>HPO<sub>4</sub> (130.5 mg, 0.75 mmol). The reaction tube was capped with a rubber septum, evacuated and backfilled with argon (3 times). Then, dry MeCN (0.1 M, 3.0 mL) and triflyl chloride (64 μL, 0.6 mmol) were added by syringe and the vial was sealed with parafilm under argon atmosphere. The reaction mixture was stirred and irradiated at 420 ±5 nm for 900 s with fan cooling. After irradiation, the reaction was quenched with air and yield was determined by <sup>19</sup>F NMR analysis using trifluoromethylbenzene as an internal standard. Finally, the amount of **1** was measured as 5.7 × 10<sup>-5</sup> mol.

$$\phi = \frac{\text{moles of product}}{\text{moles of absorbed photons}} = \frac{\text{moles of product}}{\text{flux} \cdot t \cdot f}$$

$$\phi(420 \pm 5 \text{ nm}) = \frac{5.7 \times 10^{-5} \text{ mol}}{3.51348 \times 10^{-7} \text{ Einstein/s} \times 900 \text{ s} \times 1} = 0.18$$

### General procedure for high mmol scale reaction

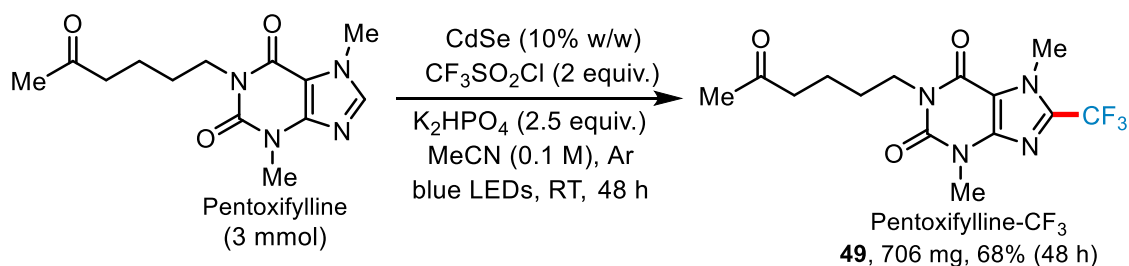

A clean, oven-dried 50 mL screw cap reaction tube equipped with a Teflon-coated magnetic stir bar was charged with pentoxifylline (834 mg, 3 mmol, 1 equiv.), CdSe (83.4 mg, 10% w/w) and  $K_2HPO_4$  (1.30 g, 7.5 mmol, 2.5 equiv.). The reaction tube was capped with a rubber septum, evacuated and backfilled with argon (3 times). Then, dry MeCN (30 mL) and triflyl chloride (639  $\mu$ L, 6 mmol, 2 equiv.) were added by syringe and the vial was sealed with parafilm under argon atmosphere. The reaction mixture was stirred at room temperature for 48 h under irradiation with 34 W blue LEDs (3 cm away from blue LEDs) with fan cooling. After completion, the reaction mixture was quenched with EA and transferred to a centrifuge tube, and centrifuged (6000 rpm for 10 min) until the solid precipitates. Then, the solid was washed with EA ( $4 \times 15$  mL) and centrifuged in order to get complete reaction mixture. The combined organic liquids were collected, and concentrated *in vacuo*. The residue was purified by column chromatography using silica gel (100-200 mesh size) and EA/petroleum ether as the eluent. Finally, the CdSe in the centrifuge tube was washed three times (in the following sequence,  $3 \times$  water,  $3 \times$  EtOH), and the recovered photocatalyst was dried at 125  $^{\circ}$ C for 12 h. The yield of product **49** is 706 mg (68%) and recovered catalyst is 74.6 mg.

### General procedure for recycling process-I

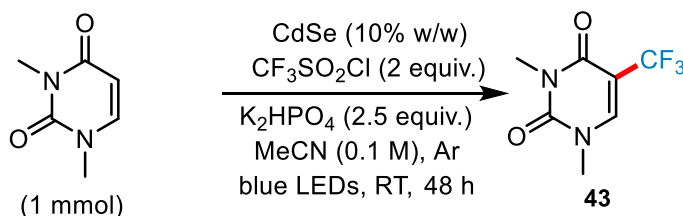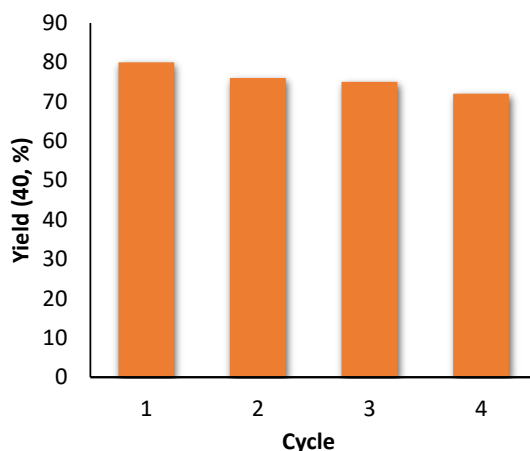

A clean, oven-dried screw cap reaction tube equipped with a Teflon-coated magnetic stir bar was charged with *N,N*-dimethyluracil (140 mg, 1 mmol, 1 equiv.), CdSe (14 mg, 10% w/w) and  $K_2HPO_4$  (435 mg, 2.5 mmol, 2.5 equiv.). The reaction tube was capped with a rubber septum, evacuated and backfilled with argon (3 times). Then, dry MeCN (10 mL) and triflyl chloride (213  $\mu$ L, 2 mmol, 2 equiv.) were added by syringe and the vial was sealed with parafilm under argon

atmosphere. The reaction mixture was stirred at room temperature for 48 h under irradiation with 34 W blue LEDs (3 cm away from blue LEDs) with fan cooling. After completion, yield was determined by  $^{19}\text{F}$  NMR analysis of the crude mixture using trifluoromethylbenzene as an internal standard. The reaction mixture was quenched with EA and transferred to a centrifuge tube, and centrifuged (6000 rpm for 5 min) until the solid precipitates. Then, the solid was washed with EA ( $2 \times 5$  mL) and centrifuged in order to remove the complete organic compounds. Finally, the solid was washed with brine solution ( $2 \times 5$  mL) and EtOH ( $3 \times 5$  mL) and centrifuged (6000 rpm for 5 min) until the CdSe precipitates. The recovered photocatalyst was dried at 125 °C for 12 h and used for next catalytic cycle.

### General procedure for recycling process-II

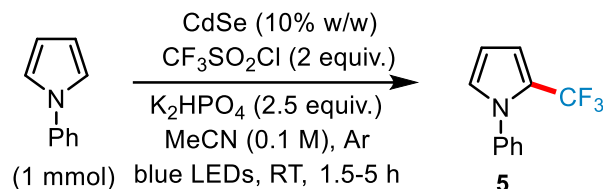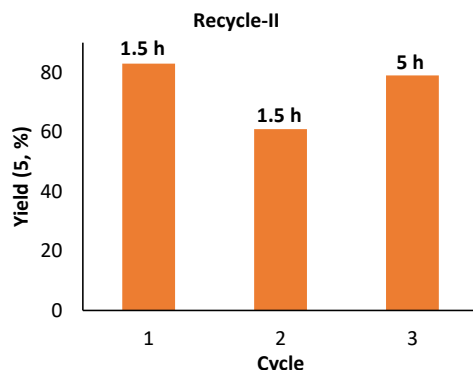

A clean, oven-dried screw cap reaction tube equipped with a Teflon-coated magnetic stir bar was charged with 1-phenyl-1H-pyrrole (143 mg, 1 mmol, 1 equiv.), CdSe (14.3 mg, 10% w/w) and  $\text{K}_2\text{HPO}_4$  (435 mg, 2.5 mmol, 2.5 equiv.). The reaction tube was capped with a rubber septum, evacuated and backfilled with argon (3 times). Then, dry MeCN (10 mL) and triflyl chloride (213  $\mu\text{L}$ , 2 mmol, 2 equiv.) were added by syringe and the vial was sealed with parafilm under argon atmosphere. The reaction mixture was stirred at room temperature for 1.5 h (cycle-1 and cycle-2) under irradiation with 34 W blue LEDs (3 cm away from blue LEDs) with fan cooling. After completion, yield was determined by  $^{19}\text{F}$  NMR analysis of the crude mixture using trifluoromethylbenzene as an internal standard. The reaction mixture was quenched with EA and transferred to a centrifuge tube, and centrifuged (6000 rpm for 5 min) until the solid precipitates. Then, the solid was washed with EA ( $2 \times 5$  mL) and centrifuged in order to remove the complete organic compounds. Finally, the solid was washed with brine solution ( $2 \times 5$  mL) and EtOH ( $3 \times 5$  mL) and centrifuged (6000 rpm for 5 min) until the CdSe precipitates. The recovered

photocatalyst was dried at 125 °C for 12 h and used for next catalytic cycle. The third cycle reaction mixture was carried out for 5 h to get high conversion.

### Kinetic profile of CdSe and CdO

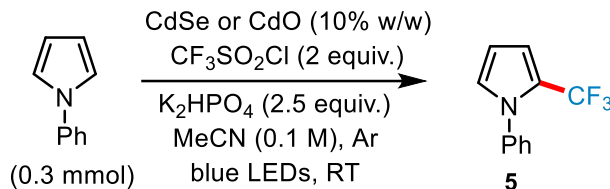

c) Catalytic activity of CdSe vs CdO

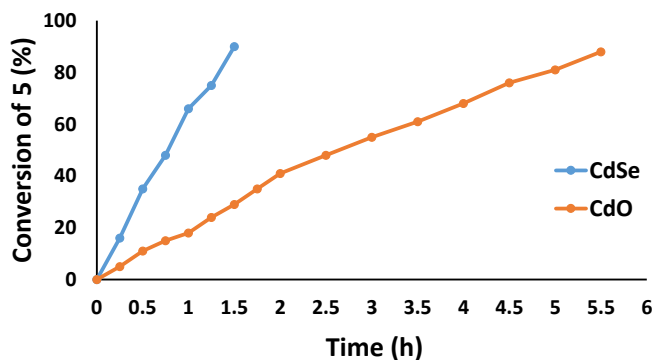

A clean, oven-dried screw cap reaction tube equipped with a Teflon-coated magnetic stir bar was charged with 1-phenyl-1*H*-pyrrole (42.9 mg, 0.3 mmol, 1 equiv.), CdSe (4.3 mg, 10% w/w) or CdO (4.3 mg, 10% w/w) and K<sub>2</sub>HPO<sub>4</sub> (130.5 mg, 0.75 mmol, 2.5 equiv.). The reaction tube was capped with a rubber septum, evacuated and backfilled with argon (3 times). Then, dry MeCN (3 mL) and triflyl chloride (64 μL, 0.6 mmol, 2 equiv.) were added by syringe and the vial was sealed with parafilm under argon atmosphere. The reaction mixture was stirred at room temperature under irradiation with 34 W blue LEDs (3 cm away from blue LEDs) with fan cooling. Every 15 min time interval, the yield of the reaction was determined by <sup>19</sup>F NMR analysis of the crude mixture using trifluoromethylbenzene as an internal standard.

### Role of selenium oxide:



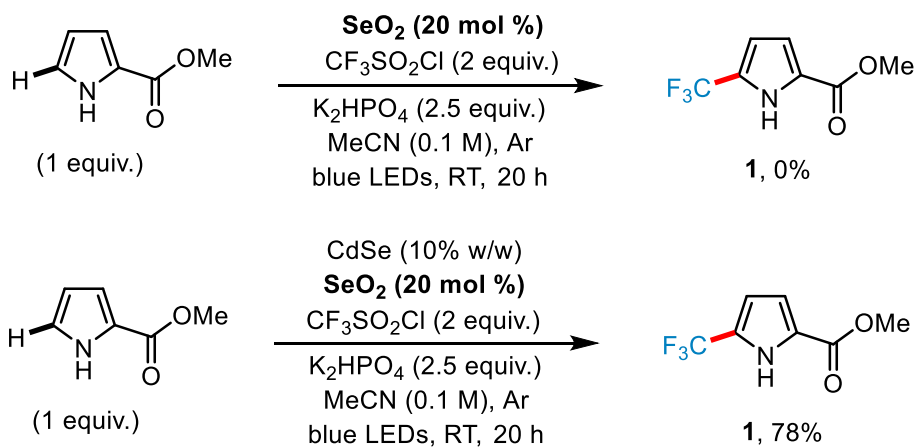

Based on the reaction performed with catalytic amount of selenium(IV) oxide in our reaction condition, we observed that selenium oxide does not play any role. The reactions yields were determined by  $^{19}\text{F}$  NMR analysis of the crude mixture using trifluoromethylbenzene as an internal standard.

#### Characterization Data:

##### Methyl 5-(trifluoromethyl)-1H-pyrrole-2-carboxylate (1)

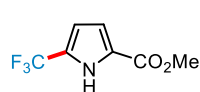

The title compound was synthesized according to the general procedure A employing CdSe (3.7 mg, 10% w/w),  $\text{K}_2\text{HPO}_4$  (130.5 mg, 0.75 mmol), methyl 1H-pyrrole-2-carboxylate (37.5 mg, 0.30 mmol),  $\text{CF}_3\text{SO}_2\text{Cl}$  (64  $\mu\text{L}$ , 0.60 mmol), and  $\text{CH}_3\text{CN}$  (0.1 M, 3 mL) for 20 h. The product was purified by column chromatography (silica gel, gradient 1 to 10% diethyl ether/petroleum ether). Yield = 70% (40.5 mg).

$^1\text{H}$  NMR (400 MHz,  $\text{CDCl}_3$ )  $\delta$  10.50 (s, 1H), 6.90 – 6.86 (m, 1H), 6.60 – 6.58 (m, 1H), 3.92 (s, 3H).  $^{13}\text{C}$  NMR (101 MHz,  $\text{CDCl}_3$ )  $\delta$  161.65, 125.24, 125.04 (q,  $J_{\text{C-F}}$  = 40.4 Hz), 120.56 (q,  $J_{\text{C-F}}$  = 268.6 Hz), 115.12, 111.0 (d,  $J_{\text{C-F}}$  = 3.0 Hz), 52.29.  $^{19}\text{F}$  NMR (377 MHz,  $\text{CDCl}_3$ )  $\delta$  –60.43. GCMS (EI)  $m/z$  calcd. for  $\text{C}_7\text{H}_6\text{F}_3\text{NO}_2$  [ $\text{M}^+$ ] 193.0, found 193.0, 174.0, 162.0, 154.0, 142.0, 133.0, 123.0, 114.0, 107.0, 88.0, 69.0. The analytical data correspond with those reported in the literature.<sup>3</sup>

##### 5-(Trifluoromethyl)-1H-pyrrole-2-carbaldehyde (2)

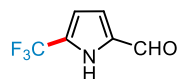

The title compound was synthesized according to the general procedure A employing CdSe (2.8 mg, 10% w/w),  $\text{K}_2\text{HPO}_4$  (130.5 mg, 0.75 mmol), 1H-pyrrole-2-carbaldehyde (28.5 mg, 0.30 mmol),  $\text{CF}_3\text{SO}_2\text{Cl}$  (64  $\mu\text{L}$ , 0.60 mmol), and  $\text{CH}_3\text{CN}$  (0.1 M, 3 mL) for 10 h. The product was purified by column chromatography (silica gel, gradient 1 to 10% diethyl ether/petroleum ether). Yield = 68% (33.2 mg).

$^1\text{H}$  NMR (400 MHz,  $\text{CDCl}_3$ )  $\delta$  10.26 (s, 1H), 9.65 (s, 1H), 7.02 – 6.95 (m, 1H), 6.76 – 6.63 (m, 1H).  $^{13}\text{C}$  NMR (101 MHz,  $\text{CDCl}_3$ )  $\delta$  180.65, 133.97, 127.42 (q,  $J_{\text{C-F}}$  = 40.2 Hz), 120.39 (q,  $J_{\text{C-F}}$  = 268.2 Hz), 120.12, 111.44 (q,  $J_{\text{C-F}}$  = 2.9 Hz).  $^{19}\text{F}$  NMR (377 MHz,  $\text{CDCl}_3$ )  $\delta$  –60.92. GCMS (EI)  $m/z$  calcd. for  $\text{C}_6\text{H}_4\text{F}_3\text{NO}$  [ $\text{M}^+$ ] 163.0, found 163.0, 142.0, 114.0, 107.0, 88.0, 75.0, 69.0, 64.0. The analytical data correspond with those reported in the literature.<sup>4</sup>

### 5-(Trifluoromethyl)-1*H*-pyrrole-2-carbonitrile (3)

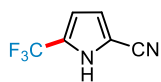

The title compound was synthesized according to the general procedure A employing CdSe (2.7 mg, 10% w/w), K<sub>2</sub>HPO<sub>4</sub> (130.5 mg, 0.75 mmol), 1*H*-pyrrole-2-carbonitrile (27.6 mg, 0.30 mmol), CF<sub>3</sub>SO<sub>2</sub>Cl (64 μL, 0.60 mmol), and CH<sub>3</sub>CN (0.1 M, 3 mL) for 10 h. The product was purified by column chromatography (silica gel, gradient 1 to 10% diethyl ether/petroleum ether). Yield = 74% (35.5 mg).

**<sup>1</sup>H NMR (400 MHz, CDCl<sub>3</sub>)** δ 10.06 (s, 1H), 6.93 – 6.82 (m, 1H), 6.72 – 6.53 (m, 1H). **<sup>13</sup>C NMR (101 MHz, CDCl<sub>3</sub>)** δ 125.71 (q, *J*<sub>C-F</sub> = 40.9 Hz), 120.29, 119.85 (q, *J*<sub>C-F</sub> = 268.0 Hz), 112.84, 110.88 (q, *J*<sub>C-F</sub> = 3.0 Hz), 103.90. **<sup>19</sup>F NMR (377 MHz, CDCl<sub>3</sub>)** δ – 60.56. **GCMS (EI)** *m/z* calcd. for C<sub>6</sub>H<sub>3</sub>F<sub>3</sub>N<sub>2</sub> [M<sup>+</sup>] 160.0, found 160.0, 140.0, 110.0, 89.0, 69.0, 64.0, 57.0, 52.0, 37.0.

### *tert*-Butyl 2-(trifluoromethyl)-1*H*-pyrrole-1-carboxylate (4)

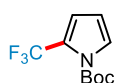

The title compound was synthesized according to the general procedure A employing CdSe (5.0 mg, 10% w/w), K<sub>2</sub>HPO<sub>4</sub> (130.5 mg, 0.75 mmol), *tert*-butyl 1*H*-pyrrole-1-carboxylate (50.1 mg, 0.30 mmol), CF<sub>3</sub>SO<sub>2</sub>Cl (64 μL, 0.60 mmol), and CH<sub>3</sub>CN (0.1 M, 3 mL) for 3 h. The product was purified by column chromatography (silica gel, gradient 1 to 10% diethyl ether/petroleum ether). Yield = 90% (63.4 mg).

**<sup>1</sup>H NMR (400 MHz, CDCl<sub>3</sub>)** δ 7.44 (dd, *J* = 3.3, 1.9 Hz, 1H), 6.73 (dd, *J* = 3.6, 1.9 Hz, 1H), 6.19 (t, *J* = 3.5 Hz, 1H), 1.61 (s, 9H). **<sup>13</sup>C NMR (101 MHz, CDCl<sub>3</sub>)** δ 147.57, 125.93 (d, *J*<sub>C-F</sub> = 2.3 Hz), 121.89 (q, *J*<sub>C-F</sub> = 40.2 Hz), 120.68 (q, *J*<sub>C-F</sub> = 266.3 Hz), 117.93 (q, *J*<sub>C-F</sub> = 4.5 Hz), 109.76, 85.78, 27.85. **<sup>19</sup>F NMR (377 MHz, CDCl<sub>3</sub>)** δ – 58.31. **GCMS (EI)** *m/z* calcd. for C<sub>10</sub>H<sub>12</sub>F<sub>3</sub>NO<sub>2</sub> [M<sup>+</sup>] 235.1, found 235.0, 220.0, 200.0, 176.0, 162.0, 142.0, 135.0, 114.0, 107.0, 88.0, 69.0, 57.1. The analytical data correspond with those reported in the literature.<sup>3</sup>

### 1-Phenyl-2-(trifluoromethyl)-1*H*-pyrrole (5)

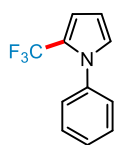

The title compound was synthesized according to the general procedure A employing CdSe (4.2 mg, 10% w/w), K<sub>2</sub>HPO<sub>4</sub> (130.5 mg, 0.75 mmol), 1-phenyl-1*H*-pyrrole (42.9 mg, 0.30 mmol), CF<sub>3</sub>SO<sub>2</sub>Cl (64 μL, 0.60 mmol), and CH<sub>3</sub>CN (0.1 M, 3 mL) for 1.5 h. The product was purified by column chromatography (silica gel, gradient 1 to 10% diethyl ether/petroleum ether). Yield = 81% (51.2 mg).

**<sup>1</sup>H NMR (400 MHz, CDCl<sub>3</sub>)** δ 7.47 – 7.43 (m, 3H), 7.39-7.37 (m, 2H), 6.89 (t, *J* = 2.4 Hz, 1H), 6.74 – 6.73 (m, 1H), 6.28 (t, *J* = 3.3 Hz, 1H). **<sup>13</sup>C NMR (101 MHz, CDCl<sub>3</sub>)** δ 139.24, 129.12, 128.62, 127.38 (q, *J*<sub>C-F</sub> = 3.0 Hz), 126.64, 122.35 (q, *J*<sub>C-F</sub> = 38.4 Hz), 121.33 (q, *J*<sub>C-F</sub> = 267.6 Hz), 112.86 (q, *J*<sub>C-F</sub> = 3.0 Hz), 108.36. **<sup>19</sup>F NMR (377 MHz, CDCl<sub>3</sub>)** δ – 55.87. **GCMS (EI)** *m/z* calcd. for C<sub>11</sub>H<sub>8</sub>F<sub>3</sub>N [M<sup>+</sup>] 211.0, found 211.1, 191.1, 172.1, 164.1, 158.0, 142.1, 133.1, 115.1, 105.6, 88.0, 77.1, 51.1. The analytical data correspond with those reported in the literature.<sup>5</sup>

### 1-Benzyl-2-(trifluoromethyl)-1*H*-pyrrole (6)

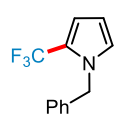

The title compound was synthesized according to the general procedure A employing CdSe (4.7 mg, 10% w/w), K<sub>2</sub>HPO<sub>4</sub> (130.5 mg, 0.75 mmol), 1-benzyl-1*H*-pyrrole (47.1 mg, 0.30 mmol), CF<sub>3</sub>SO<sub>2</sub>Cl (64 μL, 0.60 mmol), and CH<sub>3</sub>CN (0.1 M, 3 mL) for 1 h. The product was purified by column chromatography (silica gel, gradient 1 to 10% diethyl ether/petroleum ether). Yield = 72% (48.6 mg).

**<sup>1</sup>H NMR (400 MHz, CDCl<sub>3</sub>)** δ 7.47 – 7.34 (m, 3H), 7.18 (d, *J* = 7.1 Hz, 2H), 6.78 (t, *J* = 2.3 Hz, 1H), 6.70 (d, *J* = 3.7 Hz, 1H), 6.24 (t, *J* = 3.3 Hz, 1H), 5.24 (s, 2H). **<sup>13</sup>C NMR (101 MHz, CDCl<sub>3</sub>)** δ 137.07, 128.88, 128.02, 127.15, 126.09 (q, *J*<sub>C-F</sub> = 2.3 Hz), 121.71 (q, *J*<sub>C-F</sub> = 266.6 Hz), 121.38 (q, *J*<sub>C-F</sub> = 38.1 Hz), 111.90 (q, *J*<sub>C-F</sub> = 3.7 Hz), 108.13, 51.51. **<sup>19</sup>F NMR (377 MHz, CDCl<sub>3</sub>)** δ – 57.51. **GCMS (EI)** *m/z* calcd. for C<sub>12</sub>H<sub>10</sub>F<sub>3</sub>N [M<sup>+</sup>] 225.1, found 225.1, 206.1, 154.0, 128.1, 91.1, 89.1, 77.1, 69.1, 65.1, 63.1.

### 1-Methyl-2-(trifluoromethyl)-1*H*-pyrrole (7)

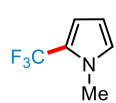

The title compound was synthesized according to the general procedure A employing CdSe (2.4 mg, 10% w/w), K<sub>2</sub>CO<sub>3</sub> (103.5 mg, 0.75 mmol), 1-methyl-1*H*-pyrrole (24.3 mg, 0.30 mmol), CF<sub>3</sub>SO<sub>2</sub>Cl (64 μL, 0.60 mmol), and CH<sub>3</sub>CN (0.1 M, 3 mL) for 1 h. The reaction mixture was purified by prep TLC using 15% DCM in petroleum ether to provide the title compound. Yield = 89% (yield determined by <sup>19</sup>F NMR analysis due to the high volatility of the desired product).

**<sup>1</sup>H NMR (400 MHz, CDCl<sub>3</sub>)** δ 6.71 (d, *J* = 2.3 Hz, 1H), 6.56 (d, *J* = 3.5 Hz, 1H), 6.09 (dd, *J* = 4.2, 2.2 Hz, 1H), 3.72 (s, 3H). **<sup>13</sup>C NMR (101 MHz, CDCl<sub>3</sub>)** δ 126.73, 121.64 (q, *J*<sub>C-F</sub> = 267.1 Hz), 121.13 (q, *J*<sub>C-F</sub> = 38.1 Hz), 111.67 (q, *J*<sub>C-F</sub> = 3.5 Hz), 107.31, 34.90. **<sup>19</sup>F NMR (377 MHz, CDCl<sub>3</sub>)** δ – 58.83. **GCMS (EI)** *m/z* calcd. for C<sub>6</sub>H<sub>6</sub>F<sub>3</sub>N [M<sup>+</sup>] 149.0, found 149.1, 130.1, 99.1, 78.1, 75.0, 69.0, 64.1, 57.1. The analytical data correspond with those reported in the literature.<sup>6</sup>

### 3-Methyl-2-(trifluoromethyl)-1*H*-indole (8)

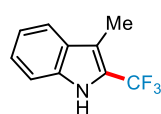

The title compound was synthesized according to the general procedure A employing CdSe (3.9 mg, 10% w/w), K<sub>2</sub>CO<sub>3</sub> (103.5 mg, 0.75 mmol), 3-methyl-1*H*-indole (39.3 mg, 0.30 mmol), CF<sub>3</sub>SO<sub>2</sub>Cl (64 μL, 0.60 mmol), and CH<sub>3</sub>CN (0.1 M, 3 mL) for 1 h. The product was purified by column chromatography (silica gel, gradient 10 to 15% diethyl ether/petroleum ether). Yield = 75% (44.7 mg).

**<sup>1</sup>H NMR (400 MHz, CDCl<sub>3</sub>)** δ 8.18 (s, 1H), 7.66 (d, *J* = 8.0 Hz, 1H), 7.36 (dt, *J* = 15.0, 8.1 Hz, 2H), 7.21 (t, *J* = 7.4 Hz, 1H), 2.46 (q, *J* = 1.9 Hz, 3H). **<sup>13</sup>C NMR (101 MHz, CDCl<sub>3</sub>)** δ 135.31, 128.19, 124.89, 122.25 (q, *J*<sub>C-F</sub> = 269.6 Hz), 121.66 (q, *J*<sub>C-F</sub> = 36.8 Hz), 120.51, 120.22, 114.20 (d, *J*<sub>C-F</sub> = 3.0 Hz), 111.69, 8.46. **<sup>19</sup>F NMR (377 MHz, CDCl<sub>3</sub>)** δ – 58.61. **GCMS (EI)** *m/z* calcd. for C<sub>10</sub>H<sub>8</sub>F<sub>3</sub>N [M<sup>+</sup>] 199.1, found 199.1, 178.1, 158.0, 130.1, 102.0, 89.4, 77.0, 65.0, 51.0. The analytical data correspond with those reported in the literature.<sup>7</sup>

## 2-(Trifluoromethyl)-1*H*-indole-3-carbaldehyde (9)

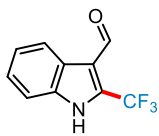

The title compound was synthesized according to the general procedure A employing CdSe (4.3 mg, 10% w/w), K<sub>2</sub>HPO<sub>4</sub> (130.5 mg, 0.75 mmol), 1*H*-indole-3-carbaldehyde (43.5 mg, 0.30 mmol), CF<sub>3</sub>SO<sub>2</sub>Cl (64  $\mu$ L, 0.60 mmol), and CH<sub>3</sub>CN (0.1 M, 3 mL) for 8 h. The product was purified by column chromatography (silica gel, gradient 10 to 15% diethyl ether/petroleum ether). Yield = 58% (37 mg).

**<sup>1</sup>H NMR (400 MHz, DMSO-*d*<sub>6</sub>)**  $\delta$  13.43 (s, 1H), 10.24 (s, 1H), 8.25 (d, *J* = 8.0 Hz, 1H), 7.61 (d, *J* = 8.2 Hz, 1H), 7.44 (t, *J* = 7.6 Hz, 1H), 7.36 (t, *J* = 7.5 Hz, 1H). **<sup>13</sup>C NMR (101 MHz, DMSO-*d*<sub>6</sub>)**  $\delta$  184.22, 135.35, 130.87 (q, *J*<sub>C-F</sub> = 39.0 Hz), 125.80, 124.32, 123.83, 121.98, 120.78 (q, *J*<sub>C-F</sub> = 270.4 Hz), 115.43, 113.18. **<sup>19</sup>F NMR (377 MHz, DMSO-*d*<sub>6</sub>)**  $\delta$  – 55.46. **GCMS (EI) *m/z*** calcd. for C<sub>10</sub>H<sub>6</sub>F<sub>3</sub>NO [M<sup>+</sup>] 213.0, found 213.1, 212.1, 192.0, 184.0, 164.0, 144.0, 134.0, 114.0, 107.0, 96.0, 88.0, 75.0. The analytical data correspond with those reported in the literature.<sup>8</sup>

## 1-(2-(Trifluoromethyl)-1*H*-indol-3-yl)ethan-1-one (10)

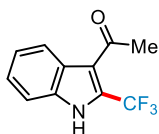

The title compound was synthesized according to the general procedure A employing CdSe (4.7 mg, 10% w/w), K<sub>2</sub>HPO<sub>4</sub> (130.5 mg, 0.75 mmol), 1-(1*H*-indol-3-yl)ethan-1-one (47.7 mg, 0.30 mmol), CF<sub>3</sub>SO<sub>2</sub>Cl (64  $\mu$ L, 0.60 mmol), and CH<sub>3</sub>CN (0.1 M, 3 mL) for 8 h. The product was purified by column chromatography (silica gel, gradient 10 to 15% diethyl ether/petroleum ether). Yield = 60% (40.8 mg).

**<sup>1</sup>H NMR (400 MHz, DMSO-*d*<sub>6</sub>)**  $\delta$  13.07 (s, 1H), 8.09 (d, *J* = 8.1 Hz, 1H), 7.60 (d, *J* = 8.2 Hz, 1H), 7.39 (t, *J* = 7.5 Hz, 1H), 7.33 (t, *J* = 7.6 Hz, 1H), 2.65 (s, 3H). **<sup>13</sup>C NMR (101 MHz, DMSO-*d*<sub>6</sub>)**  $\delta$  192.60, 134.67, 126.77 (q, *J*<sub>C-F</sub> = 38.3 Hz), 125.26, 124.81, 122.96, 121.86, 120.91 (q, *J*<sub>C-F</sub> = 269.9 Hz), 116.18, 113.24, 30.90. **<sup>19</sup>F NMR (377 MHz, DMSO-*d*<sub>6</sub>)**  $\delta$  – 57.47. **GCMS (EI) *m/z*** calcd. for C<sub>11</sub>H<sub>8</sub>F<sub>3</sub>NO [M<sup>+</sup>] 227.1, found 227.1, 212.1, 192.0, 178.1, 164.0, 144.0, 128.1, 114.0, 96.0, 75.0, 63.0.

## Methyl 2-(trifluoromethyl)-1*H*-indole-3-carboxylate (11)

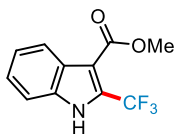

The title compound was synthesized according to the general procedure A employing CdSe (5.2 mg, 10% w/w), K<sub>2</sub>HPO<sub>4</sub> (130.5 mg, 0.75 mmol), methyl 1*H*-indole-3-carboxylate (52.5 mg, 0.30 mmol), CF<sub>3</sub>SO<sub>2</sub>Cl (64  $\mu$ L, 0.60 mmol), and CH<sub>3</sub>CN (0.1 M, 3 mL) for 8 h. The product was purified by column chromatography (silica gel, gradient 10 to 15% diethyl ether/petroleum ether). Yield = 64% (46.6 mg).

**<sup>1</sup>H NMR (400 MHz, CDCl<sub>3</sub>)**  $\delta$  9.09 (s, 1H), 8.26 (d, *J* = 8.0 Hz, 1H), 7.48 (d, *J* = 8.0 Hz, 1H), 7.41 – 7.32 (m, 2H), 3.98 (s, 3H). **<sup>13</sup>C NMR (101 MHz, CDCl<sub>3</sub>)**  $\delta$  163.69, 133.91, 129.04 (q, *J*<sub>C-F</sub> = 38.8 Hz), 126.61, 125.67, 123.38, 123.00, 120.52 (q, *J*<sub>C-F</sub> = 270.0 Hz), 112.07, 108.41, 51.84. **<sup>19</sup>F NMR (377 MHz, CDCl<sub>3</sub>)**  $\delta$  – 59.86. **GCMS (EI) *m/z*** calcd. for C<sub>11</sub>H<sub>8</sub>F<sub>3</sub>NO<sub>2</sub> [M<sup>+</sup>] 243.1, found 243.1, 212.1, 192.0, 184.0, 164.0, 144.0, 134.1, 114.0, 107.0, 96.0, 87.0. The analytical data correspond with those reported in the literature.<sup>9</sup>

### 3-(2-Bromoethyl)-2-(trifluoromethyl)-1H-indole (12)

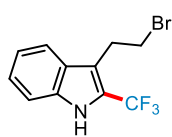

The title compound was synthesized according to the general procedure A employing CdSe (6.6 mg, 10% w/w), K<sub>2</sub>HPO<sub>4</sub> (130.5 mg, 0.75 mmol), 3-(2-bromoethyl)-1H-indole (66.9 mg, 0.30 mmol), CF<sub>3</sub>SO<sub>2</sub>Cl (64  $\mu$ L, 0.60 mmol), and CH<sub>3</sub>CN (0.1 M, 3 mL) for 1 h. The product was purified by column chromatography (silica gel, gradient 10 to 15% diethyl ether/petroleum ether). Yield = 69% (60.2 mg).

**<sup>1</sup>H NMR (400 MHz, CDCl<sub>3</sub>)**  $\delta$  8.42 (s, 1H), 7.75 (d,  $J$  = 8.1 Hz, 1H), 7.48 (d,  $J$  = 8.2 Hz, 1H), 7.41 (t,  $J$  = 7.6 Hz, 1H), 7.37 – 7.25 (m, 1H), 3.73 – 3.59 (m, 2H), 3.56 – 3.45 (m, 2H). **<sup>13</sup>C NMR (101 MHz, CDCl<sub>3</sub>)**  $\delta$  135.22, 127.11, 125.27, 122.38 (q,  $J_{C-F}$  = 37.0 Hz), 121.88 (q,  $J_{C-F}$  = 268.9 Hz), 121.13, 120.07, 112.01, 115.45 (d,  $J_{C-F}$  = 3.0 Hz), 31.40, 27.91. **<sup>19</sup>F NMR (377 MHz, CDCl<sub>3</sub>)**  $\delta$  – 58.34. **GCMS (EI)**  $m/z$  calcd. for C<sub>11</sub>H<sub>9</sub>BrF<sub>3</sub>N [M<sup>+</sup>] 291.0, found 293.0, 291.0, 272.0, 212.1, 198.1, 190.1, 178.1, 172.1, 158.1, 152.1, 143.1, 128.1, 115.1.

### 1-(1-Methyl-2-(trifluoromethyl)-1H-indol-3-yl)ethan-1-one (13)

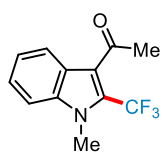

The title compound was synthesized according to the general procedure A employing CdSe (5.2 mg, 10% w/w), K<sub>2</sub>HPO<sub>4</sub> (130.5 mg, 0.75 mmol), 1-(1-methyl-1H-indol-3-yl)ethan-1-one (51.9 mg, 0.30 mmol), CF<sub>3</sub>SO<sub>2</sub>Cl (64  $\mu$ L, 0.60 mmol), and CH<sub>3</sub>CN (0.1 M, 3 mL) for 8 h. The product was purified by column chromatography (silica gel, gradient 10 to 15% diethyl ether/petroleum ether). Yield = 68% (49.1 mg).

**<sup>1</sup>H NMR (400 MHz, CDCl<sub>3</sub>)**  $\delta$  7.91 (d,  $J$  = 8.1 Hz, 1H), 7.47 – 7.37 (m, 2H), 7.29 (ddd,  $J$  = 8.1, 5.4, 2.6 Hz, 1H), 3.90 (q,  $J$  = 1.3 Hz, 3H), 2.64 (q,  $J$  = 1.4 Hz, 3H). **<sup>13</sup>C NMR (101 MHz, CDCl<sub>3</sub>)**  $\delta$  196.64, 137.26, 125.72 (q,  $J_{C-F}$  = 37.5 Hz), 125.60, 124.76, 122.79, 122.09, 121.25 (q,  $J_{C-F}$  = 270.3 Hz), 120.04, 110.21, 32.05 (d,  $J_{C-F}$  = 3.3 Hz), 31.79 (d,  $J_{C-F}$  = 3.5 Hz). **<sup>19</sup>F NMR (377 MHz, CDCl<sub>3</sub>)**  $\delta$  – 54.93. **GCMS (EI)**  $m/z$  calcd. for C<sub>12</sub>H<sub>10</sub>F<sub>3</sub>NO [M<sup>+</sup>] 241.1, found 241.1, 226.1, 222.1, 211.0, 198.0, 183.0, 178.0, 169.0, 158.0, 151.0, 128.1, 113.0, 101.1, 75.1.

### 2,4,6-Trimethyl-3-(trifluoromethyl)pyridine (14)

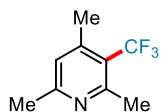

The title compound was synthesized according to the general procedure A employing CdSe (3.6 mg, 10% w/w), K<sub>2</sub>HPO<sub>4</sub> (130.5 mg, 0.75 mmol), 2,4,6-trimethylpyridine (36.3 mg, 0.30 mmol), CF<sub>3</sub>SO<sub>2</sub>Cl (96  $\mu$ L, 0.90 mmol), and CH<sub>3</sub>CN (0.1 M, 3 mL) for 35 h. The reaction mixture was purified by prep TLC using 20% DCM in petroleum ether to provide the title compound. Yield = 80% (yield determined by <sup>19</sup>F NMR analysis due to the high volatility of the desired product).

**<sup>1</sup>H NMR (400 MHz, CDCl<sub>3</sub>)**  $\delta$  6.87 (s, 1H), 2.63 (q,  $J$  = 3.1 Hz, 3H), 2.47 (s, 3H), 2.40 (q,  $J$  = 3.1 Hz, 3H). **<sup>13</sup>C NMR (101 MHz, CDCl<sub>3</sub>)**  $\delta$  159.98, 156.57, 147.21, 125.64 (q,  $J_{C-F}$  = 274.9 Hz), 124.46, 121.42 (q,  $J_{C-F}$  = 29.9 Hz), 24.24 (q,  $J_{C-F}$  = 3.8 Hz), 23.93, 20.98 (q,  $J_{C-F}$  = 3.8 Hz). **<sup>19</sup>F NMR (377 MHz, CDCl<sub>3</sub>)**  $\delta$  – 54.35. **GCMS (EI)**  $m/z$  calcd. for C<sub>9</sub>H<sub>10</sub>F<sub>3</sub>N [M<sup>+</sup>] 189.1, found

189.1, 174.0, 169.1, 154.1, 148.0, 139.1, 133.0, 127.0, 120.1, 101.0, 77.0, 40.0. The analytical data correspond with those reported in the literature.<sup>7</sup>

### 2,6-Dimethyl-3-(trifluoromethyl)pyridine (15)

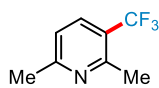

The title compound was synthesized according to the general procedure A employing CdSe (3.2 mg, 10% w/w), K<sub>2</sub>HPO<sub>4</sub> (130.5 mg, 0.75 mmol), 2,6-dimethylpyridine (32.1 mg, 0.30 mmol), CF<sub>3</sub>SO<sub>2</sub>Cl (96 μL, 0.90 mmol), and CH<sub>3</sub>CN (0.1 M, 3 mL) for 48 h. The reaction mixture was purified by prep TLC using 25% DCM in petroleum ether to provide the title compound. Yield = 75% (yield determined by <sup>19</sup>F NMR analysis due to the high volatility of the desired product).

**<sup>1</sup>H NMR (400 MHz, CDCl<sub>3</sub>)** δ 7.76 (d, *J* = 8.1 Hz, 1H), 7.07 (d, *J* = 8.0 Hz, 1H), 2.67 (s, 3H), 2.58 (s, 3H). **<sup>13</sup>C NMR (101 MHz, CDCl<sub>3</sub>)** δ 161.29, 156.45, 134.25 (d, *J*<sub>C-F</sub> = 5.2 Hz), 124.42 (q, *J*<sub>C-F</sub> = 272.2 Hz), 122.24 (q, *J*<sub>C-F</sub> = 31.6 Hz), 120.27, 24.57, 22.72. **<sup>19</sup>F NMR (377 MHz, CDCl<sub>3</sub>)** δ – 61.90. **GCMS (EI)** *m/z* calcd. for C<sub>8</sub>H<sub>8</sub>F<sub>3</sub>N [M<sup>+</sup>] 175.1, found 175.0, 160.0, 156.0, 140.0, 133.0, 125.0, 114.0, 107.1, 92.0, 77.0. The analytical data correspond with those reported in the literature.<sup>7</sup>

### 2,3,5-Trimethyl-6-(trifluoromethyl)pyrazine (16)

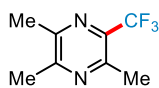

The title compound was synthesized according to the general procedure A employing CdSe (3.6 mg, 10% w/w), K<sub>2</sub>HPO<sub>4</sub> (130.5 mg, 0.75 mmol), 2,3,5-trimethylpyrazine (36.6 mg, 0.30 mmol), CF<sub>3</sub>SO<sub>2</sub>Cl (96 μL, 0.90 mmol), and CH<sub>3</sub>CN (0.1 M, 3 mL) for 48 h. The product was purified by column chromatography (silica gel, gradient 10 to 15% diethyl ether/petroleum ether). Yield = 72% (41 mg).

**<sup>1</sup>H NMR (400 MHz, CDCl<sub>3</sub>)** δ 2.63 (q, *J* = 2.0 Hz, 3H), 2.56 (s, 3H), 2.54 (s, 3H). **<sup>13</sup>C NMR (101 MHz, CDCl<sub>3</sub>)** δ 154.95, 148.85, 148.63, 138.49 (q, *J*<sub>C-F</sub> = 34.1 Hz), 122.40 (q, *J*<sub>C-F</sub> = 274.3 Hz), 22.09, 21.41, 20.91 (q, *J*<sub>C-F</sub> = 2.5 Hz). **<sup>19</sup>F NMR (377 MHz, CDCl<sub>3</sub>)** δ – 65.18. **GCMS (EI)** *m/z* calcd. for C<sub>8</sub>H<sub>9</sub>F<sub>3</sub>N<sub>2</sub> [M<sup>+</sup>] 190.1, found 190.1, 171.1, 149.0, 121.1, 107.0, 88.0, 80.1, 69.0, 57.0, 42.1.

### 2,5-Dimethyl-3-(trifluoromethyl)pyrazine (17)

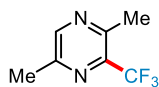

The title compound was synthesized according to the general procedure A employing CdSe (3.2 mg, 10% w/w), K<sub>2</sub>HPO<sub>4</sub> (130.5 mg, 0.75 mmol), 2,5-dimethylpyrazine (32.4 mg, 0.30 mmol), CF<sub>3</sub>SO<sub>2</sub>Cl (96 μL, 0.90 mmol), and CH<sub>3</sub>CN (0.1 M, 3 mL) for 48 h. The product was purified by column chromatography (silica gel, gradient 10 to 15% diethyl ether/petroleum ether). Yield = 67% (35.3 mg).

**<sup>1</sup>H NMR (400 MHz, CDCl<sub>3</sub>)** δ 8.50 (s, 1H), 2.67 (d, *J* = 2.3 Hz, 3H), 2.57 (s, 3H). **<sup>13</sup>C NMR (101 MHz, CDCl<sub>3</sub>)** δ 150.31, 149.37, 146.32, 140.92 (q, *J*<sub>C-F</sub> = 34.1 Hz), 122.05 (q, *J*<sub>C-F</sub> = 274.8 Hz), 21.00 (d, *J*<sub>C-F</sub> = 2.5 Hz), 20.95. **<sup>19</sup>F NMR (377 MHz, CDCl<sub>3</sub>)** δ – 65.90. **GCMS (EI)** *m/z* calcd. for C<sub>7</sub>H<sub>7</sub>F<sub>3</sub>N<sub>2</sub> [M<sup>+</sup>] 176.1, found 176.0, 157.1, 149.0, 107.0, 88.0, 80.1, 69.0, 57.0. The analytical data correspond with those reported in the literature.<sup>7</sup>



### 3,5-Dimethyl-2-(trifluoromethyl)pyrazine (18)

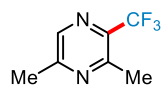

The title compound was synthesized according to the general procedure A employing CdSe (3.2 mg, 10% w/w), K<sub>2</sub>HPO<sub>4</sub> (130.5 mg, 0.75 mmol), 2,6-dimethylpyrazine (32.4 mg, 0.30 mmol), CF<sub>3</sub>SO<sub>2</sub>Cl (96  $\mu$ L, 0.90 mmol), and CH<sub>3</sub>CN (0.1 M, 3 mL) for 48 h. The product was purified by column chromatography (silica gel, gradient 10 to 15% diethyl ether/petroleum ether). Yield = 65% (34.3 mg).

**<sup>1</sup>H NMR (400 MHz, CDCl<sub>3</sub>)**  $\delta$  8.33 (s, 1H), 2.70 (q,  $J$  = 1.9 Hz, 3H), 2.61 (s, 3H). **<sup>13</sup>C NMR (101 MHz, CDCl<sub>3</sub>)**  $\delta$  156.37, 151.83, 140.45, 139.31 (q,  $J_{C-F}$  = 34.4 Hz), 122.34 (q,  $J_{C-F}$  = 274.3 Hz), 21.74, 21.49 (q,  $J_{C-F}$  = 2.3 Hz). **<sup>19</sup>F NMR (377 MHz, CDCl<sub>3</sub>)**  $\delta$  – 65.50. **GCMS (EI)**  $m/z$  calcd. for C<sub>7</sub>H<sub>7</sub>F<sub>3</sub>N<sub>2</sub> [M<sup>+</sup>] 176.1, found 176.0, 157.0, 149.0, 135.0, 115.0, 107.0, 88.0, 69.0, 66.0. The analytical data correspond with those reported in the literature.<sup>6</sup>

### S-((5-(Trifluoromethyl)furan-2-yl)methyl)methanethioate (19)

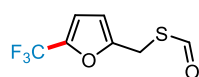

The title compound was synthesized according to the general procedure A employing CdSe (4.2 mg, 10% w/w), K<sub>2</sub>HPO<sub>4</sub> (130.5 mg, 0.75 mmol), S-(furan-2-ylmethyl)methanethioate (42.6 mg, 0.30 mmol), CF<sub>3</sub>SO<sub>2</sub>Cl (64  $\mu$ L, 0.60 mmol) and CH<sub>3</sub>CN (0.1 M, 3 mL) for 48 h. The product was purified by column chromatography (silica gel, gradient 10 to 15% diethyl ether/petroleum ether). Yield = 68% (42.8 mg).

**<sup>1</sup>H NMR (400 MHz, CDCl<sub>3</sub>)**  $\delta$  10.16 (s, 1H), 6.70 (dt,  $J$  = 2.6, 1.3 Hz, 1H), 6.40 – 6.21 (m, 1H), 4.24 (s, 2H). **<sup>13</sup>C NMR (101 MHz, CDCl<sub>3</sub>)**  $\delta$  185.81, 153.00, 141.62 (q,  $J_{C-F}$  = 42.8 Hz), 118.98 (q,  $J_{C-F}$  = 267.0 Hz), 112.77 (q,  $J_{C-F}$  = 2.9 Hz), 109.37, 22.83. **<sup>19</sup>F NMR (377 MHz, CDCl<sub>3</sub>)**  $\delta$  – 64.12. **GCMS (EI)**  $m/z$  calcd. for C<sub>7</sub>H<sub>5</sub>F<sub>3</sub>O<sub>2</sub>S [M<sup>+</sup>] 210.0, found 210.0, 191.0, 182.0, 149.0, 130.0, 121.0, 111.0, 99.0, 79.0, 69.0, 51.1.

### 1,2,4,5-Tetramethyl-3-(trifluoromethyl)benzene (20)

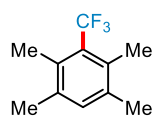

The title compound was synthesized according to the general procedure A employing CdSe (4.0 mg, 10% w/w), K<sub>2</sub>HPO<sub>4</sub> (130.5 mg, 0.75 mmol), 1,2,4,5-tetramethylbenzene (40.2 mg, 0.30 mmol), CF<sub>3</sub>SO<sub>2</sub>Cl (64  $\mu$ L, 0.60 mmol) and CH<sub>3</sub>CN (0.1 M, 3 mL) for 30 h. The product was purified by column chromatography (silica gel, gradient 100% petroleum ether). Yield = 66% (40 mg).

**<sup>1</sup>H NMR (400 MHz, CDCl<sub>3</sub>)**  $\delta$  7.10 (s, 1H), 2.33 (q,  $J$  = 3.3 Hz, 6H), 2.26 (s, 6H). **<sup>13</sup>C NMR (101 MHz, CDCl<sub>3</sub>)**  $\delta$  135.24, 134.68, 133.65, 128.18 (q,  $J_{C-F}$  = 27.0 Hz), 126.48 (q,  $J_{C-F}$  = 277.1 Hz), 20.70, 16.78 (q,  $J_{C-F}$  = 4.7 Hz). **<sup>19</sup>F NMR (377 MHz, CDCl<sub>3</sub>)**  $\delta$  – 51.74. **GCMS (EI)**  $m/z$  calcd. for C<sub>11</sub>H<sub>13</sub>F<sub>3</sub> [M<sup>+</sup>] 202.1, found 202.1, 187.1, 159.1, 147.1, 133.1, 115.1, 103.1, 91.1, 77.1, 65.0.

### 1,4-Dimethoxy-2-(trifluoromethyl)benzene (21)

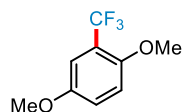

The title compound was synthesized according to the general procedure A employing CdSe (4.1 mg, 10% w/w), K<sub>2</sub>HPO<sub>4</sub> (130.5 mg, 0.75 mmol), 1,4-dimethoxybenzene (41.4 mg, 0.30 mmol), CF<sub>3</sub>SO<sub>2</sub>Cl (64  $\mu$ L, 0.60 mmol) and

CH<sub>3</sub>CN (0.1 M, 3 mL) for 35 h. The reaction mixture was purified by prep TLC using 5% DCM in petroleum ether to provide the title compound. Yield = 80% (yield determined by <sup>19</sup>F NMR analysis due to the high volatility of the desired product).

**<sup>1</sup>H NMR (400 MHz, CDCl<sub>3</sub>)** δ 7.12 (d, *J* = 3.0 Hz, 1H), 7.02 (dd, *J* = 9.0, 3.0 Hz, 1H), 6.94 (d, *J* = 9.0 Hz, 1H), 3.86 (s, 3H), 3.79 (s, 3H). **<sup>13</sup>C NMR (101 MHz, CDCl<sub>3</sub>)** δ 152.95, 151.53, 123.43 (q, *J*<sub>C-F</sub> = 272.2 Hz), 119.37 (q, *J*<sub>C-F</sub> = 30.9 Hz), 118.08, 113.57, 112.82 (q, *J*<sub>C-F</sub> = 5.5 Hz), 56.55, 55.87. **<sup>19</sup>F NMR (377 MHz, CDCl<sub>3</sub>)** δ – 62.41. **GCMS (EI)** *m/z* calcd. for C<sub>9</sub>H<sub>9</sub>F<sub>3</sub>O<sub>2</sub> [M<sup>+</sup>] 206.1, found 206.1, 191.1, 163.1, 157.0, 148.0, 129.0, 120.1, 101.0, 95.1. The analytical data correspond with those reported in the literature.<sup>7</sup>

### 1,3,5-Trimethoxy-2-(trifluoromethyl)benzene (22)

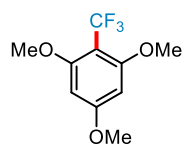

The title compound was synthesized according to the general procedure A employing CdSe (5.0 mg, 10% w/w), K<sub>2</sub>HPO<sub>4</sub> (130.5 mg, 0.75 mmol), 1,3,5-trimethoxybenzene (50.4 mg, 0.30 mmol), CF<sub>3</sub>SO<sub>2</sub>Cl (64 μL, 0.60 mmol) and CH<sub>3</sub>CN (0.1 M, 3 mL) for 3 h. The product was purified by column chromatography (silica gel, gradient 5 to 10% diethyl ether/petroleum ether). Yield = 81% (57.3 mg).

**<sup>1</sup>H NMR (400 MHz, CDCl<sub>3</sub>)** δ 6.12 (s, 2H), 3.83 (s, 9H). **<sup>13</sup>C NMR (101 MHz, CDCl<sub>3</sub>)** δ 163.64, 160.51, 124.49 (q, *J*<sub>C-F</sub> = 273.2 Hz), 100.40 (q, *J*<sub>C-F</sub> = 30.1 Hz), 91.33, 56.33, 55.47. **<sup>19</sup>F NMR (377 MHz, CDCl<sub>3</sub>)** δ – 54.08. **GCMS (EI)** *m/z* calcd. for C<sub>10</sub>H<sub>11</sub>F<sub>3</sub>O<sub>3</sub> [M<sup>+</sup>] 236.1, found 236.1, 207.1, 193.1, 176.1, 163.1, 139.1, 120.0, 107.0, 95.1, 69.0. The analytical data correspond with those reported in the literature.<sup>3</sup>

### 3,5-Dimethoxy-2-(trifluoromethyl)benzonitrile (23)

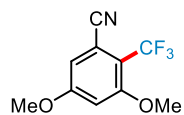

The title compound was synthesized according to the general procedure A employing CdSe (4.8 mg, 10% w/w), K<sub>2</sub>HPO<sub>4</sub> (130.5 mg, 0.75 mmol), 3,5-dimethoxybenzonitrile (48.9 mg, 0.30 mmol), CF<sub>3</sub>SO<sub>2</sub>Cl (64 μL, 0.60 mmol) and CH<sub>3</sub>CN (0.1 M, 3 mL) for 48 h. The product was purified by column chromatography (silica gel, gradient 5 to 10% diethyl ether/petroleum ether). Overall yield: 70% (80:20, r.r., the yield and ratio were determined by <sup>19</sup>F NMR analysis). Isolated yield of reported compound **23** is 51% (35.3 mg).

**<sup>1</sup>H NMR (400 MHz, CDCl<sub>3</sub>)** δ 6.81 (d, *J* = 2.4 Hz, 1H), 6.73 (s, 1H), 3.90 (s, 3H), 3.88 (s, 3H). **<sup>13</sup>C NMR (101 MHz, CDCl<sub>3</sub>)** δ 163.14, 160.04, 122.59 (q, *J*<sub>C-F</sub> = 273.5 Hz), 116.34, 113.29 (q, *J*<sub>C-F</sub> = 31.6 Hz), 112.33 (q, *J*<sub>C-F</sub> = 3.0 Hz), 110.81, 103.86, 56.58, 56.13. **<sup>19</sup>F NMR (377 MHz, CDCl<sub>3</sub>)** δ – 57.82. **GCMS (EI)** *m/z* calcd. for C<sub>10</sub>H<sub>8</sub>F<sub>3</sub>NO<sub>2</sub> [M<sup>+</sup>] 231.1, found 231.1, 212.0, 201.0, 188.0, 182.0, 171.0, 158.0, 154.0, 145.0, 139.0, 132.0, 126.0, 121.0, 104.1, 88.0.



### 3,4,5-Trimethoxy-2-(trifluoromethyl)benzaldehyde (24)

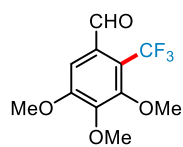

The title compound was synthesized according to the general procedure A employing CdSe (5.8 mg, 10% w/w), K<sub>2</sub>HPO<sub>4</sub> (130.5 mg, 0.75 mmol), 3,4,5-trimethoxybenzaldehyde (58.8 mg, 0.30 mmol), CF<sub>3</sub>SO<sub>2</sub>Cl (64 μL, 0.60 mmol) and CH<sub>3</sub>CN (0.1 M, 3 mL) for 24 h. The product was purified by column chromatography (silica gel, gradient 10 to 15% diethyl ether/petroleum ether). Yield: 77% (61 mg).

**<sup>1</sup>H NMR (400 MHz, CDCl<sub>3</sub>)** δ 10.32 (q, *J* = 2.4 Hz, 1H), 7.34 (s, 1H), 3.95 (s, 6H), 3.93 (s, 3H). **<sup>13</sup>C NMR (101 MHz, CDCl<sub>3</sub>)** δ 189.31 (q, *J*<sub>C-F</sub> = 5.7 Hz), 155.92, 152.94, 147.47, 130.98, 124.30 (q, *J*<sub>C-F</sub> = 275.2 Hz), 118.09 (q, *J*<sub>C-F</sub> = 31.1 Hz), 107.40, 62.17, 61.16, 56.39. **<sup>19</sup>F NMR (377 MHz, CDCl<sub>3</sub>)** δ – 51.13. **GCMS (EI)** *m/z* calcd. for C<sub>11</sub>H<sub>11</sub>F<sub>3</sub>O<sub>4</sub> [M<sup>+</sup>] 264.1, found 264.1, 249.0, 229.0, 193.0, 178.0, 163.0, 135.0, 119.0, 107.0, 87.0, 69.0, 57.0. The analytical data correspond with those reported in the literature.<sup>10</sup>

### 4-Methoxy-*N,N*-dimethyl-2-(trifluoromethyl)aniline (25)

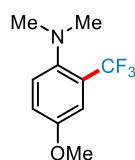

The title compound was synthesized according to the general procedure A employing CdSe (4.5 mg, 10% w/w), K<sub>2</sub>HPO<sub>4</sub> (130.5 mg, 0.75 mmol), 4-methoxy-*N,N*-dimethylaniline (45.3 mg, 0.30 mmol), CF<sub>3</sub>SO<sub>2</sub>Cl (64 μL, 0.60 mmol) and CH<sub>3</sub>CN (0.1 M, 3 mL) for 24 h. The product was purified by column chromatography (silica gel, gradient 5 to 10% diethyl ether/petroleum ether). Yield: 70% (46 mg).

**<sup>1</sup>H NMR (400 MHz, CDCl<sub>3</sub>)** δ 7.38 (d, *J* = 8.9 Hz, 1H), 7.12 (s, 1H), 7.04 (dd, *J* = 8.8, 3.0 Hz, 1H), 3.82 (s, 3H), 2.67 (s, 6H). **<sup>13</sup>C NMR (101 MHz, CDCl<sub>3</sub>)** δ 156.39, 127.94 (d, *J*<sub>C-F</sub> = 28.8 Hz), 125.07, 123.86 (q, *J*<sub>C-F</sub> = 274.7 Hz), 118.20, 112.29 (d, *J*<sub>C-F</sub> = 7.0 Hz), 55.79, 46.59. **<sup>19</sup>F NMR (377 MHz, CDCl<sub>3</sub>)** δ – 60.68. **GCMS (EI)** *m/z* calcd. for C<sub>10</sub>H<sub>12</sub>F<sub>3</sub>NO [M<sup>+</sup>] 219.1, found 219.1, 204.1, 188.0, 176.1, 160.0, 145.0, 132.0, 115.1, 101.0, 92.1, 75.1, 63.1.

### 1-Methoxy-2-methyl-5-nitro-3-(trifluoromethyl)benzene (26)

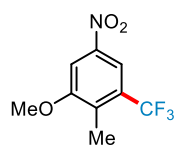

The title compound was synthesized according to the general procedure A employing CdSe (5.0 mg, 10% w/w), K<sub>2</sub>HPO<sub>4</sub> (130.5 mg, 0.75 mmol), 2-methoxy-1-methyl-4-nitrobenzene (50.1 mg, 0.30 mmol), CF<sub>3</sub>SO<sub>2</sub>Cl (64 μL, 0.60 mmol) and CH<sub>3</sub>CN (0.1 M, 3 mL) for 24 h. The product was purified by column chromatography (silica gel, gradient 10 to 15% diethyl ether/petroleum ether). Yield: 43% (30 mg).

**<sup>1</sup>H NMR (400 MHz, CDCl<sub>3</sub>)** δ 7.54 (s, 1H), 7.33 (s, 1H), 3.95 (s, 3H), 2.31 (s, 3H). **<sup>13</sup>C NMR (101 MHz, CDCl<sub>3</sub>)** δ 160.26, 147.34, 132.44, 130.60, 129.54 (q, *J*<sub>C-F</sub> = 5.4 Hz), 122.47 (q, *J*<sub>C-F</sub> = 273.2 Hz), 115.56 (q, *J*<sub>C-F</sub> = 34.1 Hz), 56.36, 16.44. **<sup>19</sup>F NMR (377 MHz, CDCl<sub>3</sub>)** δ – 58.90. **GCMS (EI)** *m/z* calcd. for C<sub>9</sub>H<sub>8</sub>F<sub>3</sub>NO<sub>3</sub> [M<sup>+</sup>] 235.0, found 235.0, 189.1, 174.0, 127.0, 109.0, 96.0, 91.0, 77.1, 75.1, 51.1.

### 2-Methyl-3-(6-(trifluoromethyl)benzo[d][1,3]dioxol-5-yl)propanal (27)

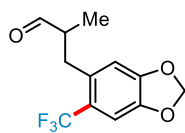

The title compound was synthesized according to the general procedure A employing CdSe (5.7 mg, 10% w/w), K<sub>2</sub>HPO<sub>4</sub> (130.5 mg, 0.75 mmol), 3-(benzo[d][1,3]dioxol-5-yl)-2-methylpropanal (57.6 mg, 0.30 mmol), CF<sub>3</sub>SO<sub>2</sub>Cl (64  $\mu$ L, 0.60 mmol) and CH<sub>3</sub>CN (0.1 M, 3 mL) for 24 h. The product was purified by column chromatography (silica gel, gradient 15 to 20% diethyl ether/petroleum ether). Yield: 61% (47.5 mg).

**<sup>1</sup>H NMR (400 MHz, CDCl<sub>3</sub>)**  $\delta$  9.68 (s, 1H), 7.07 (s, 1H), 6.75 (s, 1H), 6.02 (s, 2H), 3.20 (q,  $J$  = 7.5 Hz, 1H), 2.70 – 2.62 (m, 2H), 1.12 (d,  $J$  = 5.8 Hz, 3H). **<sup>13</sup>C NMR (101 MHz, CDCl<sub>3</sub>)**  $\delta$  203.71, 150.29, 146.40, 133.13, 124.30 (q,  $J_{C-F}$  = 36.4 Hz), 111.49, 109.71 (q,  $J_{C-F}$  = 252.2 Hz), 106.76 (d,  $J_{C-F}$  = 6.3 Hz), 102.15, 48.10, 32.91, 13.64. **<sup>19</sup>F NMR (377 MHz, CDCl<sub>3</sub>)**  $\delta$  – 57.73. **GCMS (EI)**  $m/z$  calcd. for C<sub>12</sub>H<sub>11</sub>F<sub>3</sub>O<sub>3</sub> [M<sup>+</sup>] 260.1, found 260.1, 232.0, 203.0, 190.0, 173.0, 145.0, 133.1, 127.0, 119.0, 103.0.

### 1,3-Dimethyl-3-(2,2,2-trifluoroethyl)indolin-2-one (28)

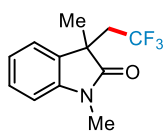

The title compound was synthesized according to the general procedure B employing CdSe (5.2 mg, 10% w/w), K<sub>2</sub>CO<sub>3</sub> (103.5 mg, 0.75 mmol), *N*-methyl-*N*-phenylmethacrylamide (52.5 mg, 0.30 mmol), CF<sub>3</sub>SO<sub>2</sub>Cl (64  $\mu$ L, 0.60 mmol) and CH<sub>3</sub>CN (0.1 M, 3 mL) for 14 h. The product was purified by column chromatography (silica gel, gradient 5 to 10% EA/petroleum ether). Yield: 72% (52.4 mg).

**<sup>1</sup>H NMR (400 MHz, CDCl<sub>3</sub>)**  $\delta$  7.31 (t,  $J$  = 7.7 Hz, 1H), 7.26 (d,  $J$  = 7.3 Hz, 1H), 7.09 (t,  $J$  = 7.5 Hz, 1H), 6.88 (d,  $J$  = 7.8 Hz, 1H), 3.23 (s, 3H), 2.82 (dq,  $J$  = 15.1, 10.7 Hz, 1H), 2.65 (dq,  $J$  = 15.2, 10.5 Hz, 1H), 1.40 (s, 3H). **<sup>13</sup>C NMR (101 MHz, CDCl<sub>3</sub>)**  $\delta$  178.60, 142.95, 131.10, 128.63, 125.35 (q,  $J_{C-F}$  = 278.3 Hz), 123.65, 122.76, 108.57, 44.50 (d,  $J_{C-F}$  = 2.3 Hz), 40.74 (q,  $J_{C-F}$  = 28.2 Hz), 26.55, 25.11. **<sup>19</sup>F NMR (377 MHz, CDCl<sub>3</sub>)**  $\delta$  – 61.96 (t,  $J$  = 10.2 Hz). **GCMS (EI)**  $m/z$  calcd. for C<sub>12</sub>H<sub>12</sub>F<sub>3</sub>NO [M<sup>+</sup>] 243.1, found 243.1, 228.1, 208.1, 200.1, 160.1, 145.1, 130.1, 117.1, 103.1, 89.3, 77.1, 65.1. The analytical data correspond with those reported in the literature.<sup>11</sup>

### 1,3,5-Trimethyl-3-(2,2,2-trifluoroethyl)indolin-2-one (29)

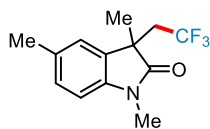

The title compound was synthesized according to the general procedure B employing CdSe (5.6 mg, 10% w/w), K<sub>2</sub>CO<sub>3</sub> (103.5 mg, 0.75 mmol), *N*-methyl-*N*-(*p*-tolyl)methacrylamide (56.7 mg, 0.30 mmol), CF<sub>3</sub>SO<sub>2</sub>Cl (64  $\mu$ L, 0.60 mmol) and CH<sub>3</sub>CN (0.1 M, 3 mL) for 14 h. The product was purified by column chromatography (silica gel, gradient 5 to 10% EA/petroleum ether). Yield: 93% (71.7 mg).

**<sup>1</sup>H NMR (400 MHz, CDCl<sub>3</sub>)**  $\delta$  7.10 (d,  $J$  = 8.0 Hz, 1H), 7.07 (s, 1H), 6.76 (d,  $J$  = 7.9 Hz, 1H), 3.21 (s, 3H), 2.80 (dq,  $J$  = 15.1, 10.7 Hz, 1H), 2.62 (dq,  $J$  = 15.2, 10.5 Hz, 1H), 2.35 (s, 3H), 1.38 (s, 3H). **<sup>13</sup>C NMR (101 MHz, CDCl<sub>3</sub>)**  $\delta$  178.54, 140.58, 132.29, 131.19, 128.87, 125.39 (q,  $J_{C-F}$  = 278.3 Hz), 124.45, 108.27, 44.55 (d,  $J_{C-F}$  = 2.6 Hz), 40.74 (q,  $J_{C-F}$  = 28.2 Hz), 26.57, 25.16, 21.24. **<sup>19</sup>F NMR (377 MHz, CDCl<sub>3</sub>)**  $\delta$  – 61.90 (t,  $J$  = 10.8 Hz). **GCMS (EI)**  $m/z$  calcd. for C<sub>13</sub>H<sub>14</sub>F<sub>3</sub>NO

[M<sup>+</sup>] 257.1, found 257.1, 242.1, 222.1, 174.1, 159.1, 144.1, 130.1, 115.1, 103.1, 91.1, 77.1, 71.7. The analytical data correspond with those reported in the literature.<sup>11</sup>

### 5-Methoxy-1,3-dimethyl-3-(2,2,2-trifluoroethyl)indolin-2-one (30)

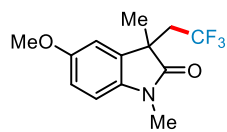

The title compound was synthesized according to the general procedure B employing CdSe (6.1 mg, 10% w/w), K<sub>2</sub>CO<sub>3</sub> (103.5 mg, 0.75 mmol), *N*-(4-methoxyphenyl)-*N*-methylmethacrylamide (61.5 mg, 0.30 mmol), CF<sub>3</sub>SO<sub>2</sub>Cl (64 μL, 0.60 mmol) and CH<sub>3</sub>CN (0.1 M, 3 mL) for 14 h. The product was purified by column chromatography (silica gel, gradient 5 to 10% EA/petroleum ether). Yield: 86% (70.4 mg).

**<sup>1</sup>H NMR (400 MHz, CDCl<sub>3</sub>)** δ 6.86 (d, *J* = 2.3 Hz, 1H), 6.81 (dd, *J* = 8.5, 2.5 Hz, 1H), 6.76 (d, *J* = 8.4 Hz, 1H), 3.77 (s, 3H), 3.18 (s, 3H), 2.79 (dq, *J* = 15.2, 10.7 Hz, 1H), 2.61 (dq, *J* = 15.2, 10.5 Hz, 1H), 1.37 (s, 3H). **<sup>13</sup>C NMR (101 MHz, CDCl<sub>3</sub>)** δ 178.16, 156.13, 136.42, 132.45, 125.33 (q, *J*<sub>C-F</sub> = 278.2 Hz), 112.66, 111.29, 108.78, 55.85, 44.84 (q, *J*<sub>C-F</sub> = 2.2 Hz), 40.64 (q, *J*<sub>C-F</sub> = 28.3 Hz), 26.53, 25.09. **<sup>19</sup>F NMR (377 MHz, CDCl<sub>3</sub>)** δ – 61.88 (t, *J* = 13.3 Hz). **GCMS (EI)** *m/z* calcd. for C<sub>13</sub>H<sub>14</sub>F<sub>3</sub>NO<sub>2</sub> [M<sup>+</sup>] 273.1, found 258.1, 238.1, 230.1, 210.1, 190.1, 175.1, 160.1, 147.1, 132.1, 118.1, 104.1, 91.1. The analytical data correspond with those reported in the literature.<sup>11</sup>

### 5-Fluoro-1,3-dimethyl-3-(2,2,2-trifluoroethyl)indolin-2-one (31)

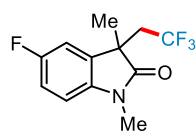

The title compound was synthesized according to the general procedure B employing CdSe (5.7 mg, 10% w/w), K<sub>2</sub>CO<sub>3</sub> (103.5 mg, 0.75 mmol), *N*-(4-fluorophenyl)-*N*-methylmethacrylamide (57.9 mg, 0.30 mmol), CF<sub>3</sub>SO<sub>2</sub>Cl (64 μL, 0.60 mmol) and CH<sub>3</sub>CN (0.1 M, 3 mL) for 14 h. The product was purified by column chromatography (silica gel, gradient 5 to 10% EA/petroleum ether). Yield: 75% (58.7 mg). **<sup>1</sup>H NMR (400 MHz, CDCl<sub>3</sub>)** δ 7.03 – 6.97 (m, 2H), 6.79 (dd, *J* = 9.3, 4.2 Hz, 1H), 3.21 (s, 3H), 2.81 (dq, *J* = 15.5, 10.7 Hz, 1H), 2.62 (dq, *J* = 15.4, 10.4 Hz, 1H), 1.39 (s, 3H). **<sup>13</sup>C NMR (101 MHz, CDCl<sub>3</sub>)** δ 178.22, 159.40 (d, *J*<sub>C-F</sub> = 240.9 Hz), 138.92, 132.74 (d, *J*<sub>C-F</sub> = 8.1 Hz), 125.23 (q, *J* = 278.2 Hz), 114.95 (d, *J*<sub>C-F</sub> = 23.5 Hz), 111.89 (d, *J*<sub>C-F</sub> = 24.9 Hz), 109.08 (d, *J*<sub>C-F</sub> = 8.1 Hz), 44.93, 40.67 (q, *J*<sub>C-F</sub> = 28.4 Hz), 26.68, 25.01. **<sup>19</sup>F NMR (377 MHz, CDCl<sub>3</sub>)** δ – 61.99 (t, *J* = 10.4 Hz), – 120.43 (d, *J* = 10.2 Hz). **GCMS (EI)** *m/z* calcd. for C<sub>12</sub>H<sub>11</sub>F<sub>4</sub>NO [M<sup>+</sup>] 261.1, found 261.1, 246.1, 226.1, 193.1, 178.1, 163.1, 148.1, 135.1, 124.1, 95.1, 69.1. The analytical data correspond with those reported in the literature.<sup>11</sup>

### 5-Chloro-1,3-dimethyl-3-(2,2,2-trifluoroethyl)indolin-2-one (32)

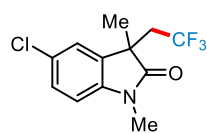

The title compound was synthesized according to the general procedure B employing CdSe (6.2 mg, 10% w/w), K<sub>2</sub>CO<sub>3</sub> (103.5 mg, 0.75 mmol), *N*-(4-chlorophenyl)-*N*-methylmethacrylamide (62.7 mg, 0.30 mmol), CF<sub>3</sub>SO<sub>2</sub>Cl (64 μL, 0.60 mmol) and CH<sub>3</sub>CN (0.1 M, 3 mL) for 14 h. The product was purified by column chromatography (silica gel, gradient 5 to 10% EA/petroleum ether). Yield: 68% (56.5 mg).

**<sup>1</sup>H NMR (400 MHz, CDCl<sub>3</sub>)** δ 7.28 (dd, *J* = 8.3, 2.1 Hz, 1H), 7.23 (d, *J* = 2.0 Hz, 1H), 6.80 (d, *J* = 8.2 Hz, 1H), 3.21 (s, 3H), 2.82 (dq, *J* = 15.3, 10.6 Hz, 1H), 2.62 (dq, *J* = 15.2, 10.4 Hz, 1H), 1.39 (s, 3H). **<sup>13</sup>C NMR (101 MHz, CDCl<sub>3</sub>)** δ 178.05, 141.57, 132.80, 128.64, 128.21, 125.18 (q, *J*<sub>C-F</sub> = 278.2 Hz), 124.21, 109.53, 44.70 (d, *J*<sub>C-F</sub> = 2.6 Hz), 40.68 (q, *J*<sub>C-F</sub> = 28.4 Hz), 26.67, 25.03. **<sup>19</sup>F NMR (377 MHz, CDCl<sub>3</sub>)** δ – 61.96 (t, *J* = 10.8 Hz). **GCMS (EI)** *m/z* calcd. for C<sub>12</sub>H<sub>11</sub>ClF<sub>3</sub>NO [M<sup>+</sup>] 277.0, found 279.1, 277.0, 264.0, 262.0, 244.0, 242.0, 196.0, 194.0, 179.0, 164.0, 159.1, 130.1, 115.1, 103.1, 101.0, 89.1. The analytical data correspond with those reported in the literature.<sup>11</sup>

### 5-Bromo-1,3-dimethyl-3-(2,2,2-trifluoroethyl)indolin-2-one (33)

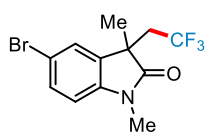

The title compound was synthesized according to the general procedure B employing CdSe (7.5 mg, 10% w/w), K<sub>2</sub>CO<sub>3</sub> (103.5 mg, 0.75 mmol), *N*-(4-bromophenyl)-*N*-methylmethacrylamide (75.9 mg, 0.30 mmol), CF<sub>3</sub>SO<sub>2</sub>Cl (64 μL, 0.60 mmol) and CH<sub>3</sub>CN (0.1 M, 3 mL) for 14 h. The product was purified by column chromatography (silica gel, gradient 5 to 10% EA/petroleum ether). Yield: 72% (69.3 mg).

**<sup>1</sup>H NMR (400 MHz, CDCl<sub>3</sub>)** δ 7.41 (dd, *J* = 8.3, 2.0 Hz, 1H), 7.36 (s, 1H), 6.75 (d, *J* = 8.3 Hz, 1H), 3.20 (s, 3H), 2.81 (dq, *J* = 15.2, 10.7, 1.4 Hz, 1H), 2.61 (dq, *J* = 15.2, 10.4 Hz, 1H), 1.38 (s, 3H). **<sup>13</sup>C NMR (101 MHz, CDCl<sub>3</sub>)** δ 177.90, 142.03, 133.14, 131.51, 126.90, 125.15 (q, *J*<sub>C-F</sub> = 278.3 Hz), 115.39, 110.03, 44.62 (d, *J*<sub>C-F</sub> = 2.4 Hz), 40.65 (q, *J*<sub>C-F</sub> = 28.5 Hz), 26.62, 25.02. **<sup>19</sup>F NMR (377 MHz, CDCl<sub>3</sub>)** δ – 61.95 (t, *J* = 10.4 Hz). **GCMS (EI)** *m/z* calcd. for C<sub>12</sub>H<sub>11</sub>BrF<sub>3</sub>NO [M<sup>+</sup>] 321.0, found 323.0, 321.0, 308.0, 306.0, 288.0, 286.0, 240.0, 238.0, 208.0, 191.1, 159.1, 130.1, 115.1, 102.1, 89.1. The analytical data correspond with those reported in the literature.<sup>11</sup>

### 1-Ethyl-3-methyl-3-(2,2,2-trifluoroethyl)indolin-2-one (34)

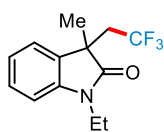

The title compound was synthesized according to the general procedure B employing CdSe (5.6 mg, 10% w/w), K<sub>2</sub>CO<sub>3</sub> (103.5 mg, 0.75 mmol), *N*-ethyl-*N*-phenylmethacrylamide (56.7 mg, 0.30 mmol), CF<sub>3</sub>SO<sub>2</sub>Cl (64 μL, 0.60 mmol) and CH<sub>3</sub>CN (0.1 M, 3 mL) for 14 h. The product was purified by column chromatography (silica gel, gradient 5 to 10% EA/petroleum ether). Yield: 90% (69.4 mg).

**<sup>1</sup>H NMR (400 MHz, CDCl<sub>3</sub>)** δ 7.29 (t, *J* = 7.8 Hz, 1H), 7.25 (d, *J* = 6.8 Hz, 1H), 7.07 (t, *J* = 7.3 Hz, 1H), 6.89 (d, *J* = 7.8 Hz, 1H), 3.87 (dq, *J* = 14.5, 7.3 Hz, 1H), 3.68 (dq, *J* = 14.2, 7.2 Hz, 1H), 2.84 (dq, *J* = 15.2, 10.7 Hz, 1H), 2.63 (dq, *J* = 15.1, 10.4 Hz, 1H), 1.39 (s, 3H), 1.24 (t, *J* = 7.2 Hz, 3H). **<sup>13</sup>C NMR (101 MHz, CDCl<sub>3</sub>)** δ 178.18, 142.00, 131.32, 128.54, 125.36 (q, *J*<sub>C-F</sub> = 278.2 Hz), 123.80, 122.49, 108.71, 44.39 (d, *J*<sub>C-F</sub> = 2.6 Hz), 40.76 (q, *J*<sub>C-F</sub> = 28.2 Hz), 34.87, 25.22, 12.34. **<sup>19</sup>F NMR (377 MHz, CDCl<sub>3</sub>)** δ – 61.93 (t, *J* = 9.8 Hz). **GCMS (EI)** *m/z* calcd. for C<sub>13</sub>H<sub>14</sub>F<sub>3</sub>NO [M<sup>+</sup>] 257.1, found 257.1, 242.1, 222.1, 214.1, 194.1, 174.1, 146.1, 144.1, 130.1, 128.1, 117.1, 103.1, 89.1, 77.1. The analytical data correspond with those reported in the literature.<sup>11</sup>

### 3-Methyl-1-phenyl-3-(2,2,2-trifluoroethyl)indolin-2-one (35)

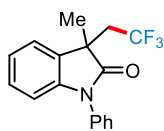

The title compound was synthesized according to the general procedure B employing CdSe (7.1 mg, 10% w/w), K<sub>2</sub>CO<sub>3</sub> (103.5 mg, 0.75 mmol), *N,N*-diphenylmethacrylamide (71.1 mg, 0.30 mmol), CF<sub>3</sub>SO<sub>2</sub>Cl (64 μL, 0.60 mmol) and CH<sub>3</sub>CN (0.1 M, 3 mL) for 14 h. The product was purified by column chromatography (silica gel, gradient 5 to 10% EA/petroleum ether). Yield: 86% (78.7 mg).

**<sup>1</sup>H NMR (400 MHz, CDCl<sub>3</sub>)** δ 7.54 (t, *J* = 7.6 Hz, 2H), 7.46 – 7.38 (m, 3H), 7.33 (d, *J* = 7.4 Hz, 1H), 7.24 (t, *J* = 7.5 Hz, 1H), 7.13 (t, *J* = 7.5 Hz, 1H), 6.85 (d, *J* = 7.9 Hz, 1H), 2.98 (dq, *J* = 15.2, 10.7 Hz, 1H), 2.74 (dq, *J* = 15.2, 10.4 Hz, 1H), 1.54 (s, 3H). **<sup>13</sup>C NMR (101 MHz, CDCl<sub>3</sub>)** δ 178.07, 143.02, 134.43, 130.76, 129.76, 128.54, 128.35, 126.70, 125.41 (q, *J*<sub>C-F</sub> = 278.3 Hz), 123.85, 123.16, 109.85, 44.60 (d, *J*<sub>C-F</sub> = 2.4 Hz), 41.15 (q, *J*<sub>C-F</sub> = 28.1 Hz), 25.54. **<sup>19</sup>F NMR (377 MHz, CDCl<sub>3</sub>)** δ – 61.83 (t, *J* = 10.4 Hz). **GCMS (EI)** *m/z* calcd. for C<sub>17</sub>H<sub>14</sub>F<sub>3</sub>NO [M<sup>+</sup>] 305.1, found 305.1, 290.1, 270.1, 242.1, 222.1, 200.1, 194.1, 180.1, 167.1, 152.2, 130.1, 117.1, 96.1. The analytical data correspond with those reported in the literature.<sup>11</sup>

### 1-Methyl-1-(2,2,2-trifluoroethyl)-5,6-dihydro-4*H*-pyrrolo[3,2,1-*ij*]quinolin-2(1*H*)-one (36)

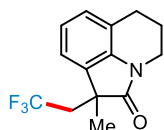

The title compound was synthesized according to the general procedure B employing CdSe (6.0 mg, 10% w/w), K<sub>2</sub>CO<sub>3</sub> (103.5 mg, 0.75 mmol), 1-(3,4-dihydroquinolin-1(2*H*)-yl)-2-methylprop-2-en-1-one (60.3 mg, 0.30 mmol), CF<sub>3</sub>SO<sub>2</sub>Cl (64 μL, 0.60 mmol) and CH<sub>3</sub>CN (0.1 M, 3 mL) for 14 h. The product was purified by column chromatography (silica gel, gradient 10 to 15% EA/petroleum ether). Yield: 88% (71 mg).

**<sup>1</sup>H NMR (400 MHz, CDCl<sub>3</sub>)** δ 7.10 (d, *J* = 7.4 Hz, 1H), 7.05 (d, *J* = 7.6 Hz, 1H), 6.96 (t, *J* = 7.5 Hz, 1H), 3.79 – 3.66 (m, 2H), 2.90 – 2.56 (m, 4H), 2.00 (p, *J* = 6.0 Hz, 2H), 1.41 (s, 3H). **<sup>13</sup>C NMR (101 MHz, CDCl<sub>3</sub>)** δ 177.43, 138.70, 129.77, 127.36, 125.51 (q, *J*<sub>C-F</sub> = 278.1 Hz), 122.16, 121.54, 120.59, 45.72 (d, *J*<sub>C-F</sub> = 2.6 Hz), 40.55 (q, *J*<sub>C-F</sub> = 28.3 Hz), 39.13, 24.69, 24.64, 21.21. **<sup>19</sup>F NMR (377 MHz, CDCl<sub>3</sub>)** δ – 61.81 (t, *J* = 11.8 Hz). **GCMS (EI)** *m/z* calcd. for C<sub>14</sub>H<sub>14</sub>F<sub>3</sub>NO [M<sup>+</sup>] 269.1, found 269.1, 254.1, 234.1, 206.1, 200.1, 186.1, 158.1, 144.1, 130.1, 115.1, 103.0, 92.6, 77.1. The analytical data correspond with those reported in the literature.<sup>11</sup>

### (*E*)-1-Methoxy-4-(3,3,3-trifluoroprop-1-en-1-yl)benzene (37)

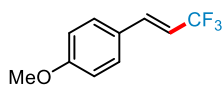

The title compound was synthesized according to the general procedure C employing CdSe (5.3 mg, 10% w/w), K<sub>2</sub>HPO<sub>4</sub> (130.5 mg, 0.75 mmol), (*E*)-3-(4-methoxyphenyl)acrylic acid (53.4 mg, 0.30 mmol), CF<sub>3</sub>SO<sub>2</sub>Cl (96 μL, 0.90 mmol), and CH<sub>3</sub>CN (0.1 M, 3 mL) for 28 h. The product was purified by column chromatography (silica gel, gradient 100% petroleum ether). Yield = 69% (41.8 mg).

**<sup>1</sup>H NMR (400 MHz, CDCl<sub>3</sub>)** δ 7.40 (d, *J* = 8.7 Hz, 2H), 7.09 (dd, *J* = 16.1, 2.3 Hz, 1H), 6.91 (d, *J* = 8.7 Hz, 2H), 6.07 (dq, *J* = 16.1, 6.6 Hz, 1H), 3.84 (s, 3H). **<sup>13</sup>C NMR (101 MHz, CDCl<sub>3</sub>)** δ 161.18, 137.24 (q, *J*<sub>C-F</sub> = 6.8 Hz), 129.16, 126.18, 124.08 (q, *J*<sub>C-F</sub> = 268.6 Hz), 114.44, 113.50 (q, *J*<sub>C-F</sub> = 33.6 Hz), 55.46. **<sup>19</sup>F NMR (377 MHz, CDCl<sub>3</sub>)** δ – 62.83 (d, *J* = 5.6 Hz). **GCMS (EI)** *m/z*



calcd. for C<sub>10</sub>H<sub>9</sub>F<sub>3</sub>O [M<sup>+</sup>] 202.1, found 202.1, 187.0, 183.1, 159.1, 151.1, 139.0, 133.1, 119.0, 109.1, 89.1, 83.1, 75.1, 63.1. The analytical data correspond with those reported in the literature.<sup>12</sup>

**(E)-1-Methyl-4-(3,3,3-trifluoroprop-1-en-1-yl)benzene (38)**

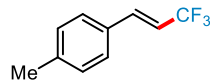

The title compound was synthesized according to the general procedure C employing CdSe (4.8 mg, 10% w/w), K<sub>2</sub>HPO<sub>4</sub> (130.5 mg, 0.75 mmol), (*E*)-3-(*p*-tolyl)acrylic acid (48.6 mg, 0.30 mmol), CF<sub>3</sub>SO<sub>2</sub>Cl (96 μL, 0.90 mmol), and CH<sub>3</sub>CN (0.1 M, 3 mL) for 28 h. The product was purified by column chromatography (silica gel, gradient 100% petroleum ether). Yield = 58% (32.3 mg).

**<sup>1</sup>H NMR (400 MHz, CDCl<sub>3</sub>)** δ 7.35 (d, *J* = 7.9 Hz, 2H), 7.20 (d, *J* = 7.9 Hz, 2H), 7.12 (dd, *J* = 16.1, 2.2 Hz, 1H), 6.15 (dq, *J* = 16.1, 6.6 Hz, 1H), 2.38 (s, 3H). **<sup>13</sup>C NMR (101 MHz, CDCl<sub>3</sub>)** δ 140.43, 137.67 (q, *J*<sub>C-F</sub> = 6.8 Hz), 130.78, 129.77, 127.61, 123.92 (q, *J*<sub>C-F</sub> = 268.6 Hz), 114.89 (q, *J*<sub>C-F</sub> = 33.6 Hz), 21.53. **<sup>19</sup>F NMR (377 MHz, CDCl<sub>3</sub>)** δ –63.11. **GCMS (EI)** *m/z* calcd. for C<sub>10</sub>H<sub>9</sub>F<sub>3</sub> [M<sup>+</sup>] 186.1, found 186.1, 167.1, 151.0, 133.1, 117.1, 115.1, 91.1, 77.1, 69.0, 63.1. The analytical data correspond with those reported in the literature.<sup>12</sup>

**(E)-1,2-Dimethoxy-4-(3,3,3-trifluoroprop-1-en-1-yl)benzene (39)**

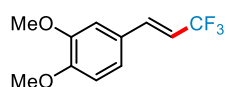

The title compound was synthesized according to the general procedure C employing CdSe (6.2 mg, 10% w/w), K<sub>2</sub>HPO<sub>4</sub> (130.5 mg, 0.75 mmol), (*E*)-3-(3,4-dimethoxyphenyl)acrylic acid (62.4 mg, 0.30 mmol), CF<sub>3</sub>SO<sub>2</sub>Cl (96 μL, 0.90 mmol), and CH<sub>3</sub>CN (0.1 M, 3 mL) for 28 h. The product was purified by column chromatography (silica gel, gradient 5 to 8% diethyl ether/petroleum ether). Yield = 72% (50.1 mg).

**<sup>1</sup>H NMR (400 MHz, CDCl<sub>3</sub>)** δ 7.07 (dd, *J* = 16.1, 2.2 Hz, 1H), 7.01 (dd, *J* = 8.3, 2.0 Hz, 1H), 6.95 (d, *J* = 2.0 Hz, 1H), 6.85 (d, *J* = 8.3 Hz, 1H), 6.06 (dq, *J* = 16.0, 6.5 Hz, 1H), 3.90 (d, *J* = 2.7 Hz, 6H). **<sup>13</sup>C NMR (101 MHz, CDCl<sub>3</sub>)** δ 150.82, 149.32, 137.49 (q, *J*<sub>C-F</sub> = 6.8 Hz), 126.38, 123.99 (q, *J*<sub>C-F</sub> = 268.6 Hz), 121.71, 113.67 (q, *J*<sub>C-F</sub> = 33.8 Hz), 111.12, 109.39, 56.00, 55.96. **<sup>19</sup>F NMR (377 MHz, CDCl<sub>3</sub>)** δ –62.81 (d, *J* = 4.6 Hz). **GCMS (EI)** *m/z* calcd. for C<sub>11</sub>H<sub>11</sub>F<sub>3</sub>O<sub>2</sub> [M<sup>+</sup>] 232.1, found 232.1, 217.1, 213.1, 189.1, 174.0, 169.1, 149.0, 145.0, 139.1, 125.0, 121.1, 109.1, 101.1, 96.1, 77.1. The analytical data correspond with those reported in the literature.<sup>12</sup>

**(E)-5-(3,3,3-Trifluoroprop-1-en-1-yl)benzo[d][1,3]dioxole (40)**

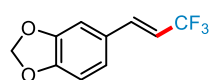

The title compound was synthesized according to the general procedure C employing CdSe (5.7 mg, 10% w/w), K<sub>2</sub>HPO<sub>4</sub> (130.5 mg, 0.75 mmol), (*E*)-3-(benzo[d][1,3]dioxol-5-yl)acrylic acid (57.6 mg, 0.30 mmol), CF<sub>3</sub>SO<sub>2</sub>Cl (96 μL, 0.90 mmol), and CH<sub>3</sub>CN (0.1 M, 3 mL) for 28 h. The product was purified by column chromatography (silica gel, gradient 5 to 8% diethyl ether/petroleum ether). Yield = 70% (45.3 mg).

**<sup>1</sup>H NMR (400 MHz, CDCl<sub>3</sub>)** δ 7.04 (d, *J* = 17.6 Hz, 1H), 6.95 (s, 1H), 6.92 (d, *J* = 8.2 Hz, 1H), 6.81 (d, *J* = 8.0 Hz, 1H), 6.14–5.96 (m, 1H), 6.01 (s, 2H). **<sup>13</sup>C NMR (101 MHz, CDCl<sub>3</sub>)** δ 149.40,

148.52, 137.36 (q,  $J_{\text{C-F}} = 6.8$  Hz), 127.85, 123.94 (q,  $J_{\text{C-F}} = 268.7$  Hz), 123.55, 113.97 (q,  $J_{\text{C-F}} = 33.7$  Hz), 108.64, 106.30, 101.69.  **$^{19}\text{F}$  NMR (377 MHz,  $\text{CDCl}_3$ )**  $\delta$  – 62.91. **GCMS (EI)**  $m/z$  calcd. for  $\text{C}_{10}\text{H}_7\text{F}_3\text{O}_2$  [ $\text{M}^+$ ] 216.0, found 216.1, 215.1, 197.1, 167.0, 157.0, 145.0, 139.1, 132.0, 127.1, 119.1, 114.1, 107.1, 91.1, 89.1, 63.1. The analytical data correspond with those reported in the literature.<sup>13</sup>

#### (E)-3-(3,3,3-Trifluoroprop-1-en-1-yl)phenol (41)

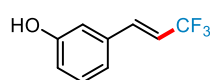

The title compound was synthesized according to the general procedure C employing CdSe (4.9 mg, 10% w/w),  $\text{K}_2\text{HPO}_4$  (130.5 mg, 0.75 mmol), (E)-3-(3-hydroxyphenyl)acrylic acid (49.2 mg, 0.30 mmol),  $\text{CF}_3\text{SO}_2\text{Cl}$  (96  $\mu\text{L}$ , 0.90 mmol), and  $\text{CH}_3\text{CN}$  (0.1 M, 3 mL) for 28 h. The product was purified by column chromatography (silica gel, gradient 3 to 6% DCM/petroleum ether). Yield = 55% (31 mg).

**$^1\text{H}$  NMR (400 MHz,  $\text{CDCl}_3$ )**  $\delta$  7.26 (t,  $J = 7.9$  Hz, 1H), 7.08 (dd,  $J = 16.1, 2.3$  Hz, 1H), 7.02 (d,  $J = 7.6$  Hz, 1H), 6.93 (s, 1H), 6.87 (dd,  $J = 8.1, 2.5$  Hz, 1H), 6.16 (dq,  $J = 16.1, 6.5$  Hz, 1H), 5.59 (broad, 1H).  **$^{13}\text{C}$  NMR (101 MHz,  $\text{CDCl}_3$ )**  $\delta$  156.19, 137.45 (q,  $J_{\text{C-F}} = 6.8$  Hz), 135.17, 130.31, 123.67 (q,  $J_{\text{C-F}} = 268.8$  Hz), 120.39, 117.25, 116.38 (q,  $J_{\text{C-F}} = 33.9$  Hz), 114.16.  **$^{19}\text{F}$  NMR (377 MHz,  $\text{CDCl}_3$ )**  $\delta$  – 63.37. **GCMS (EI)**  $m/z$  calcd. for  $\text{C}_9\text{H}_7\text{F}_3\text{O}$  [ $\text{M}^+$ ] 188.0, found 188.0, 167.0, 149.0, 140.0, 124.0, 119.0, 114.0, 109.1, 101.0, 96.0, 91.1, 75.0, 69.0, 65.1.

#### (E)-2-Methoxy-4-(3,3,3-trifluoroprop-1-en-1-yl)phenol (42)

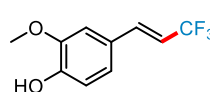

The title compound was synthesized according to the general procedure C employing CdSe (5.8 mg, 10% w/w),  $\text{K}_2\text{HPO}_4$  (130.5 mg, 0.75 mmol), (E)-3-(4-hydroxy-3-methoxyphenyl)acrylic acid (58.2 mg, 0.30 mmol),  $\text{CF}_3\text{SO}_2\text{Cl}$  (96  $\mu\text{L}$ , 0.90 mmol), and  $\text{CH}_3\text{CN}$  (0.1 M, 3 mL) for 28 h. The product was purified by column chromatography (silica gel, gradient 5 to 10% DCM/petroleum ether). Yield = 63% (41.2 mg).

**$^1\text{H}$  NMR (400 MHz,  $\text{CDCl}_3$ )**  $\delta$  7.06 (dd,  $J = 16.1, 2.3$  Hz, 1H), 7.02 – 6.89 (m, 3H), 6.05 (dq,  $J = 16.1, 6.6$  Hz, 1H), 5.86 (s, 1H), 3.93 (s, 3H).  **$^{13}\text{C}$  NMR (101 MHz,  $\text{CDCl}_3$ )**  $\delta$  147.62, 146.91, 137.64 (q,  $J_{\text{C-F}} = 6.8$  Hz), 126.03, 124.05 (q,  $J_{\text{C-F}} = 268.5$  Hz), 122.20, 114.84, 113.45 (q,  $J_{\text{C-F}} = 33.7$  Hz), 109.12, 56.07.  **$^{19}\text{F}$  NMR (377 MHz,  $\text{CDCl}_3$ )**  $\delta$  – 62.78 (d,  $J = 4.3$  Hz). **GCMS (EI)**  $m/z$  calcd. for  $\text{C}_{10}\text{H}_9\text{F}_3\text{O}_2$  [ $\text{M}^+$ ] 218.1, found 218.1, 203.0, 199.1, 175.0, 167.0, 155.1, 145.1, 139.0, 136.1, 133.0, 127.1, 125.0, 107.0, 101.0, 91.0, 77.0. The analytical data correspond with those reported in the literature.<sup>12</sup>

#### 1,3-Dimethyl-5-(trifluoromethyl)pyrimidine-2,4(1H,3H)-dione (43)

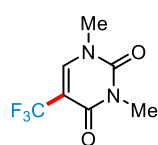

The title compound was synthesized according to the general procedure A employing CdSe (4.2 mg, 10% w/w),  $\text{K}_2\text{HPO}_4$  (130.5 mg, 0.75 mmol), 1,3-dimethylpyrimidine-2,4(1H,3H)-dione (42.0 mg, 0.30 mmol),  $\text{CF}_3\text{SO}_2\text{Cl}$  (64  $\mu\text{L}$ , 0.60 mmol), and  $\text{CH}_3\text{CN}$  (0.1 M, 3 mL) for 48 h. The product was purified by column chromatography (silica gel, gradient 10 to 15% diethyl ether/petroleum ether). Yield = 84% (52.4 mg).

**<sup>1</sup>H NMR (400 MHz, CDCl<sub>3</sub>)** δ 7.71 (d, *J* = 1.3 Hz, 1H), 3.47 (s, 3H), 3.32 (s, 3H). **<sup>13</sup>C NMR (101 MHz, CDCl<sub>3</sub>)** δ 158.84, 150.99, 143.87 (q, *J*<sub>C-F</sub> = 5.9 Hz), 122.13 (q, *J*<sub>C-F</sub> = 269.7 Hz), 103.95 (q, *J*<sub>C-F</sub> = 32.9 Hz), 37.79, 28.05. **<sup>19</sup>F NMR (377 MHz, CDCl<sub>3</sub>)** δ – 63.81. **GCMS (EI)** *m/z* calcd. for C<sub>7</sub>H<sub>7</sub>F<sub>3</sub>N<sub>2</sub>O<sub>2</sub> [M<sup>+</sup>] 208.0, found 208.1, 188.0, 179.0, 160.0, 150.0, 132.0, 123.0, 103.0, 91.0, 75.0, 60.0. The analytical data correspond with those reported in the literature.<sup>5</sup>

#### 2-(2-(Trifluoromethyl)-1H-indol-3-yl)acetic acid (44)

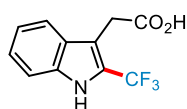

The title compound was synthesized according to the general procedure A employing CdSe (5.2 mg, 10% w/w), K<sub>2</sub>HPO<sub>4</sub> (130.5 mg, 0.75 mmol), 2-(1H-indol-3-yl)acetic acid (52.5 mg, 0.30 mmol), CF<sub>3</sub>SO<sub>2</sub>Cl (64 μL, 0.60 mmol), and CH<sub>3</sub>CN (0.1 M, 3 mL) for 3 h. The product was purified by column chromatography (silica gel, gradient 5 to 10% EA/petroleum ether). Yield = 70% (51 mg).

**<sup>1</sup>H NMR (400 MHz, DMSO-*d*<sub>6</sub>)** δ 12.42 (b, 1H), 12.08 (s, 1H), 7.68 (d, *J* = 8.0 Hz, 1H), 7.46 (d, *J* = 8.3 Hz, 1H), 7.29 (t, *J* = 7.6 Hz, 1H), 7.13 (t, *J* = 7.5 Hz, 1H), 3.83 (s, 2H). **<sup>13</sup>C NMR (101 MHz, DMSO-*d*<sub>6</sub>)** δ 171.95, 135.63, 126.89, 124.39, 122.17 (q, *J*<sub>C-F</sub> = 268.9 Hz), 121.67 (q, *J*<sub>C-F</sub> = 36.0 Hz), 120.18, 120.08, 112.24, 110.37 (d, *J*<sub>C-F</sub> = 3.0 Hz), 29.31. **<sup>19</sup>F NMR (377 MHz, DMSO-*d*<sub>6</sub>)** δ – 56.84. **GCMS (EI)** *m/z* calcd. for C<sub>11</sub>H<sub>8</sub>F<sub>3</sub>NO<sub>2</sub> [M<sup>+</sup>] 243.1, found 243.0, 198.1, 178.0, 158.0, 152.0, 128.0, 101.1, 89.0, 75.0.

#### 2-(2-(Trifluoromethyl)-1H-indol-3-yl)ethyl acetate (45)

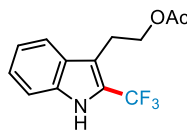

The title compound was synthesized according to the general procedure A employing CdSe (6.1 mg, 10% w/w), K<sub>2</sub>HPO<sub>4</sub> (130.5 mg, 0.75 mmol), 2-(1H-indol-3-yl)ethyl acetate (60.9 mg, 0.30 mmol), CF<sub>3</sub>SO<sub>2</sub>Cl (64 μL, 0.60 mmol), and CH<sub>3</sub>CN (0.1 M, 3 mL) for 3 h. The product was purified by column chromatography (silica gel, gradient 5 to 10% EA/petroleum ether). Yield = 79% (64.2 mg).

**<sup>1</sup>H NMR (400 MHz, CDCl<sub>3</sub>)** δ 8.62 (s, 1H), 7.71 (d, *J* = 8.1 Hz, 1H), 7.40 (d, *J* = 8.2 Hz, 1H), 7.33 (t, *J* = 7.5 Hz, 1H), 7.21 (t, *J* = 7.5 Hz, 1H), 4.34 (t, *J* = 6.9 Hz, 2H), 3.25 (td, *J* = 7.0, 1.5 Hz, 2H), 2.03 (s, 3H). **<sup>13</sup>C NMR (101 MHz, CDCl<sub>3</sub>)** δ 171.39, 135.39, 127.51, 125.01, 122.54 (q, *J*<sub>C-F</sub> = 36.9 Hz), 122.03 (q, *J*<sub>C-F</sub> = 240.7 Hz), 120.85, 120.21, 114.04 (d, *J*<sub>C-F</sub> = 3.1 Hz), 111.96, 64.26, 23.61, 21.03. **<sup>19</sup>F NMR (377 MHz, CDCl<sub>3</sub>)** δ – 58.27. **GCMS (EI)** *m/z* calcd. for C<sub>13</sub>H<sub>12</sub>F<sub>3</sub>NO<sub>2</sub> [M<sup>+</sup>] 271.1, found 271.1, 211.1, 198.1, 191.1, 178.1, 176.1, 172.1, 158.1, 152.1, 143.1, 140.1, 128.1, 115.1, 101.1, 89.1, 77.1.

#### *N*-(2-(2-(Trifluoromethyl)-1H-indol-3-yl)ethyl)acetamide (46)

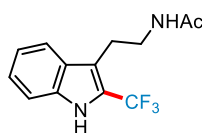

The title compound was synthesized according to the general procedure A employing CdSe (6.0 mg, 10% w/w), K<sub>2</sub>HPO<sub>4</sub> (130.5 mg, 0.75 mmol), *N*-(2-(1H-indol-3-yl)ethyl)acetamide (60.6 mg, 0.30 mmol), CF<sub>3</sub>SO<sub>2</sub>Cl (64 μL, 0.60 mmol), and CH<sub>3</sub>CN (0.1 M, 3 mL) for 3 h. The product was purified by column chromatography (silica gel, gradient 5 to 10% EA/petroleum ether). Yield = 65% (52.6 mg).



**<sup>1</sup>H NMR (400 MHz, DMSO-*d*<sub>6</sub>)** δ 11.93 (s, 1H), 7.98 (s, 1H), 7.69 (d, *J* = 8.1 Hz, 1H), 7.44 (d, *J* = 8.1 Hz, 1H), 7.28 (ddd, *J* = 8.2, 6.9, 1.1 Hz, 1H), 7.13 (ddd, *J* = 8.1, 6.9, 1.0 Hz, 1H), 3.24 (q, *J* = 6.7 Hz, 2H), 2.97 (d, *J* = 7.3 Hz, 2H), 1.76 (t, *J* = 1.5 Hz, 3H). **<sup>13</sup>C NMR (101 MHz, DMSO-*d*<sub>6</sub>)** δ 169.16, 135.74, 126.81, 124.29, 122.33 (q, *J*<sub>C-F</sub> = 220 Hz), 121.09 (q, *J*<sub>C-F</sub> = 36.1 Hz), 119.90, 114.54 (q, *J*<sub>C-F</sub> = 3.0 Hz), 112.32, 39.67, 23.93, 22.61. **<sup>19</sup>F NMR (377 MHz, DMSO-*d*<sub>6</sub>)** δ – 56.41. **GCMS (EI)** *m/z* calcd. for C<sub>13</sub>H<sub>13</sub>F<sub>3</sub>N<sub>2</sub>O [M<sup>+</sup>] 270.1, found 270.1, 211.1, 198.0, 189.1, 178.0, 176.0, 166.0, 158.0, 152.0, 128.1, 115.0, 101.1, 77.1, 72.1.

### 3-Hydroxy-4-methoxy-5-(trifluoromethyl)benzaldehyde (47)

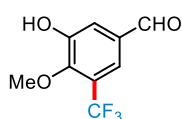

The title compound was synthesized according to the general procedure A employing CdSe (4.5 mg, 10% w/w), K<sub>2</sub>HPO<sub>4</sub> (130.5 mg, 0.75 mmol), 3-hydroxy-4-methoxybenzaldehyde (45.6 mg, 0.30 mmol), CF<sub>3</sub>SO<sub>2</sub>Cl (64 μL, 0.60 mmol), and CH<sub>3</sub>CN (0.1 M, 3 mL) for 48 h. The product was purified by column chromatography (silica gel, gradient 15 to 20% diethyl ether/petroleum ether). Yield = 61% (40.2 mg, 95:5, r.r., the product ratio was determined by <sup>19</sup>F NMR analysis).

**<sup>1</sup>H NMR (400 MHz, CDCl<sub>3</sub>)** δ 10.24 (q, *J* = 2.1 Hz, 1H), 7.64 (s, 1H), 7.29 (s, 1H), 6.31 (s, 1H), 4.01 (s, 3H). **<sup>13</sup>C NMR (101 MHz, CDCl<sub>3</sub>)** δ 187.99 (q, *J*<sub>C-F</sub> = 2.9 Hz), 150.34, 148.86, 127.26, 126.54 (q, *J*<sub>C-F</sub> = 33.0 Hz), 123.73 (q, *J*<sub>C-F</sub> = 274.0 Hz), 112.84 (q, *J*<sub>C-F</sub> = 5.9 Hz), 110.30, 56.60. **<sup>19</sup>F NMR (377 MHz, CDCl<sub>3</sub>)** δ – 56.84. **GCMS (EI)** *m/z* calcd. for C<sub>9</sub>H<sub>7</sub>F<sub>3</sub>O<sub>3</sub> [M<sup>+</sup>] 220.0, found 220.0, 219.0, 201.0, 191.0, 176.1, 149.0, 129.0, 120.0, 113.0, 101.0, 75.0, 51.0.

### 1,3,7-Trimethyl-8-(trifluoromethyl)-3,7-dihydro-1H-purine-2,6-dione (48)

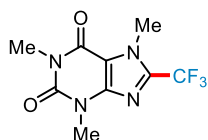

The title compound was synthesized according to the general procedure A employing CdSe (5.8 mg, 10% w/w), K<sub>2</sub>HPO<sub>4</sub> (130.5 mg, 0.75 mmol), caffeine (58.2 mg, 0.30 mmol), CF<sub>3</sub>SO<sub>2</sub>Cl (64 μL, 0.60 mmol), and CH<sub>3</sub>CN (0.1 M, 3 mL) for 48 h. The product was purified by column chromatography (silica gel, gradient 10 to 15% EA/petroleum ether). Yield = 78% (61.3 mg).

**<sup>1</sup>H NMR (400 MHz, CDCl<sub>3</sub>)** δ 4.13 (q, *J* = 1.3 Hz, 3H), 3.56 (s, 3H), 3.38 (s, 3H). **<sup>13</sup>C NMR (101 MHz, CDCl<sub>3</sub>)** δ 155.52, 151.40, 146.59, 138.98 (q, *J*<sub>C-F</sub> = 40.0 Hz), 118.27 (q, *J*<sub>C-F</sub> = 271.4 Hz), 109.72, 33.27 (d, *J*<sub>C-F</sub> = 2.2 Hz), 29.98, 28.27. **<sup>19</sup>F NMR (377 MHz, CDCl<sub>3</sub>)** δ – 62.43. **GCMS (EI)** *m/z* calcd. for C<sub>9</sub>H<sub>9</sub>F<sub>3</sub>N<sub>4</sub>O<sub>2</sub> [M<sup>+</sup>] 262.1, found 262.1, 243.1, 233.0, 204.0, 193.1, 177.0, 150.0, 108.1, 82.1, 67.0. The analytical data correspond with those reported in the literature.<sup>5</sup>

### 3,7-Dimethyl-1-(5-oxohexyl)-8-(trifluoromethyl)-3,7-dihydro-1H-purine-2,6-dione (49)

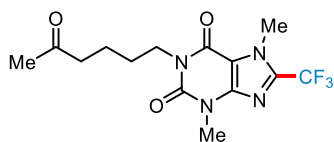

The title compound was synthesized according to the general procedure A employing CdSe (8.3 mg, 10% w/w), K<sub>2</sub>HPO<sub>4</sub> (130.5 mg, 0.75 mmol), pentoxifylline (83.4 mg, 0.30 mmol), CF<sub>3</sub>SO<sub>2</sub>Cl (64 μL, 0.60 mmol), and CH<sub>3</sub>CN (0.1 M, 3 mL) for 48 h. The product was purified by column chromatography (silica gel, gradient 15 to 20% EA/petroleum ether). Yield = 73% (75.7 mg).

**<sup>1</sup>H NMR (400 MHz, CDCl<sub>3</sub>)** δ 4.11 (d, *J* = 1.4 Hz, 3H), 4.01 – 3.93 (m, 2H), 3.53 (d, *J* = 1.4 Hz, 3H), 2.46 (t, *J* = 6.7 Hz, 2H), 2.10 (s, 3H), 1.64 – 1.57 (m, 4H). **<sup>13</sup>C NMR (101 MHz, CDCl<sub>3</sub>)** δ 208.63, 155.35, 151.11, 146.61, 138.96 (q, *J*<sub>C-F</sub> = 40.1 Hz), 118.25 (q, *J*<sub>C-F</sub> = 271.3 Hz), 109.74, 43.13, 41.18, 33.25 (d, *J*<sub>C-F</sub> = 2.2 Hz), 30.03, 29.89, 27.37, 20.94. **<sup>19</sup>F NMR (377 MHz, CDCl<sub>3</sub>)** δ – 62.44. **GCMS (EI)** *m/z* calcd. for C<sub>14</sub>H<sub>17</sub>F<sub>3</sub>N<sub>4</sub>O<sub>3</sub> [M<sup>+</sup>] 346.1, found 346.1, 327.1, 303.1, 289.1, 275.1, 261.0, 249.0, 231.0, 204.0, 177.0, 150.0, 110.0, 82.1, 67.0. The analytical data correspond with those reported in the literature.<sup>5</sup>

### (3,3,3-Trifluoroprop-1-ene-1,1-diyl)dibenzene

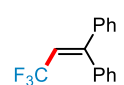

Yield = 81% (Yield was determined by <sup>19</sup>F NMR analysis of the crude mixture using trifluoromethylbenzene as an internal standard).

**<sup>1</sup>H NMR (400 MHz, CDCl<sub>3</sub>)** δ 7.48 – 7.33 (m, 6H), 7.33 – 7.25 (m, 4H), 6.17 (qd, *J* = 8.3, 1.6 Hz, 1H). **<sup>13</sup>C NMR (101 MHz, CDCl<sub>3</sub>)** δ 152.61 (q, *J*<sub>C-F</sub> = 5.6 Hz), 140.25, 137.40, 129.53, 129.25, 129.23, 128.61, 128.37, 128.17, 128.10, 127.30, 123.25 (q, *J*<sub>C-F</sub> = 270.5 Hz), 115.56 (q, *J*<sub>C-F</sub> = 33.8 Hz). **<sup>19</sup>F NMR (377 MHz, CDCl<sub>3</sub>)** δ – 55.50. **GCMS (EI)** *m/z* calcd. for C<sub>15</sub>H<sub>11</sub>F<sub>3</sub> [M<sup>+</sup>] 248.1, found 248.1, 227.0, 207.1, 196.1, 179.1, 165.1, 151.0, 139.0, 127.0, 114.0, 89.0, 76.0. The analytical data correspond with those reported in the literature.<sup>14</sup>

## REFERENCES

- (1) Lowry, M. S.; Goldsmith, J. I.; Slinker, J. D.; Rohl, R.; Pascal, R. A.; Malliaras, G. G.; Bernhard, S. Single-Layer Electroluminescent Devices and Photoinduced Hydrogen Production from an Ionic Iridium(III) Complex. *Chem. Mater.* **2005**, *17*, 5712–5719.
- (2) Muralirajan, K.; Kancherla, R.; Rueping, M. Dehydrogenative Aromatization and Sulfonylation of Pyrrolidines: Orthogonal Reactivity in Photoredox Catalysis. *Angew. Chem. Int. Ed.* **2018**, *57*, 14787–14791.
- (3) Pang, Y.; Lee, J. W.; Kubota, K.; Ito, H. Solid-State Radical C–H Trifluoromethylation Reactions Using Ball Milling and Piezoelectric Materials. *Angew. Chem. Int. Ed.* **2020**, *59*, 22570–22576.
- (4) Pitre, S. P.; Tiernan, C. D. M.; Ismaili, H.; Scaiano, J. C. Metal-Free Photocatalytic Radical Trifluoromethylation Utilizing Methylene Blue and Visible Light Irradiation. *ACS Catal.* **2014**, *4*, 2530–2535.
- (5) Ghosh, I.; Khamrai, J.; Savateev, A.; Shlapakov, N.; Antonietti, M.; König, B. Organic Semiconductor Photocatalyst can Bifunctionalize Arenes and Heteroarenes. *Science* **2019**, *365*, 360–366.
- (6) Nagib, D. A.; MacMillan, D. W. C. Trifluoromethylation of Arenes and Heteroarenes by Means of Photoredox Catalysis. *Nature* **2011**, *480*, 224–228.
- (7) Choi, W. J.; Choi, S.; Ohkubo, K.; Fukuzumi, S.; Cho, E. J.; You, Y. Mechanisms and Applications of Cyclometalated Pt(II) Complexes in Photoredox Catalytic Trifluoromethylation. *Chem. Sci.* **2015**, *6*, 1454–1464.

- (8) Ye, Y.; Cheung, K. P. S.; He, L.; Tsu, G. C. Synthesis of 2-(Trifluoromethyl)indoles via Domino Trifluoromethylation/Cyclization of 2-Alkynylanilines. *Org. Lett.* **2018**, *20*, 1676–1679.
- (9) Chen, Y.; Wang, Y.; Sun, Z.; Ma, D. Elaboration of 2-(Trifluoromethyl)indoles via a Cascade Coupling/Condensation/Deacylation Process. *Org. Lett.* **2008**, *10*, 625–628.
- (10) Seo, S.; Taylor, J. B.; Greaney, M. F. Silver-Catalysed Trifluoromethylation of Arenes at Room Temperature. *Chem. Commun.* **2013**, *49*, 6385–6387.
- (11) Guo, J.; Xu, C.; Wang, L.; Huang, W.; Wang, M. Catalyst-Free and Selective Trifluoromethylative Cyclization of Acryloanilides using  $\text{PhICF}_3\text{Cl}$ . *Org. Biomol. Chem.* **2019**, *17*, 4593–4599.
- (12) Xu, P.; Abdukader, A.; Hu, K.; Cheng, Y.; Zhu, C. Room Temperature Decarboxylative Trifluoromethylation of  $\alpha,\beta$ -Unsaturated Carboxylic Acids by Photoredox Catalysis. *Chem. Commun.* **2014**, *50*, 2308–2310.
- (13) Hong, H.; Li, Y.; Chen, L.; Li, B.; Zhu, Z.; Chen, X.; Chen, L.; Huang, Y. Electrochemical Synthesis Strategy for  $\text{C}_{\text{vinyl}}\text{-CF}_3$  Compounds through Decarboxylative Trifluoromethylation. *J. Org. Chem.* **2019**, *84*, 5980–5986.
- (14) Huang, B.; Bu, X.-S.; Xu, J.; Dai, J.-J.; Feng, Y.-S.; Xu, H.-J. Metal-Free, Visible-Light-Mediated Direct C–H Trifluoromethylation of Hydrazones with NADH Coenzyme Model Catalyst. *Asian J. Org. Chem.* **2018**, *7*, 137–140.

## NMR Spectra

$^1\text{H}$ ,  $^{13}\text{C}$  and  $^{19}\text{F}$  NMR spectra are included below for all isolated compounds.

### Methyl 5-(trifluoromethyl)-1*H*-pyrrole-2-carboxylate (1)

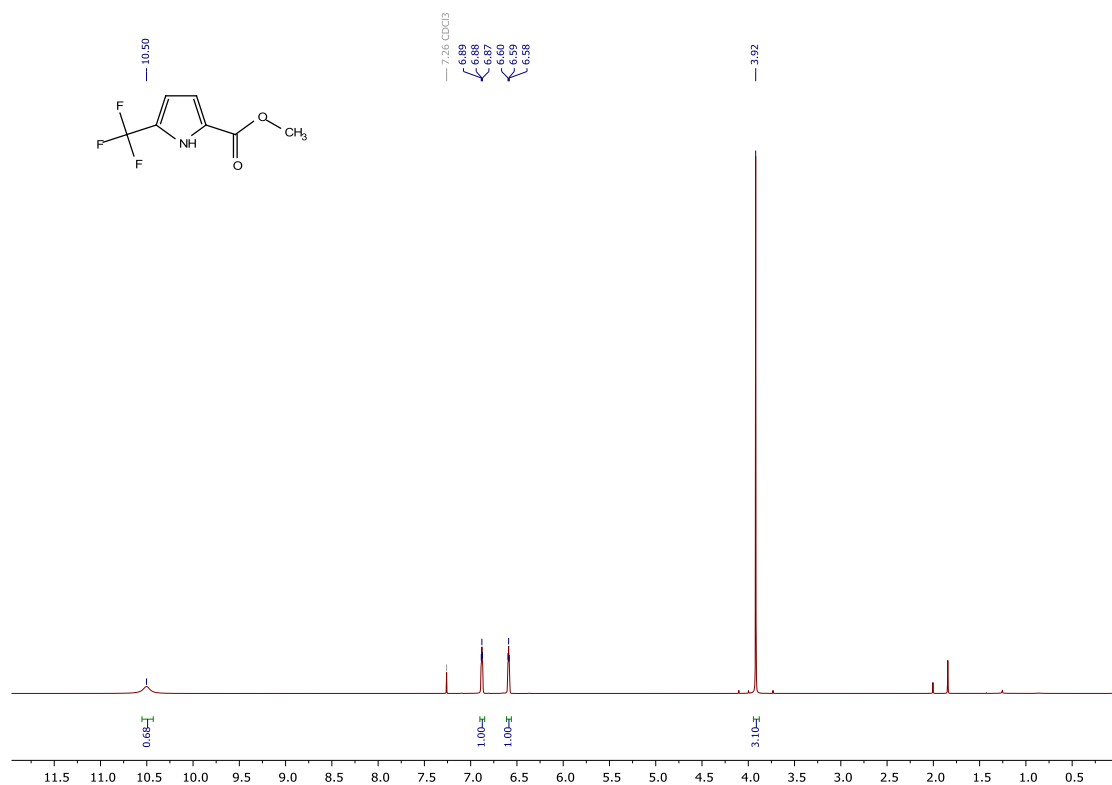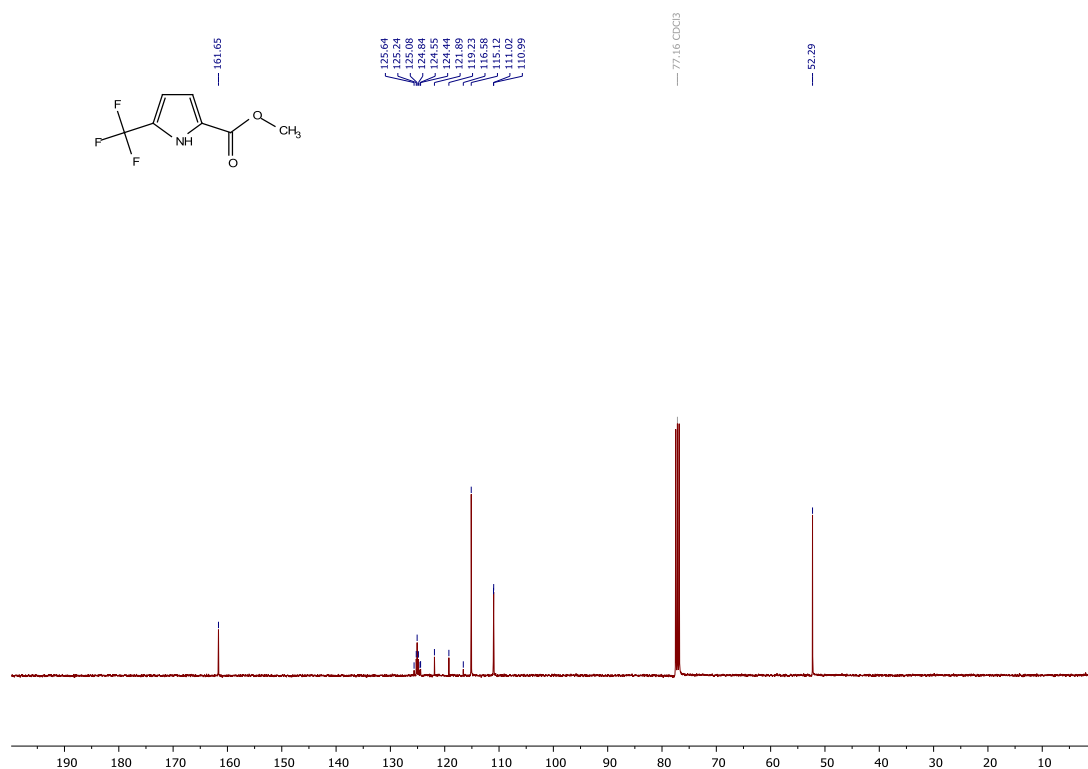

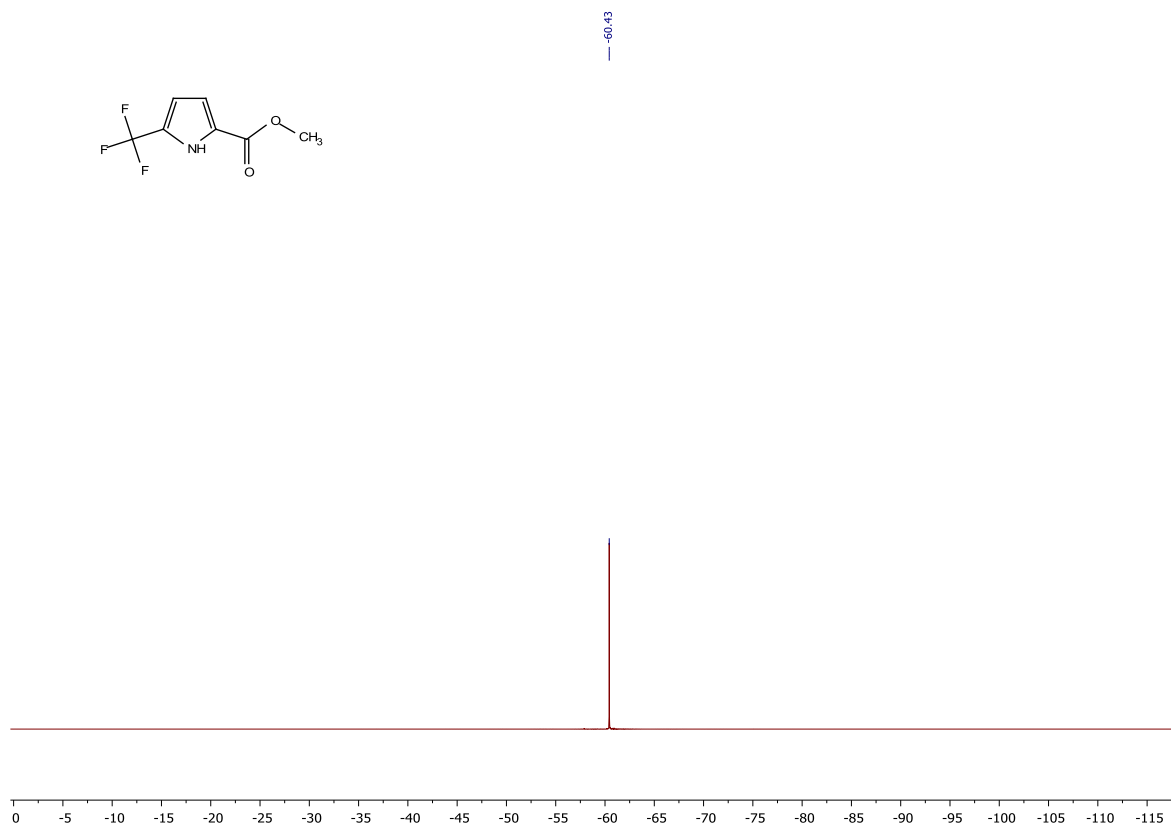

## 5-(Trifluoromethyl)-1H-pyrrole-2-carbaldehyde (2)

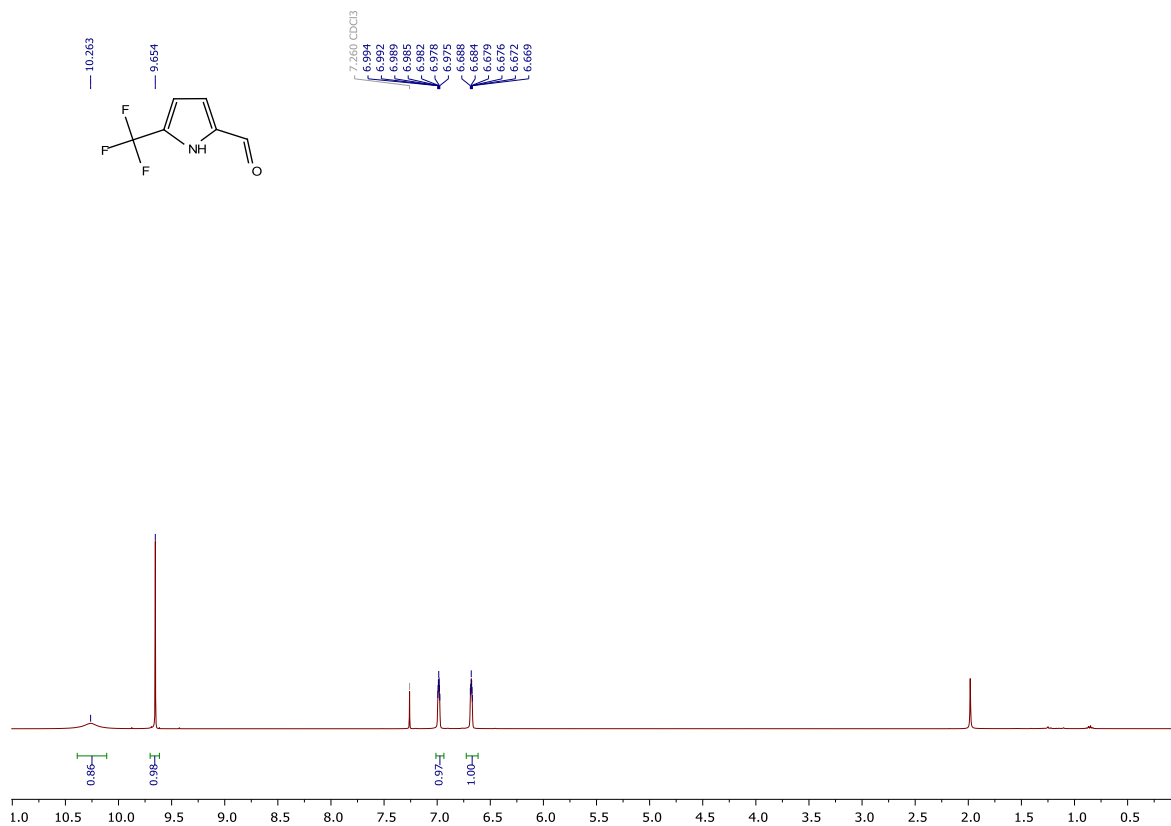

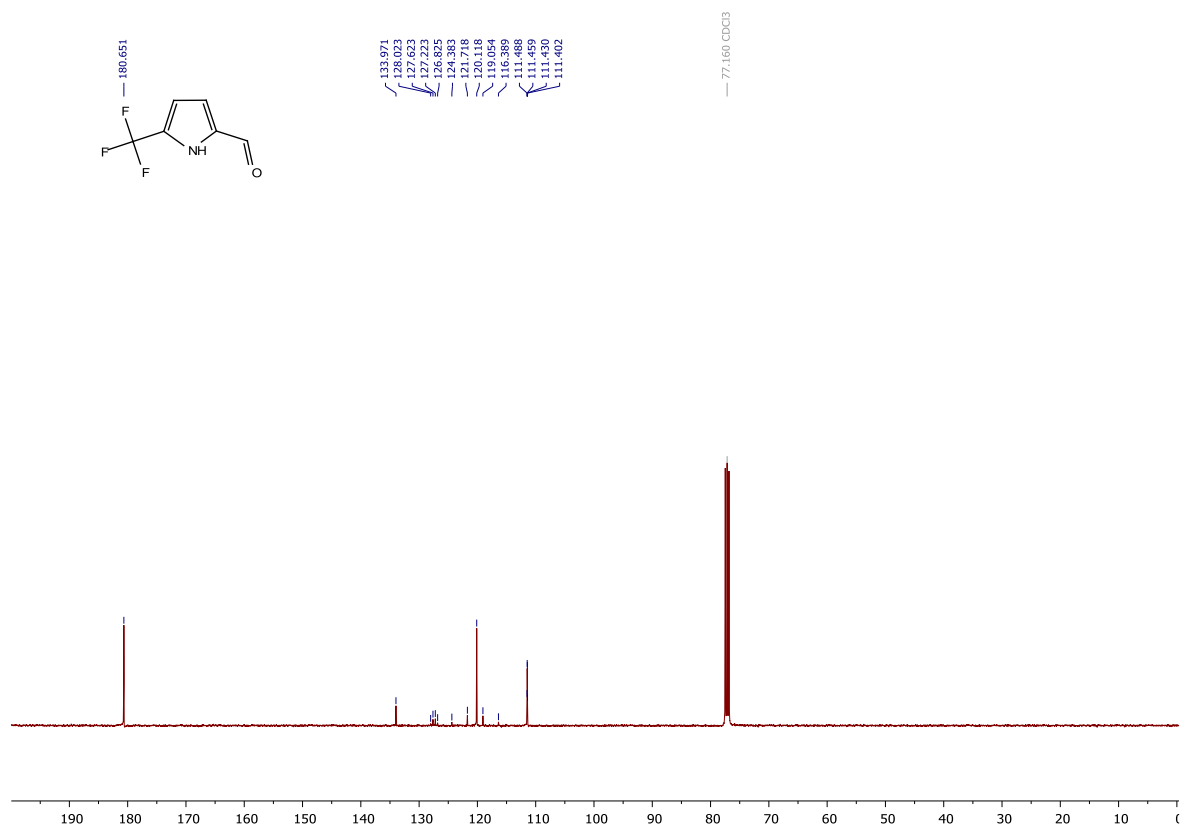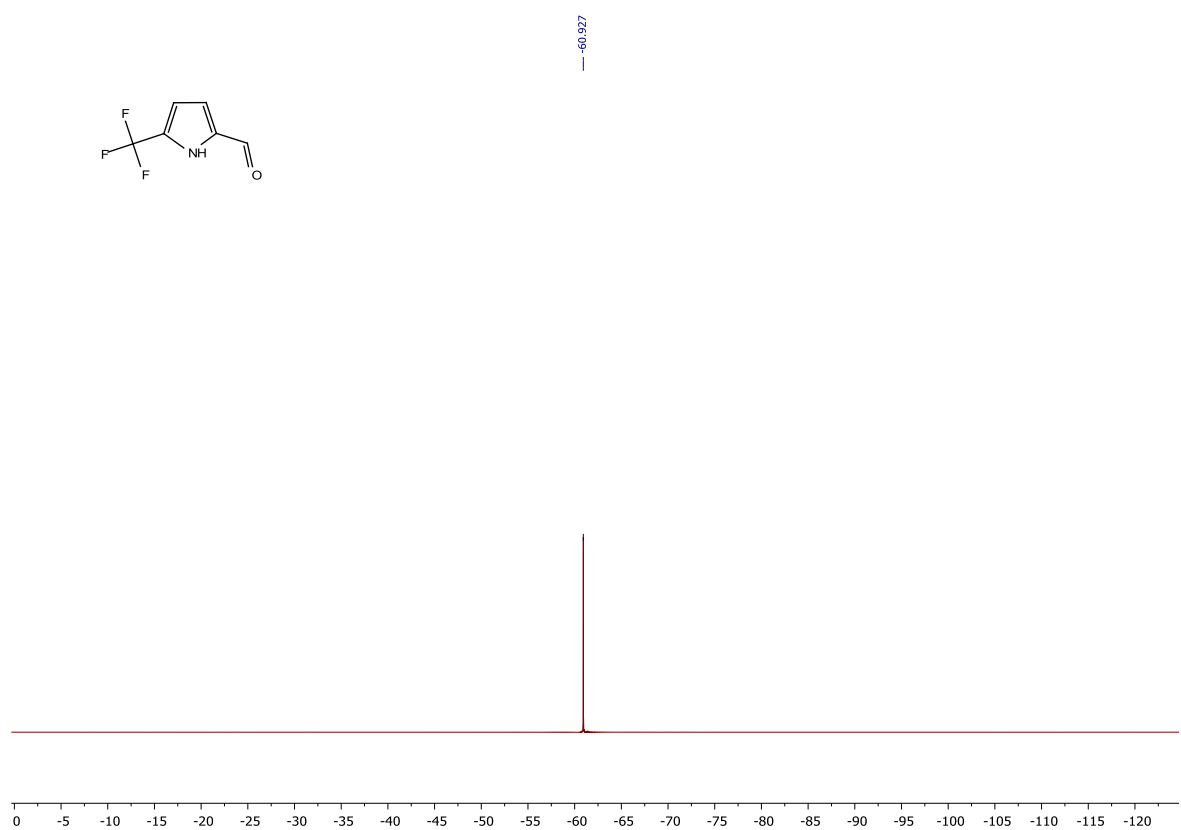

# 5-(Trifluoromethyl)-1H-pyrrole-2-carbonitrile (3)

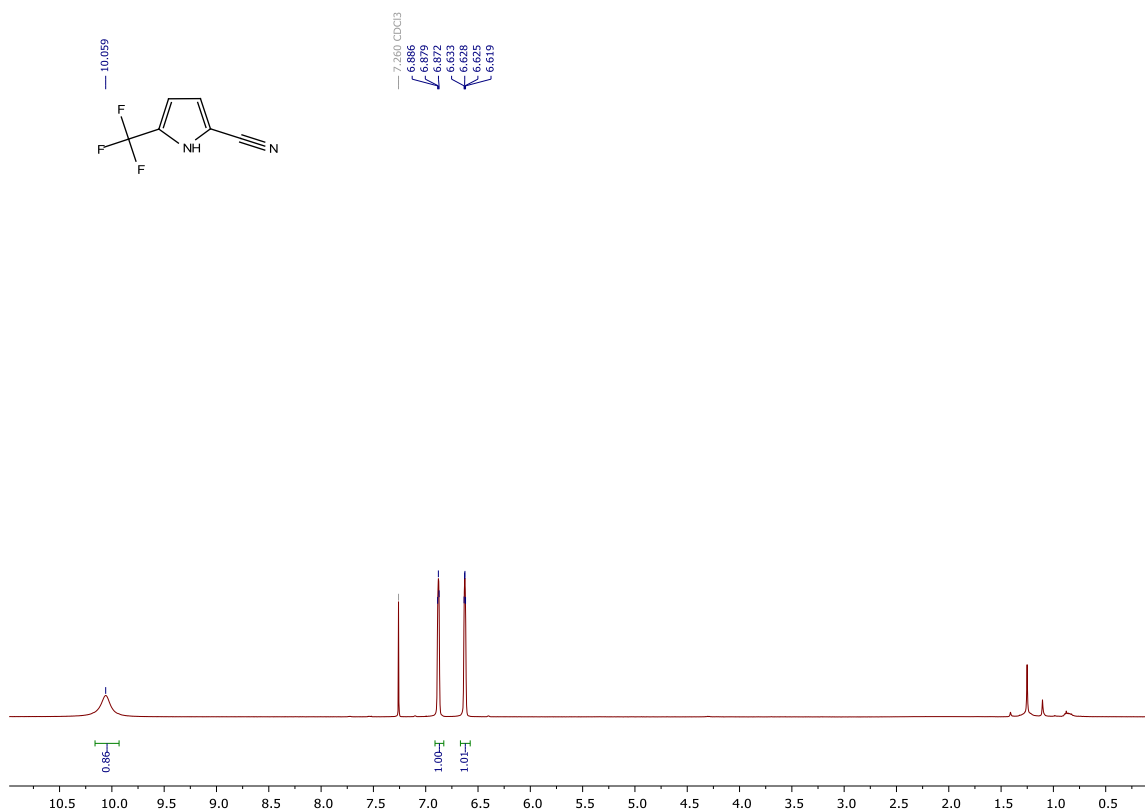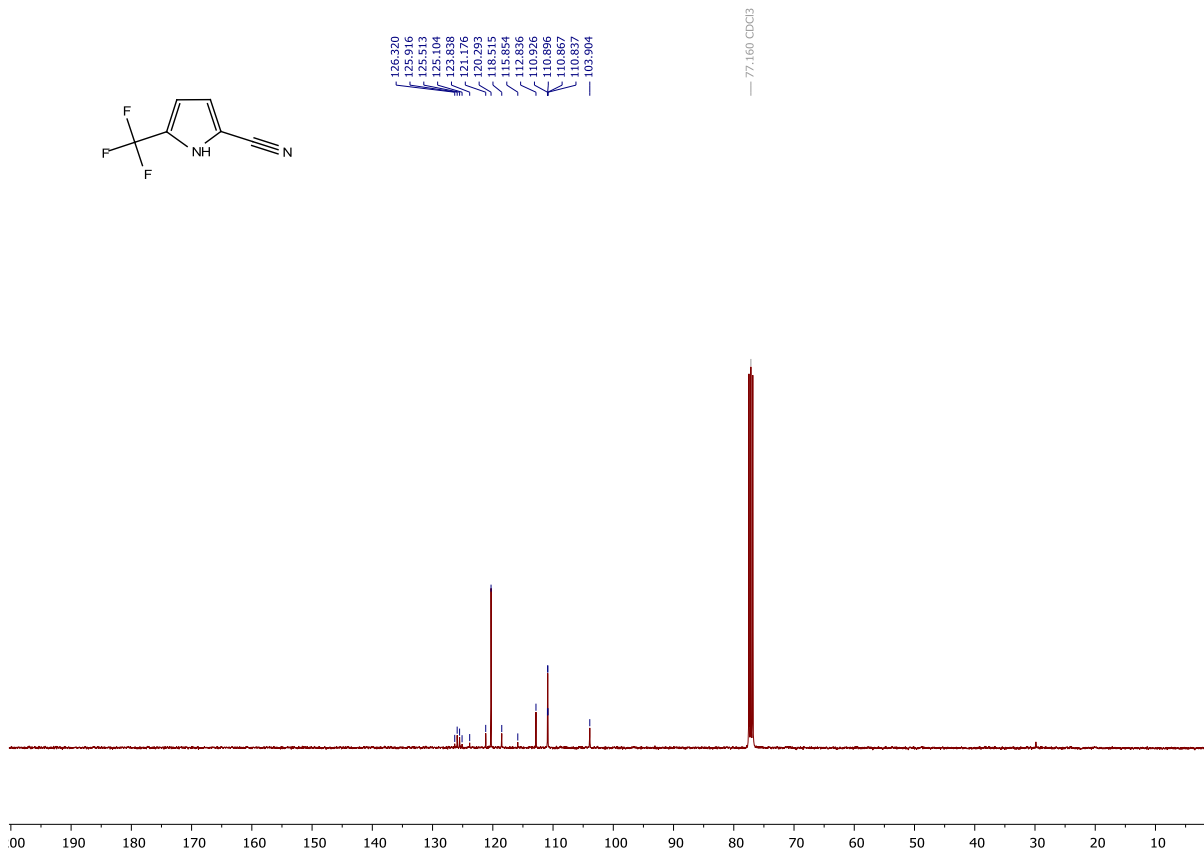

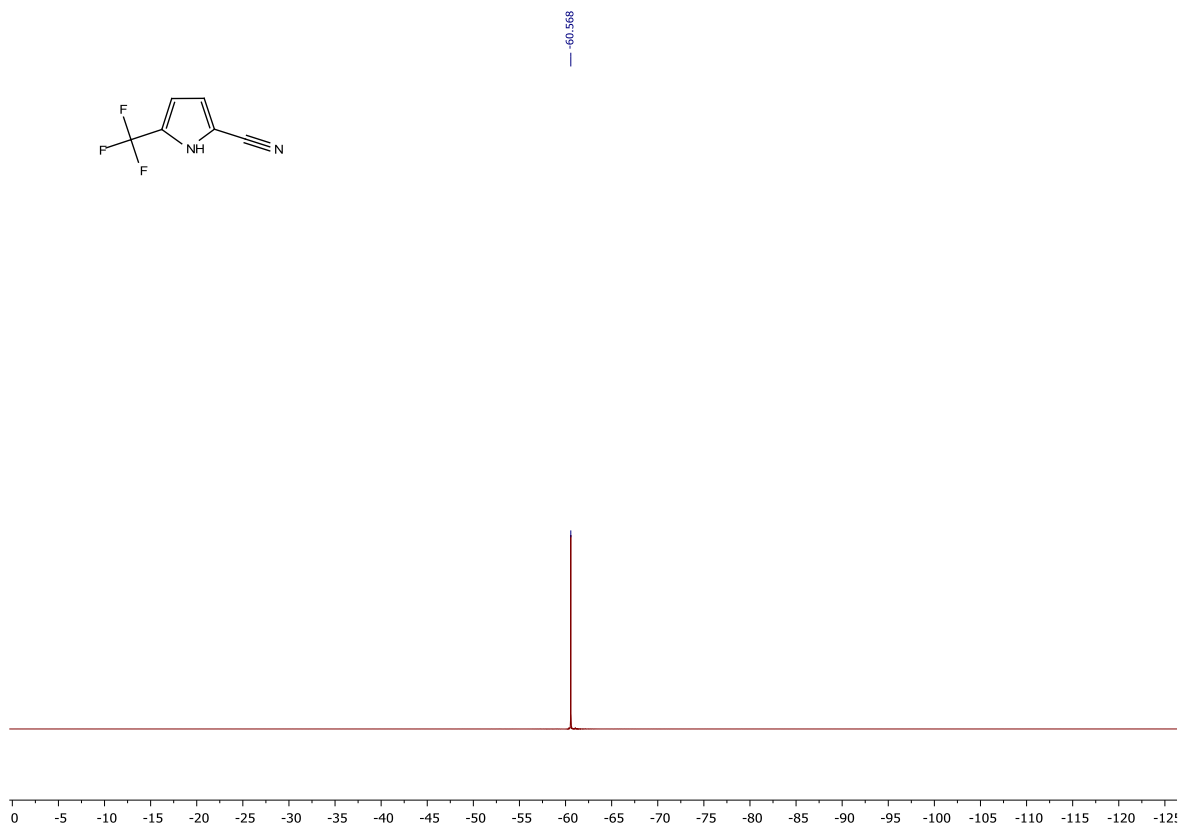

***tert*-Butyl 2-(trifluoromethyl)-1*H*-pyrrole-1-carboxylate (4)**

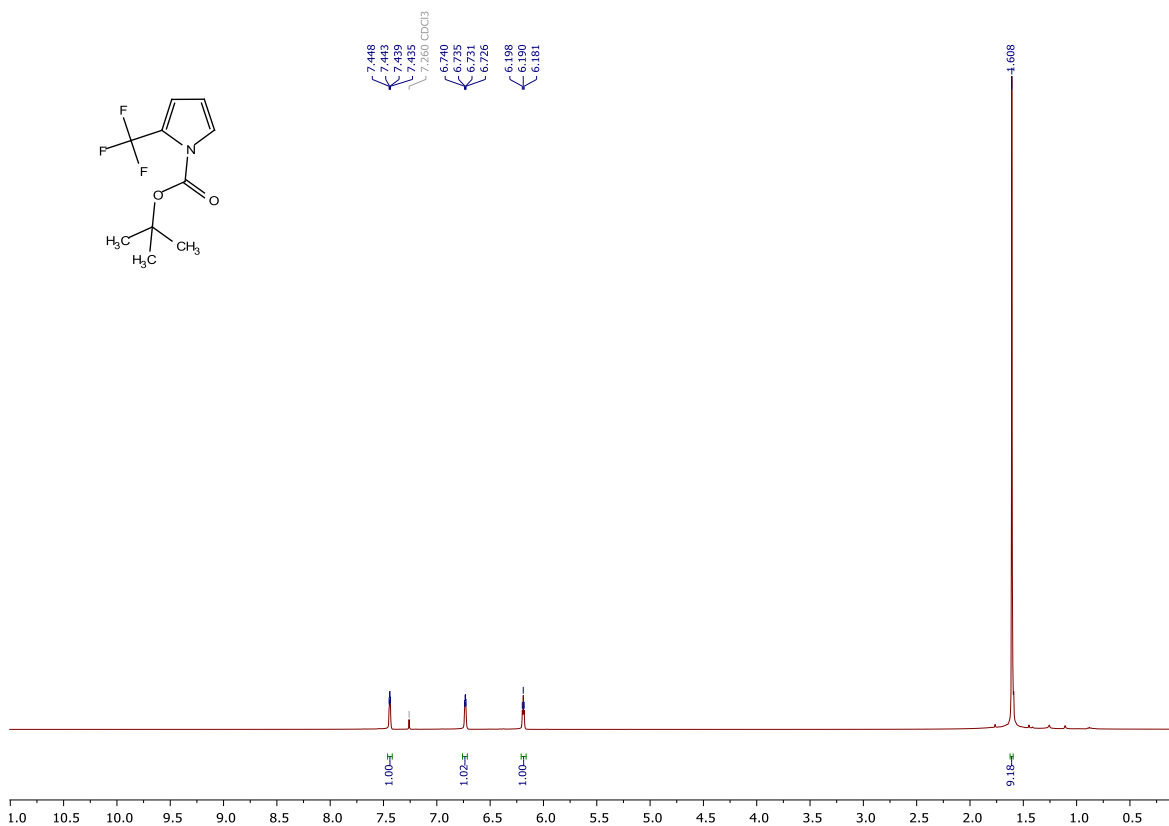



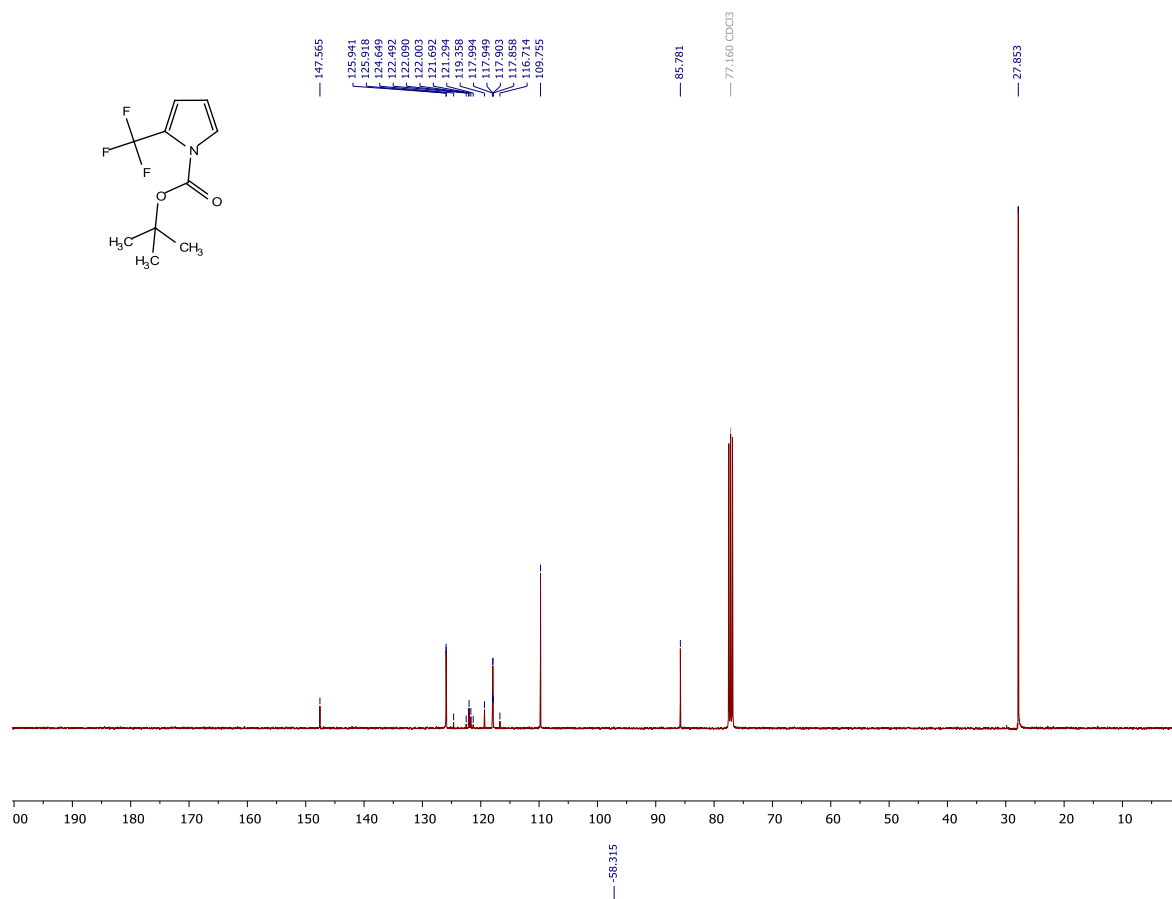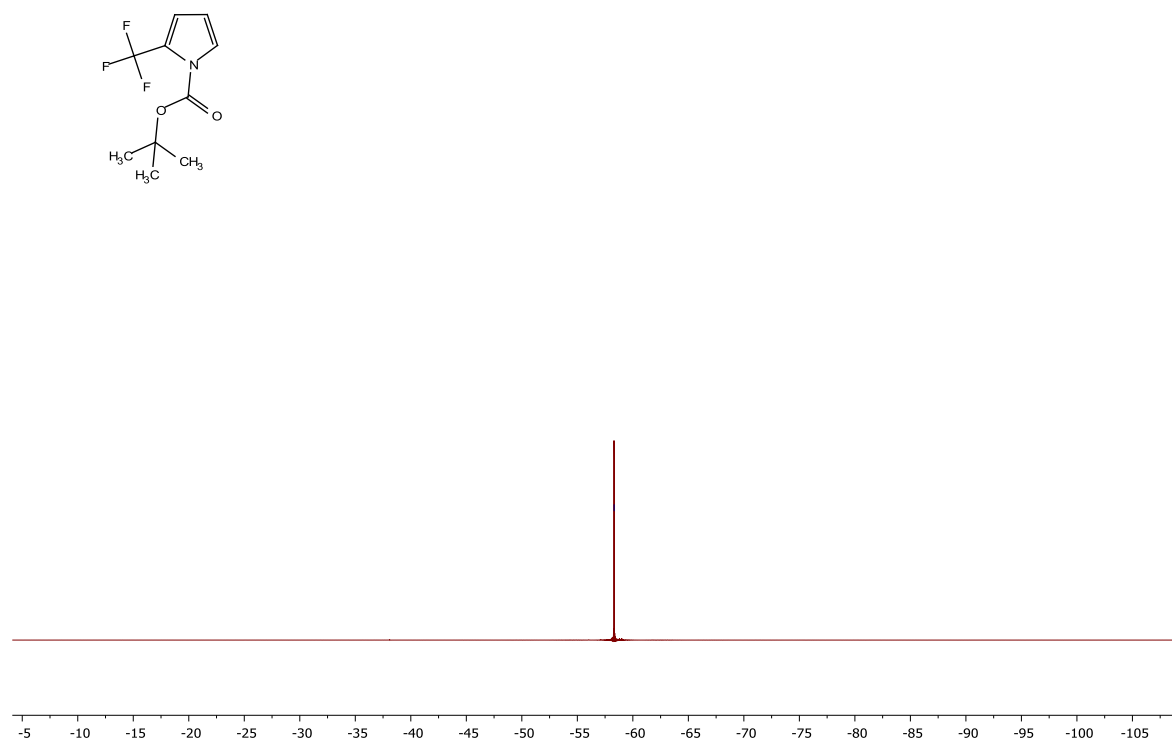

# 1-Phenyl-2-(trifluoromethyl)-1H-pyrrole (5)

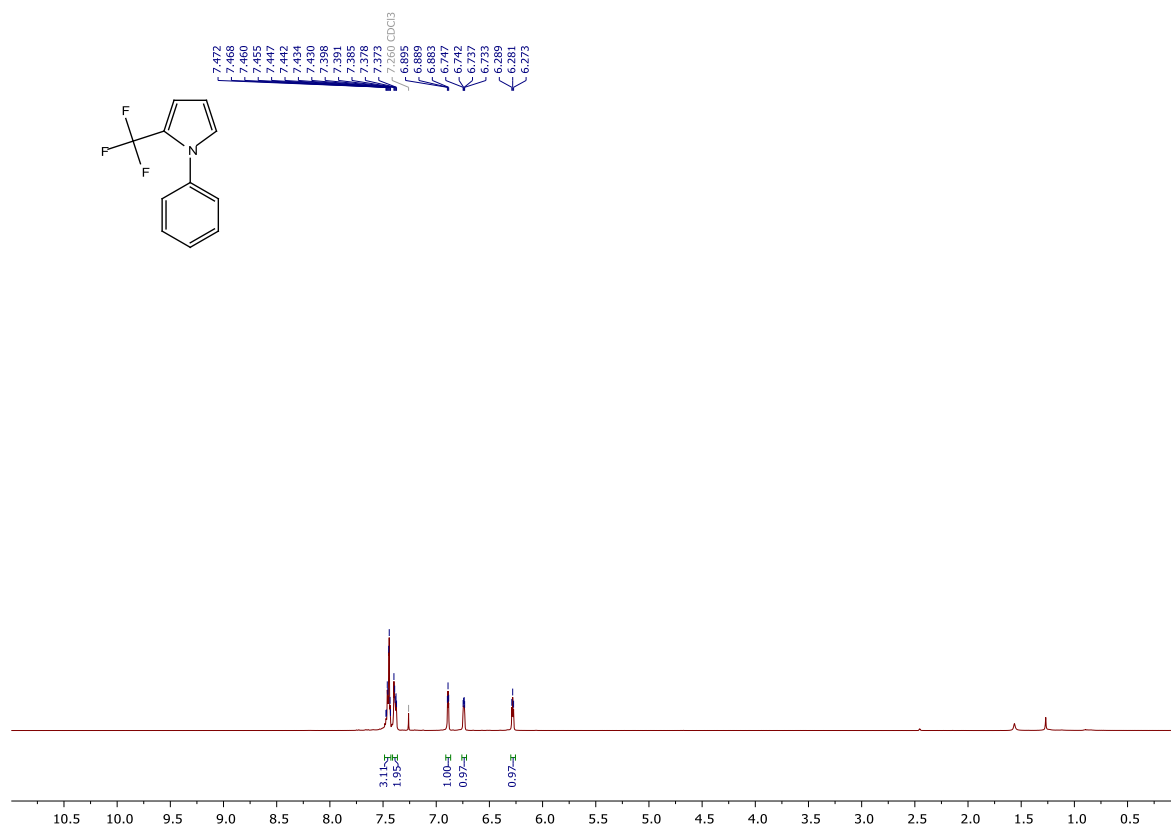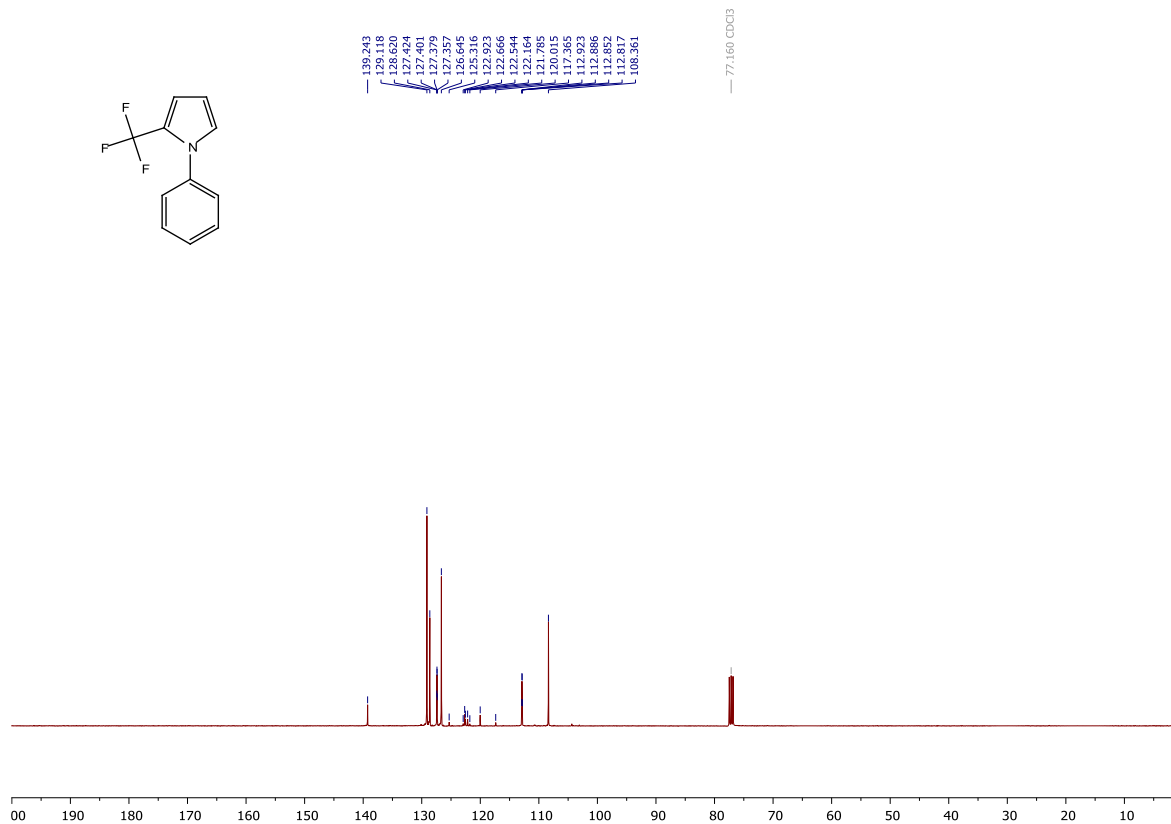

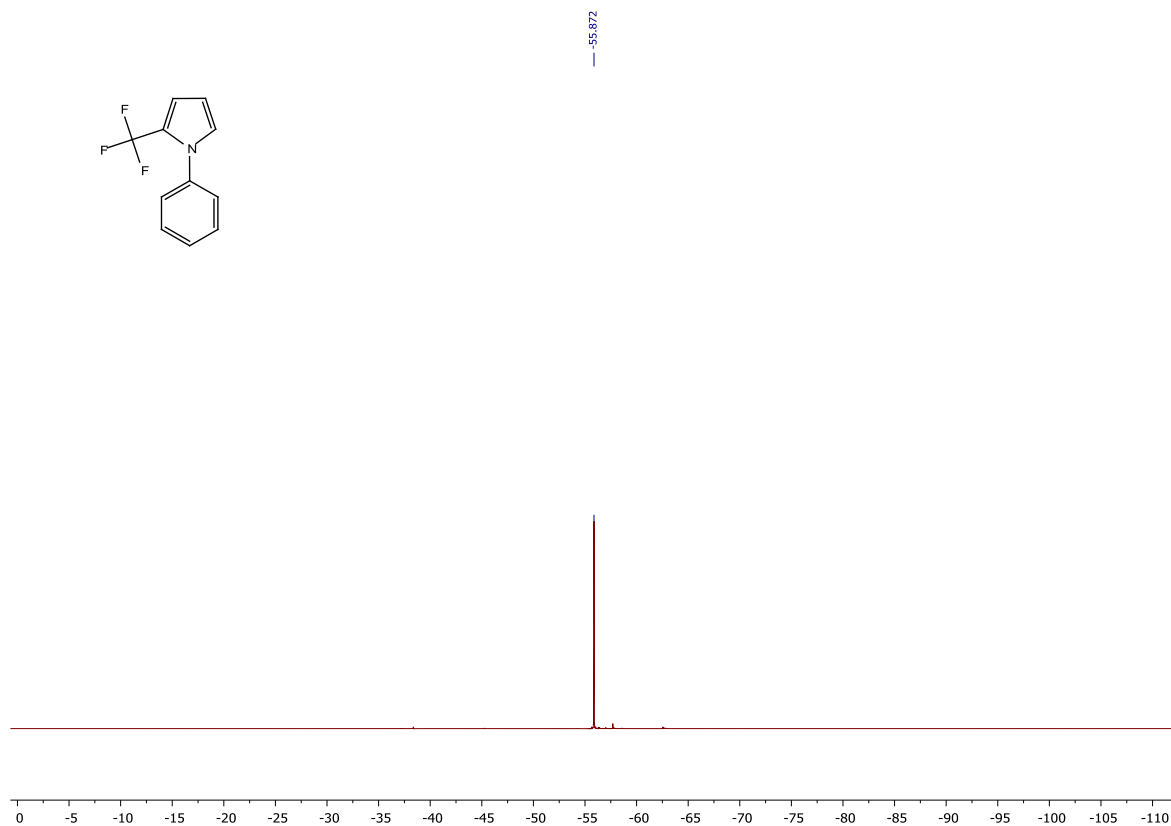

**1-Benzyl-2-(trifluoromethyl)-1H-pyrrole (6)**

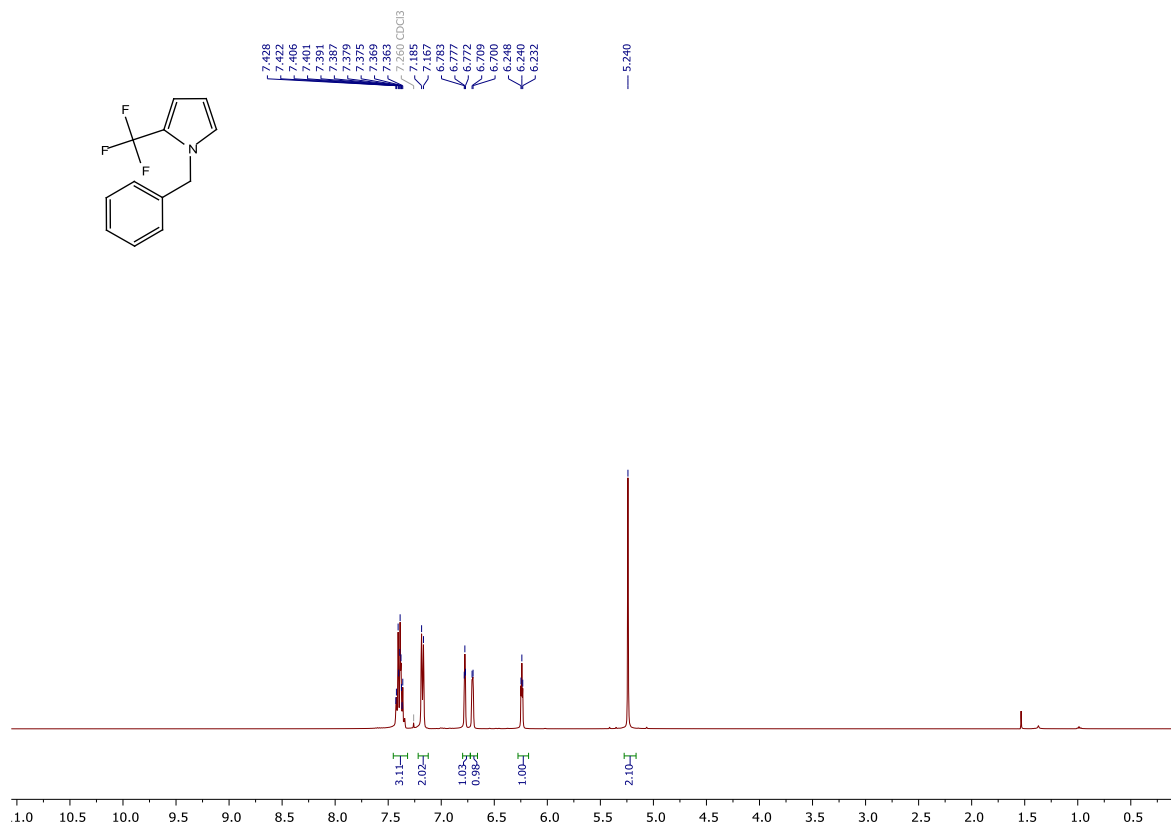

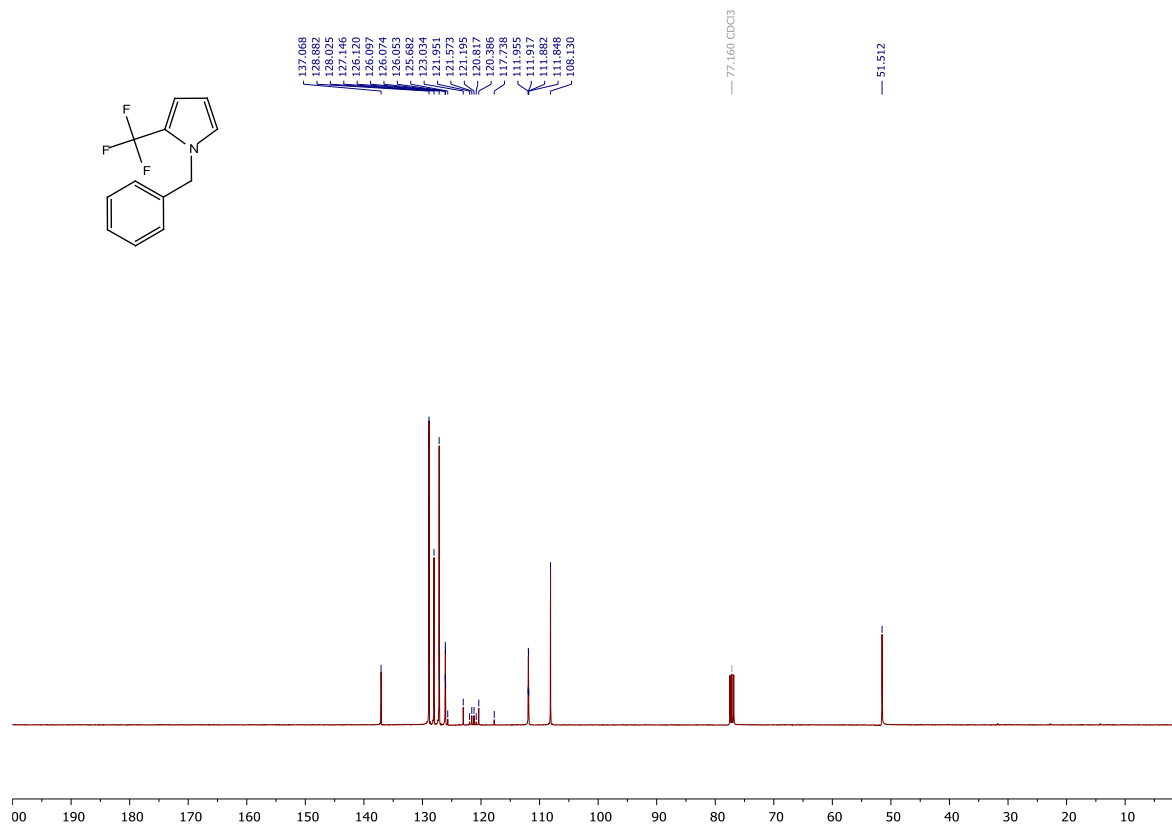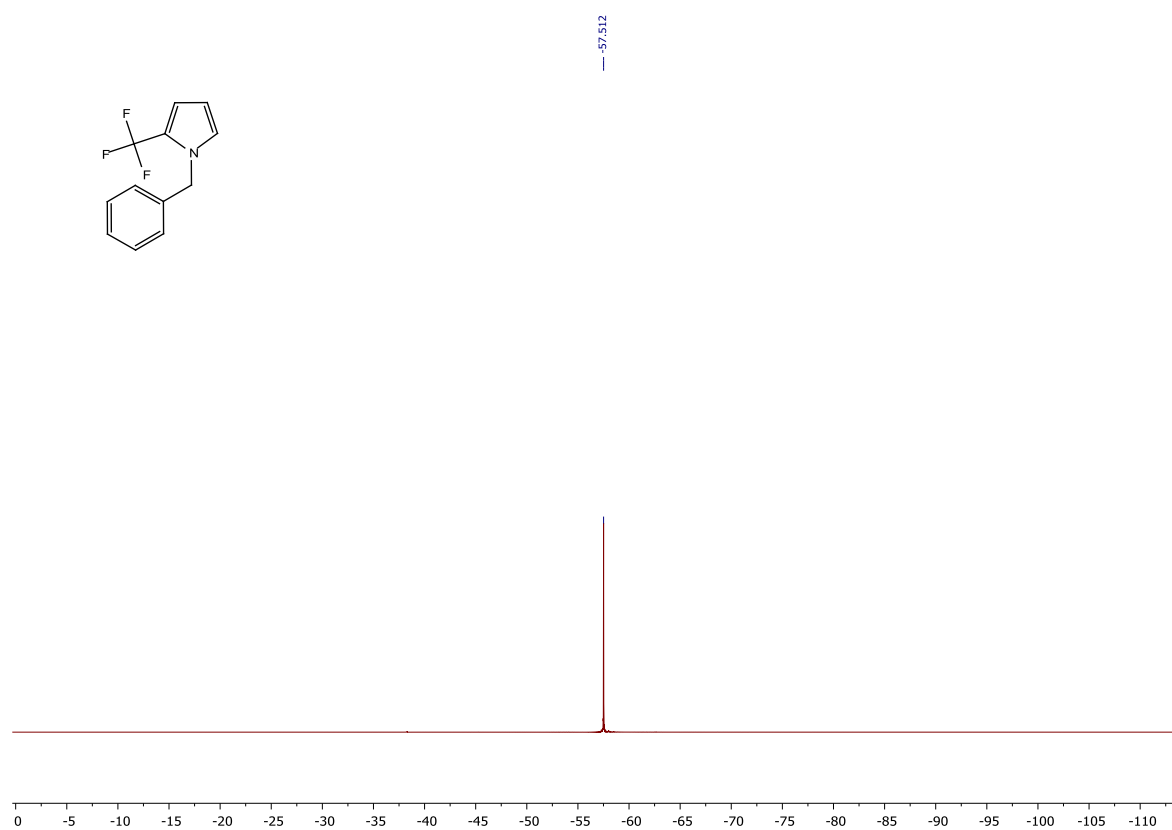

### 3-Methyl-2-(trifluoromethyl)-1H-indole (8)

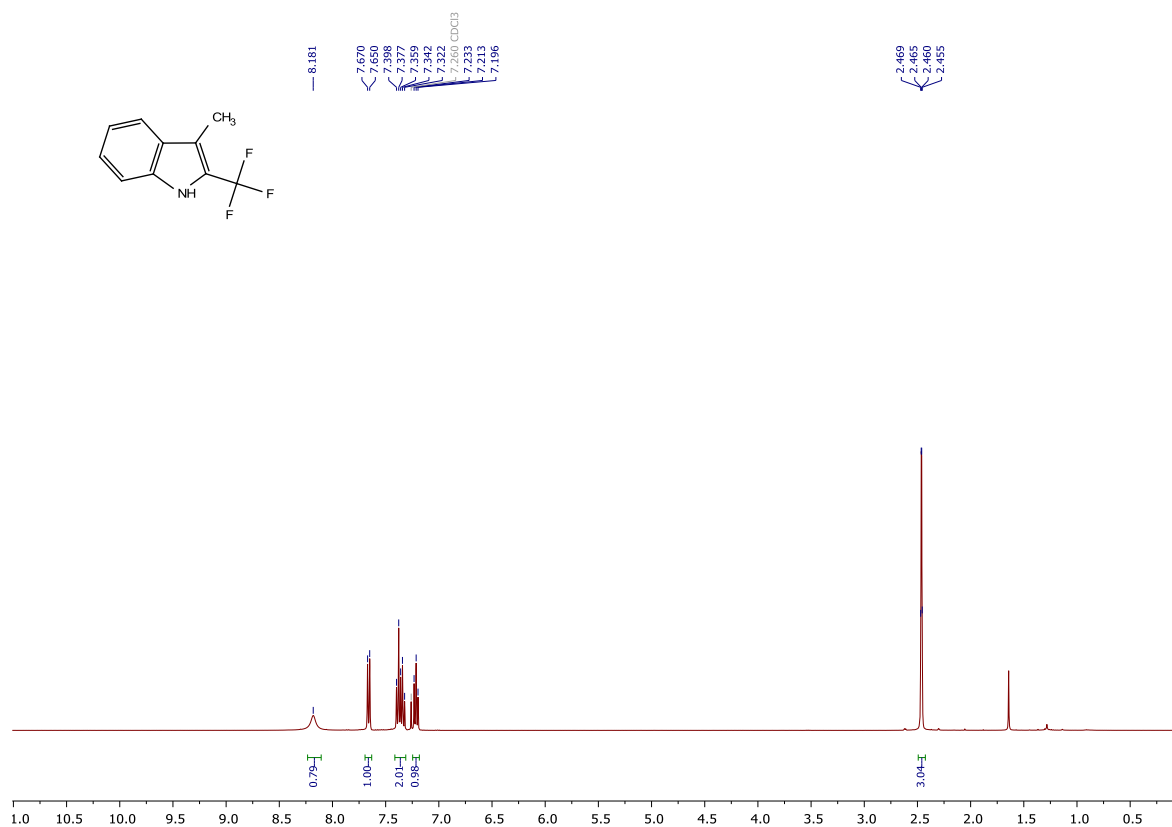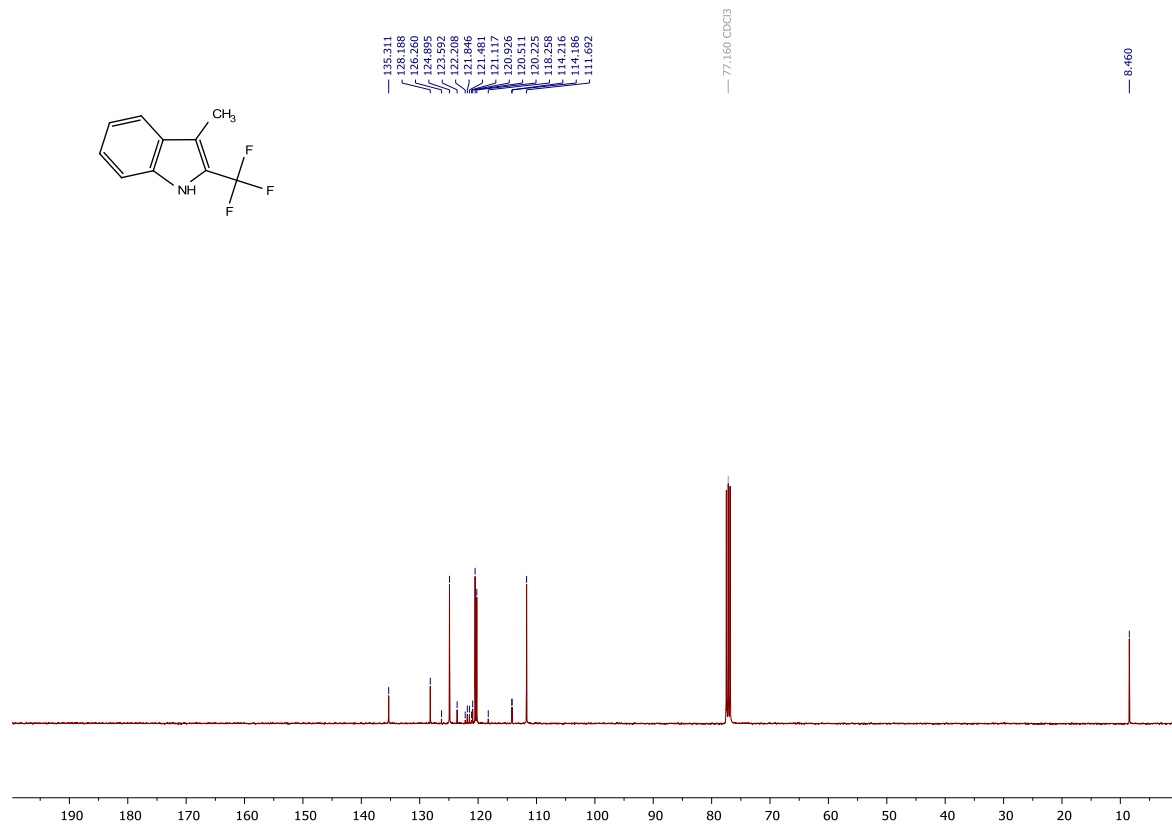

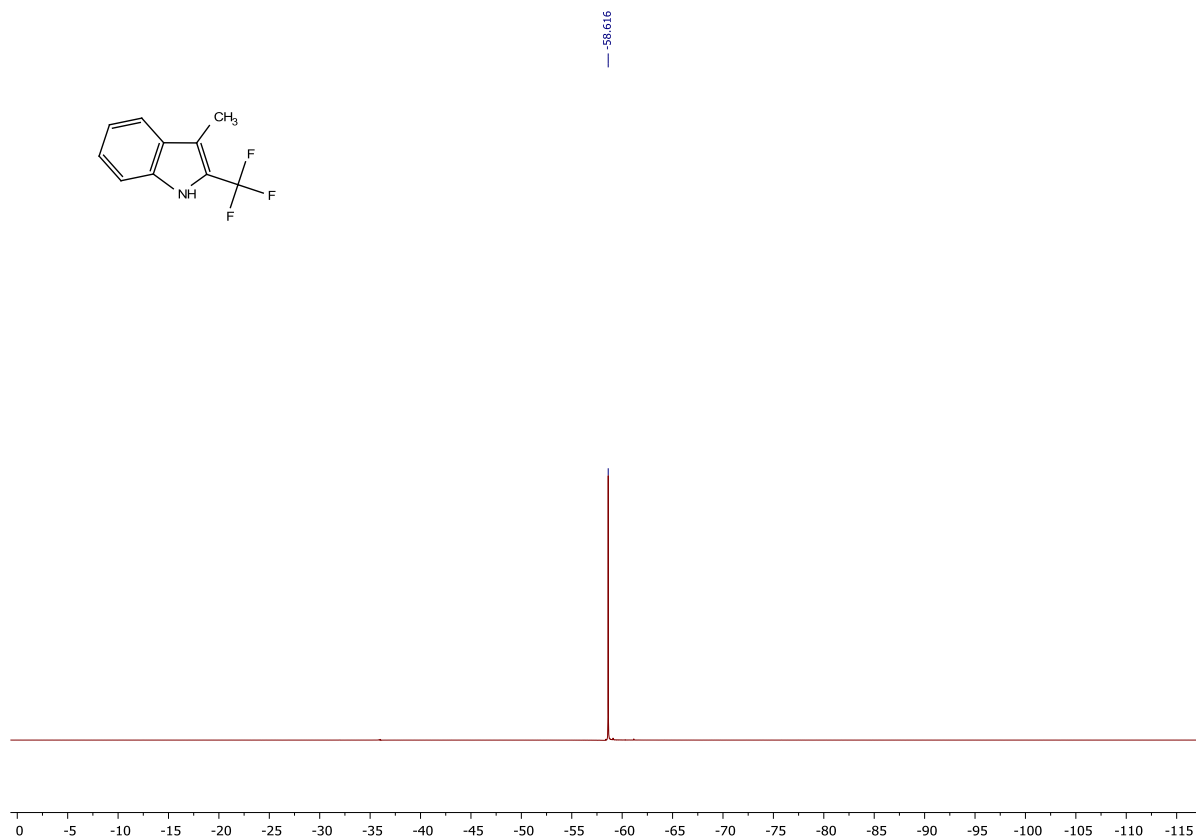

## 2-(Trifluoromethyl)-1H-indole-3-carbaldehyde (9)

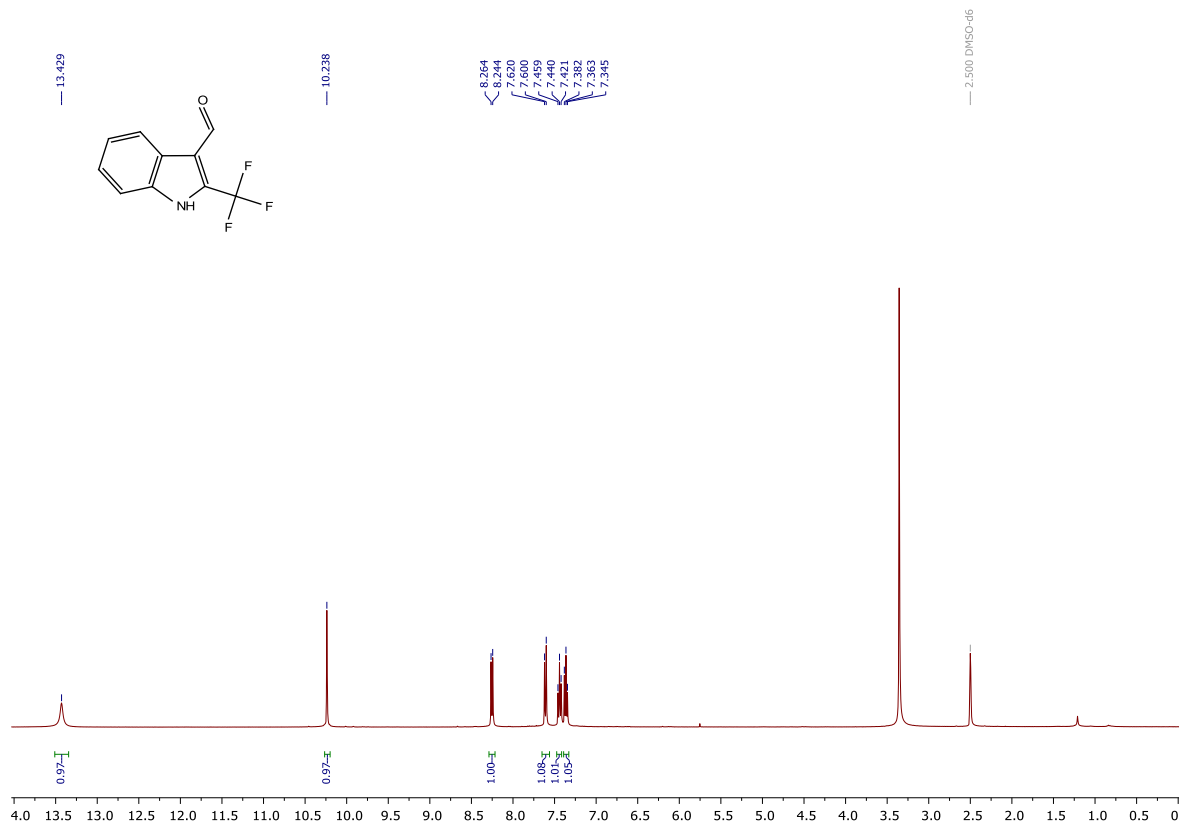

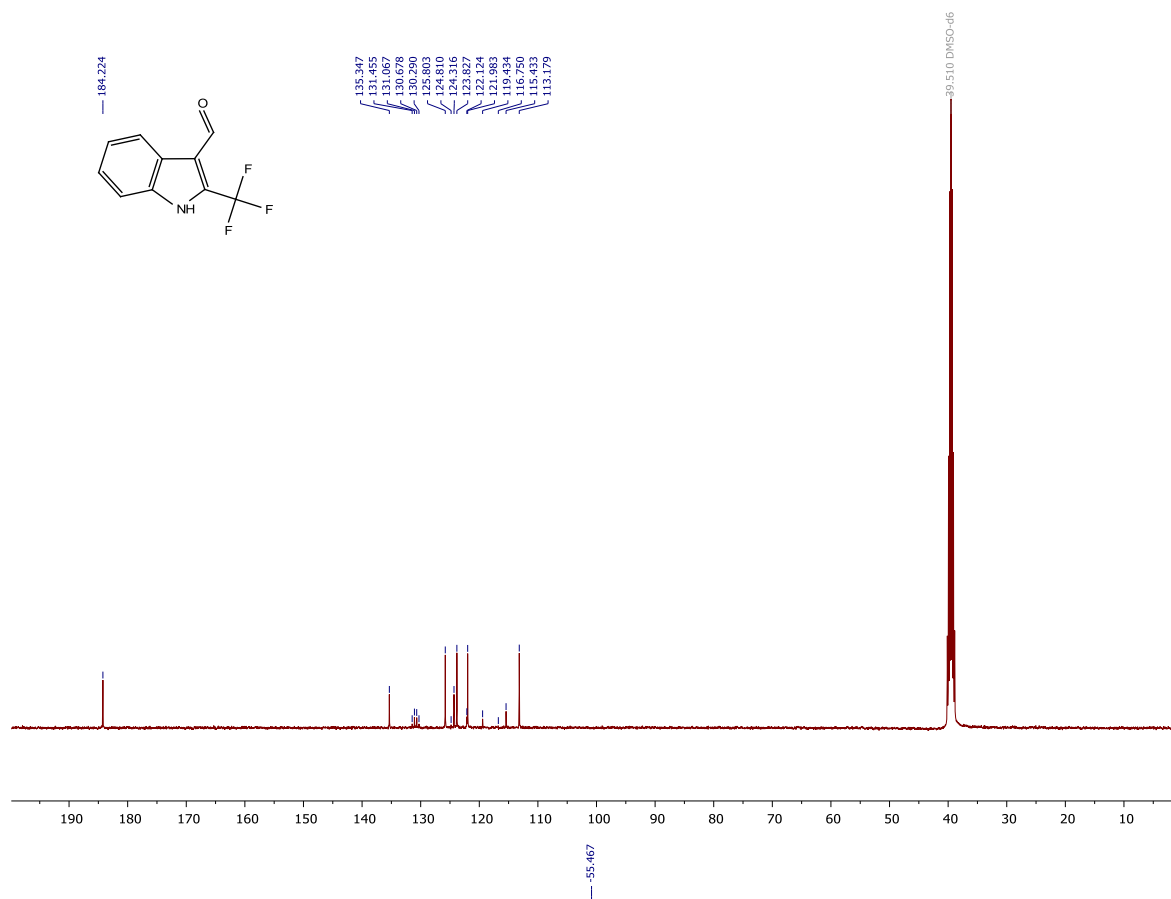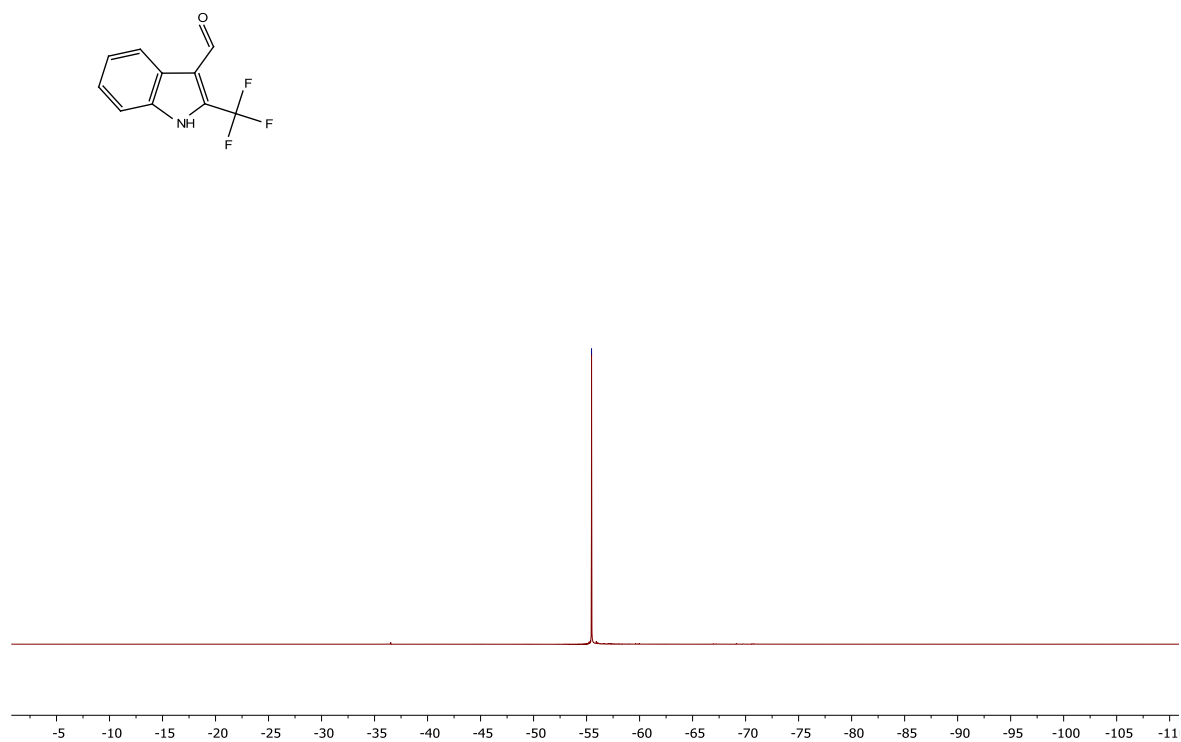

# 1-(2-(Trifluoromethyl)-1H-indol-3-yl)ethan-1-one (10)

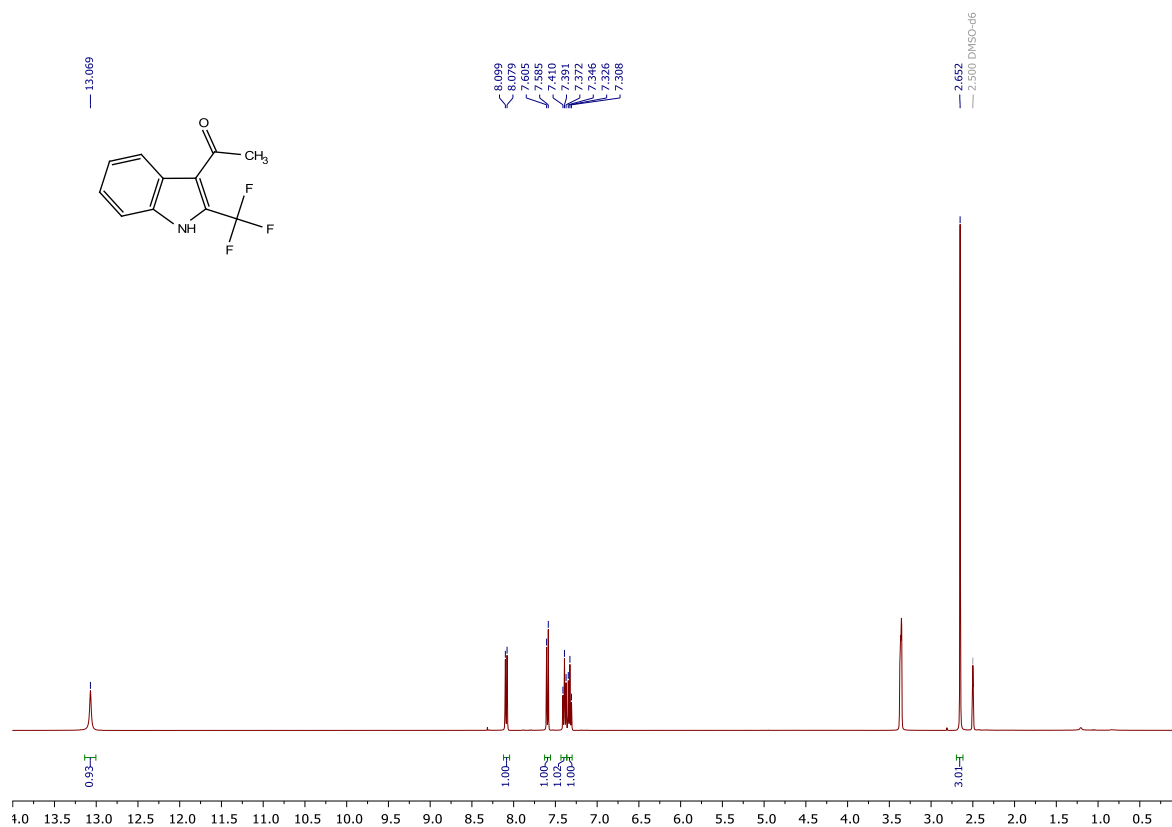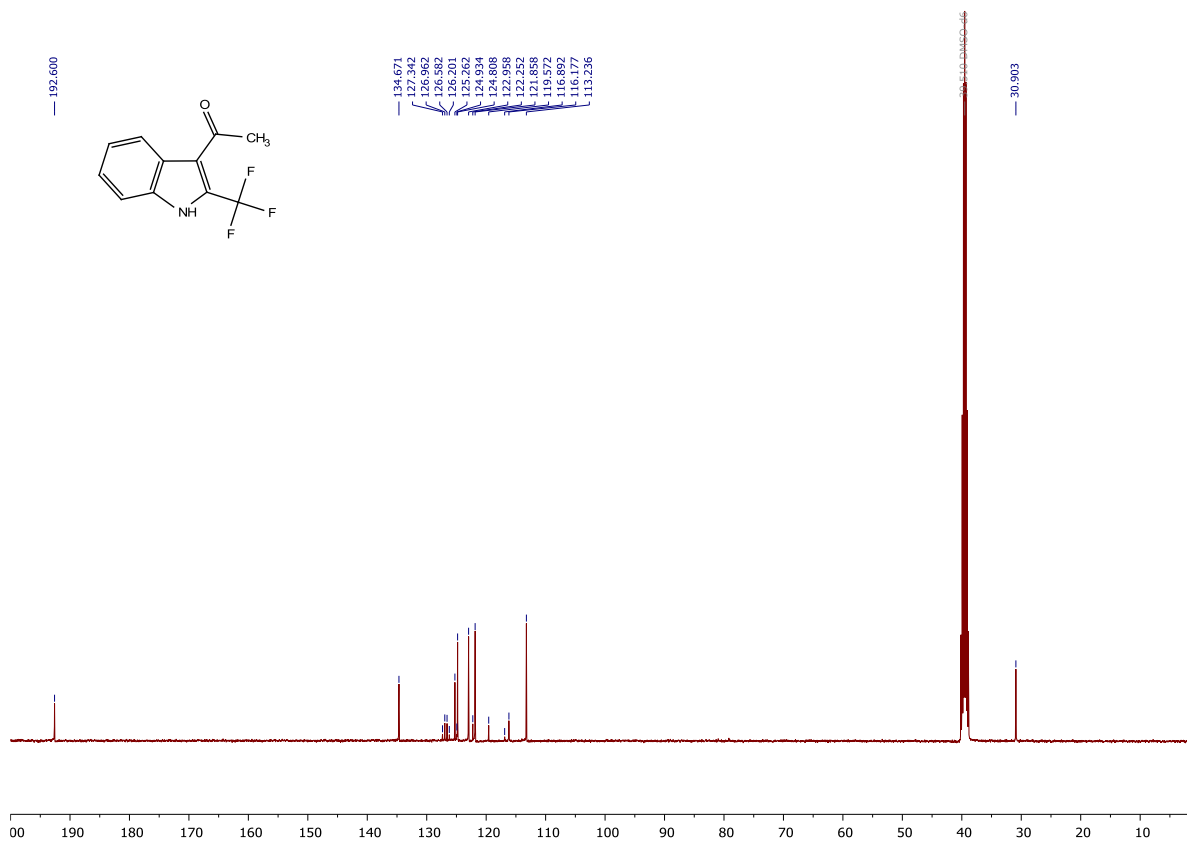



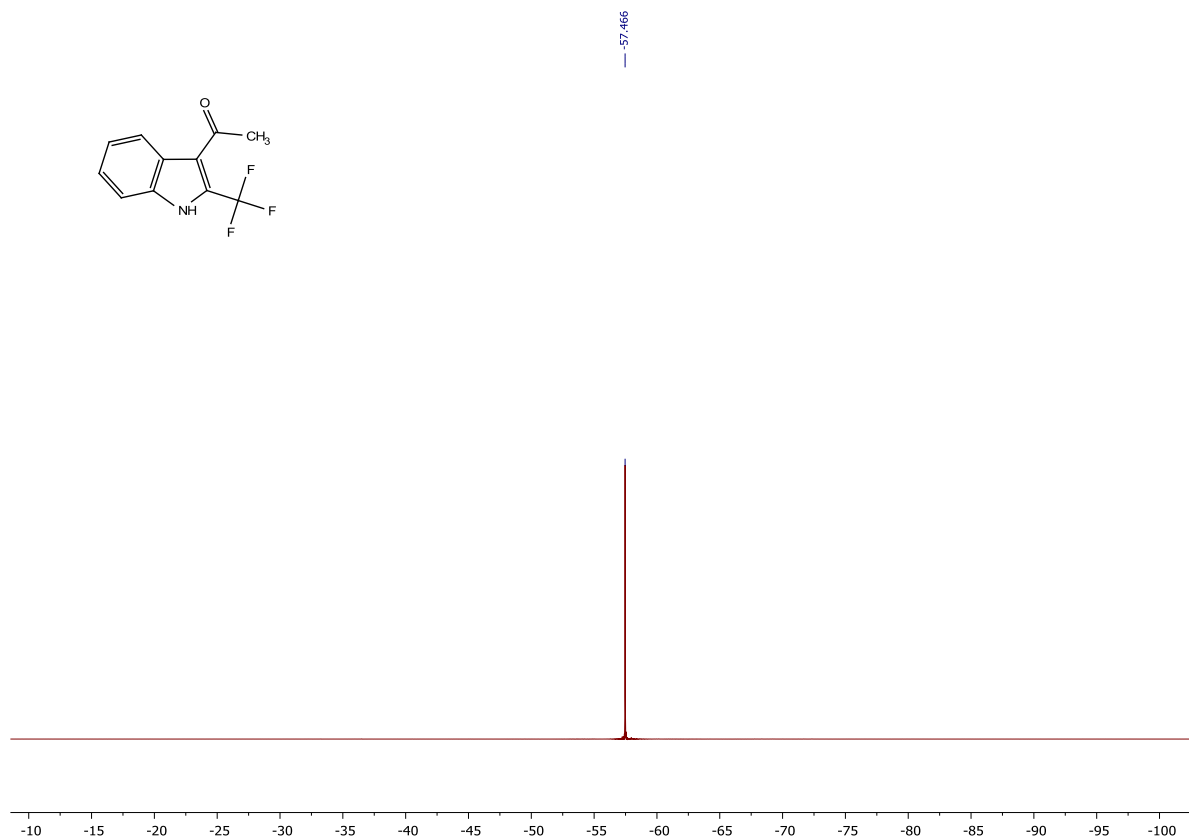

### Methyl 2-(trifluoromethyl)-1*H*-indole-3-carboxylate (11)

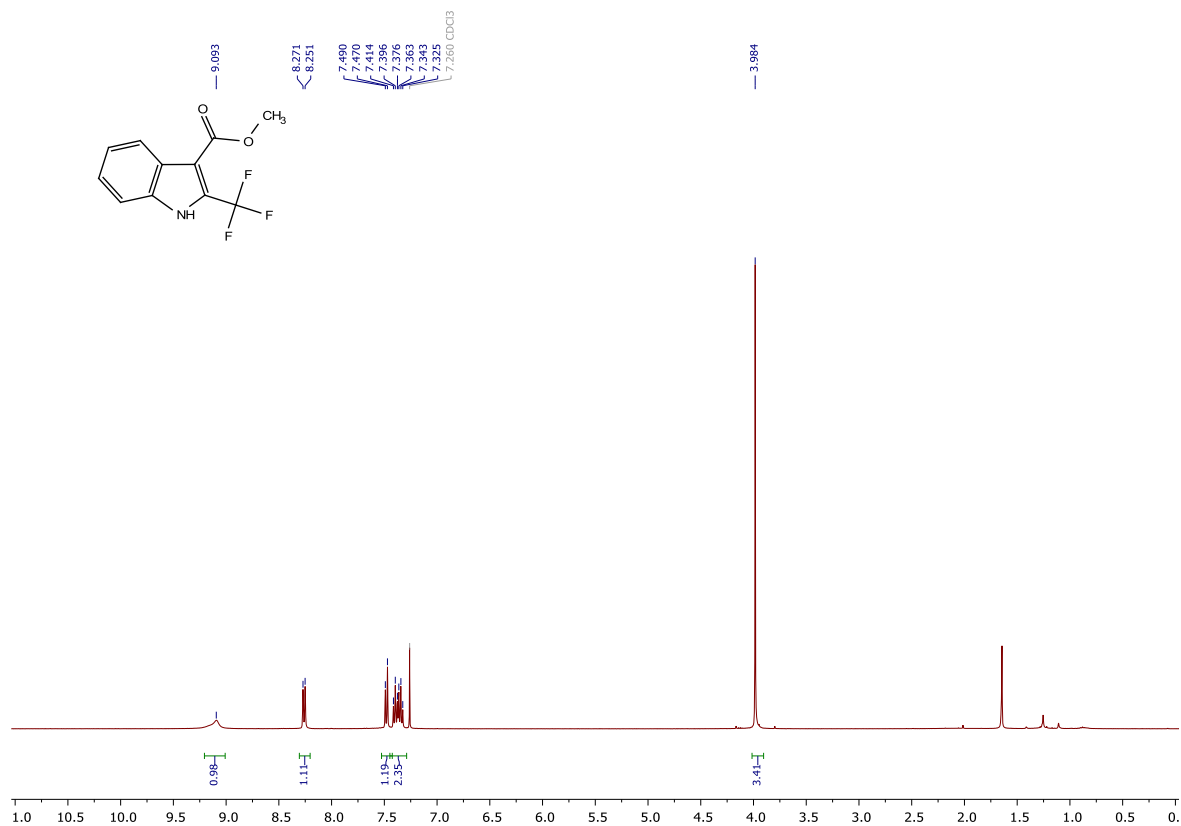

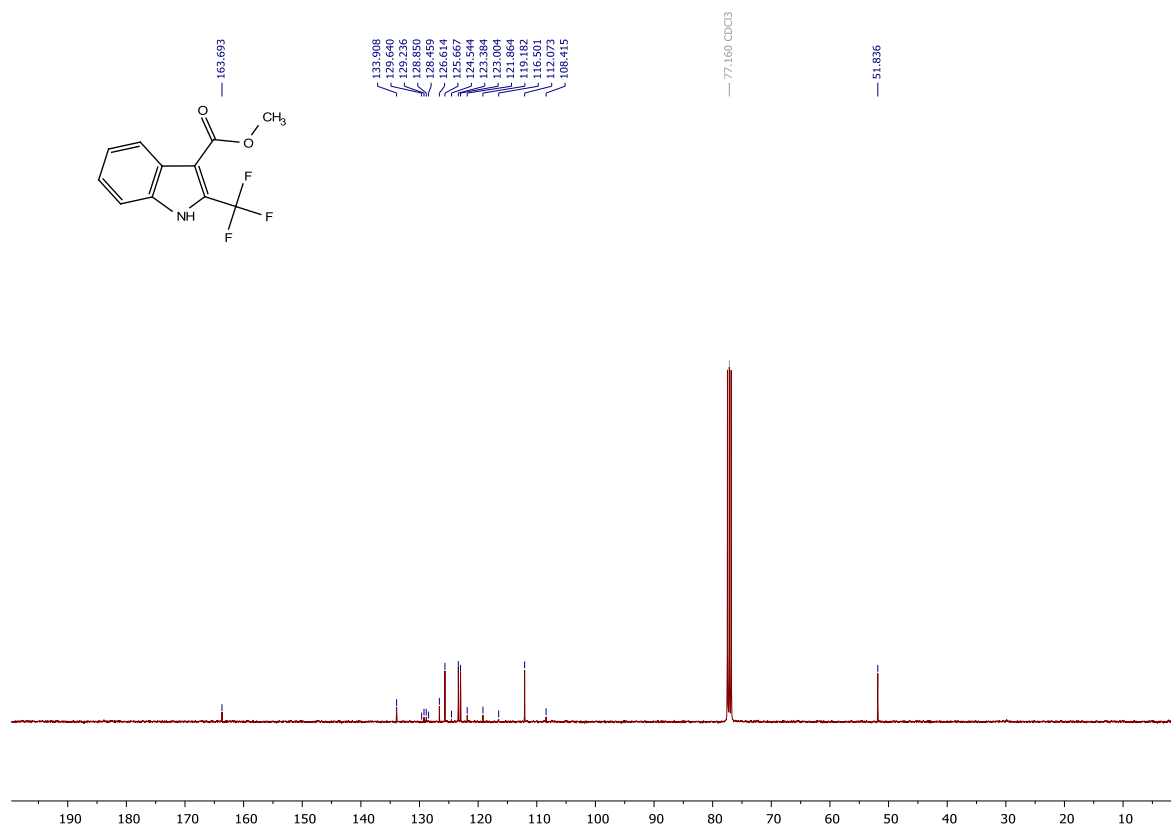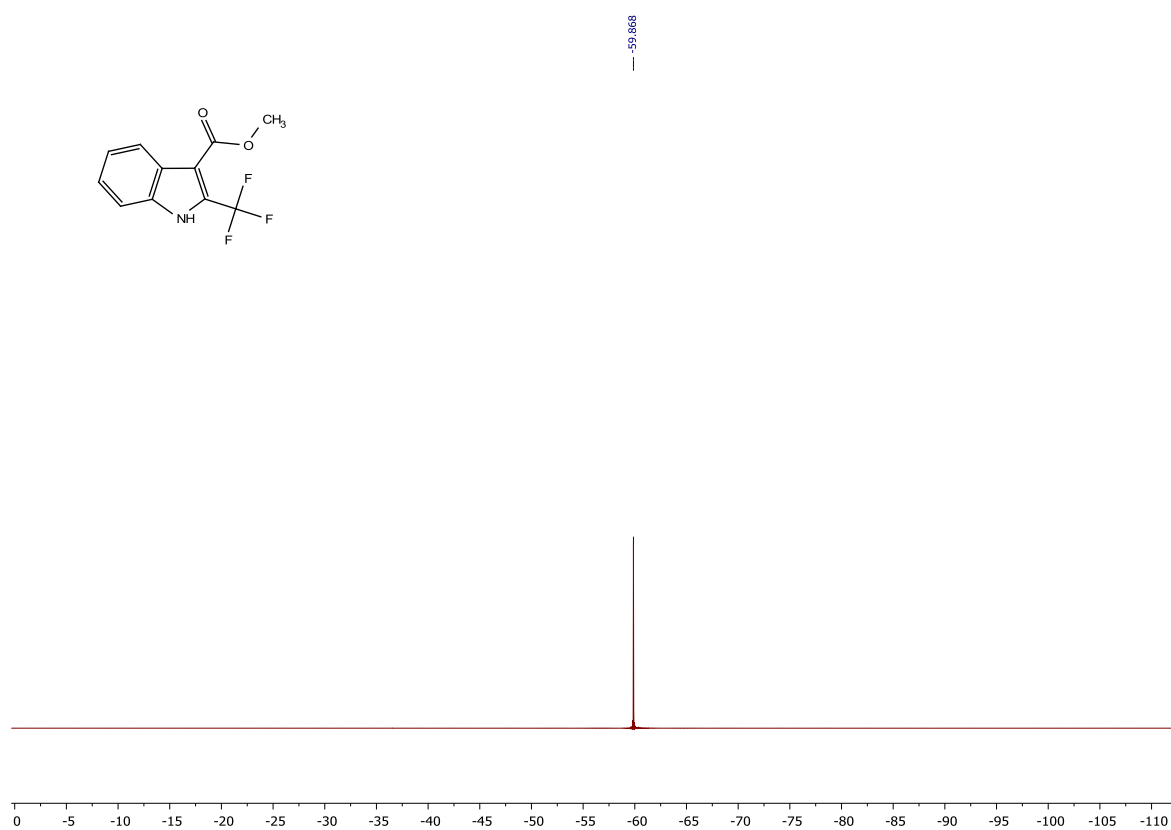

### 3-(2-Bromoethyl)-2-(trifluoromethyl)-1H-indole (12)

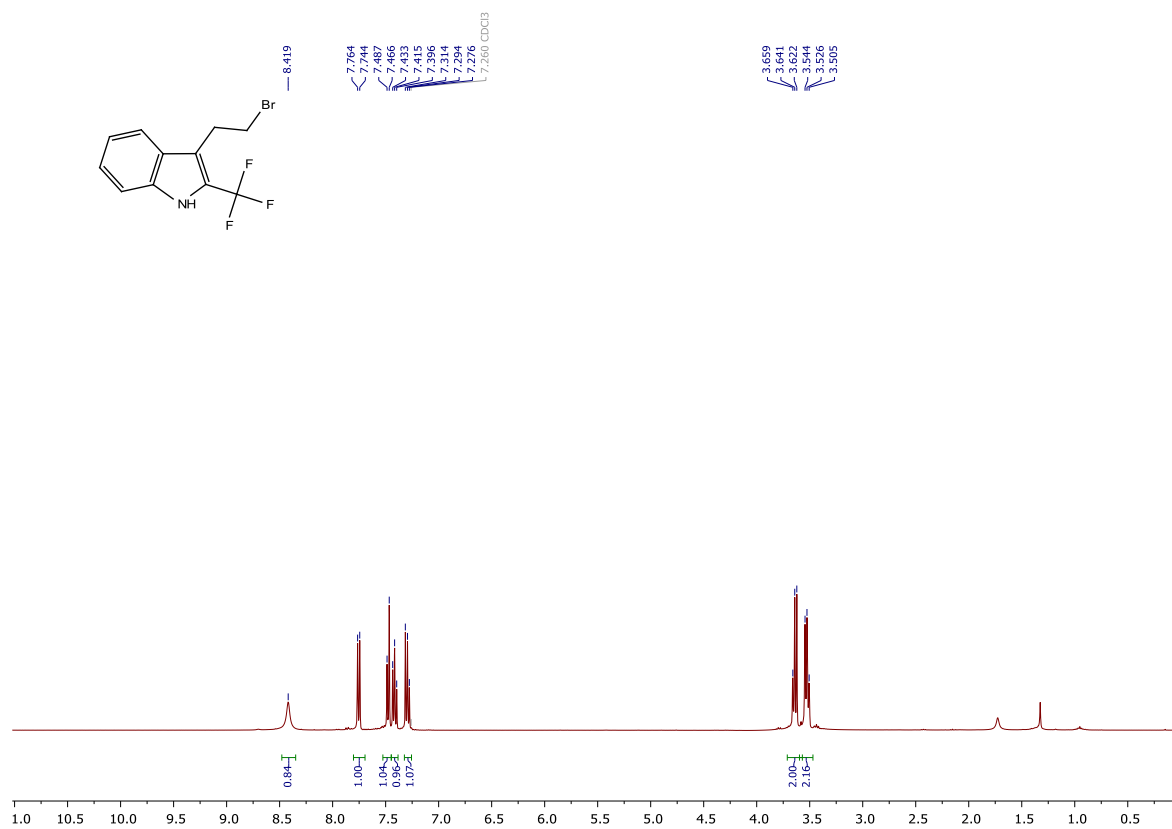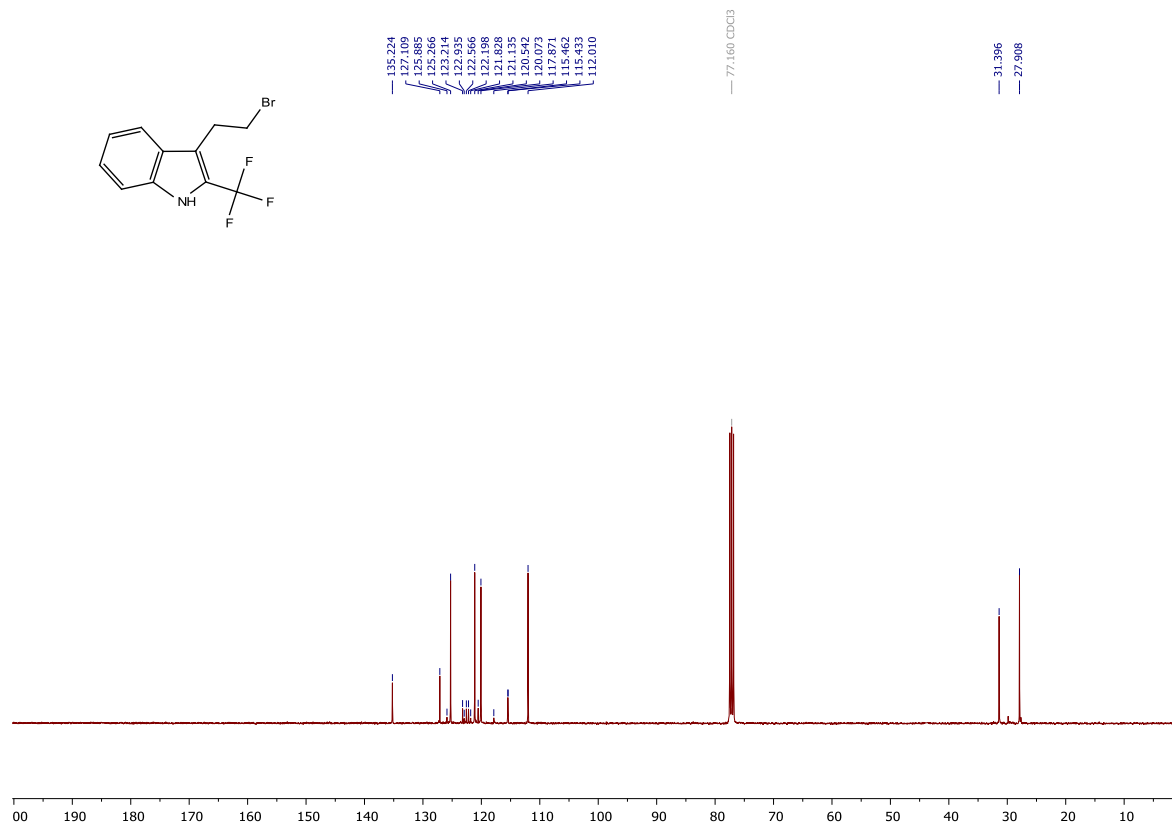

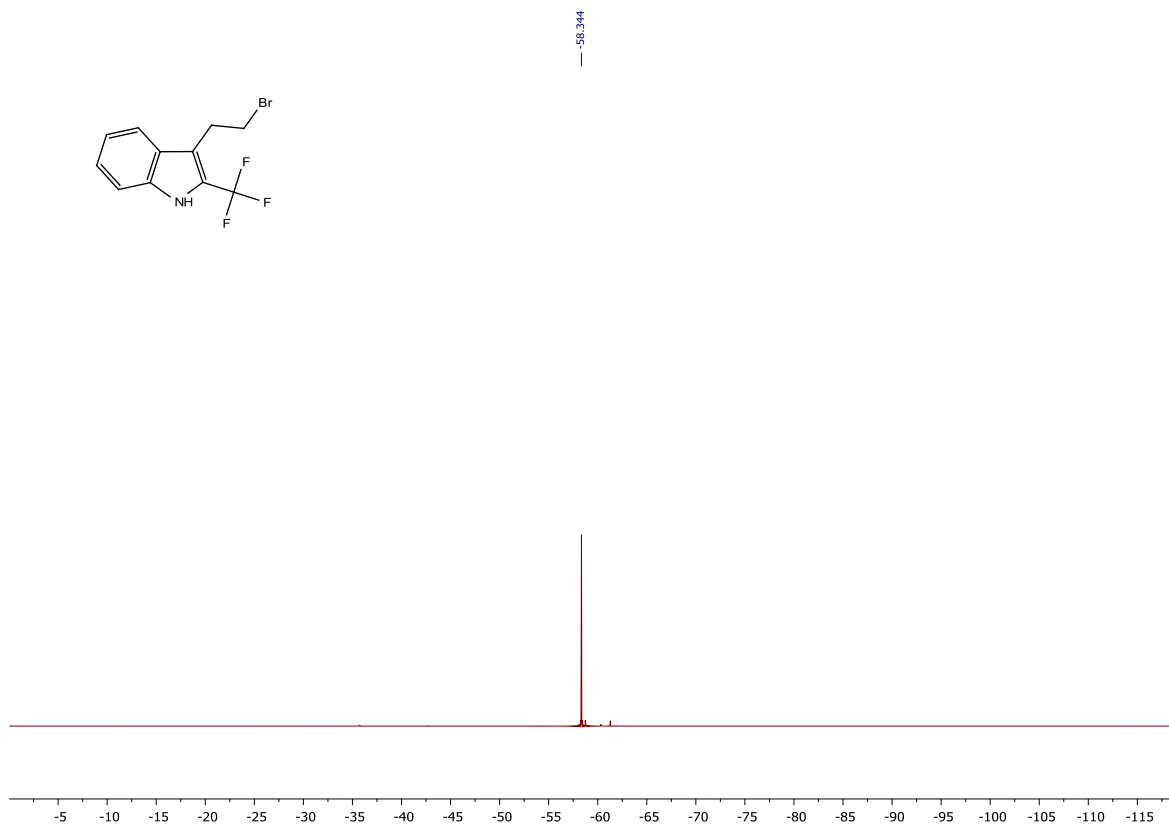

**1-(1-Methyl-2-(trifluoromethyl)-1H-indol-3-yl)ethan-1-one (13)**

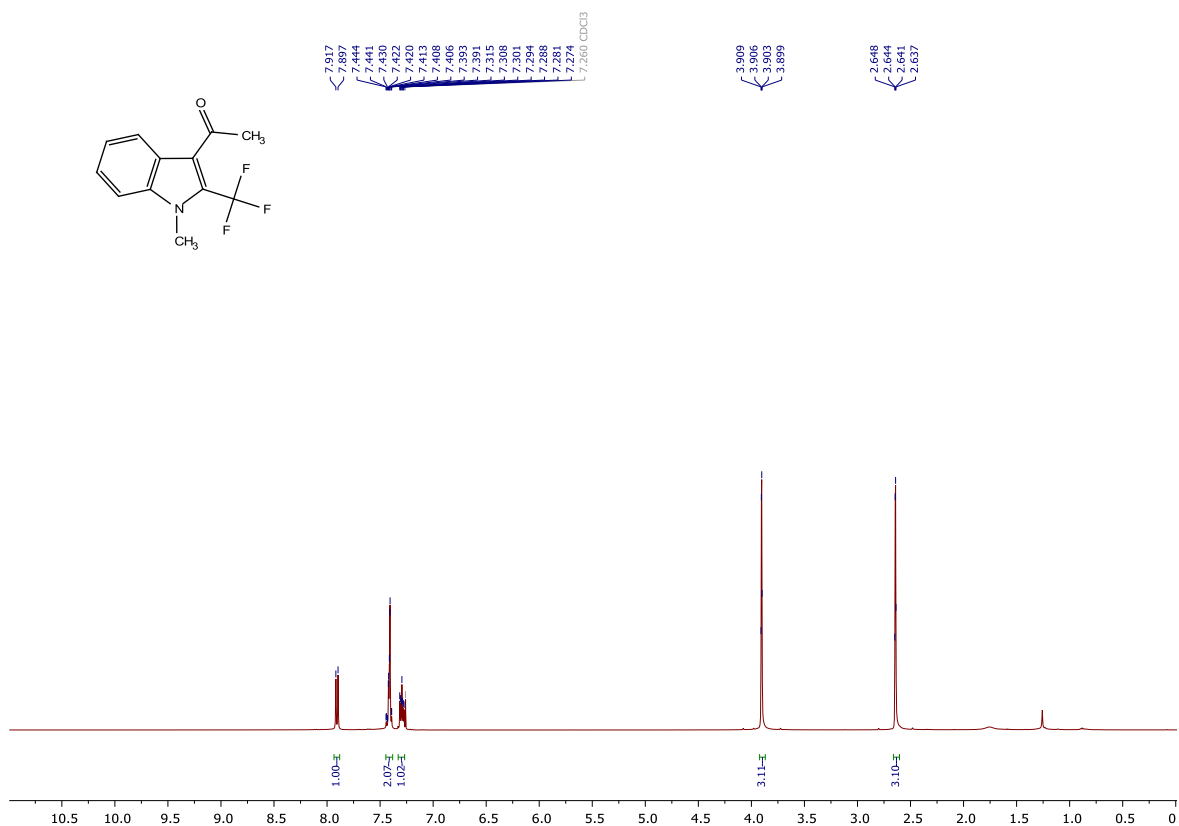

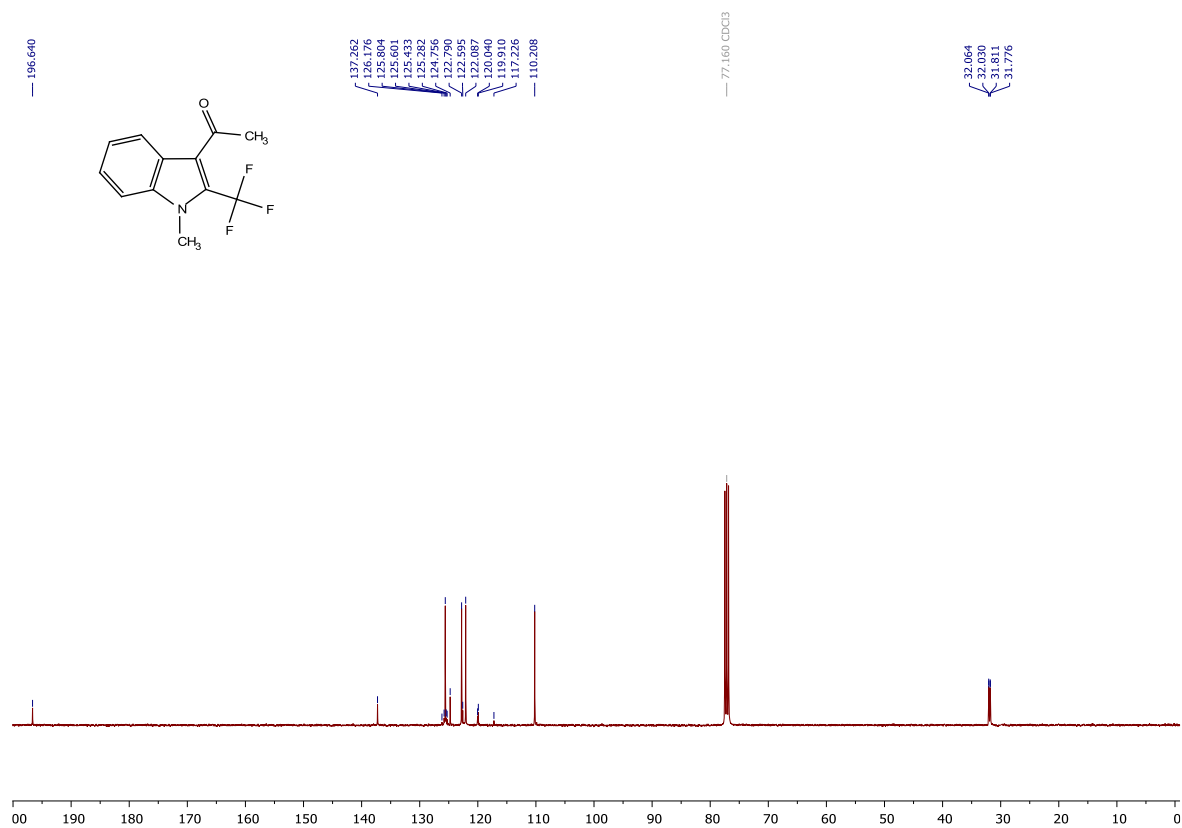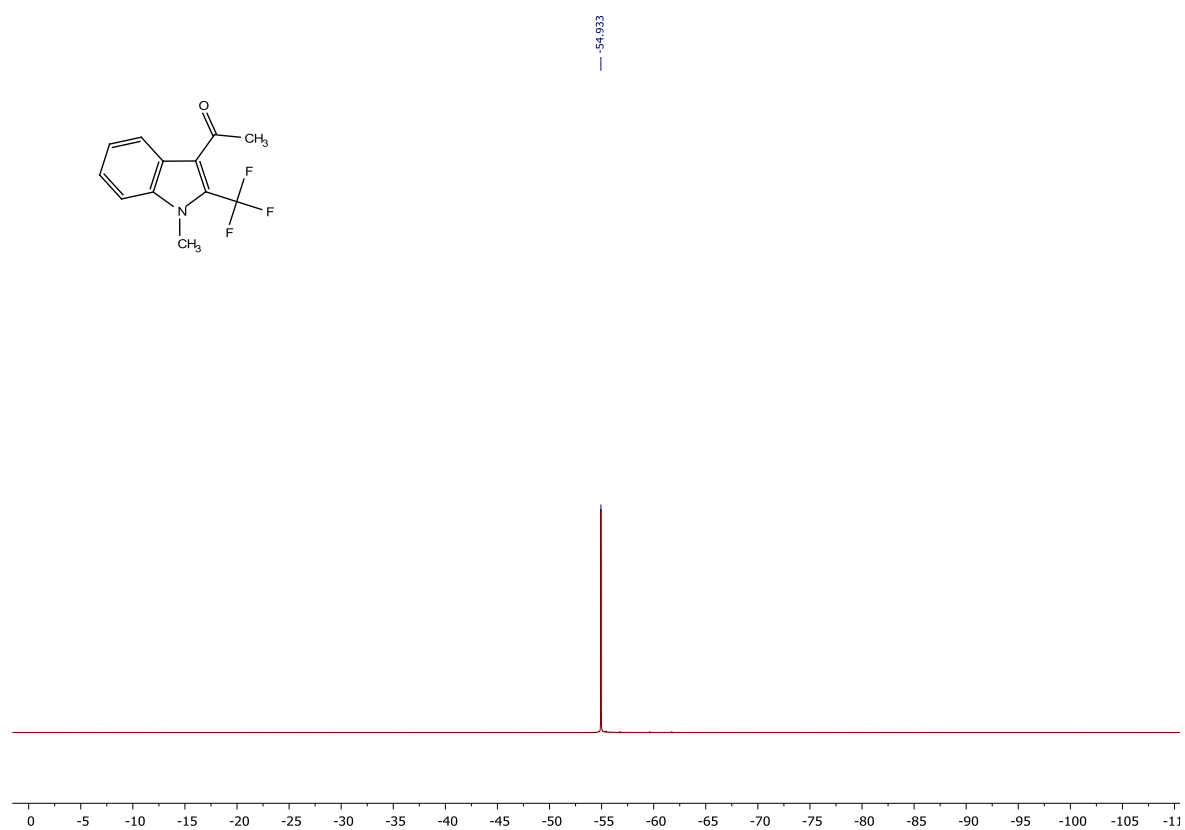

## 2,3,5-Trimethyl-6-(trifluoromethyl)pyrazine (16)

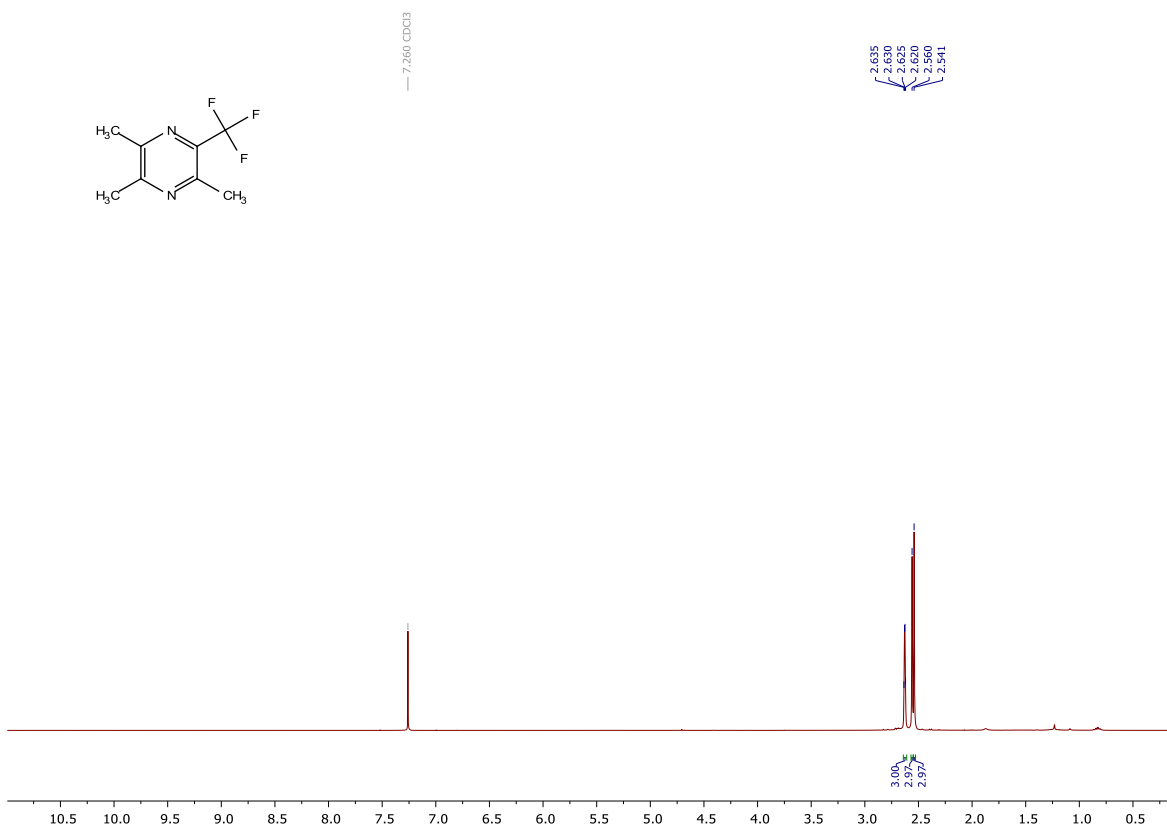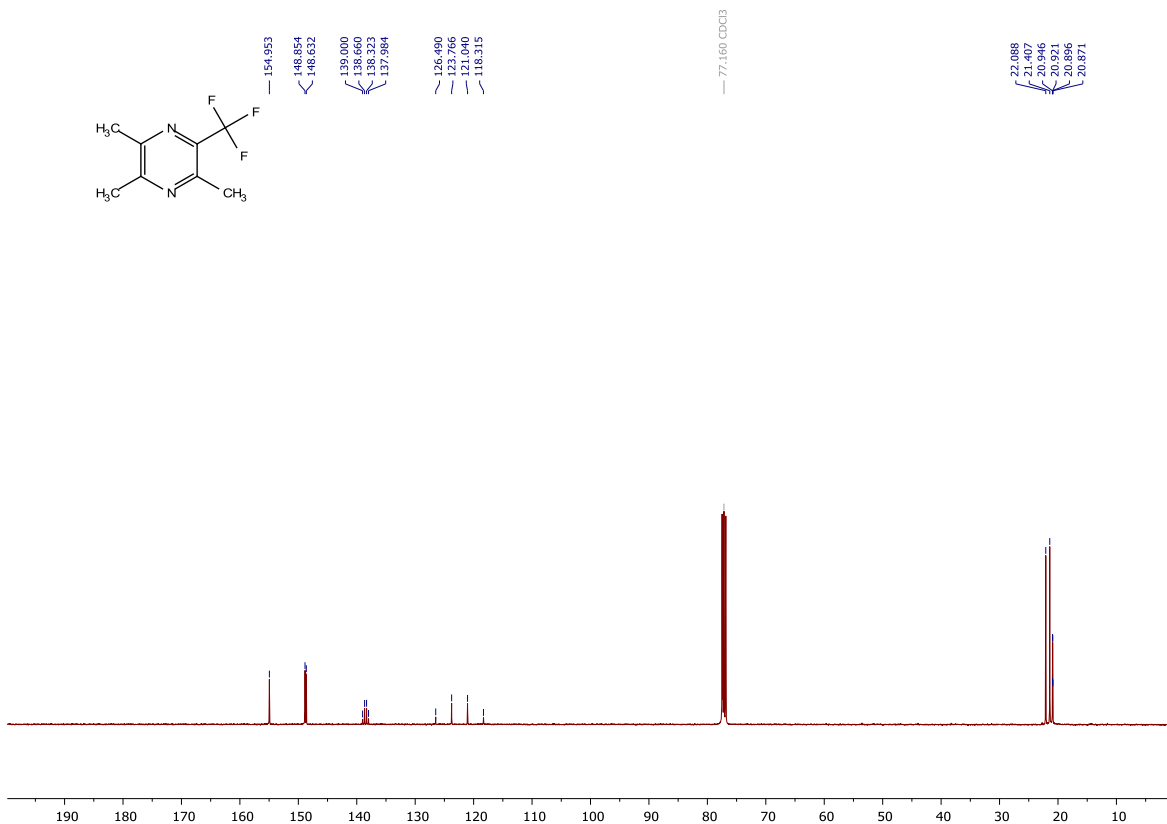

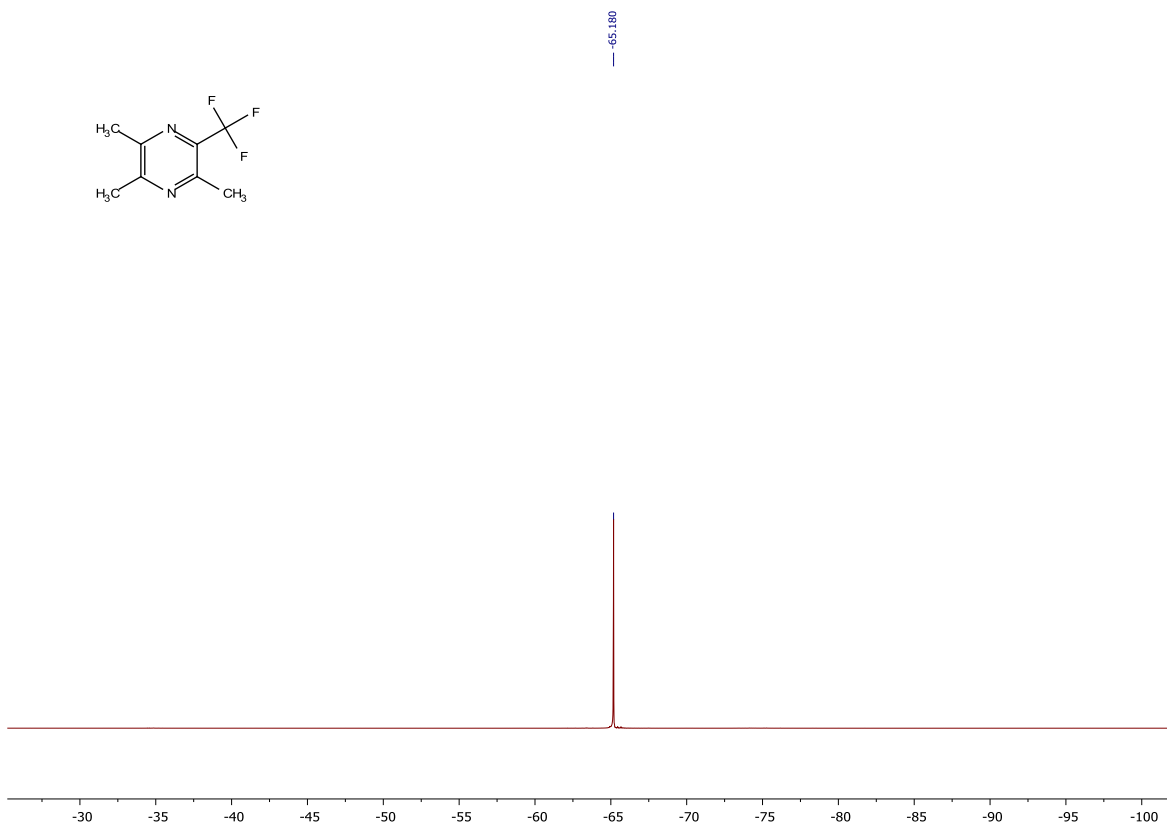

## 2,5-Dimethyl-3-(trifluoromethyl)pyrazine (17)

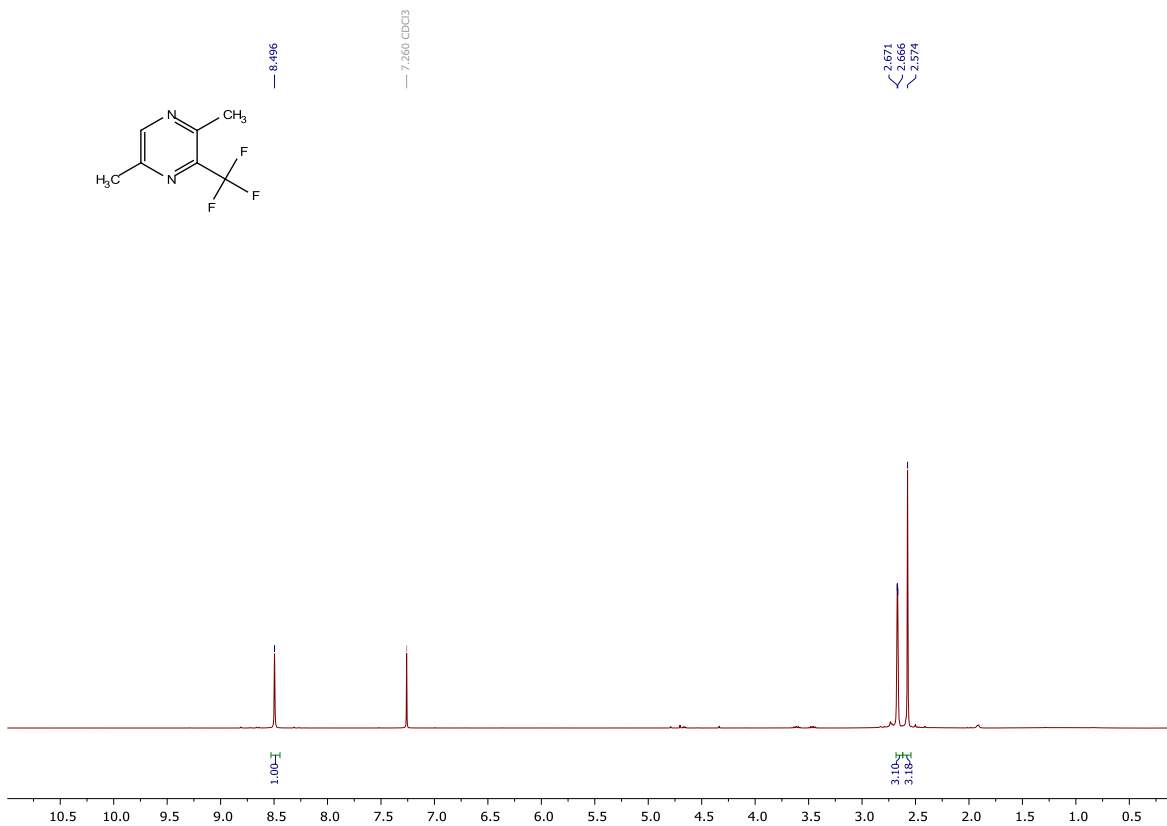

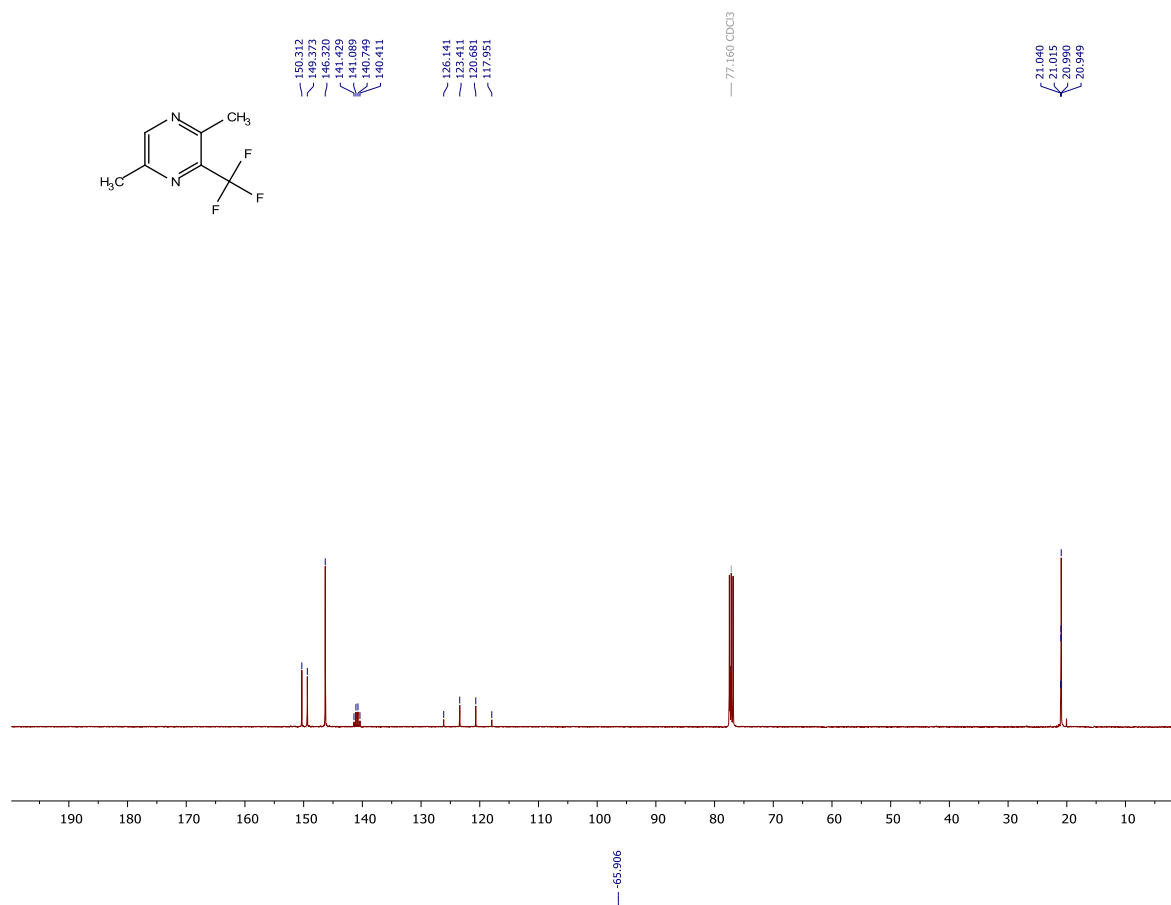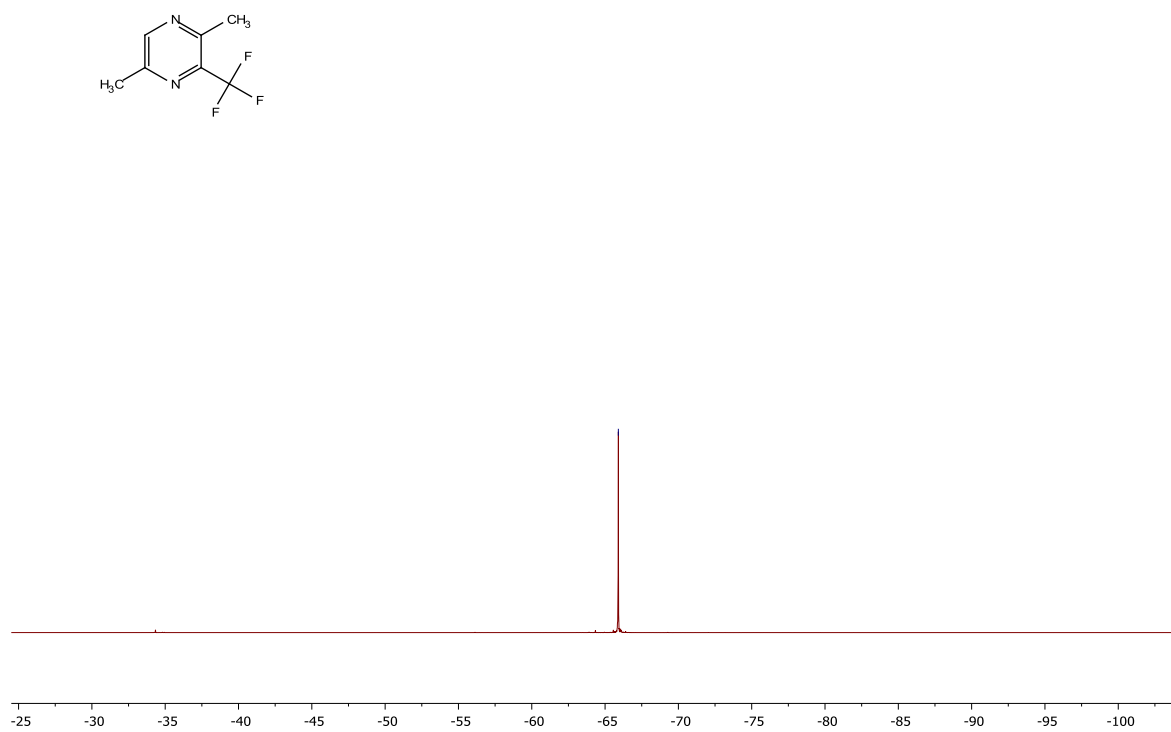



### 3,5-Dimethyl-2-(trifluoromethyl)pyrazine (18)

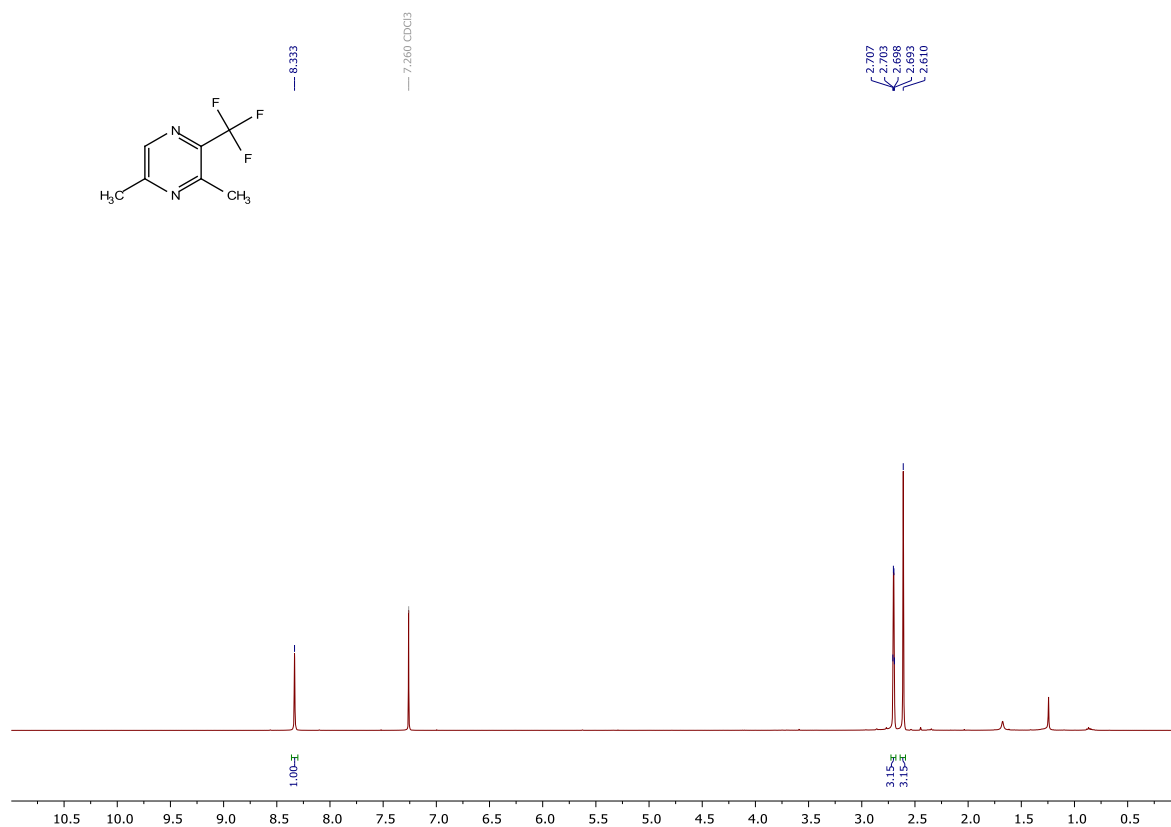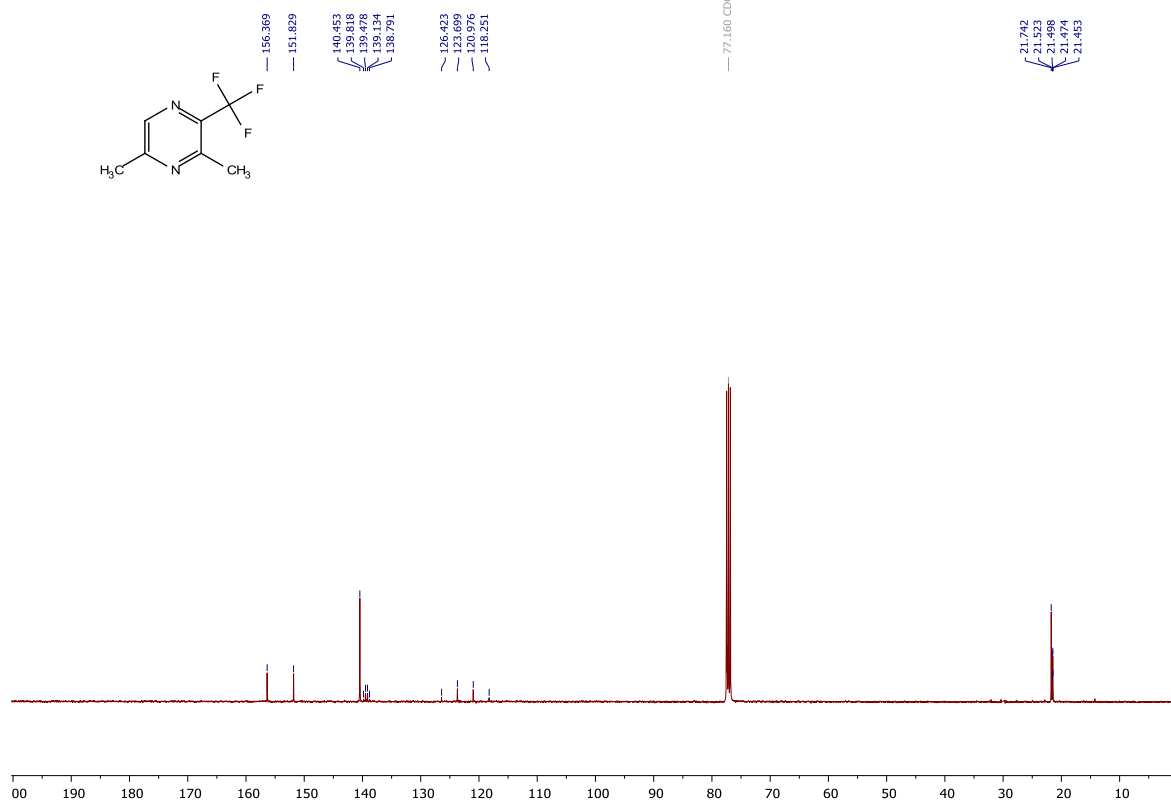

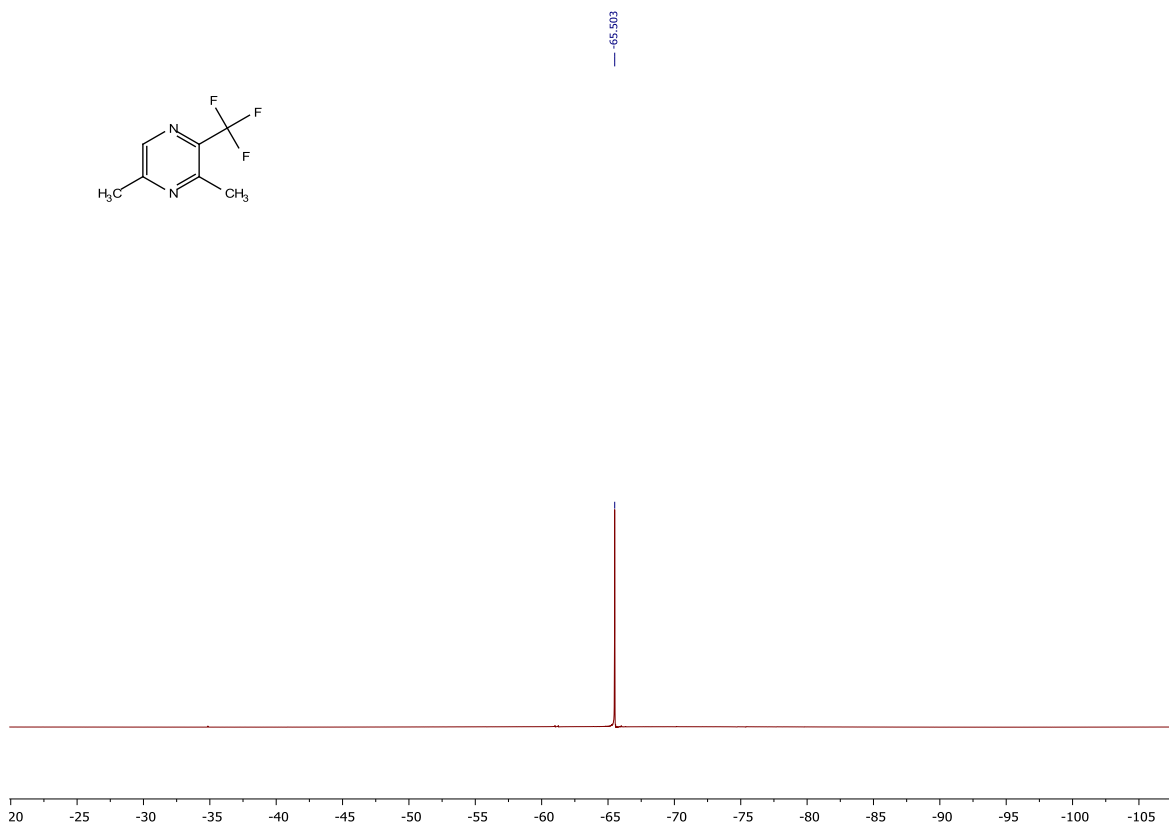

***S*-((5-(Trifluoromethyl)furan-2-yl)methyl)methanethioate (19)**

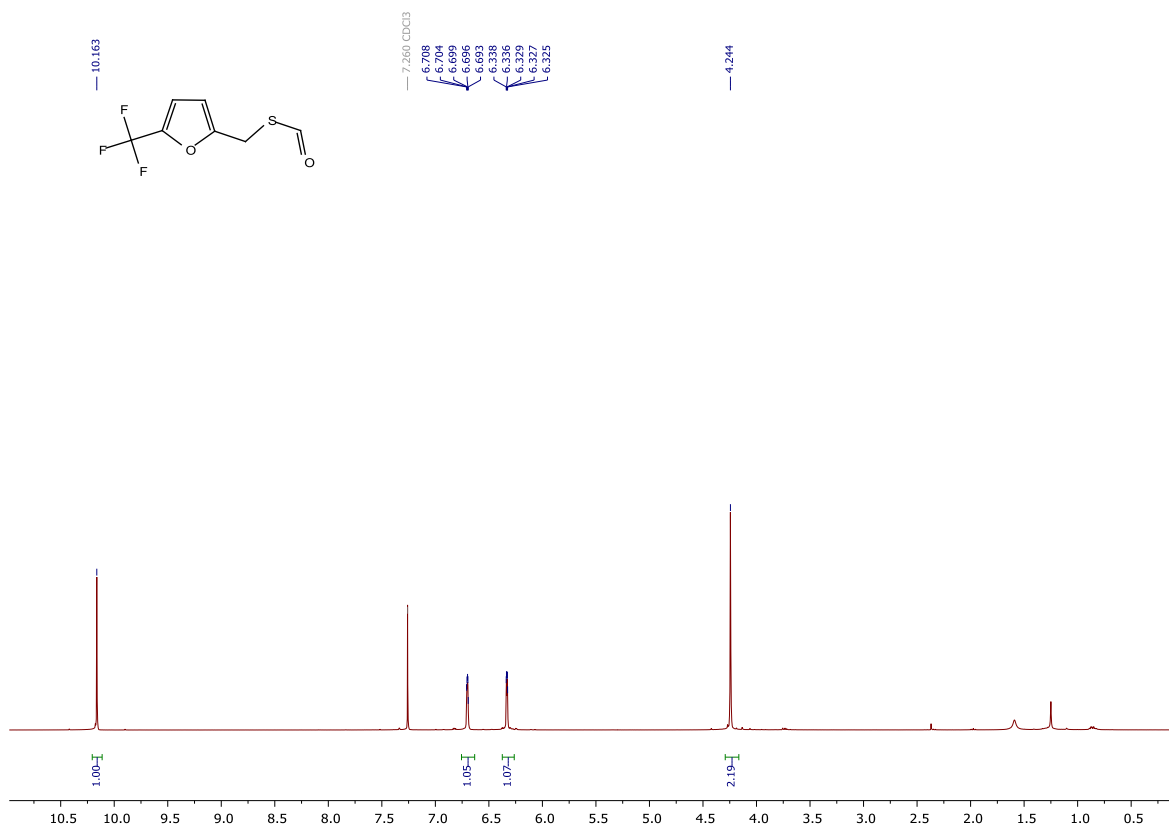

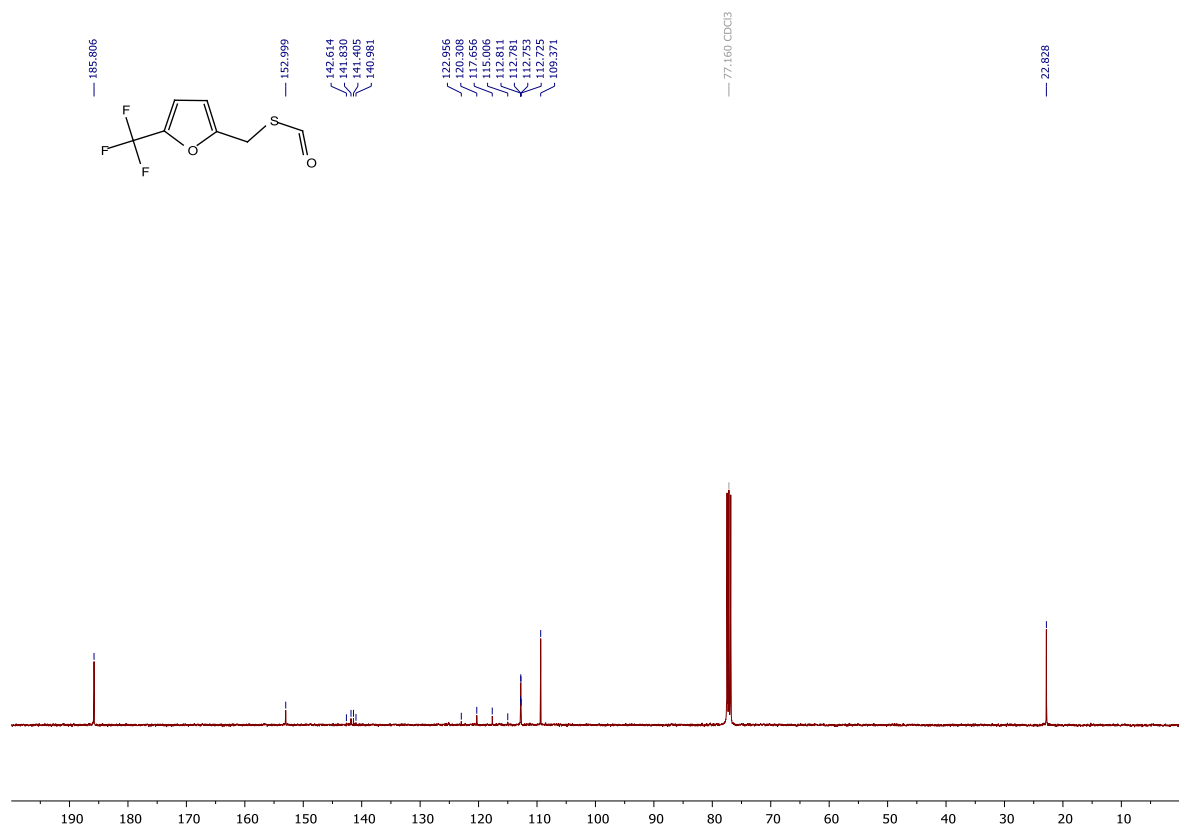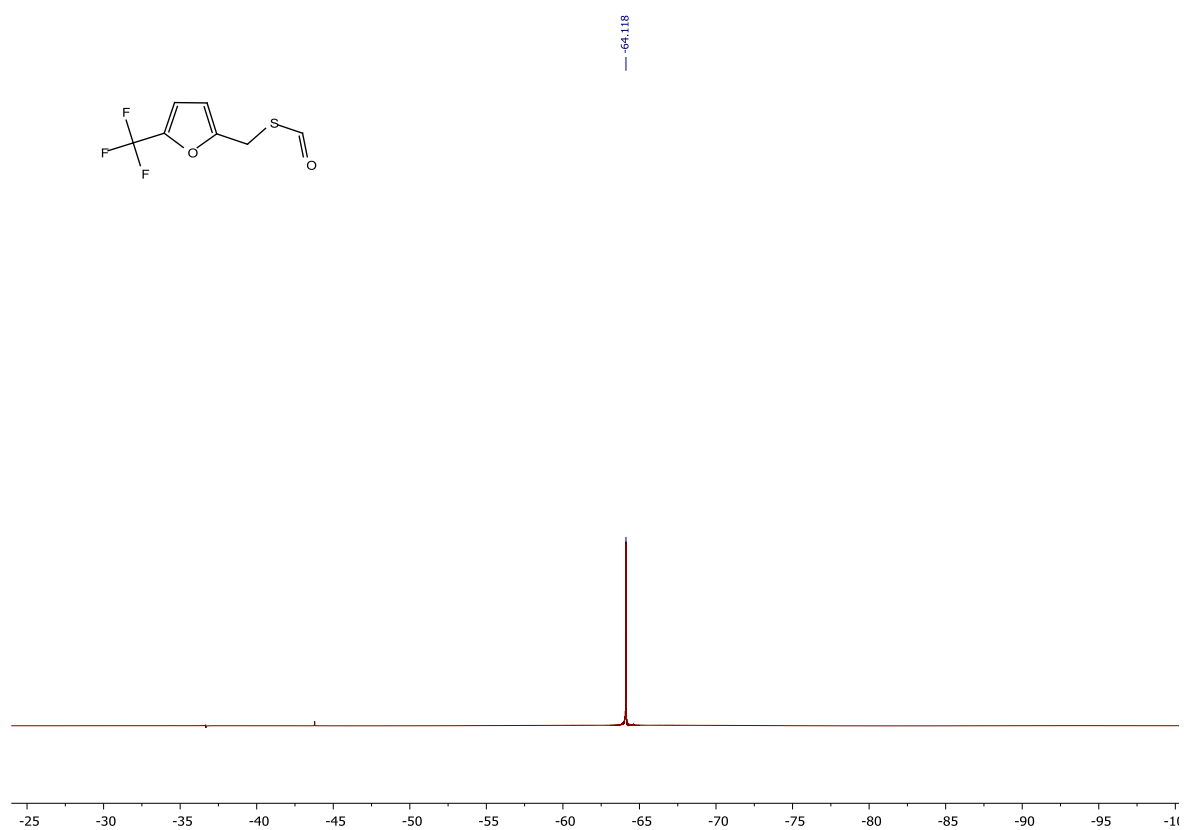

# 1,2,4,5-Tetramethyl-3-(trifluoromethyl)benzene (20)

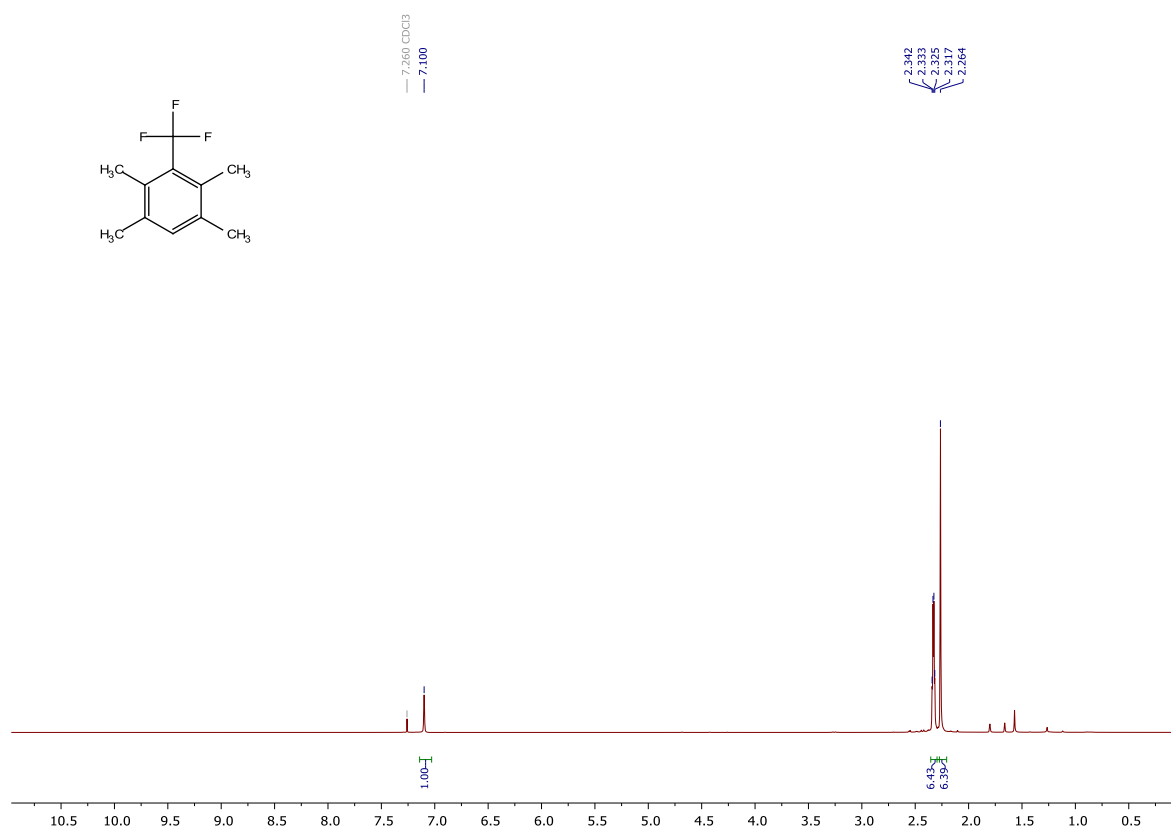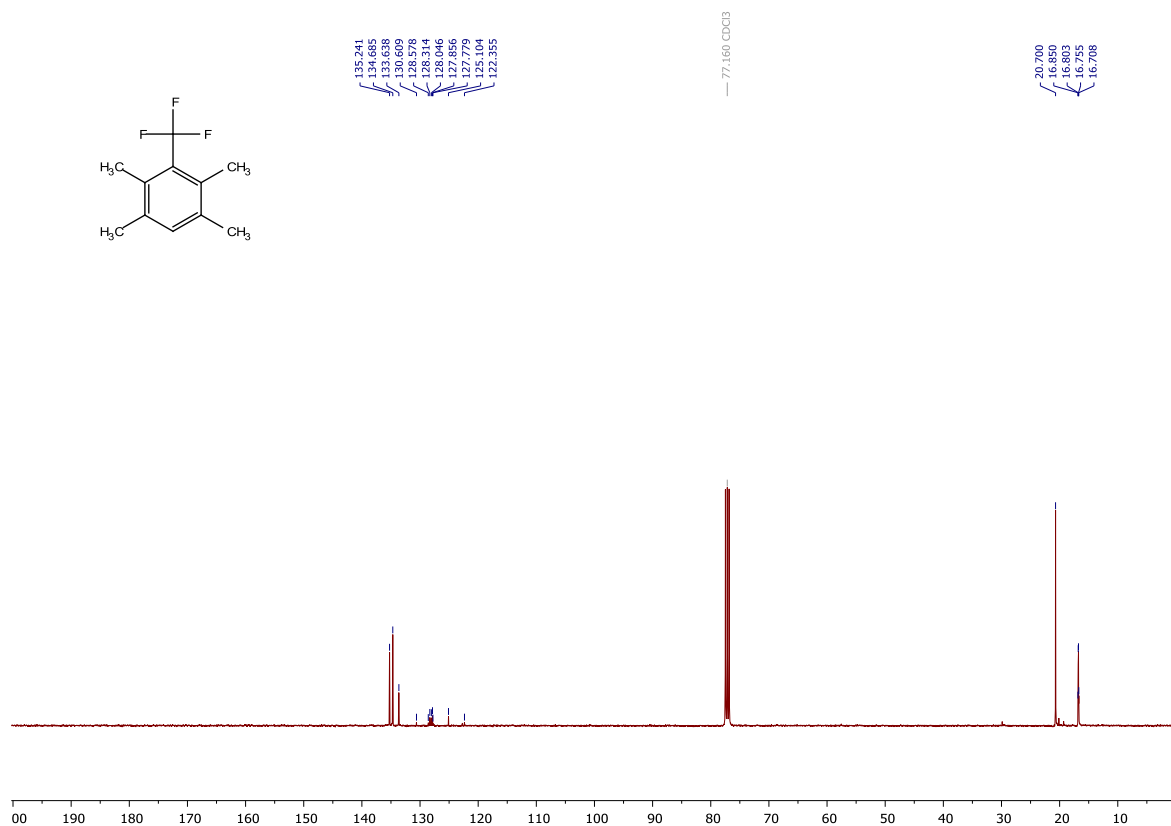

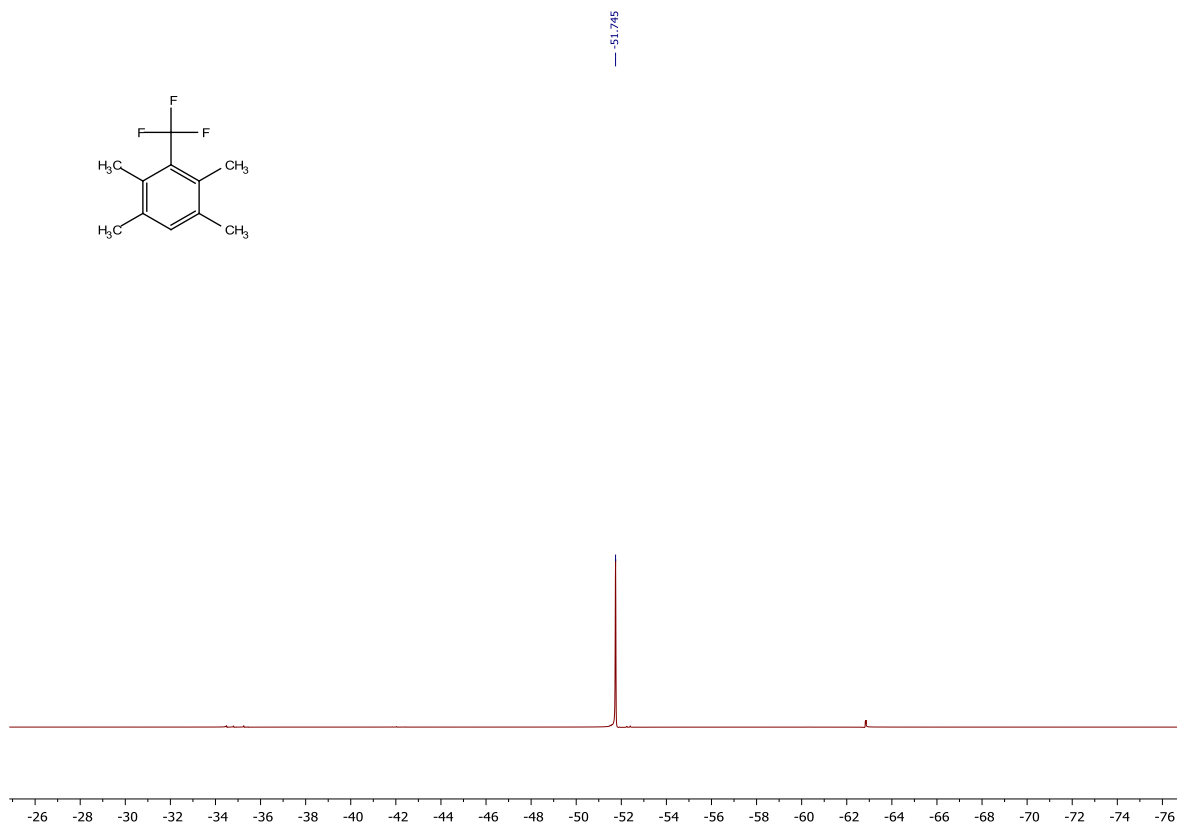

**1,3,5-Trimethoxy-2-(trifluoromethyl)benzene (22)**

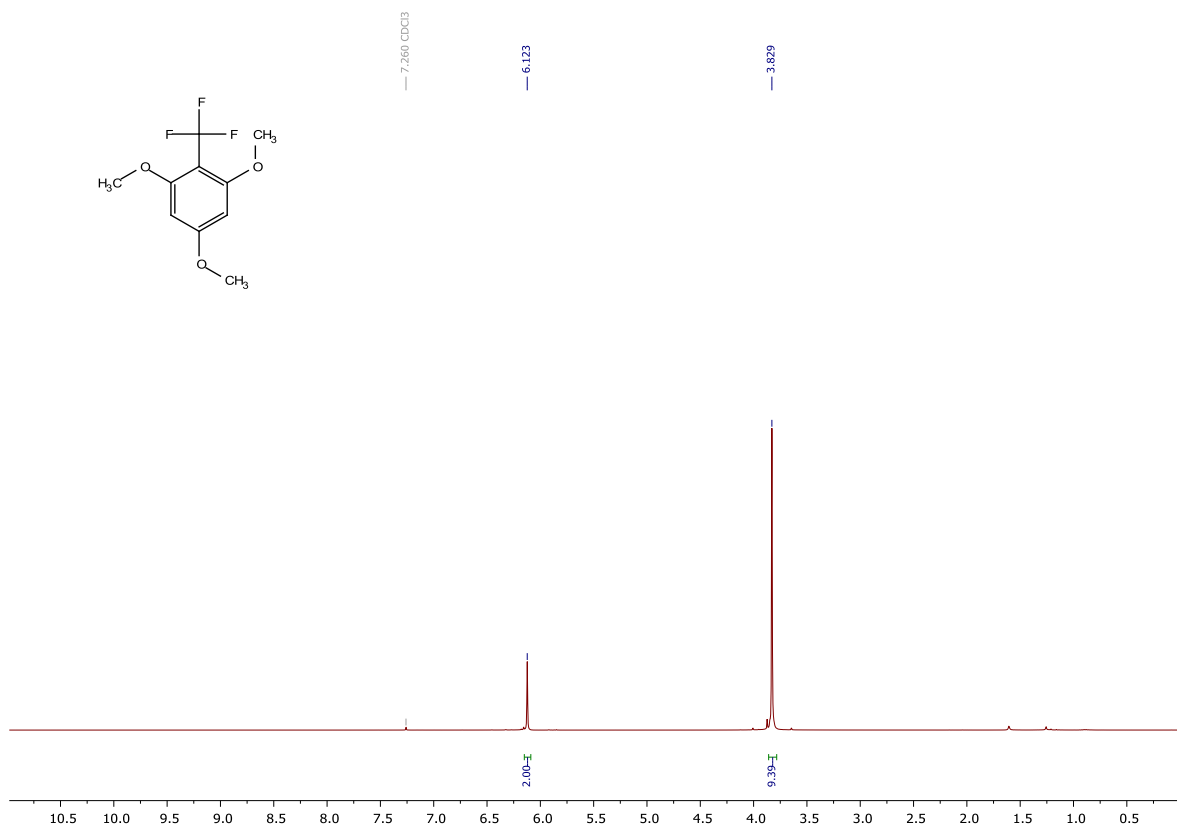

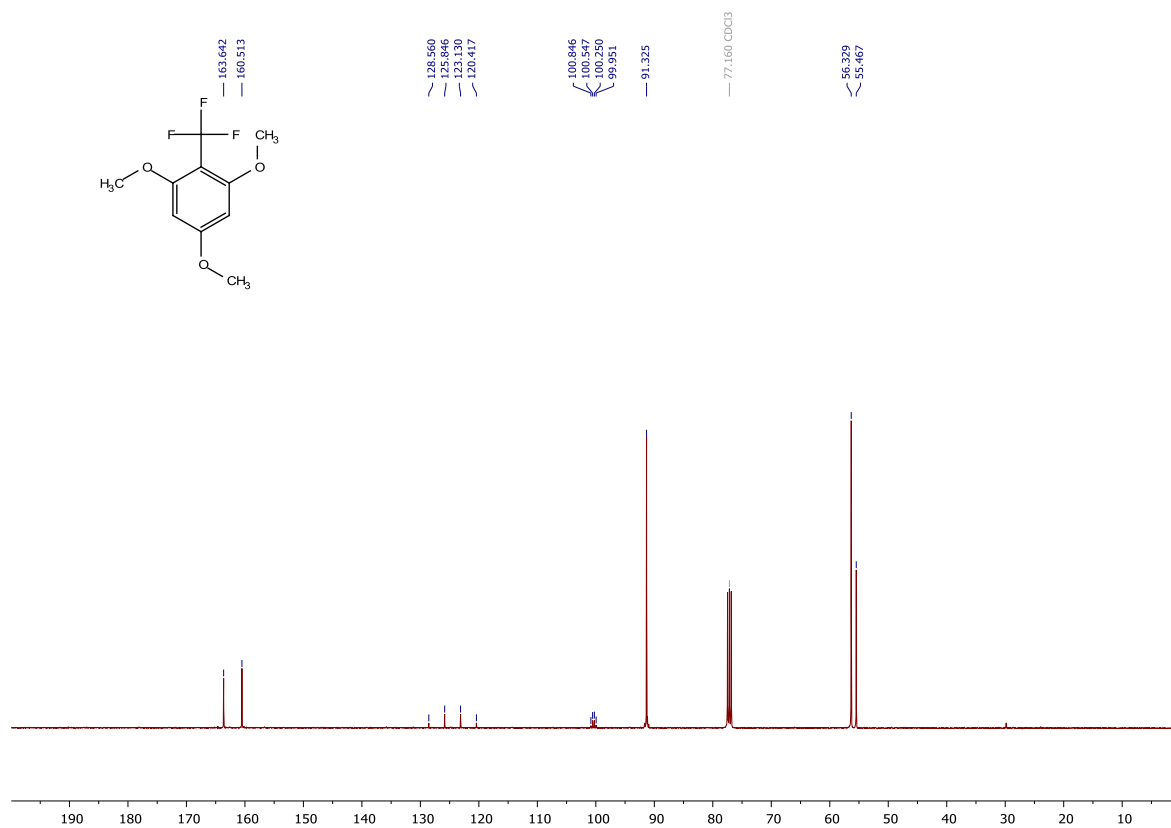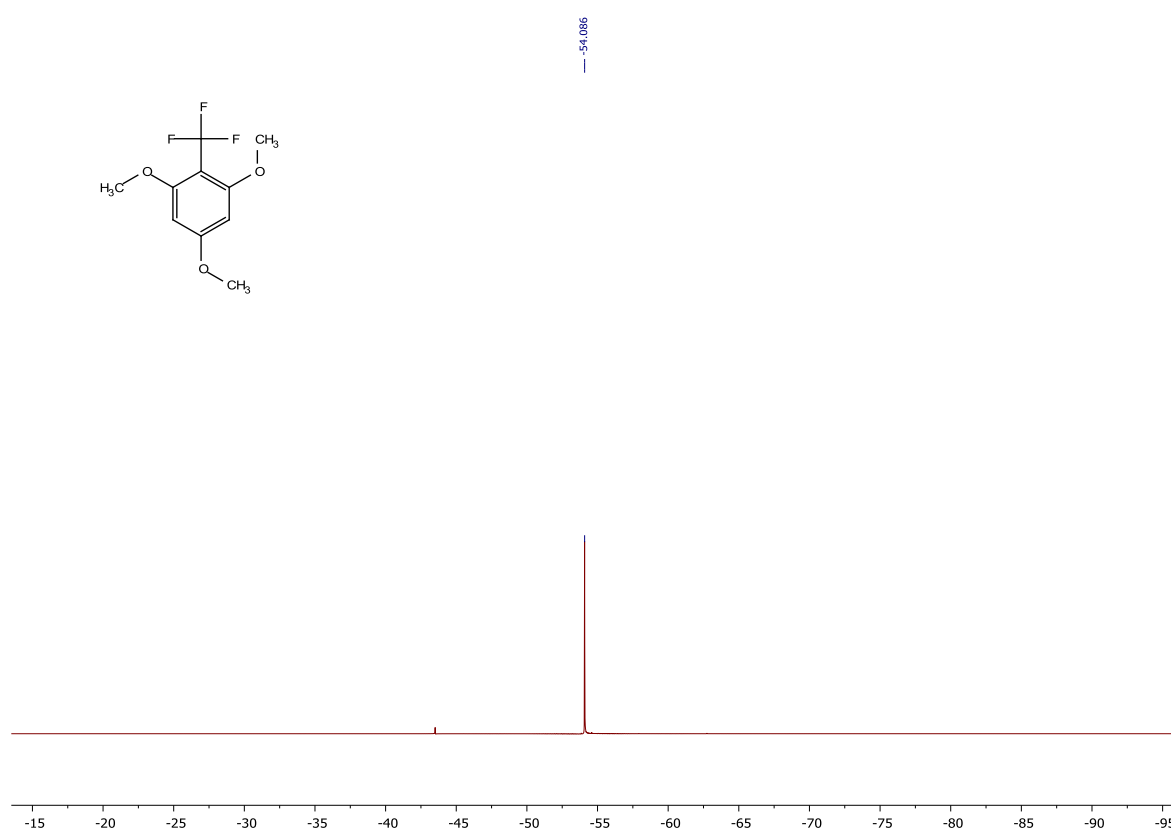

### 3,5-Dimethoxy-2-(trifluoromethyl)benzonitrile (23)

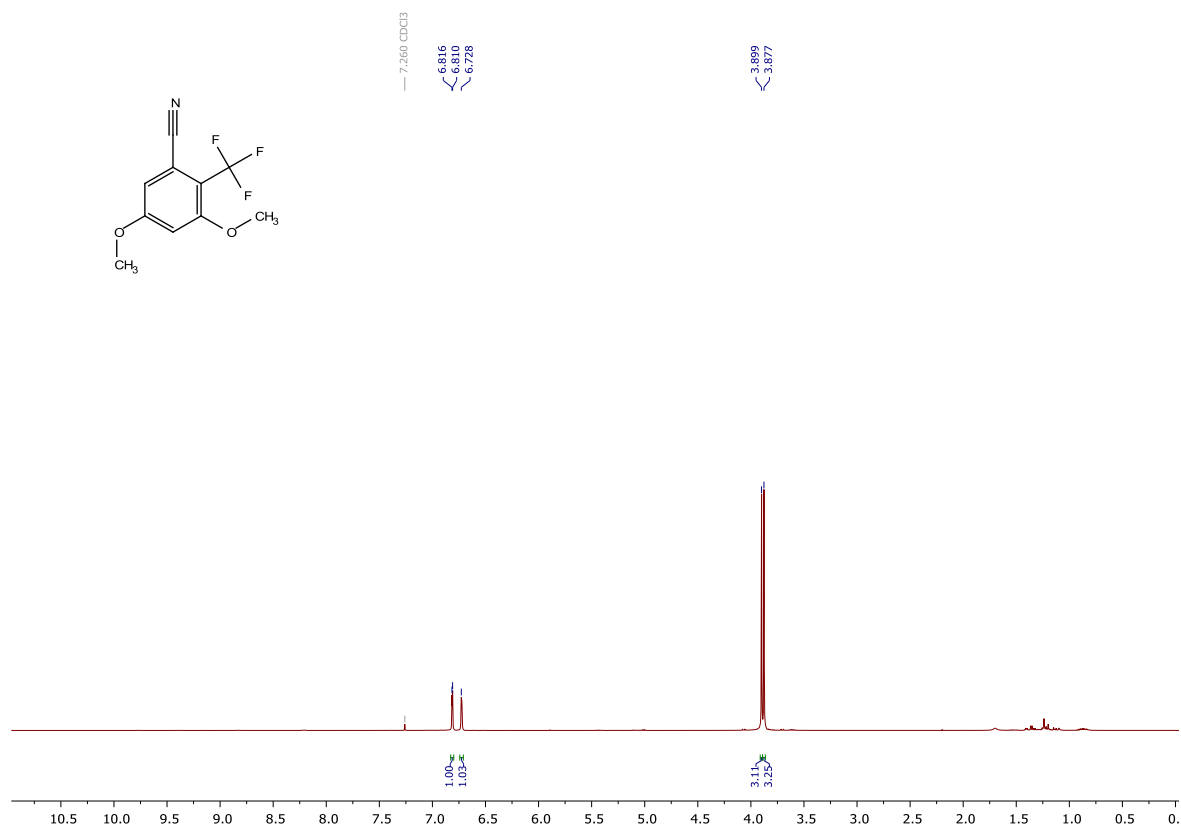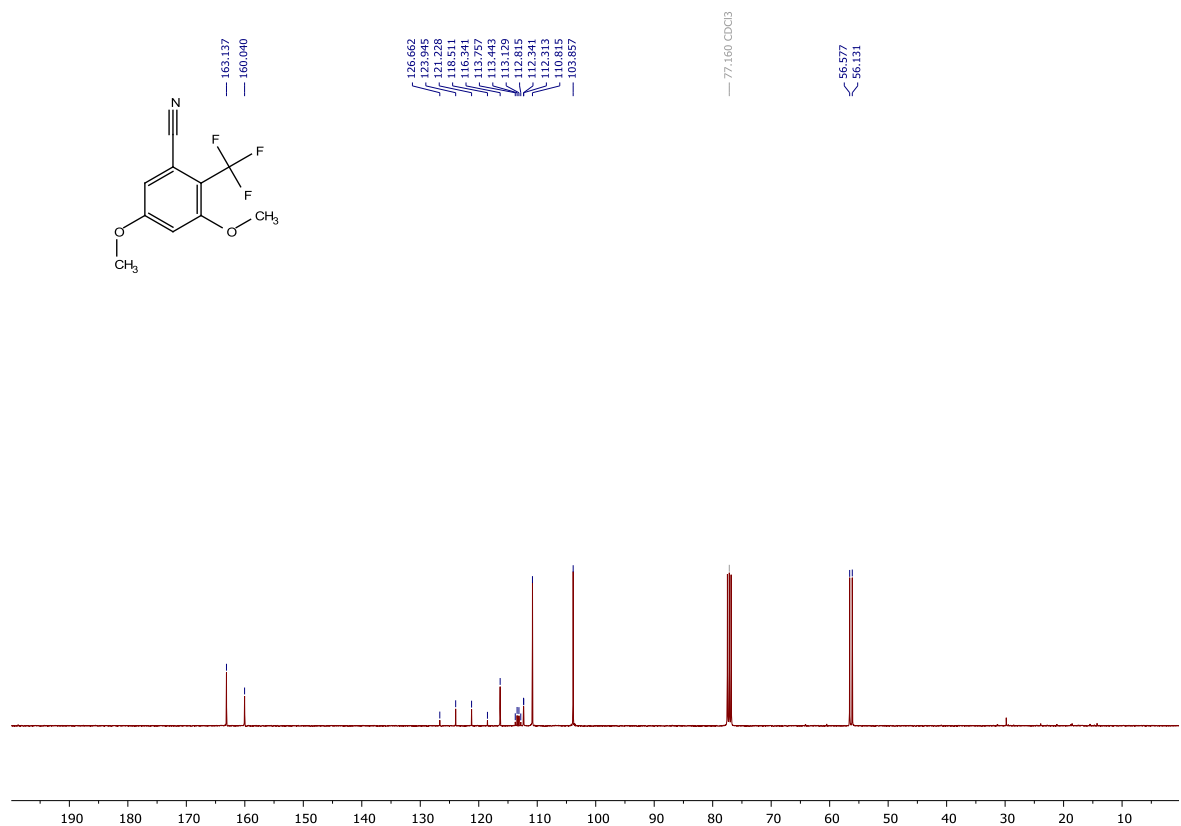

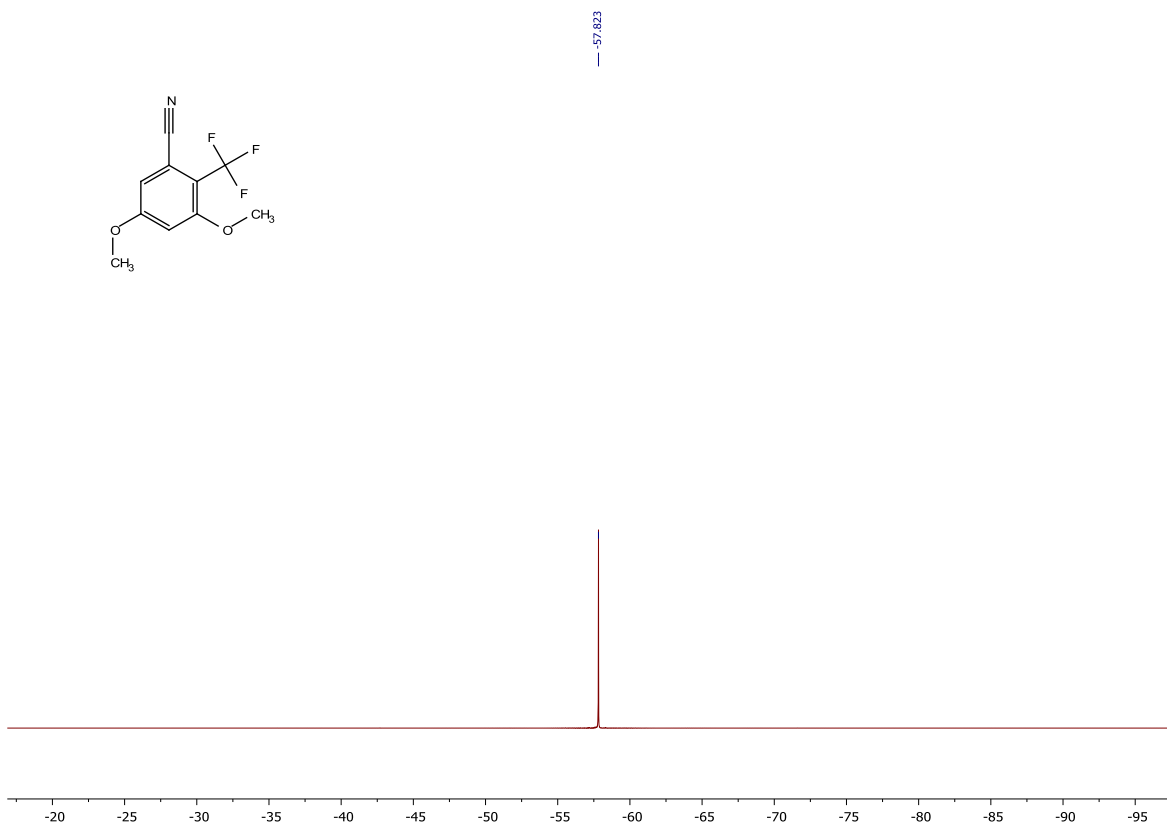

**3,4,5-Trimethoxy-2-(trifluoromethyl)benzaldehyde (24)**

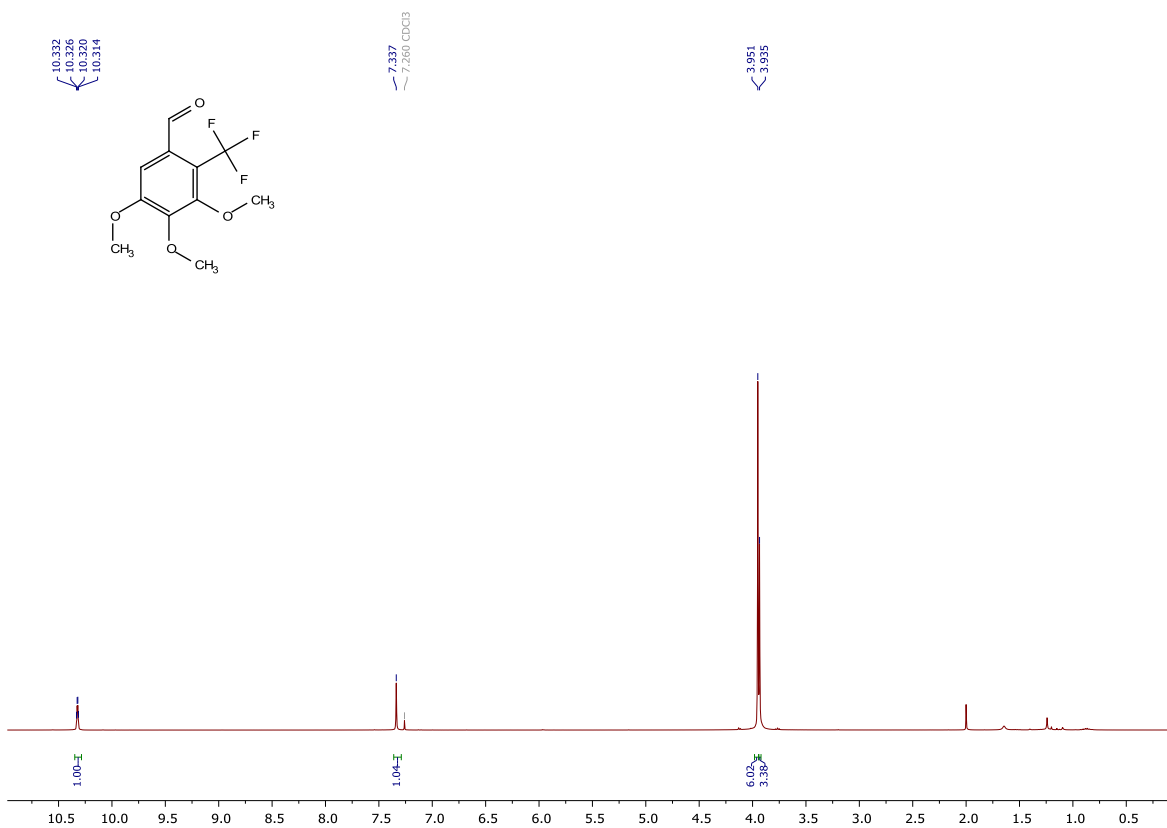



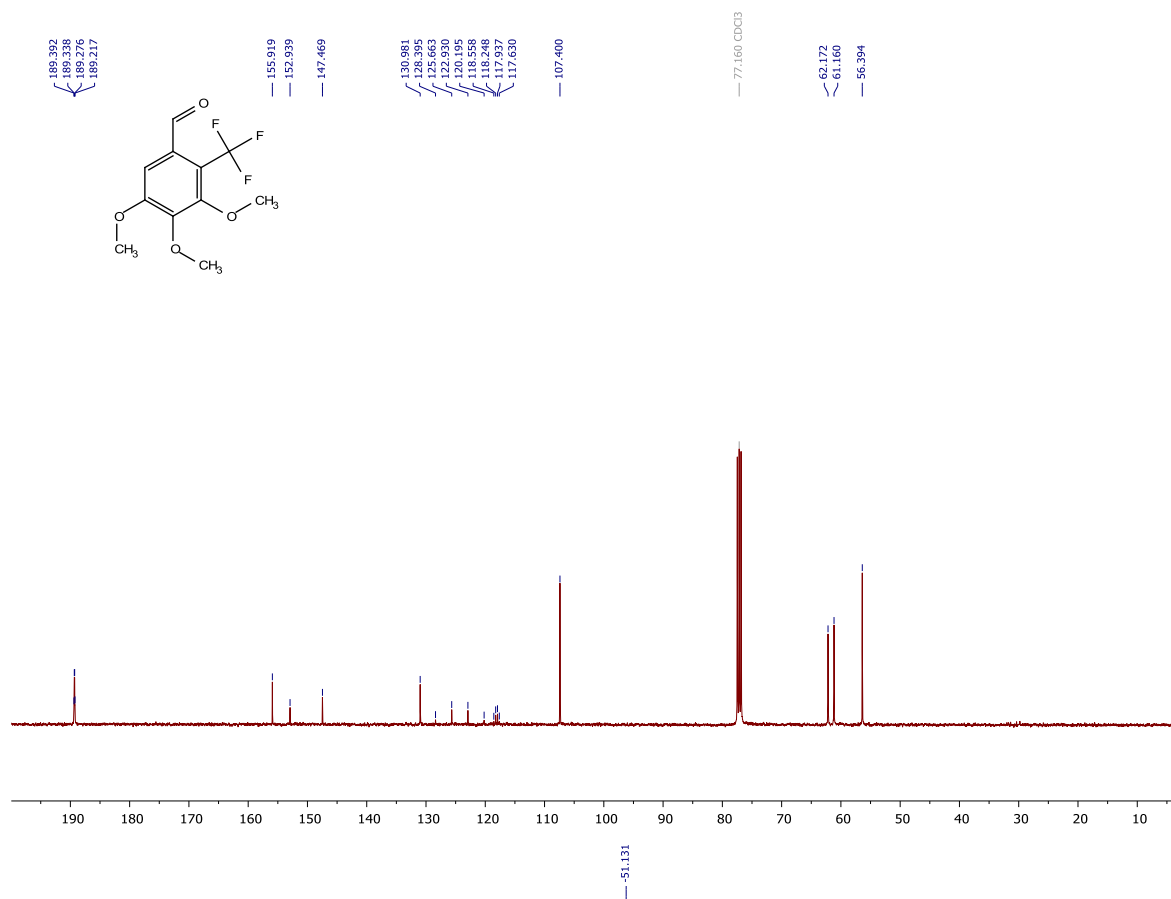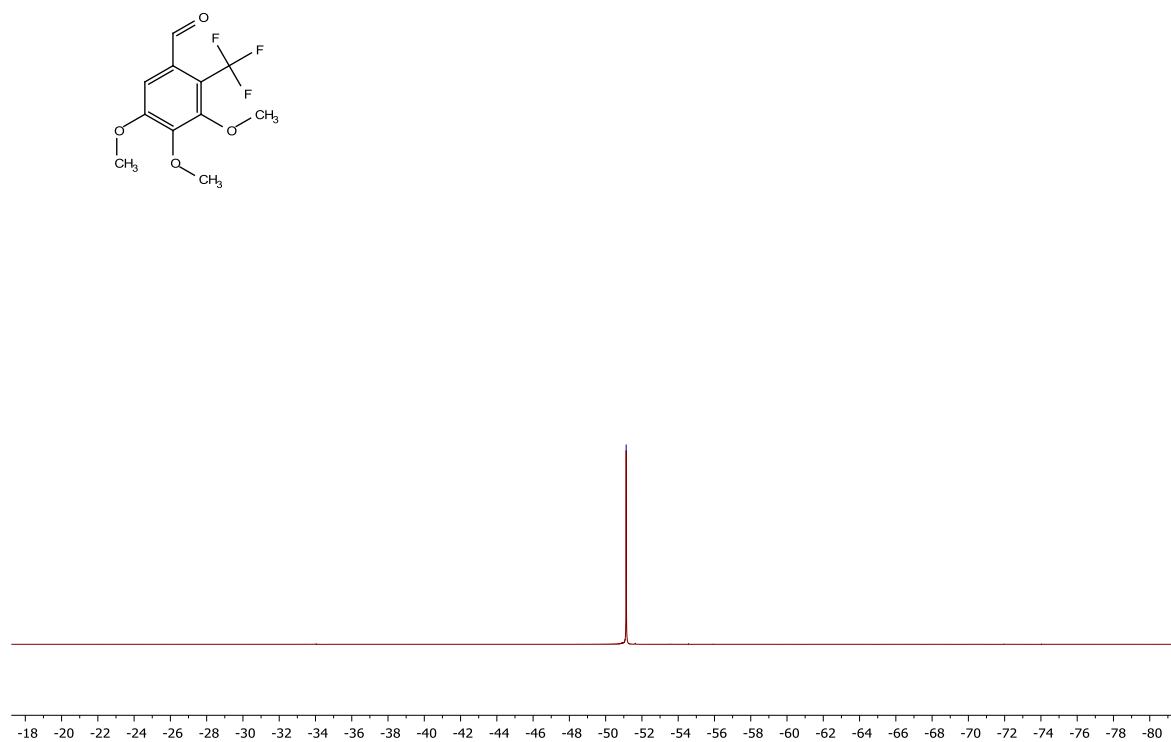

# 4-Methoxy-N,N-dimethyl-2-(trifluoromethyl)aniline (25)

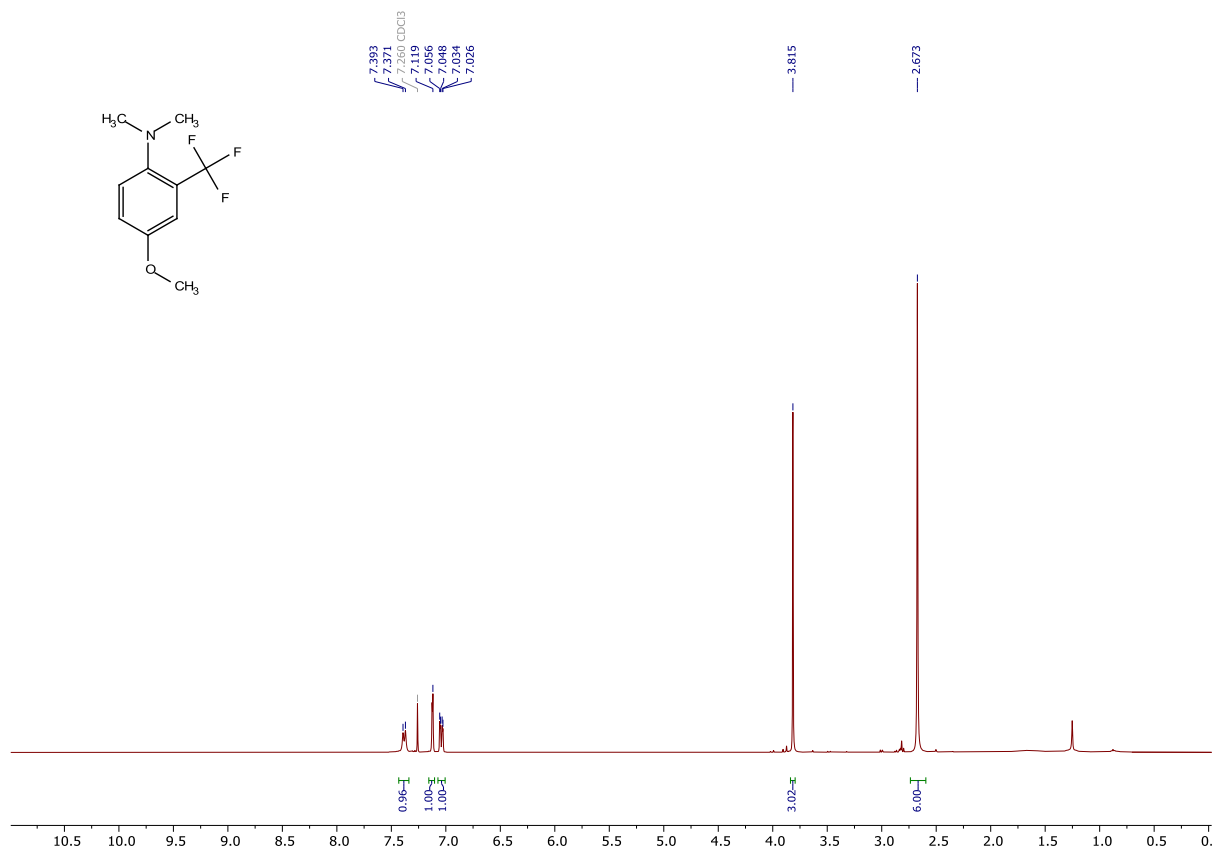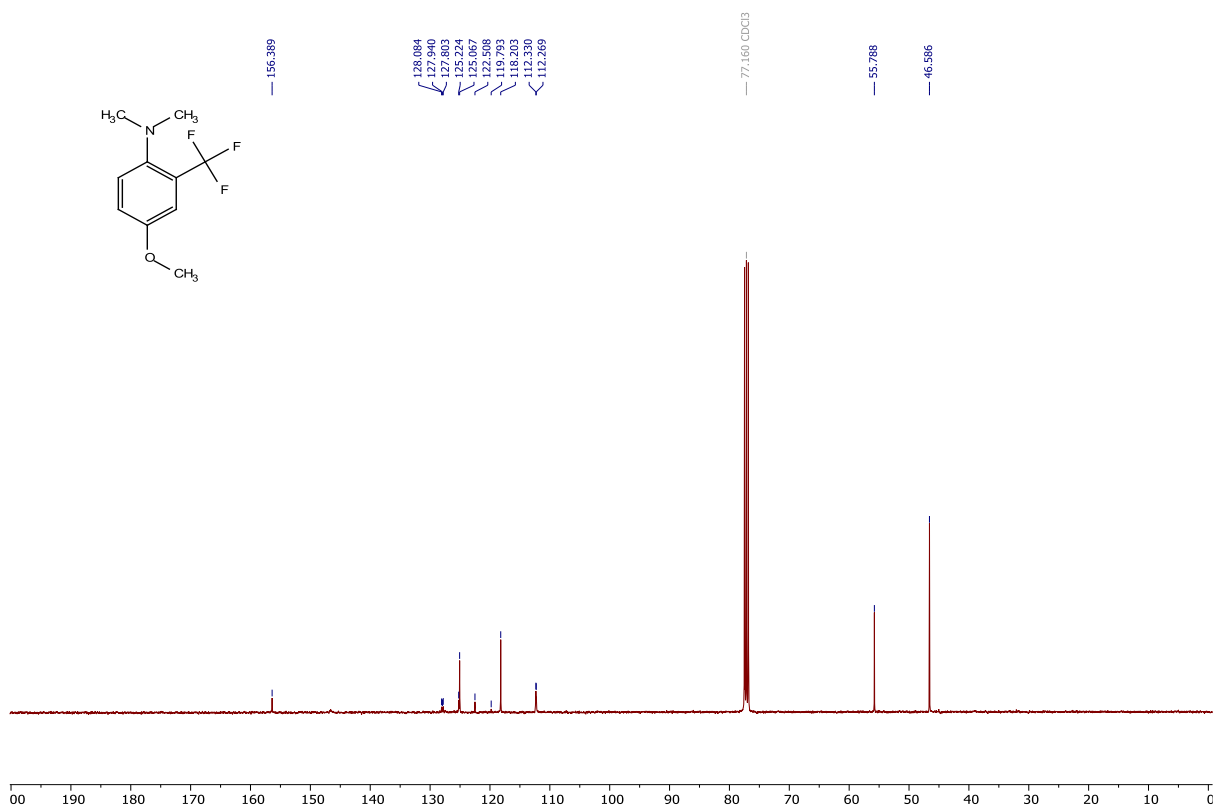

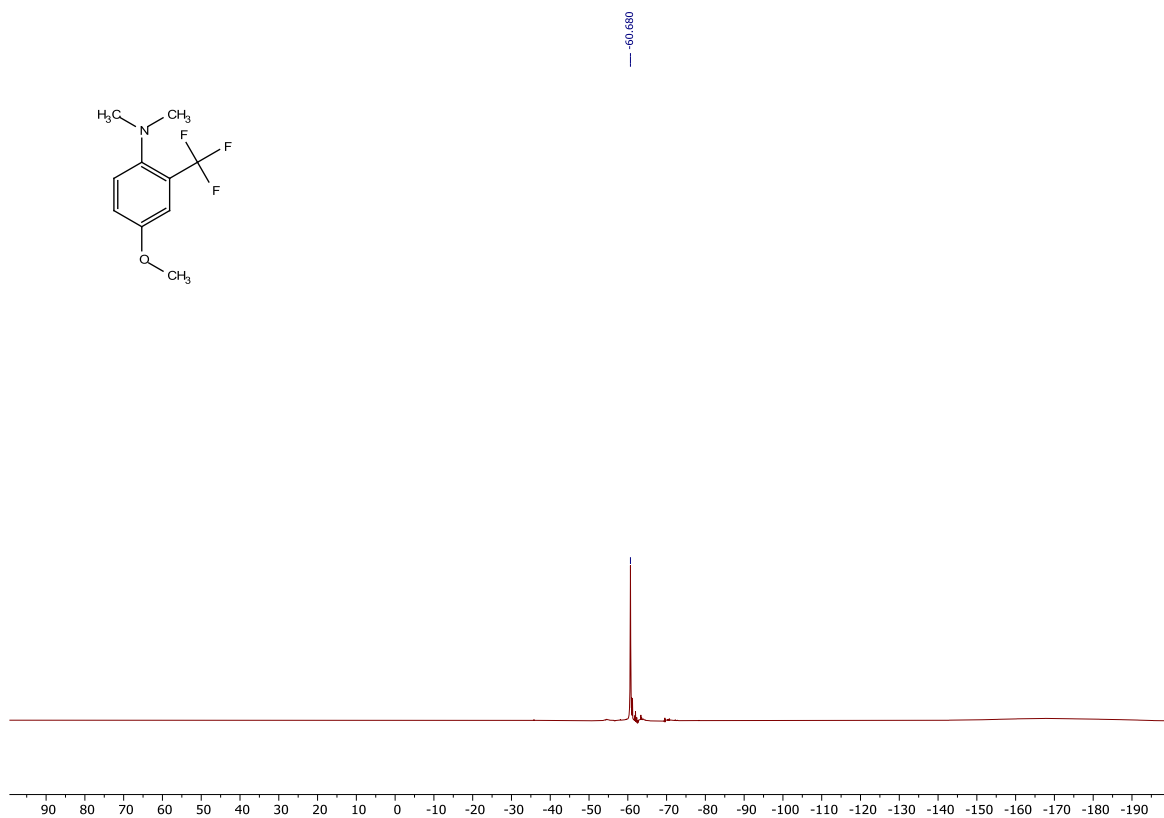

### 1-Methoxy-2-methyl-5-nitro-3-(trifluoromethyl)benzene (26)

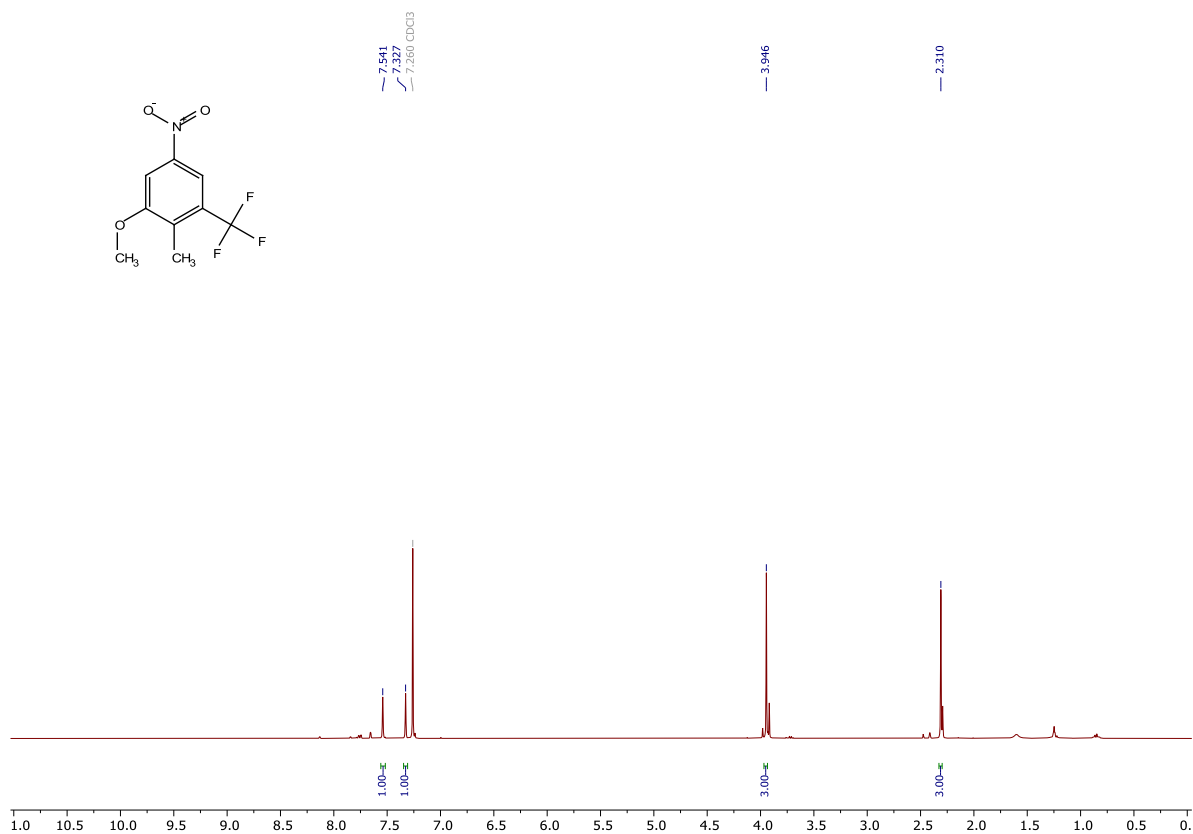

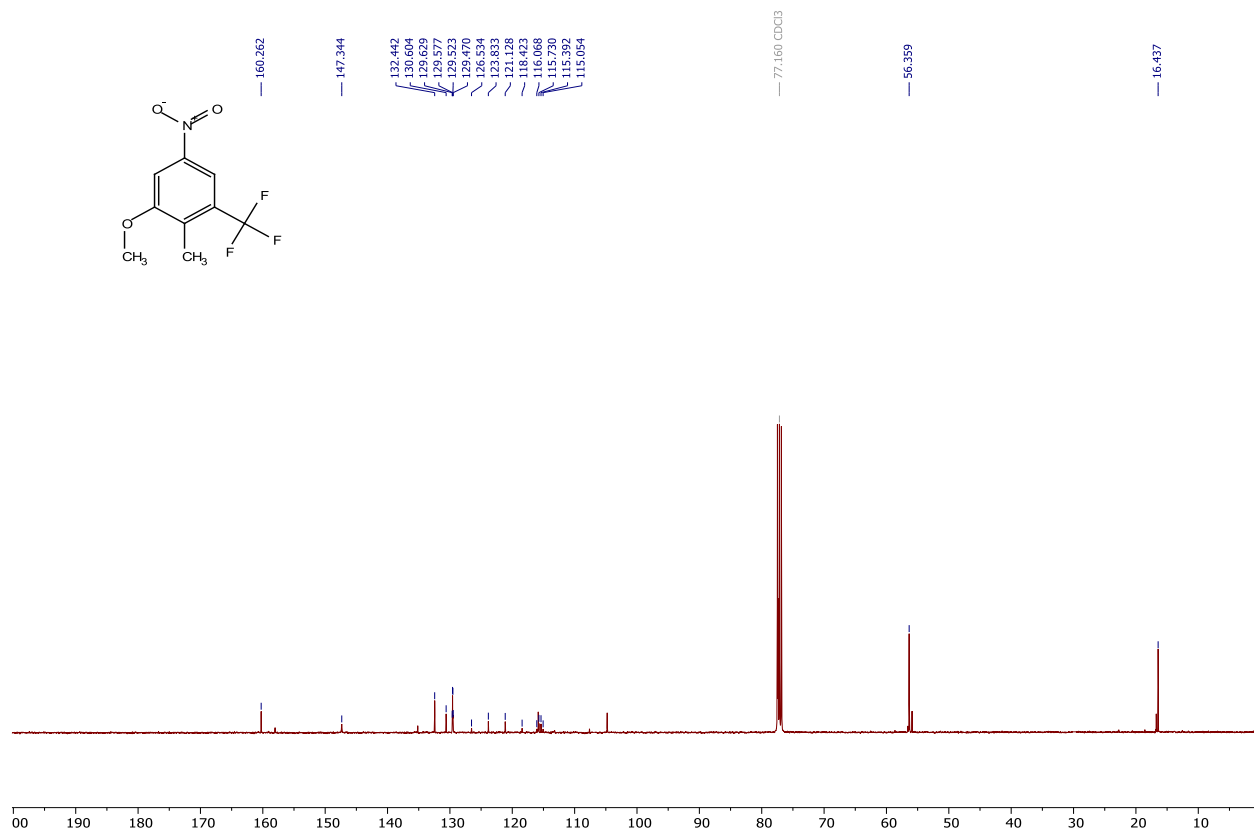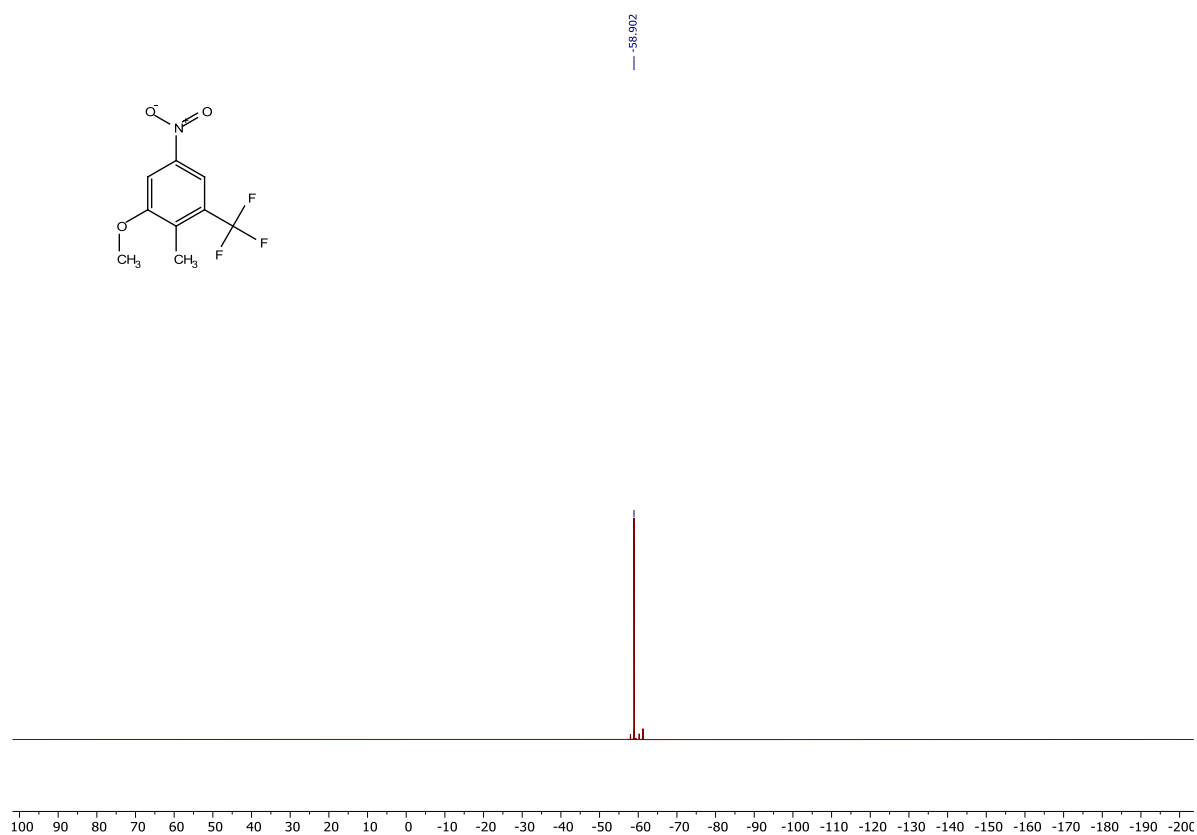

## 2-Methyl-3-(6-(trifluoromethyl)benzo[d][1,3]dioxol-5-yl)propanal (27)

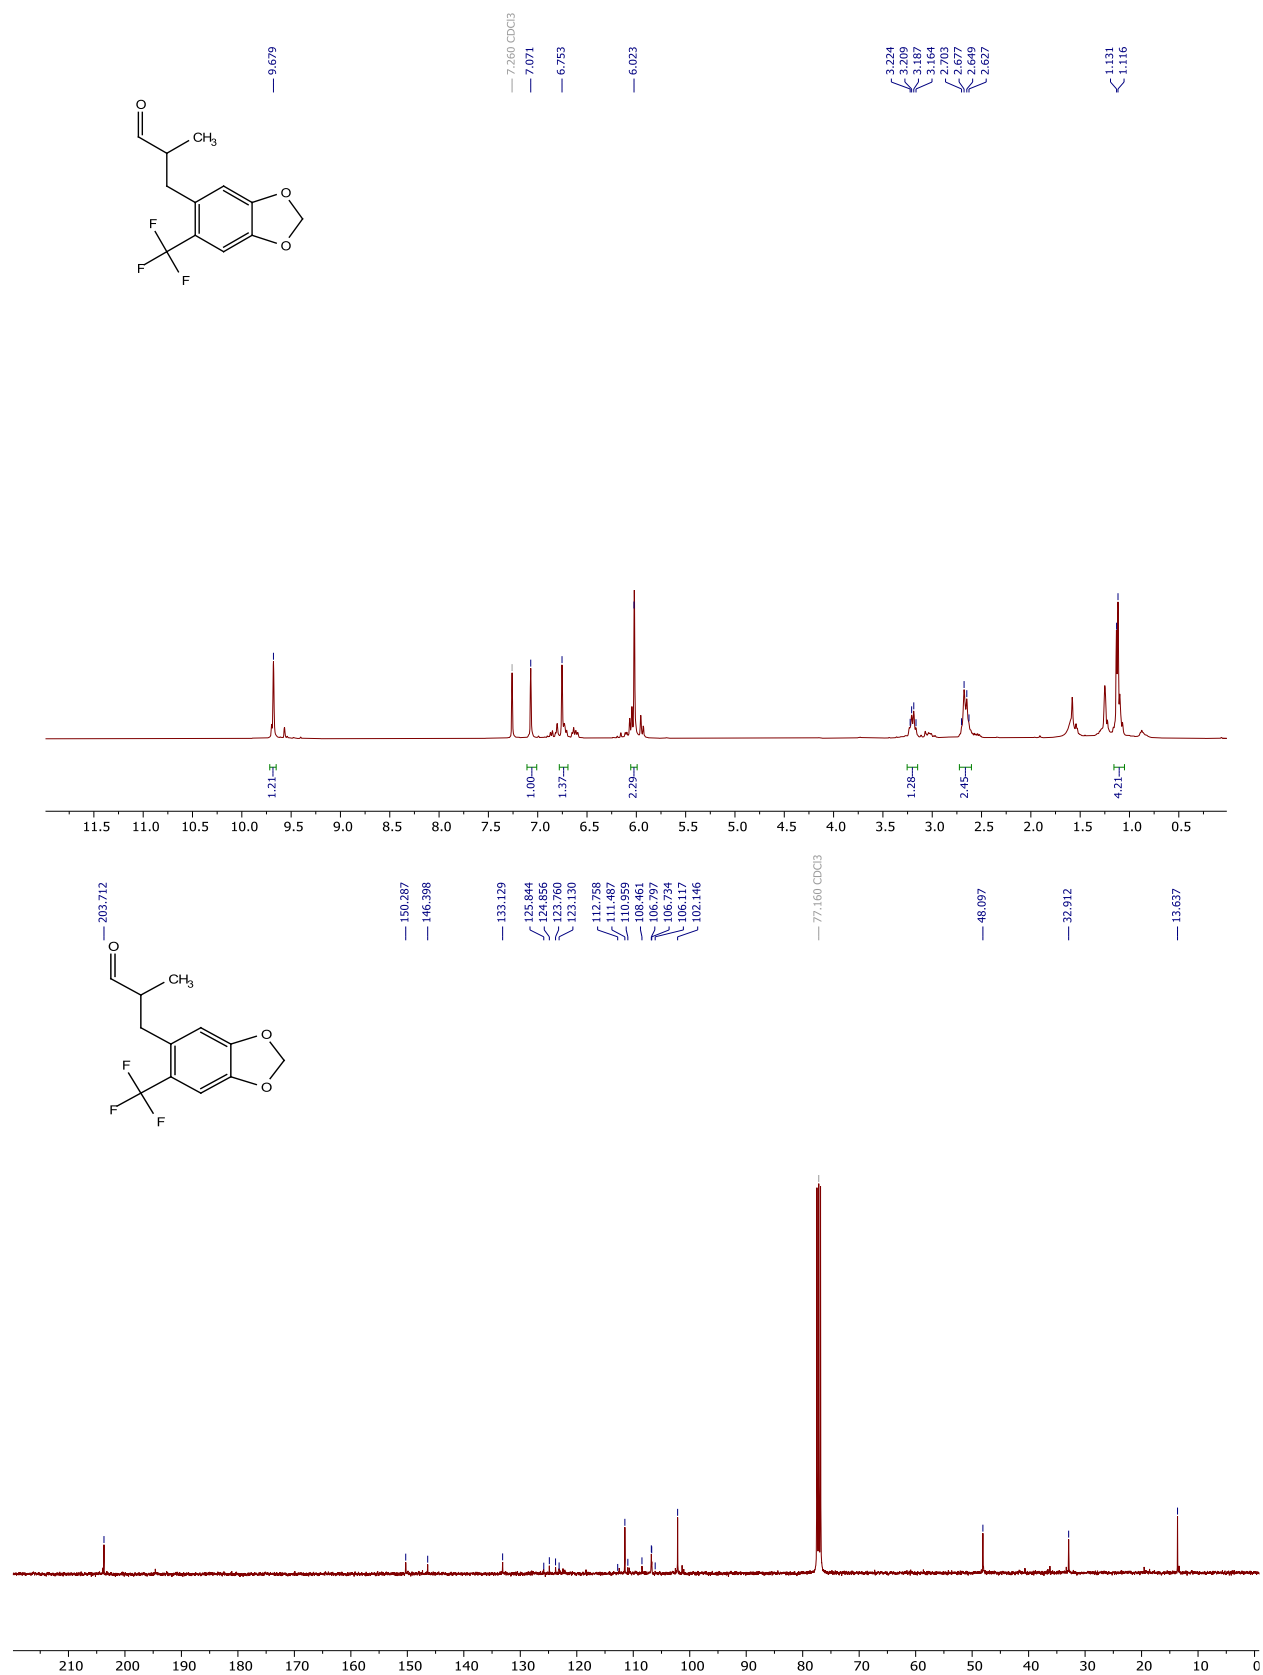

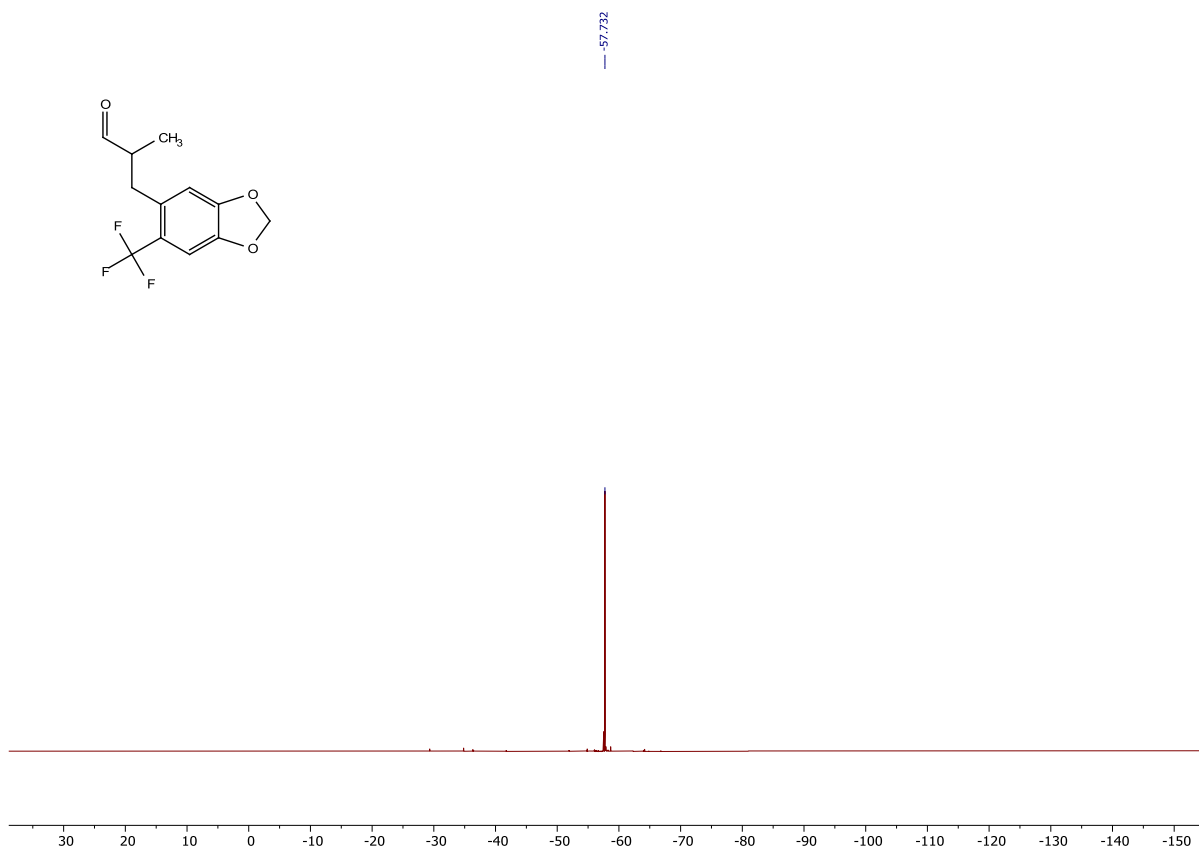

**1,3-Dimethyl-3-(2,2,2-trifluoroethyl)indolin-2-one (28)**

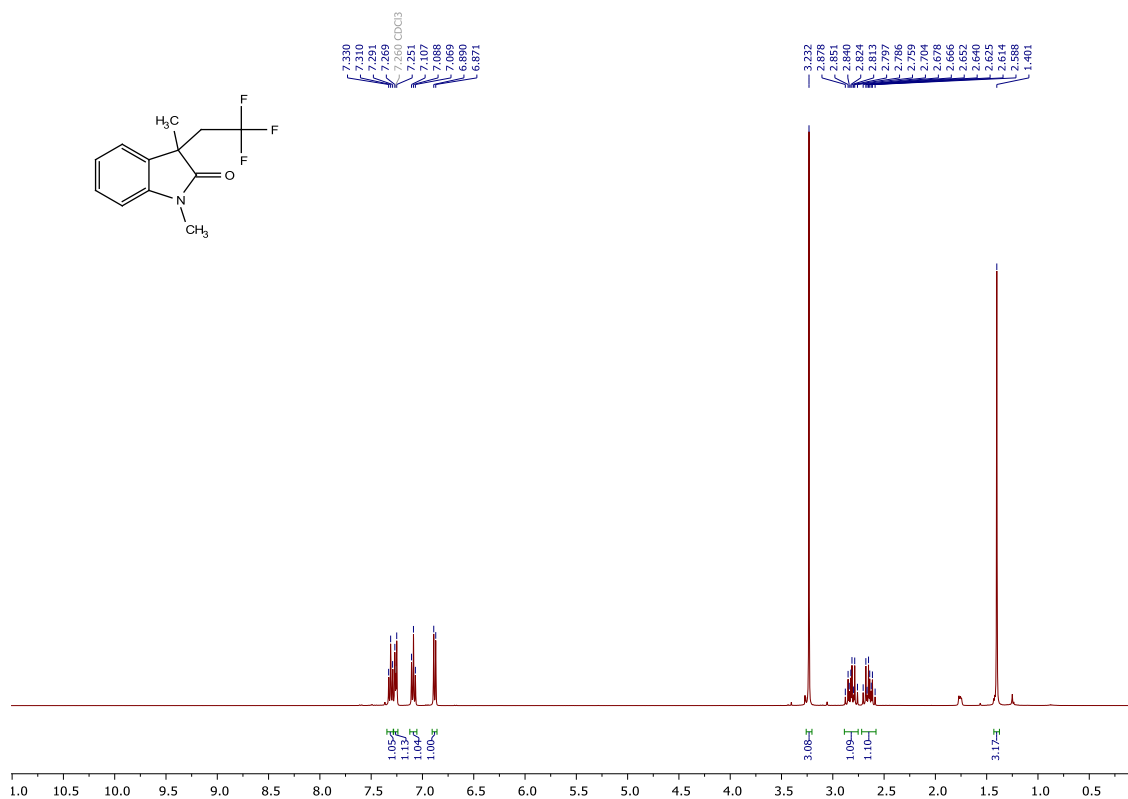

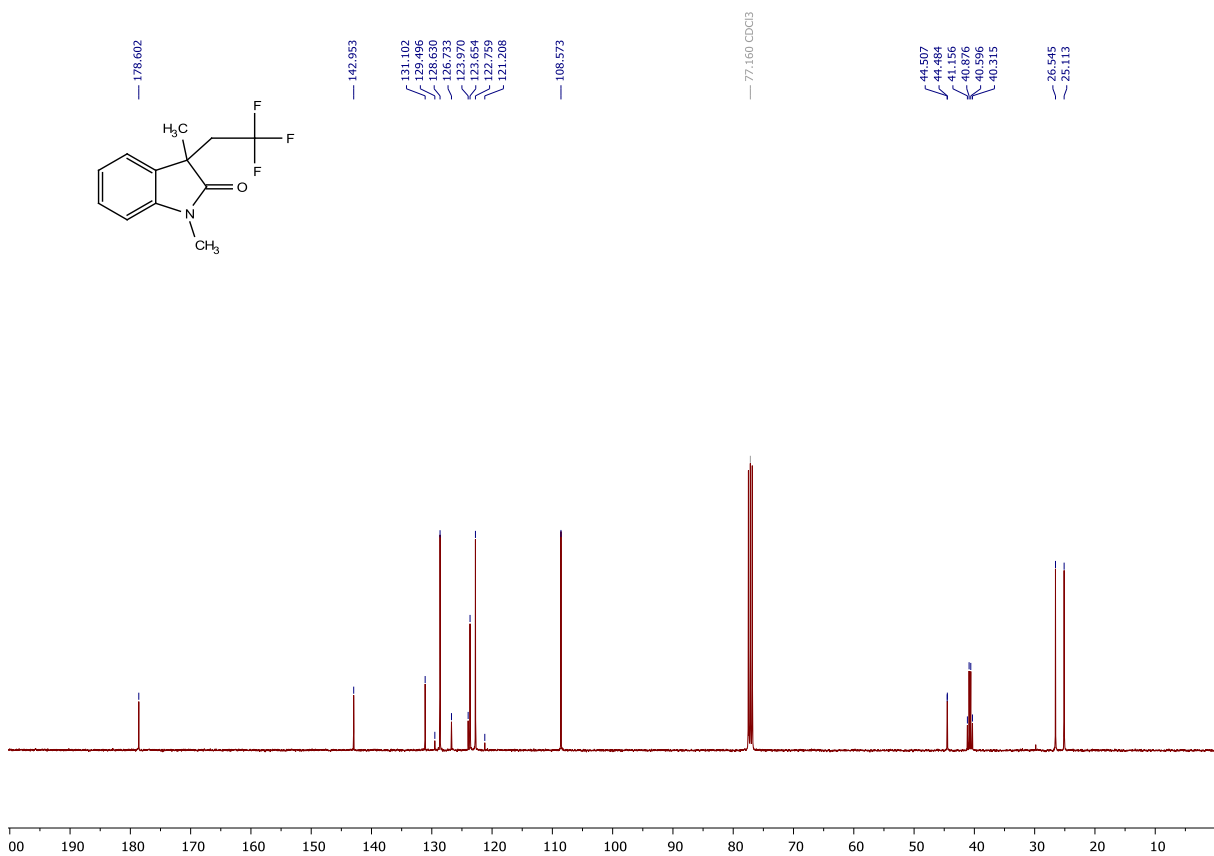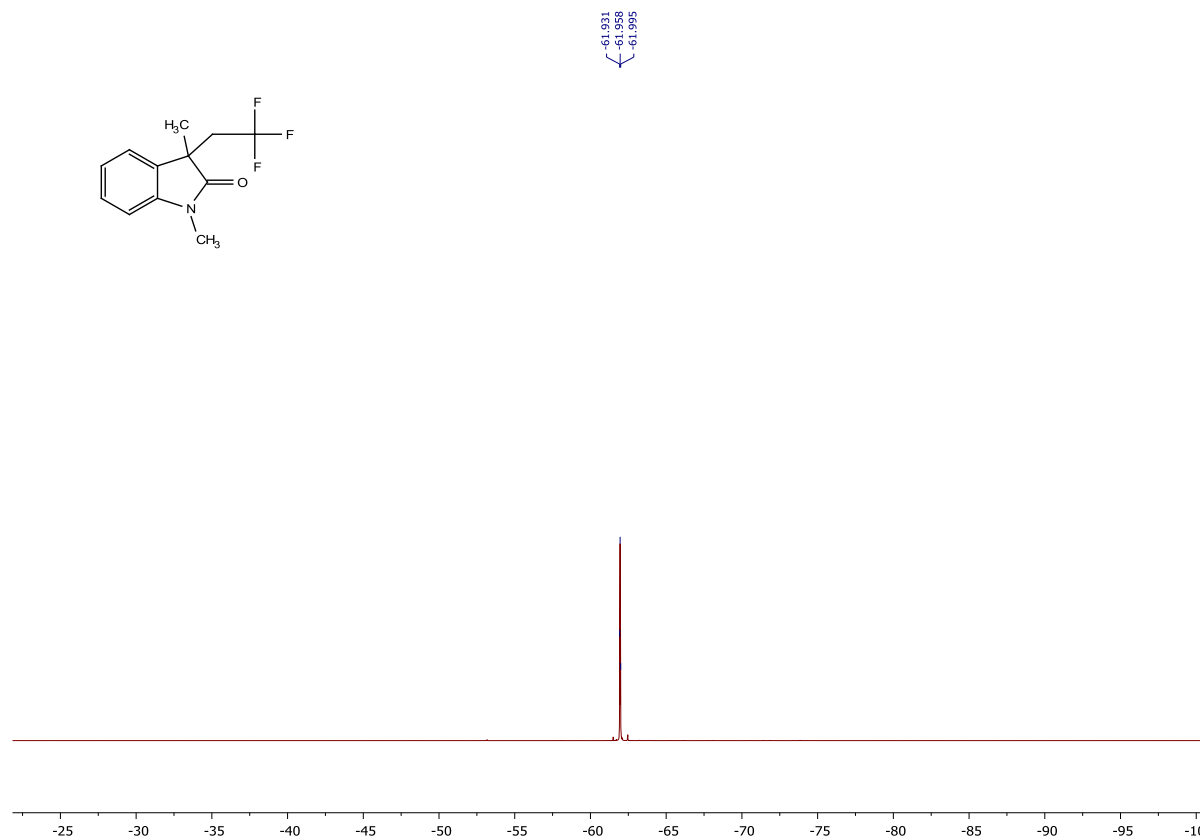

# 1,3,5-Trimethyl-3-(2,2,2-trifluoroethyl)indolin-2-one (29)

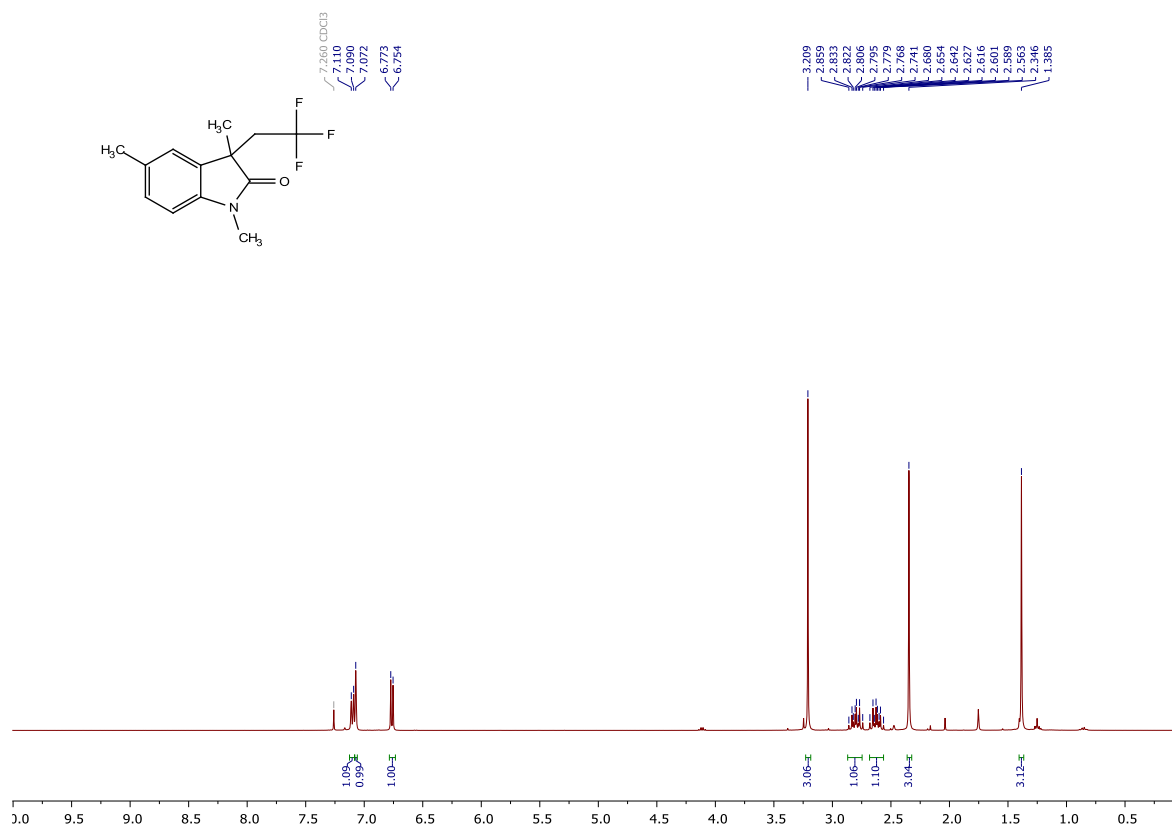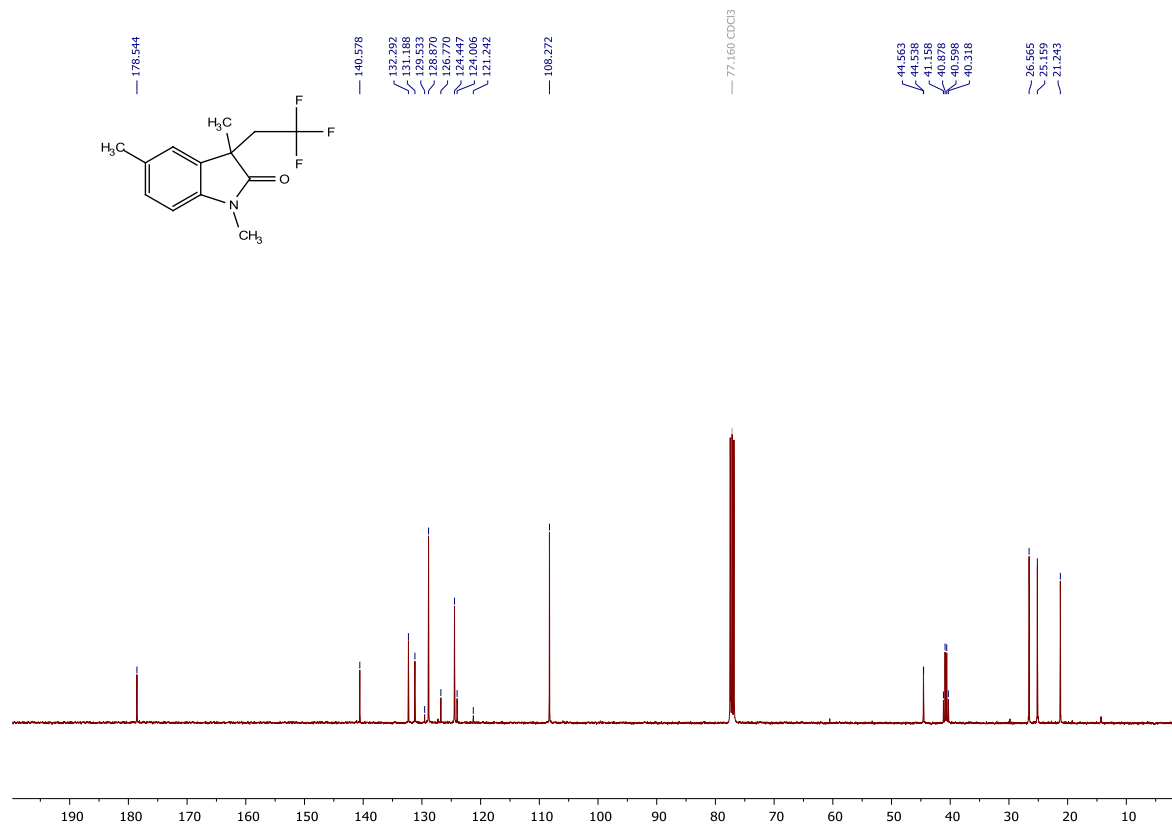



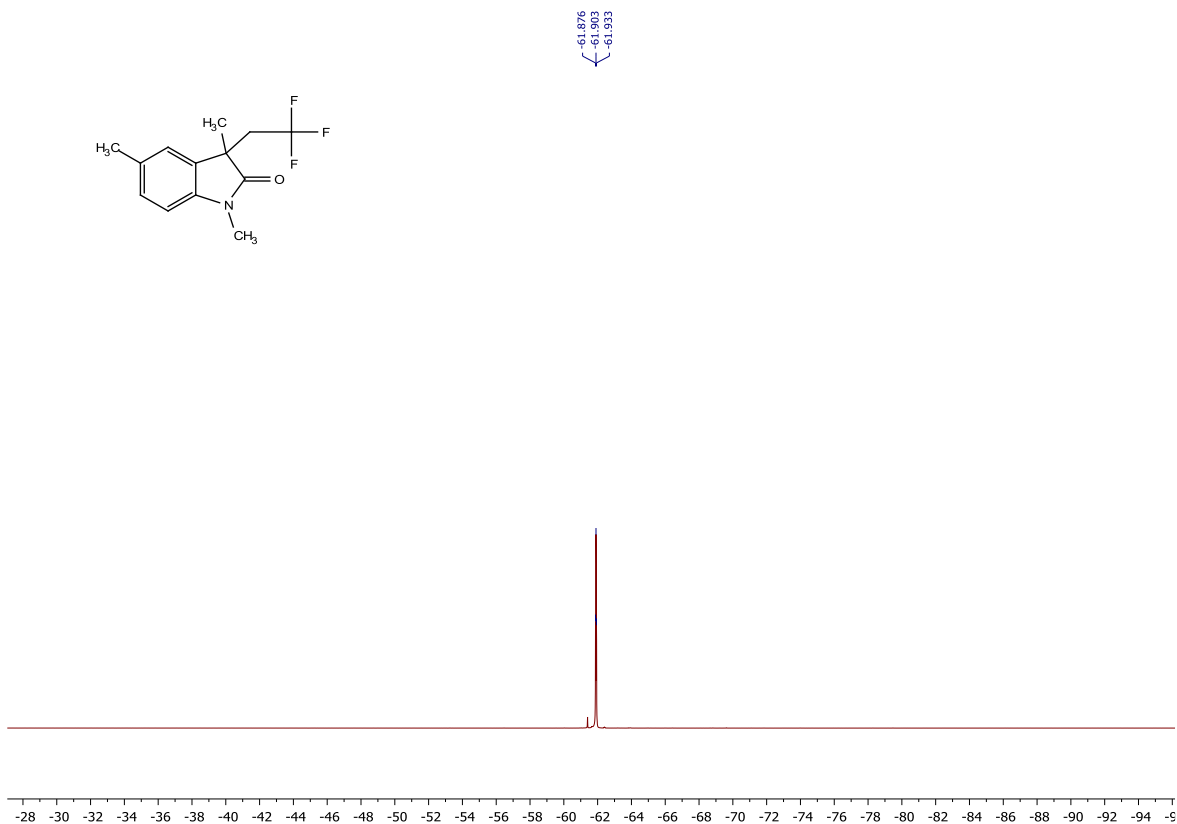

### 5-Methoxy-1,3-dimethyl-3-(2,2,2-trifluoroethyl)indolin-2-one (30)

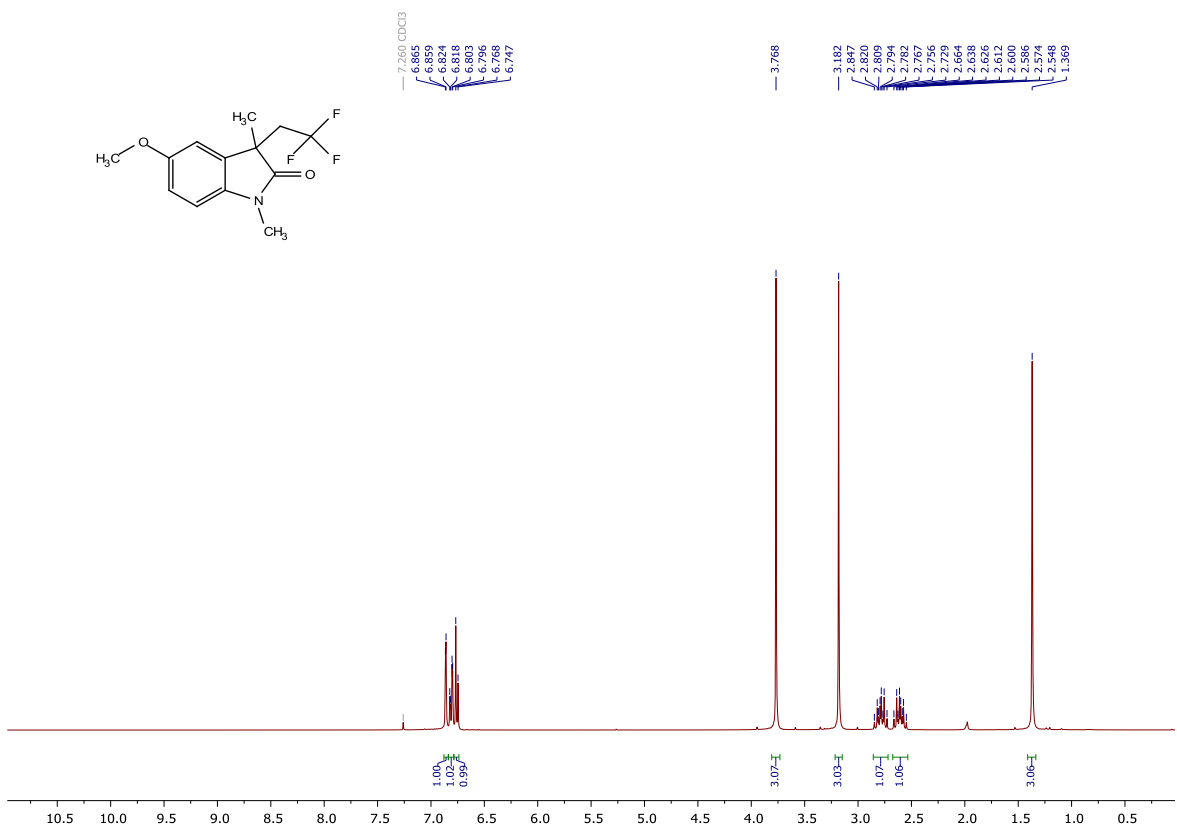

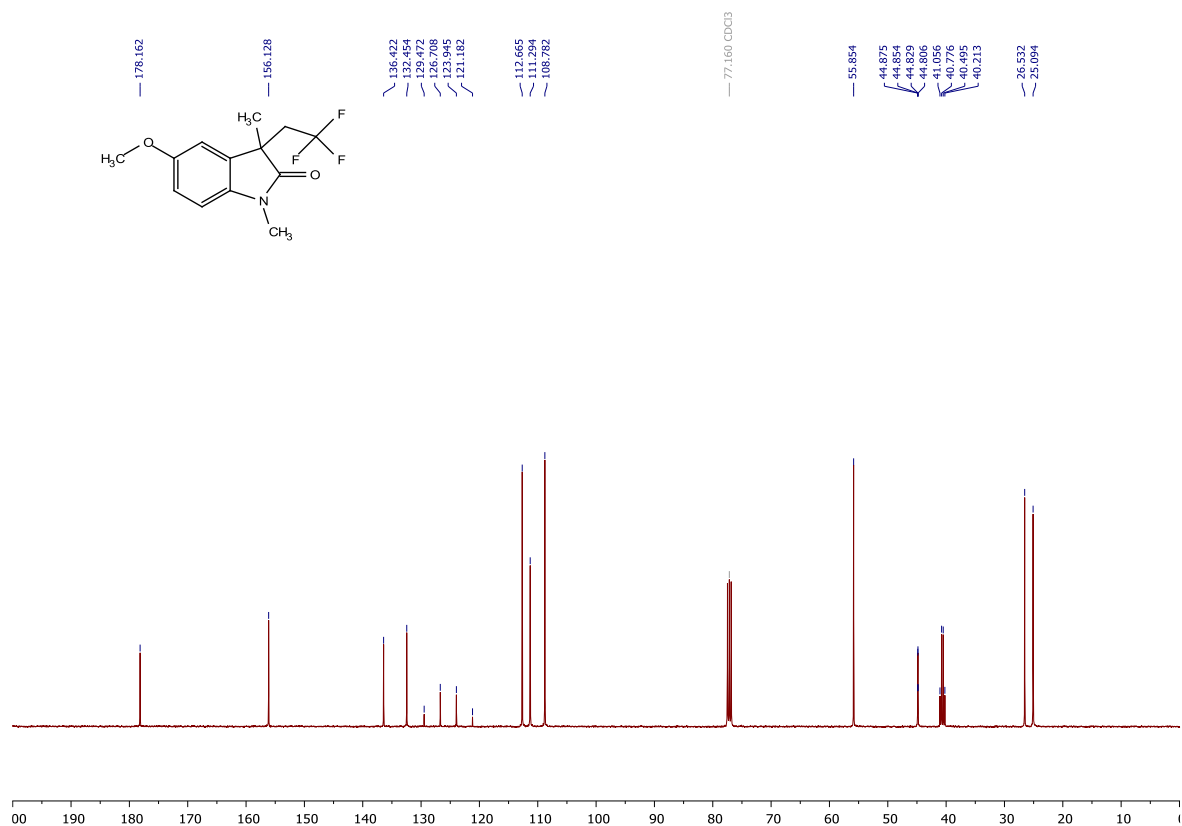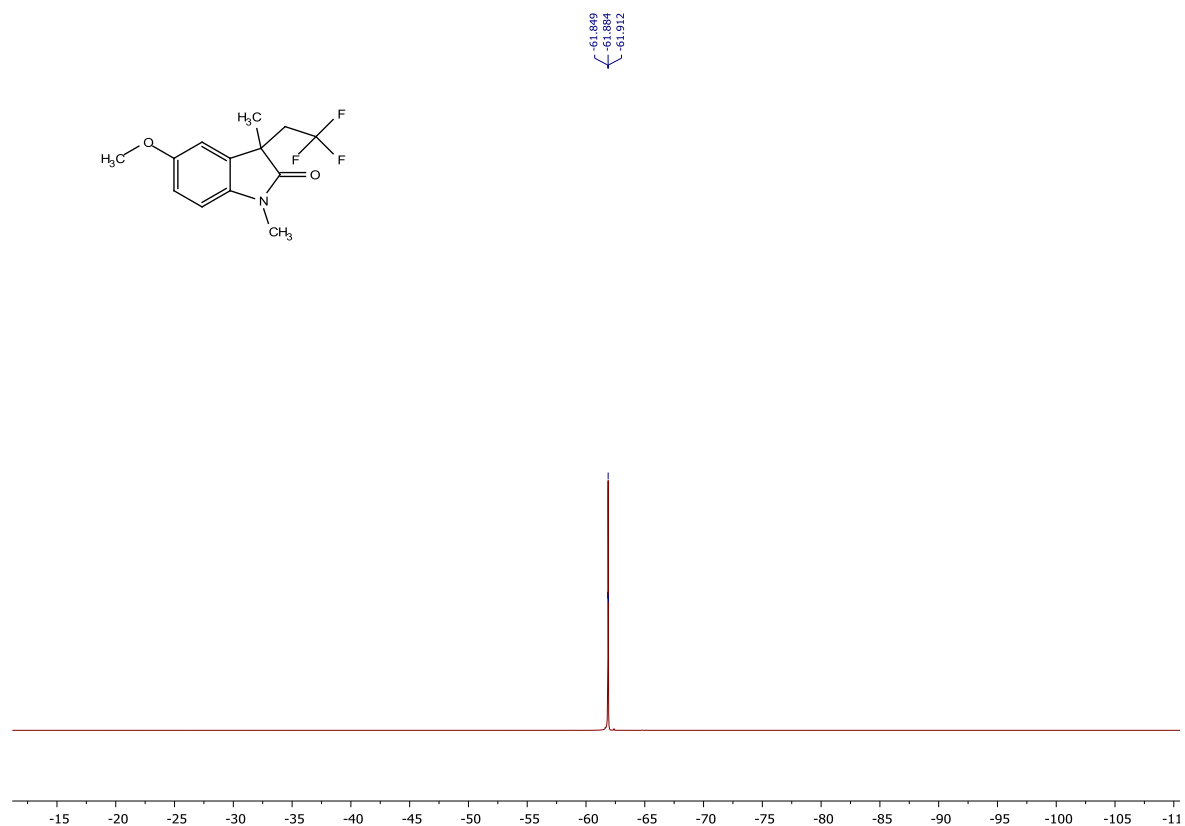

# 5-Fluoro-1,3-dimethyl-3-(2,2,2-trifluoroethyl)indolin-2-one (31)

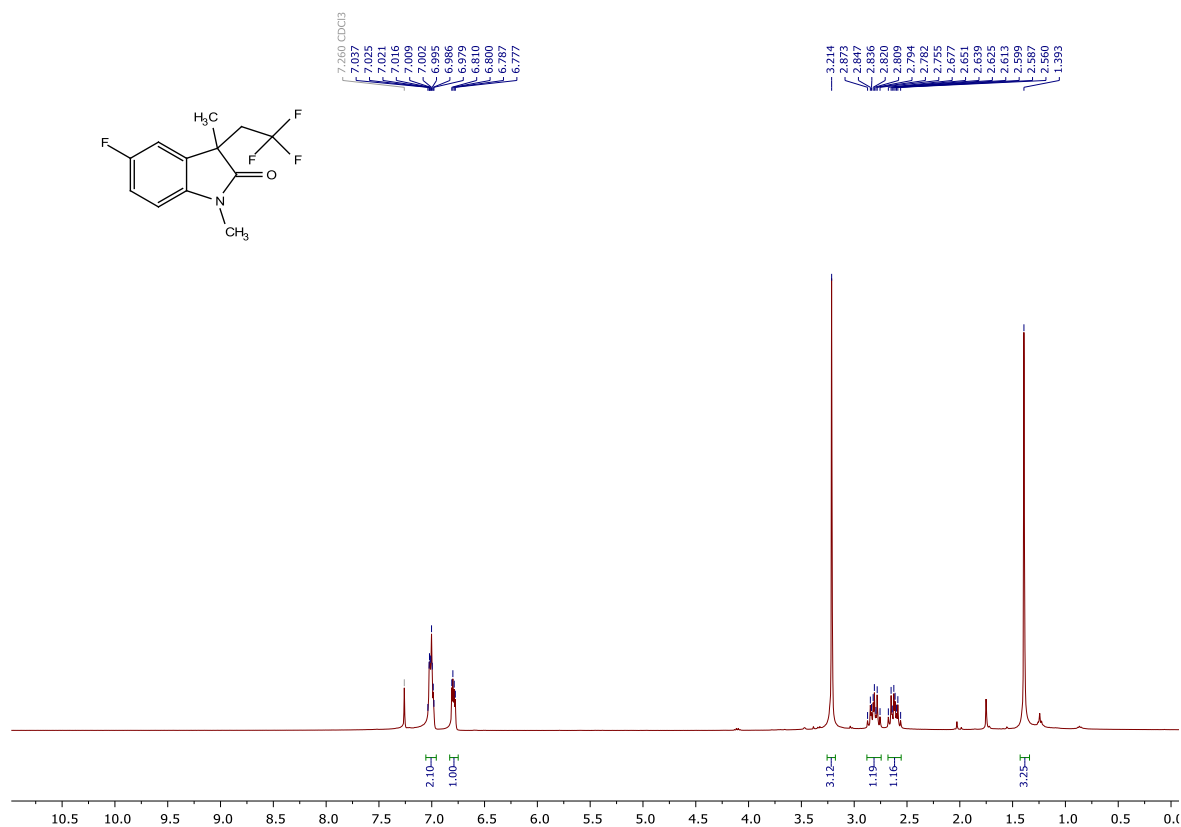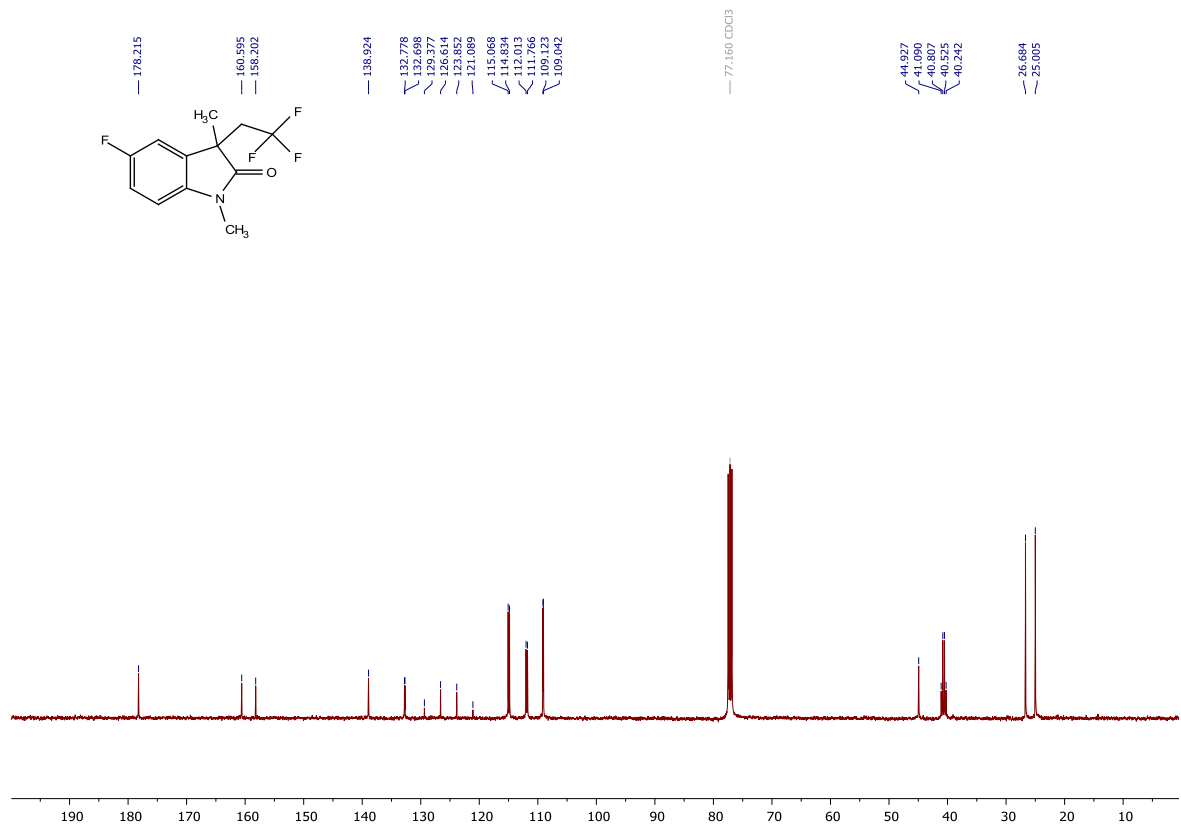

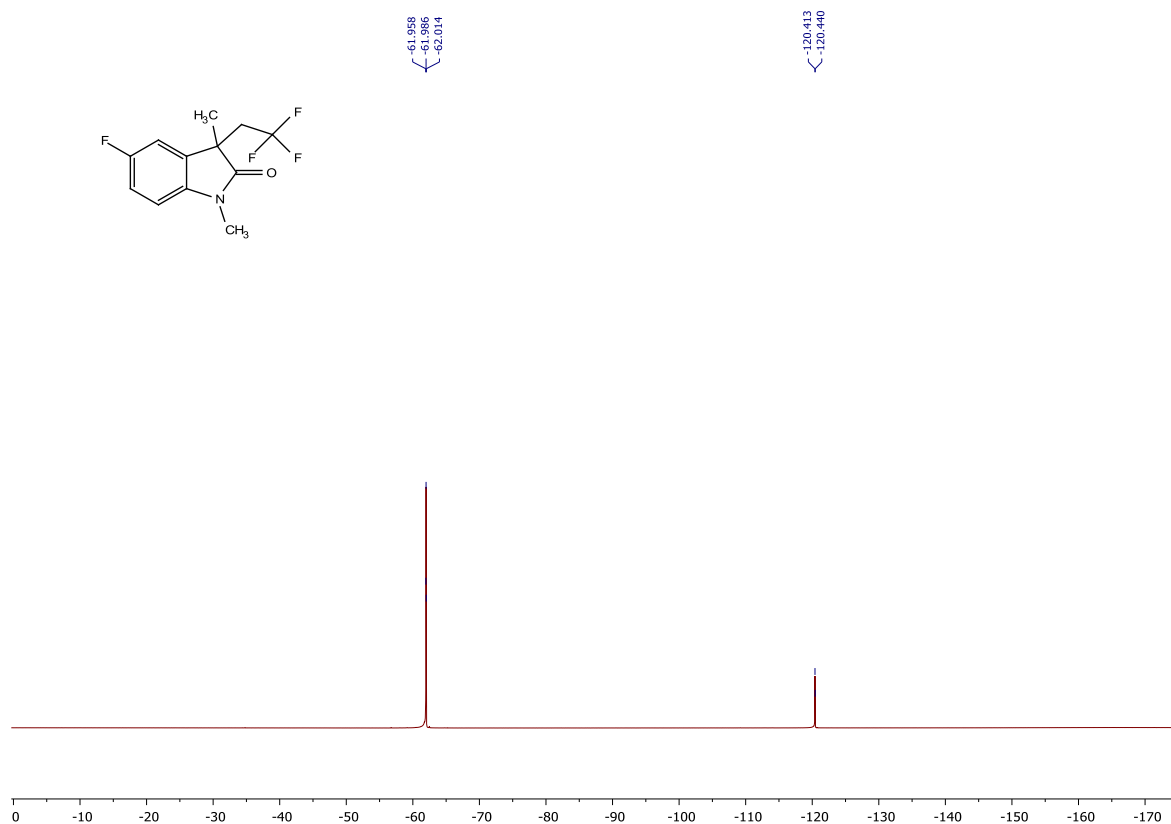

### 5-Chloro-1,3-dimethyl-3-(2,2,2-trifluoroethyl)indolin-2-one (32)

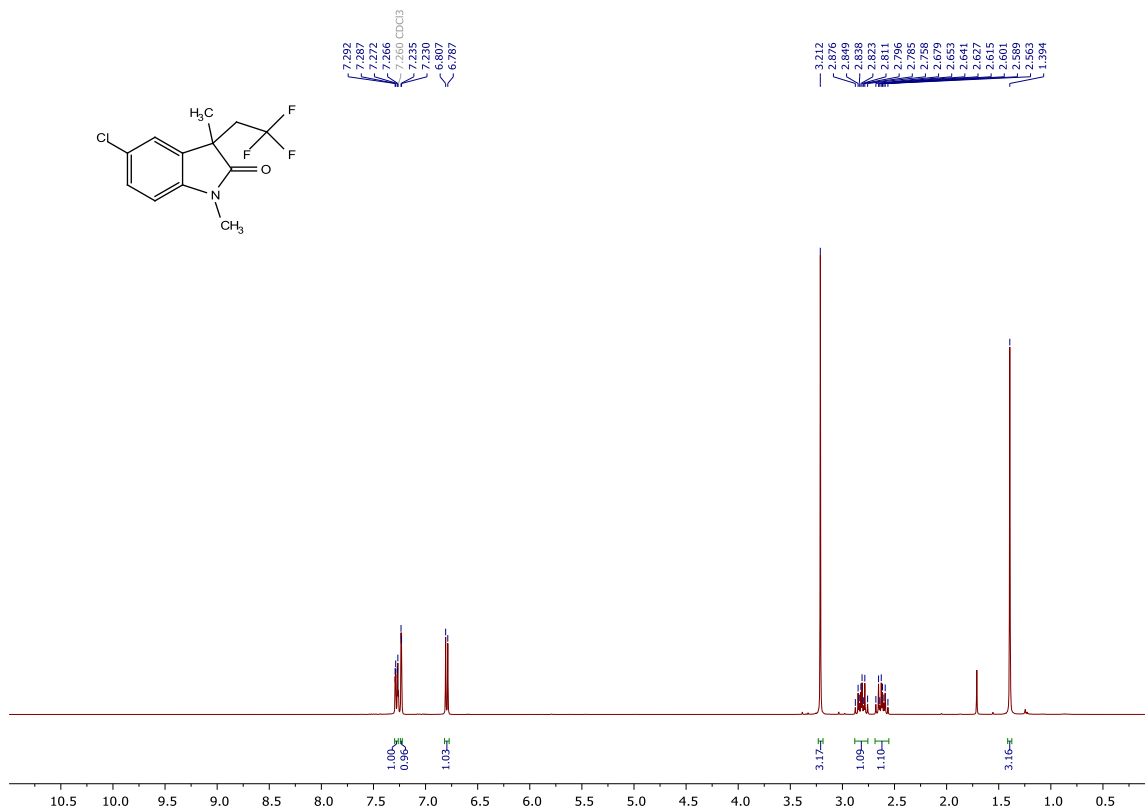

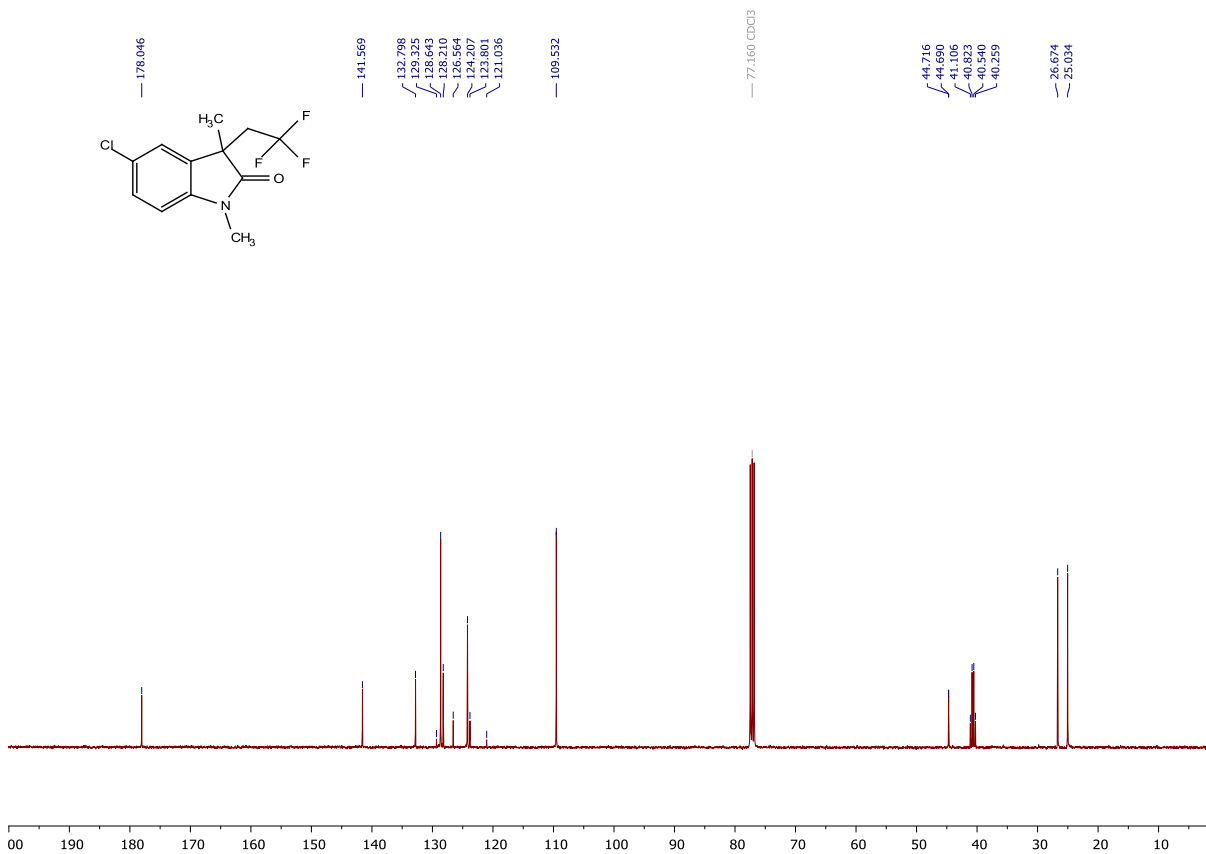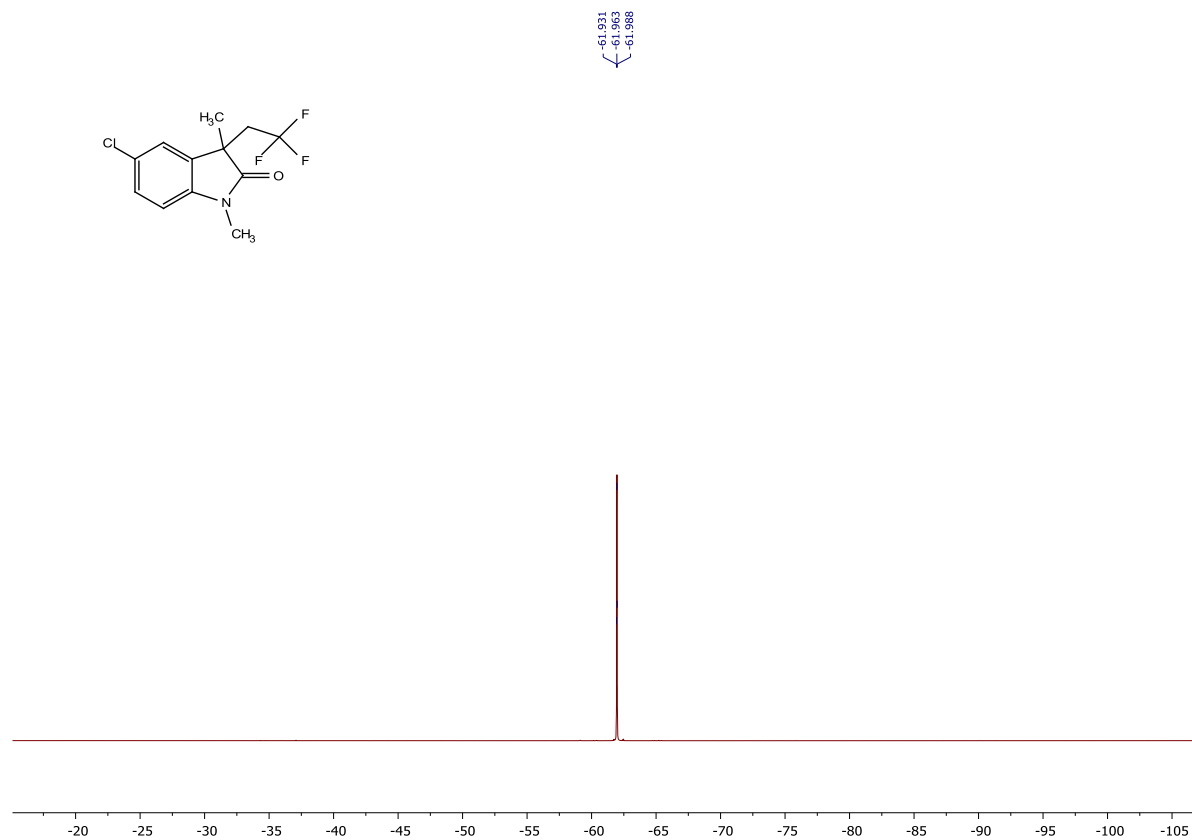

# 5-Bromo-1,3-dimethyl-3-(2,2,2-trifluoroethyl)indolin-2-one (33)

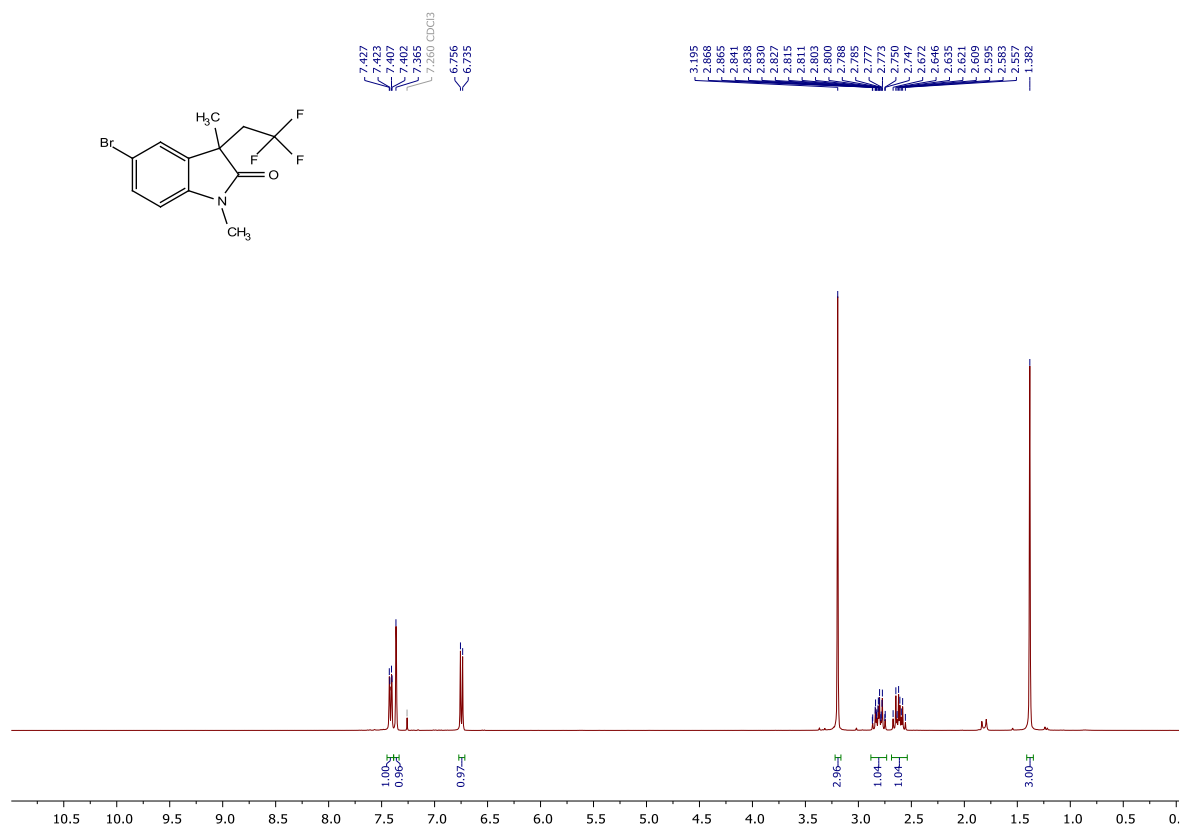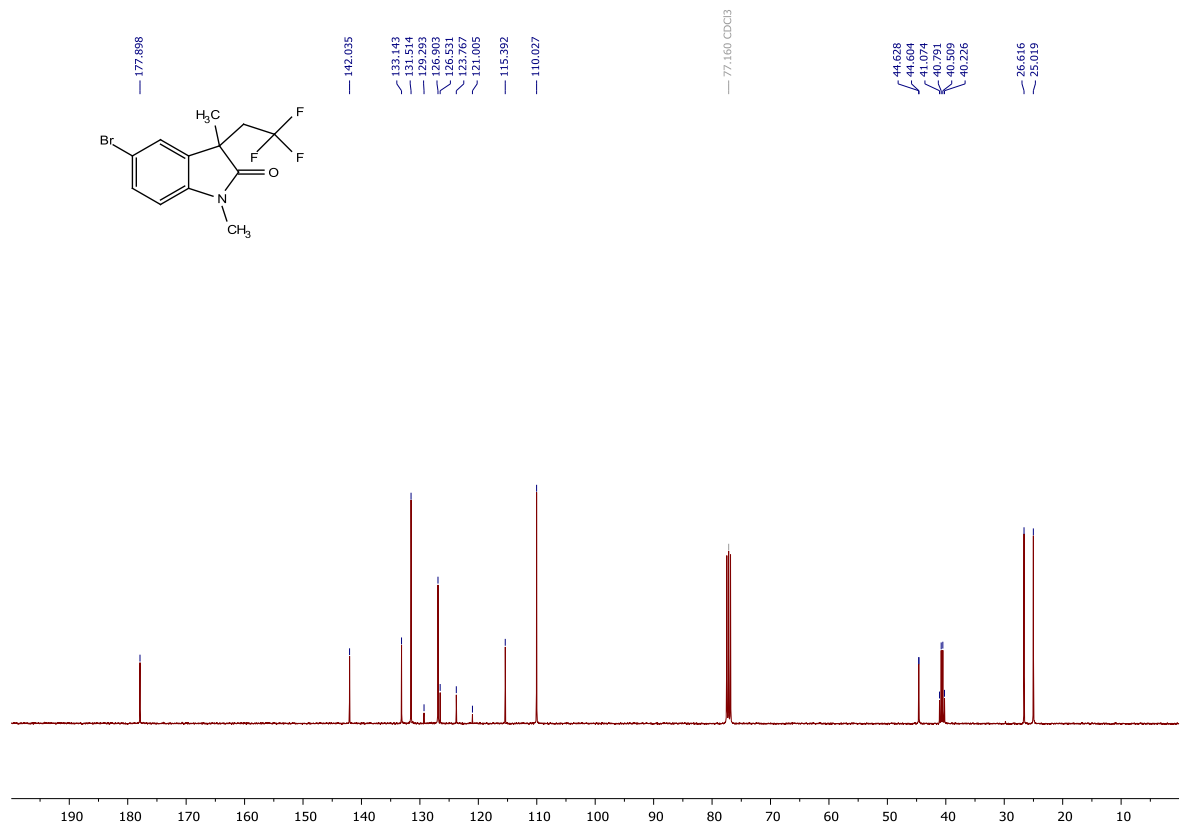

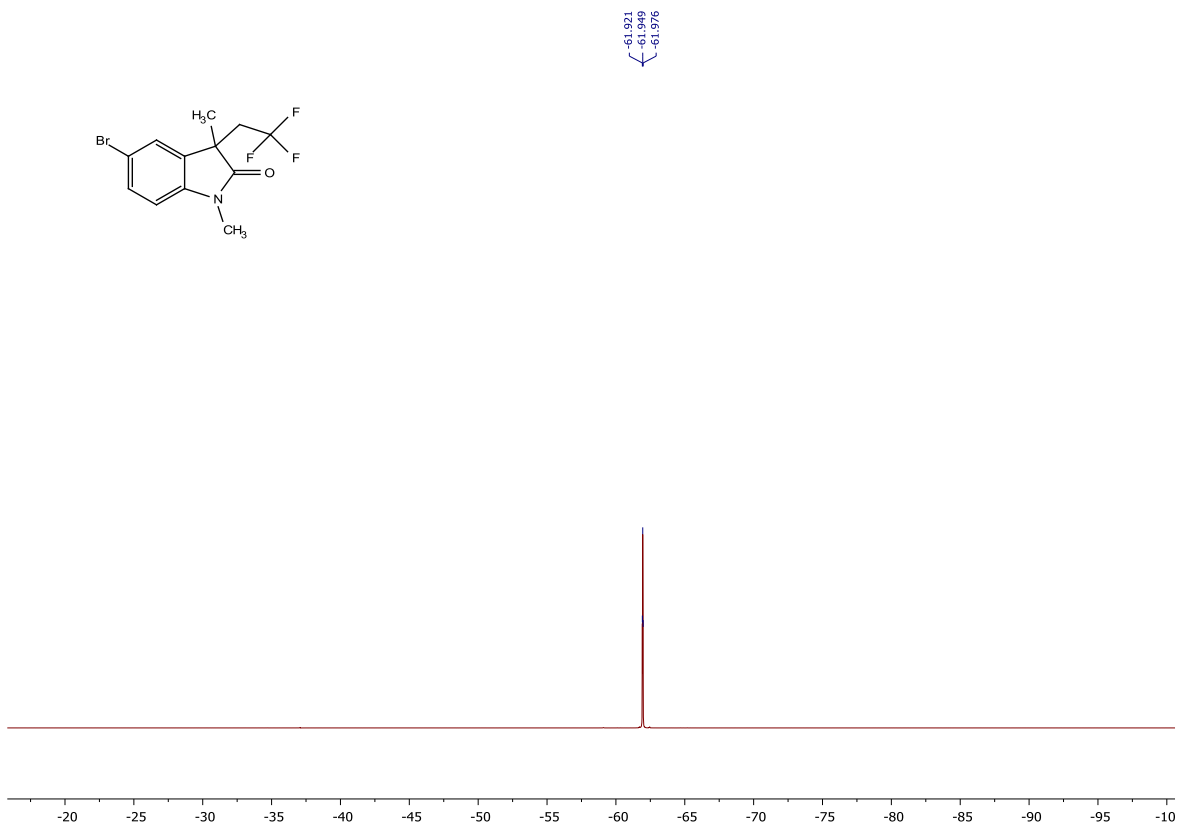

### 1-Ethyl-3-methyl-3-(2,2,2-trifluoroethyl)indolin-2-one (34)

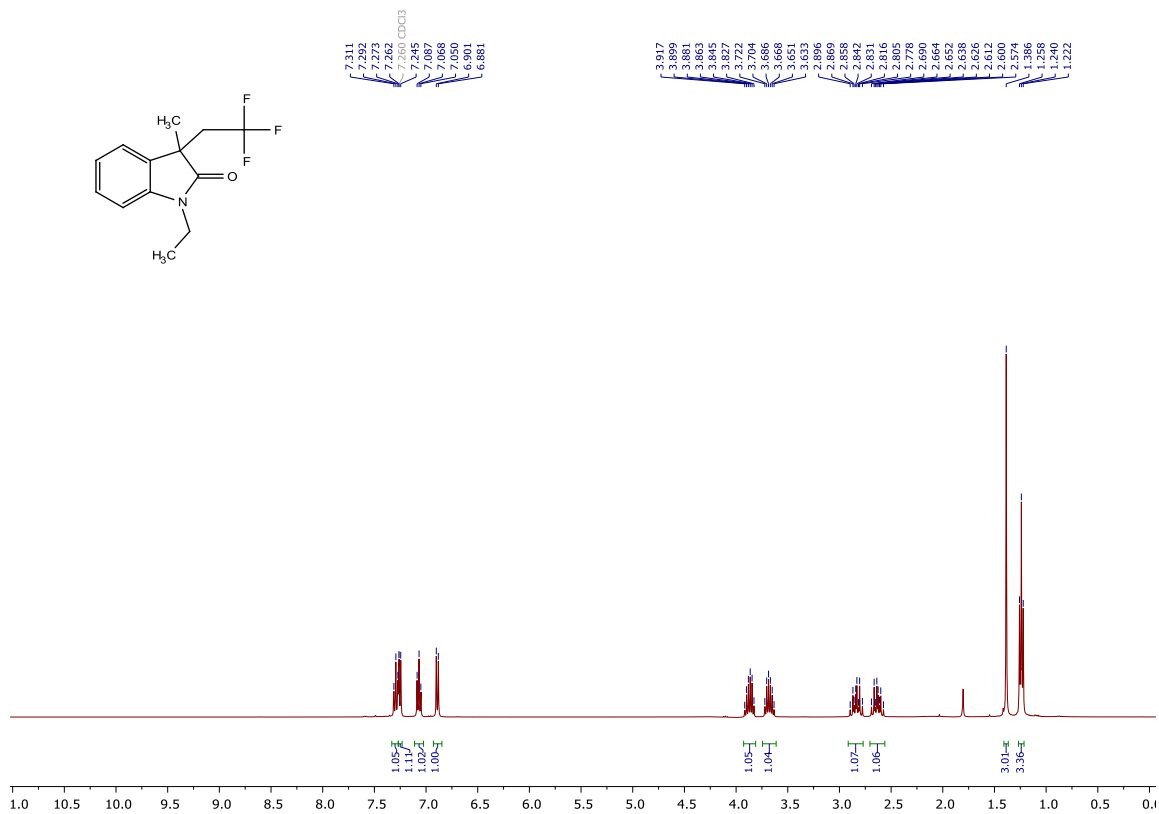

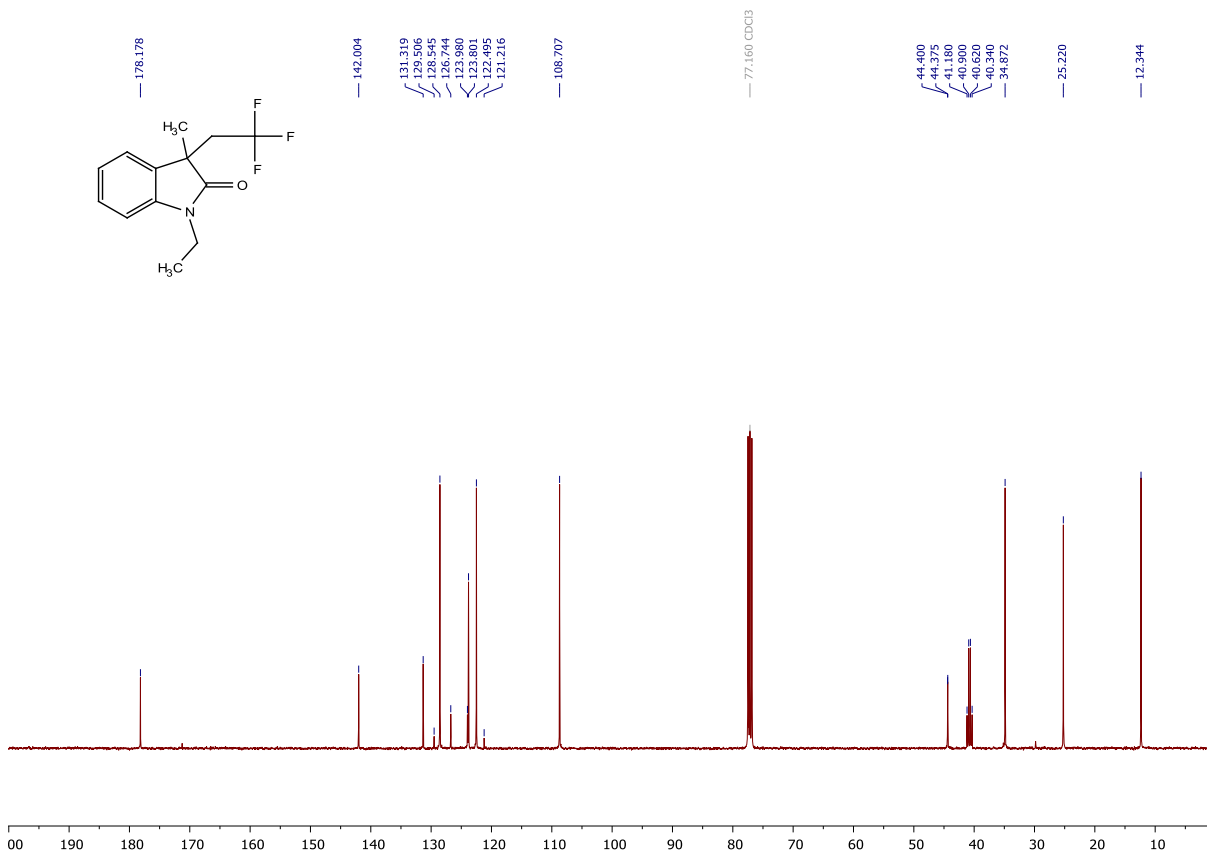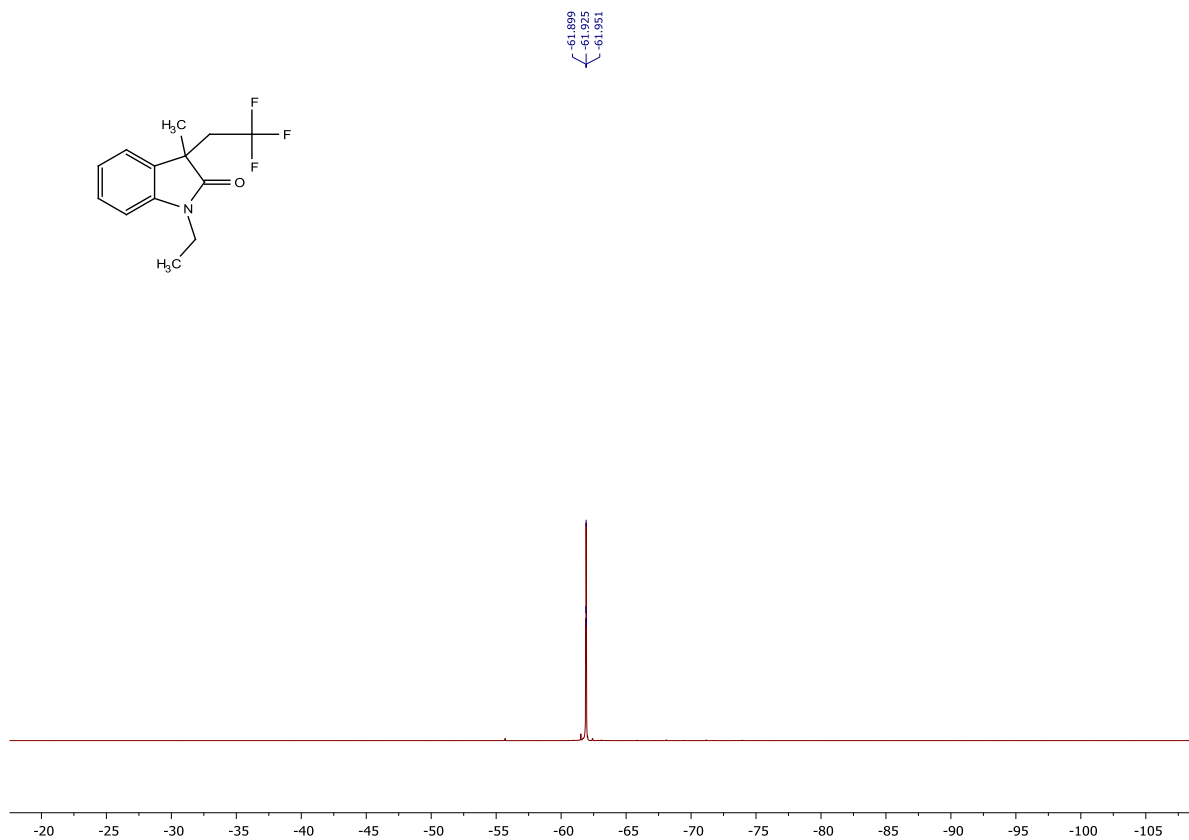



### 3-Methyl-1-phenyl-3-(2,2,2-trifluoroethyl)indolin-2-one (35)

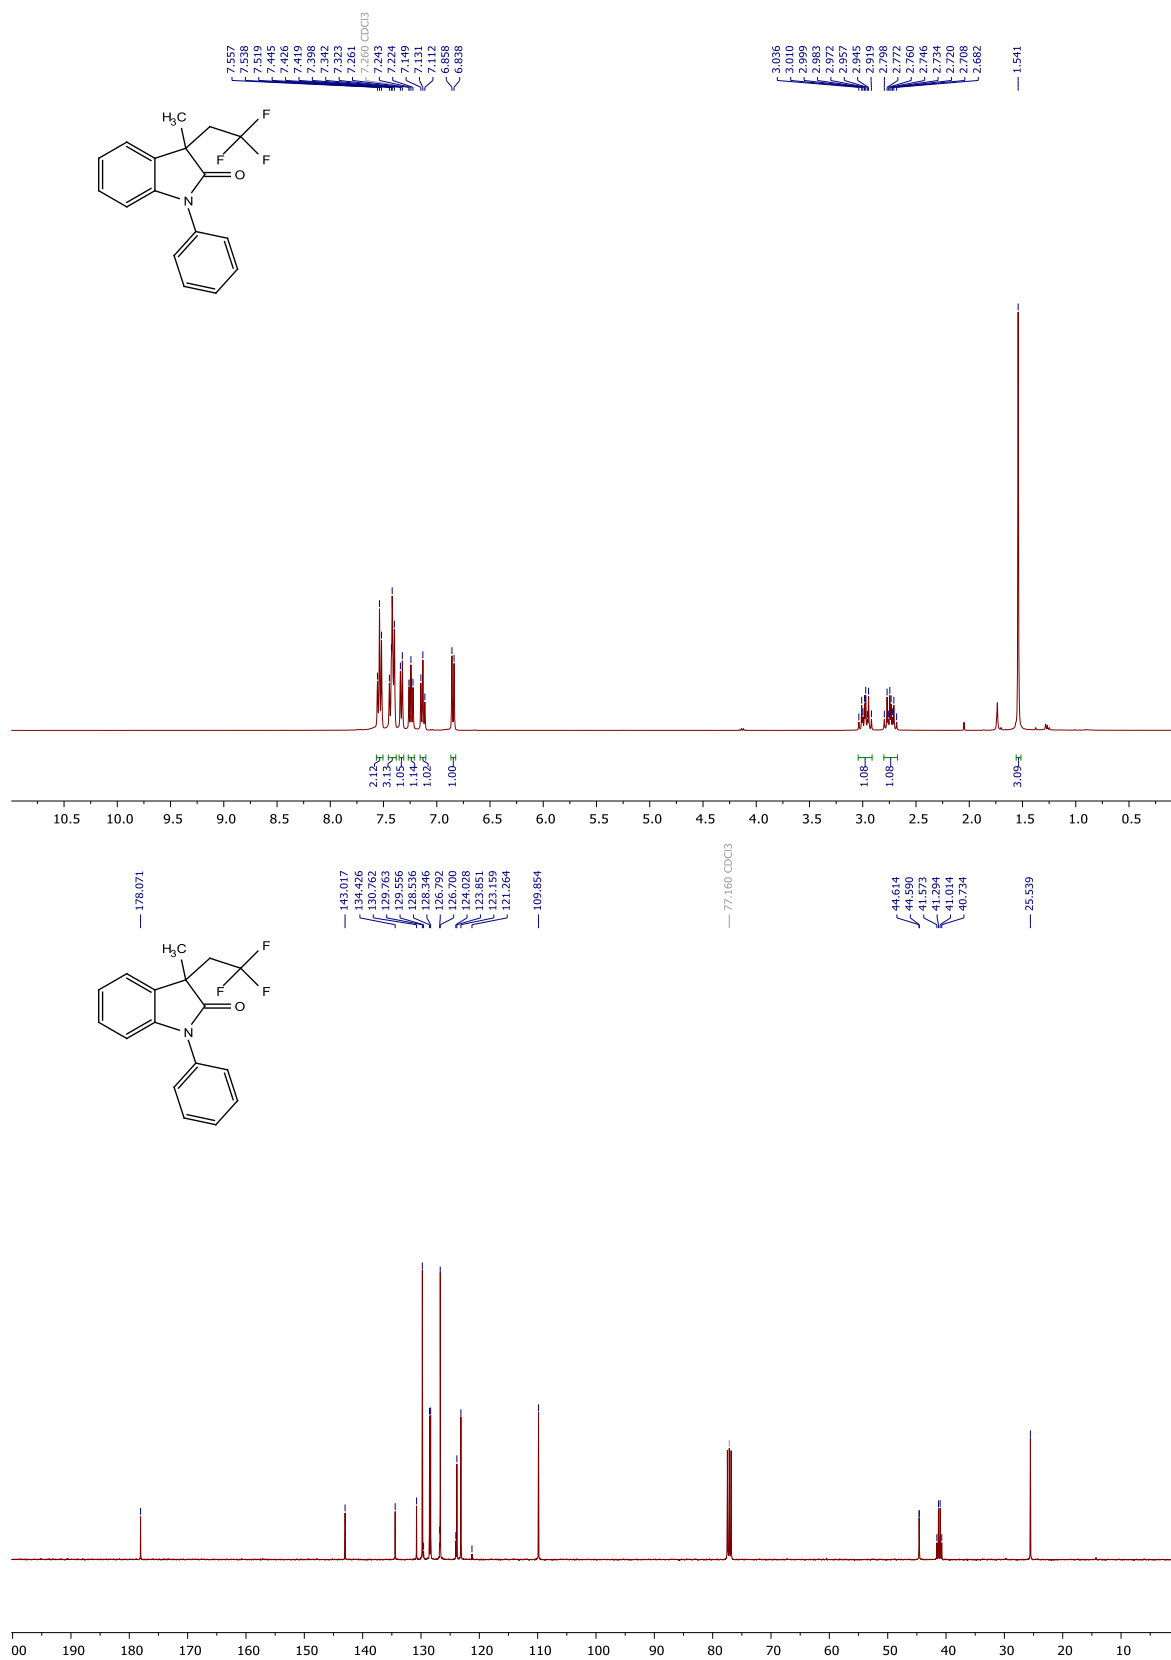

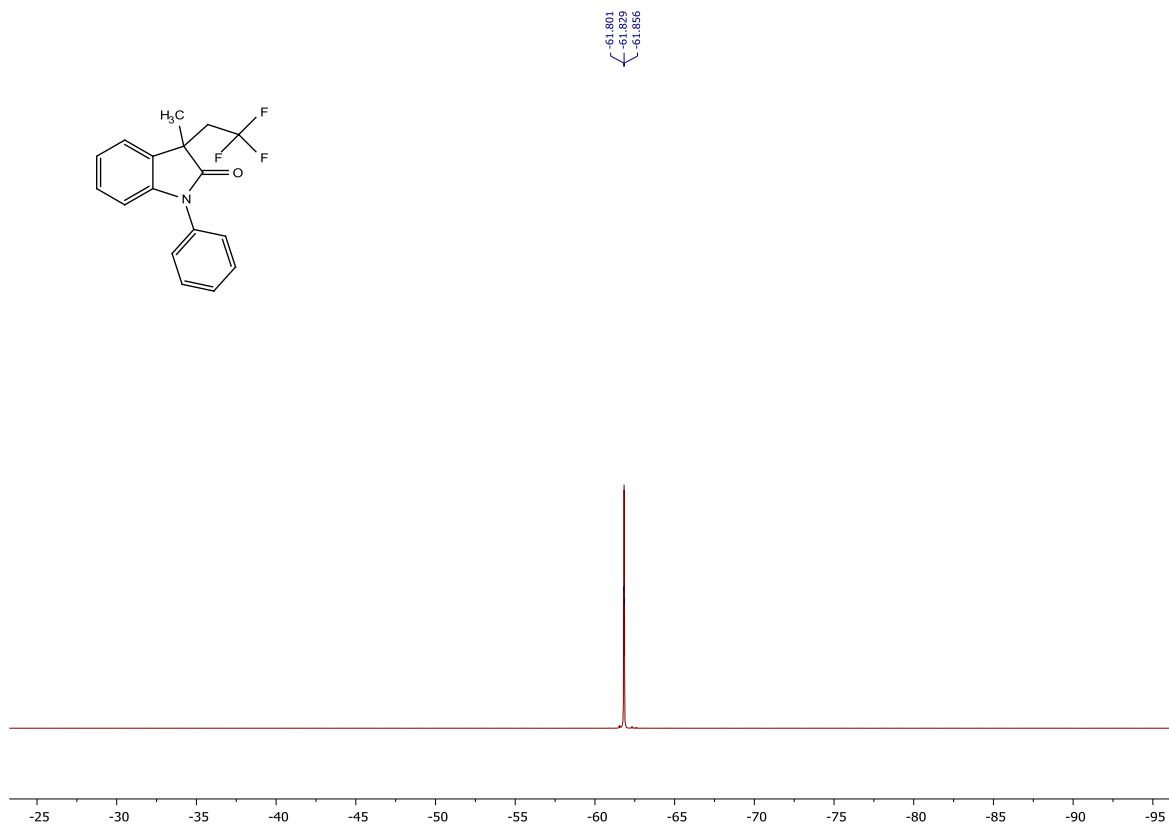

**1-Methyl-1-(2,2,2-trifluoroethyl)-5,6-dihydro-4H-pyrrolo[3,2,1-*ij*]quinolin-2(1H)-one (36)**

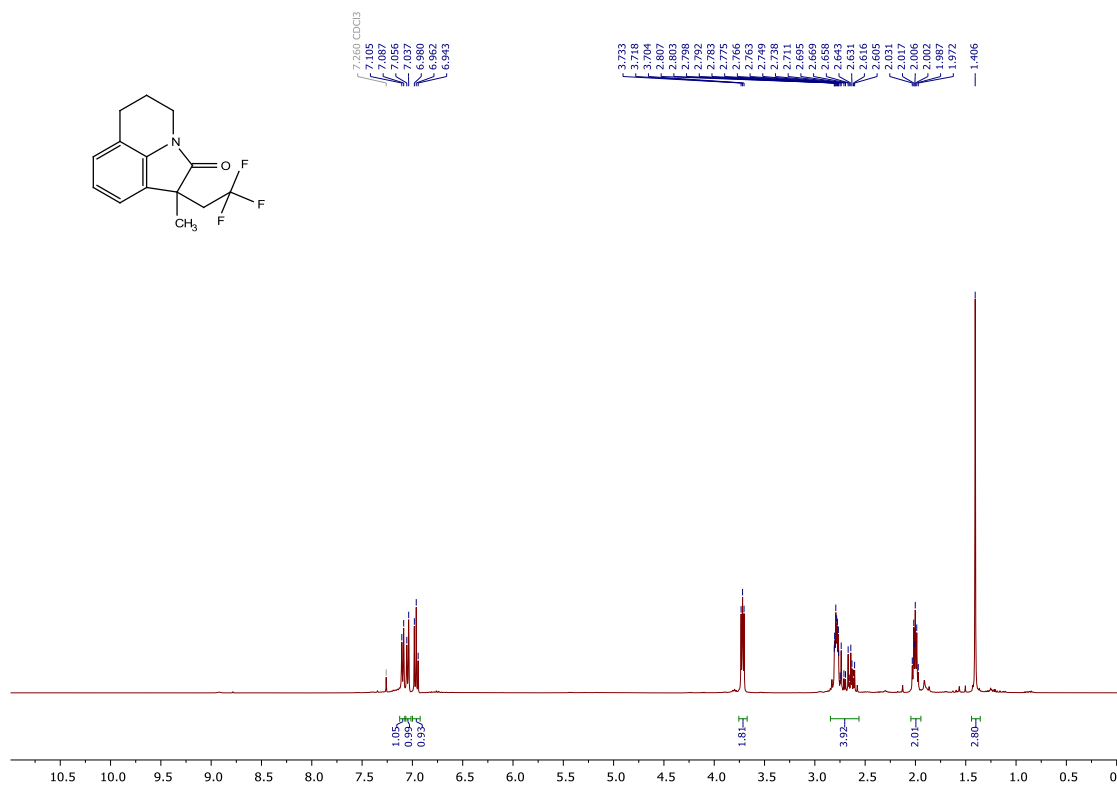

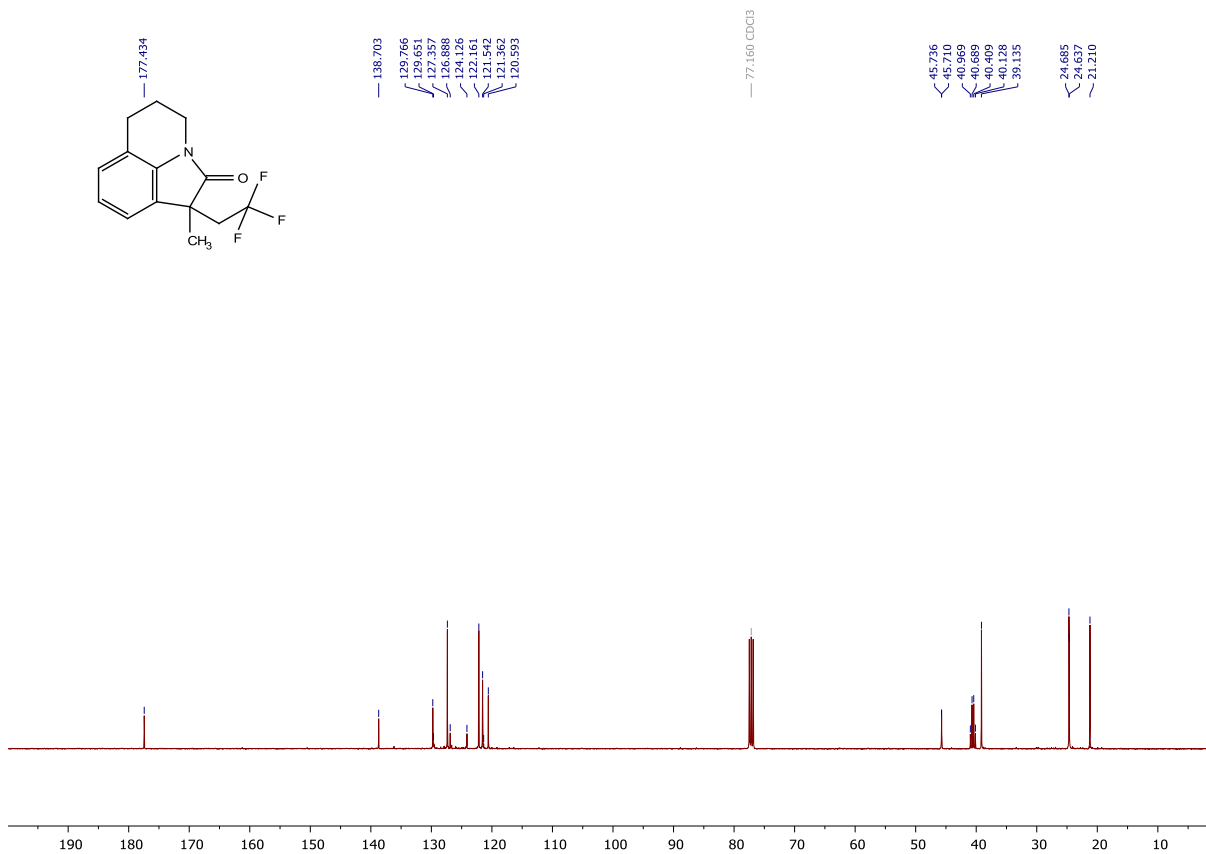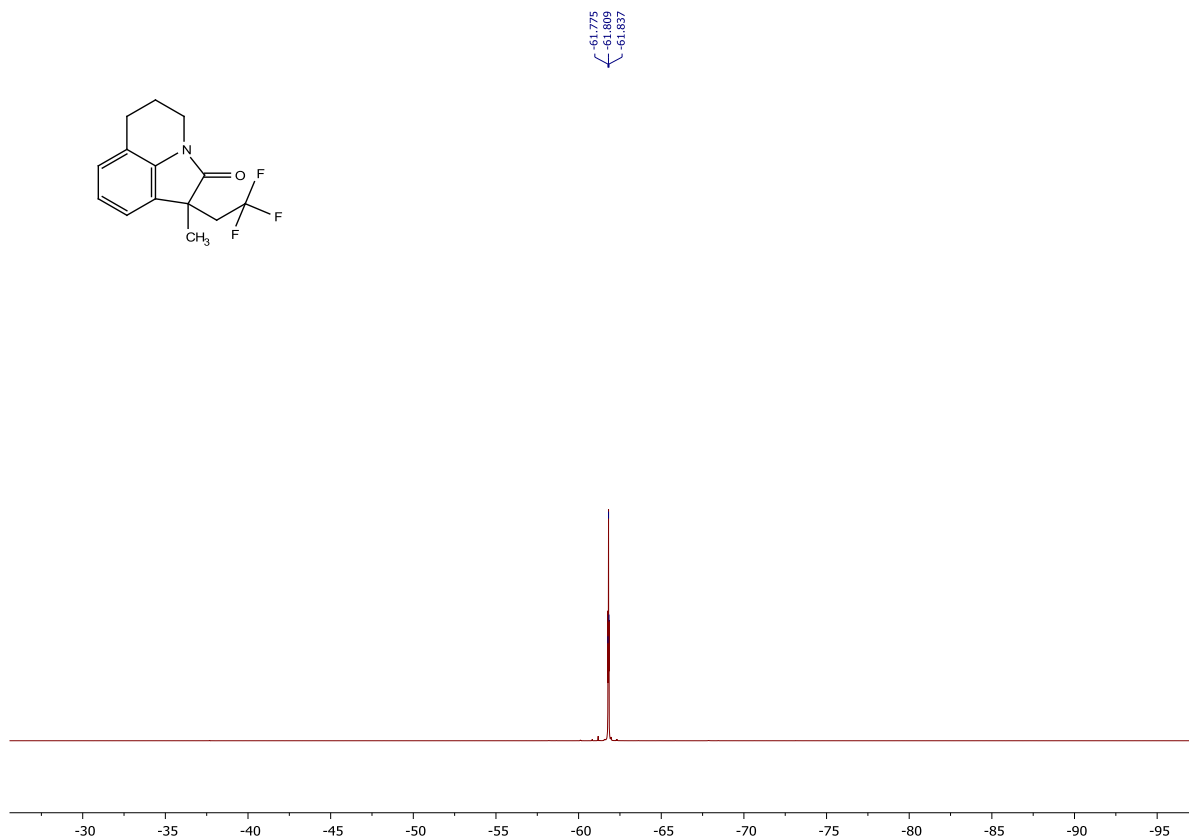

**(E)-1-Methoxy-4-(3,3,3-trifluoroprop-1-en-1-yl)benzene (37)**

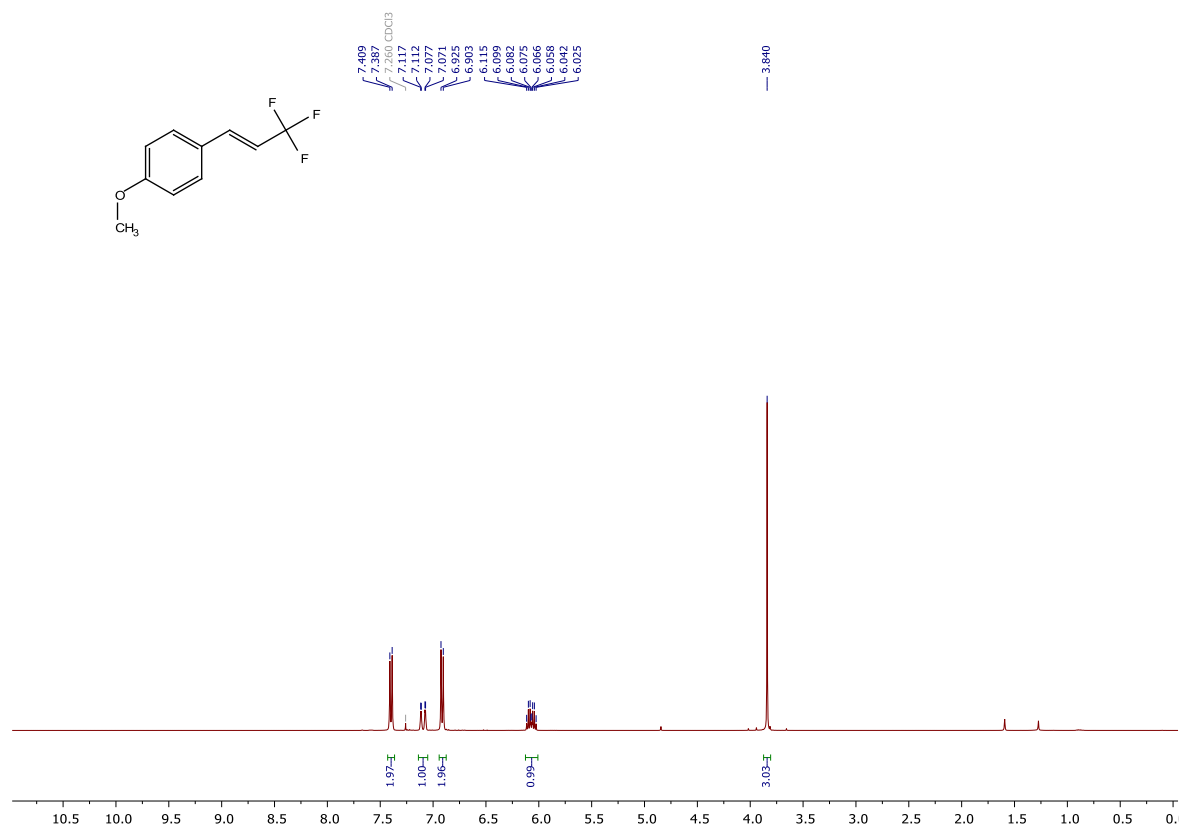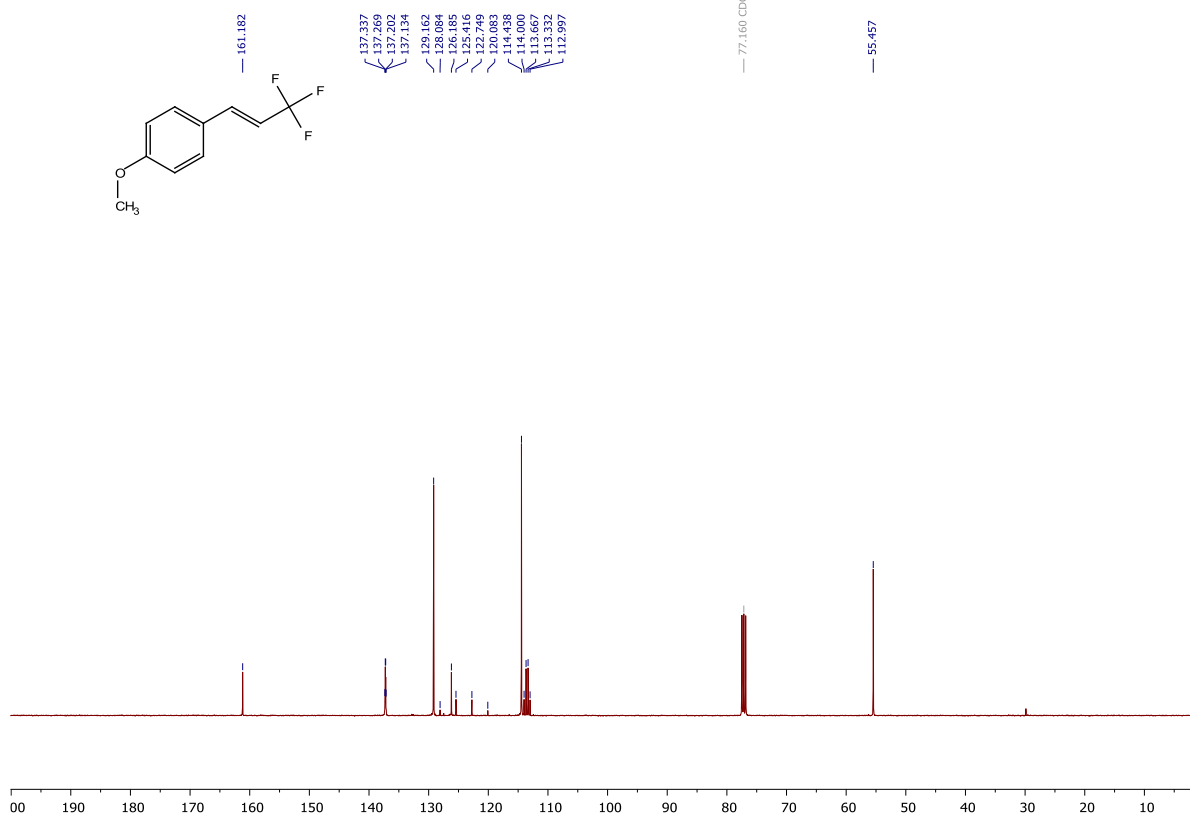

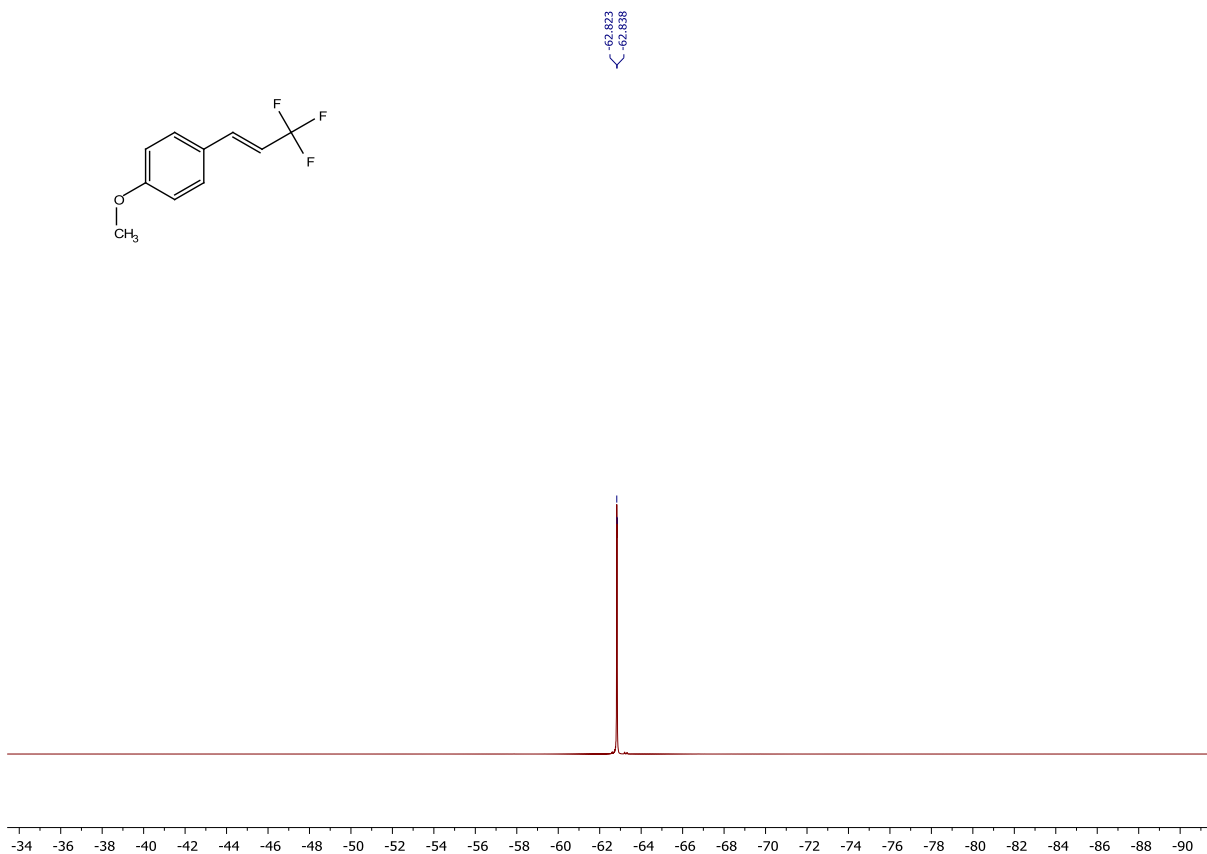

**(*E*)-1-Methyl-4-(3,3,3-trifluoroprop-1-en-1-yl)benzene (38)**

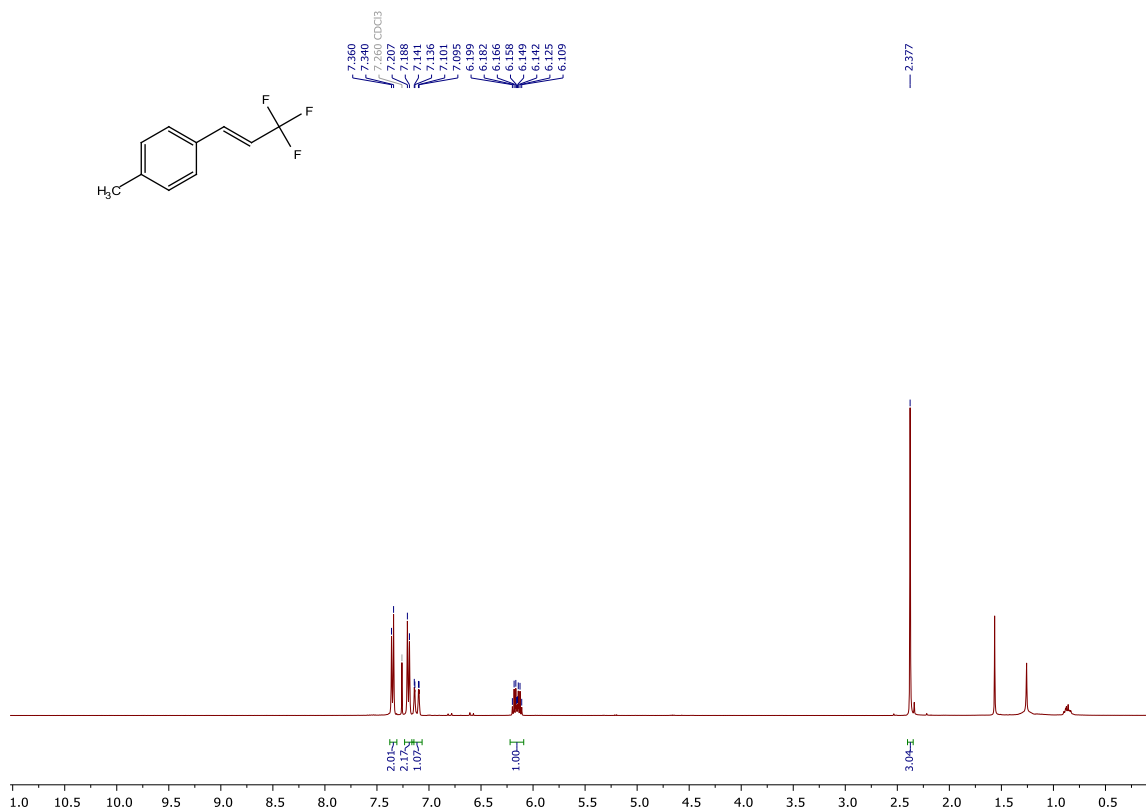

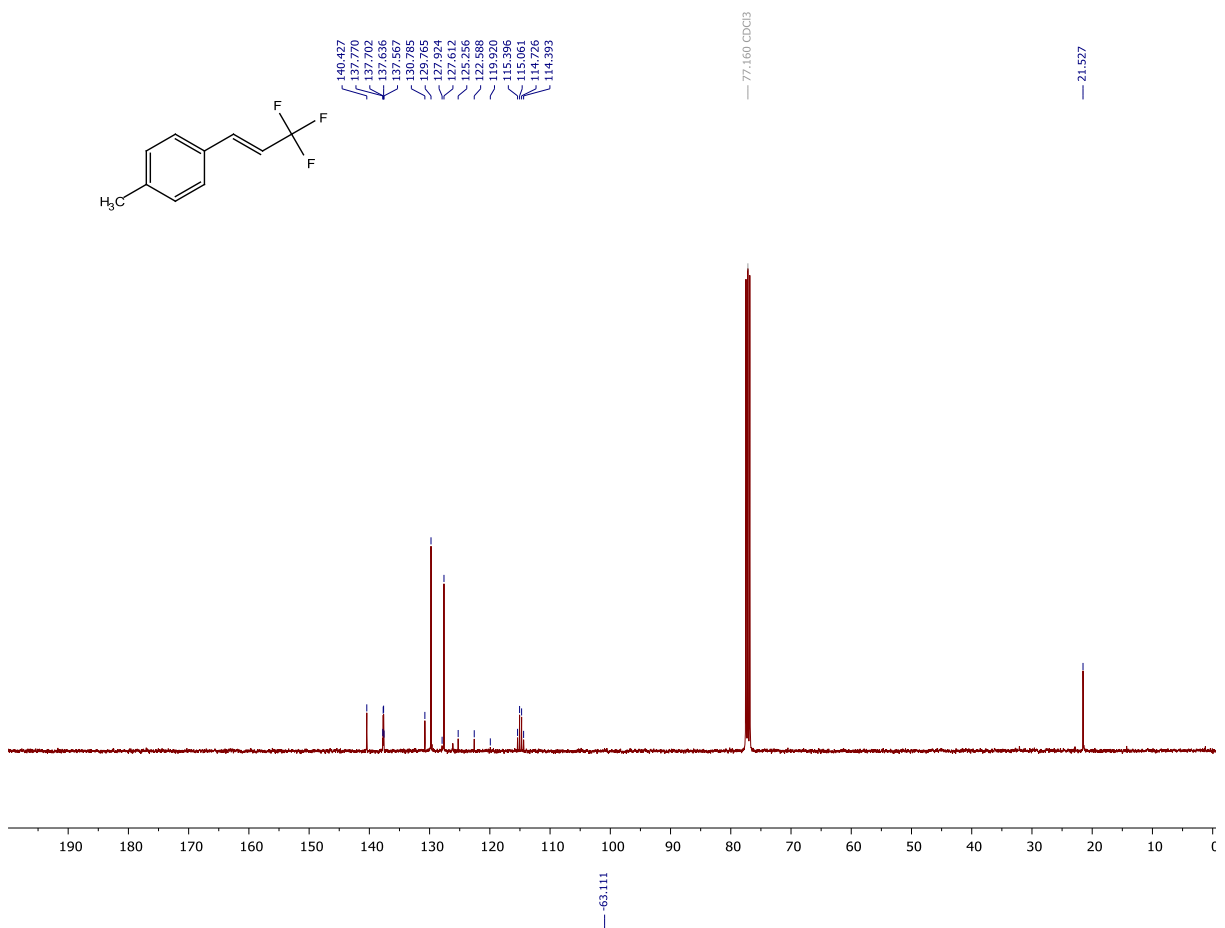

**(E)-1,2-Dimethoxy-4-(3,3,3-trifluoroprop-1-en-1-yl)benzene (39)**

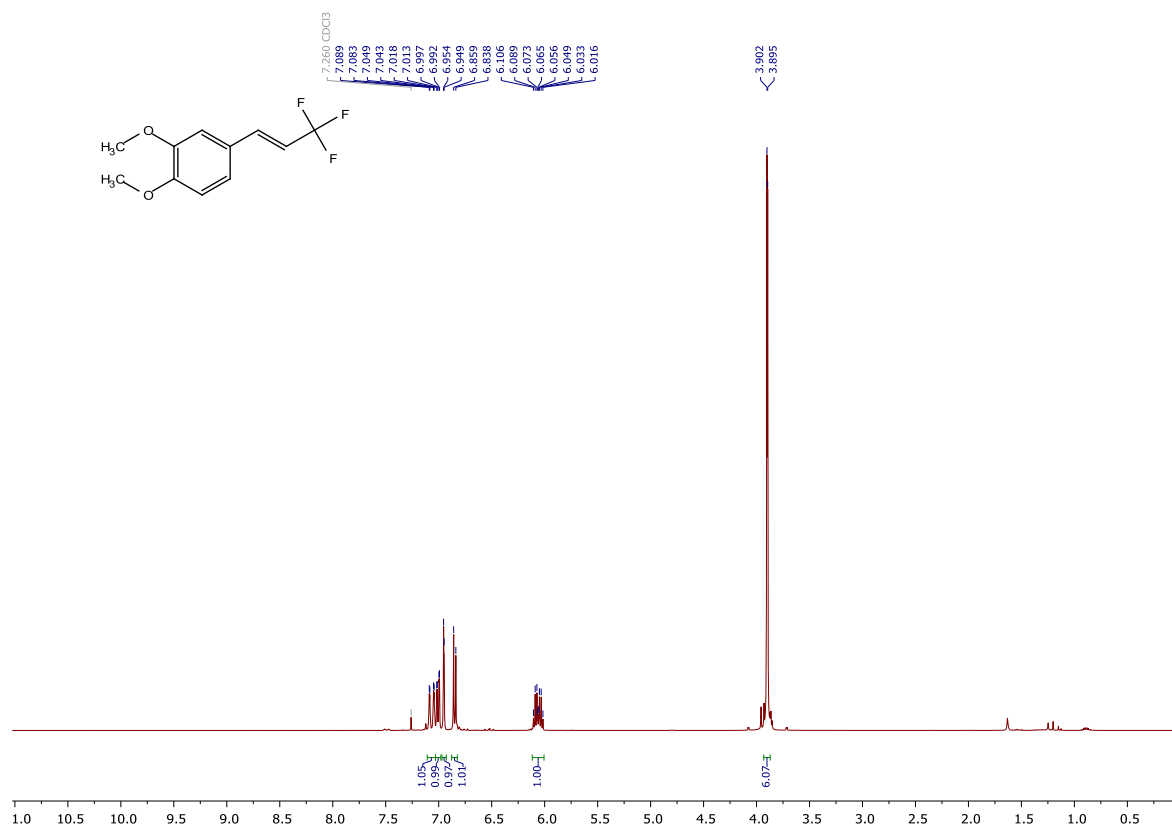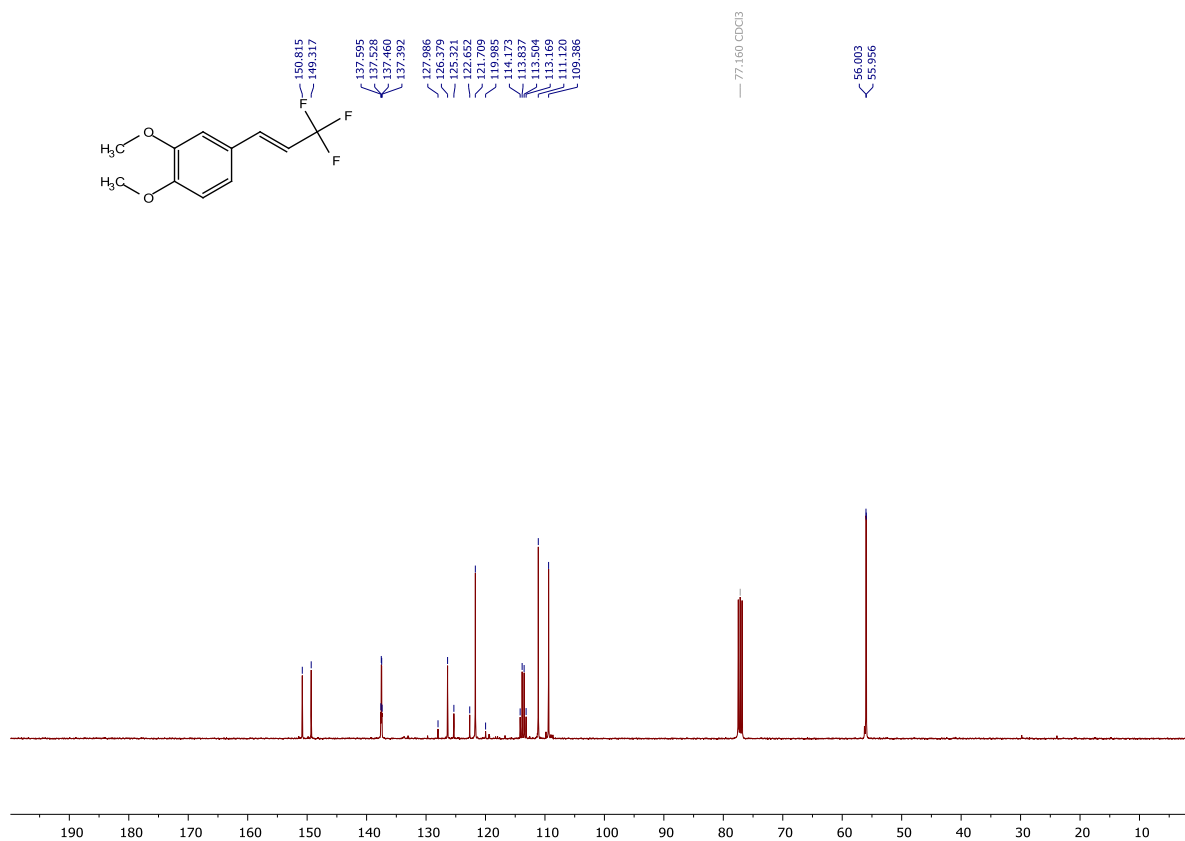

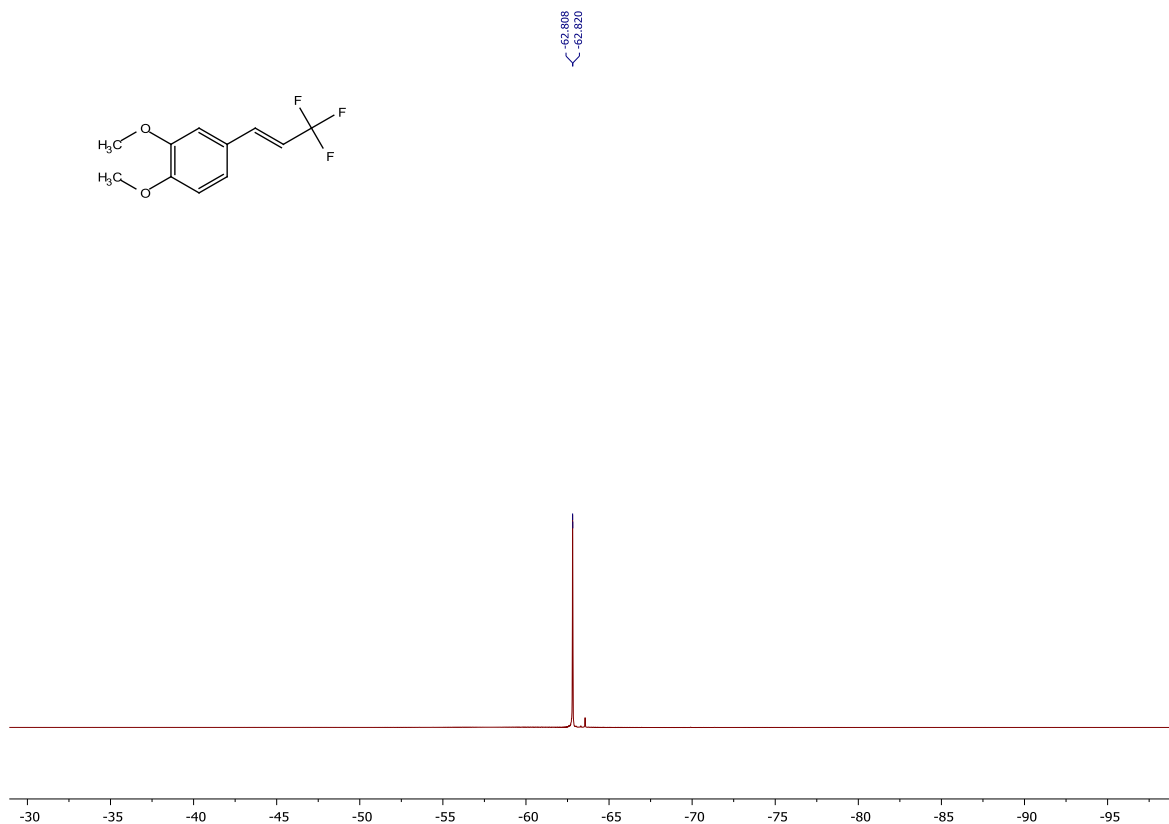

**(E)-5-(3,3,3-Trifluoroprop-1-en-1-yl)benzo[d][1,3]dioxole (40)**

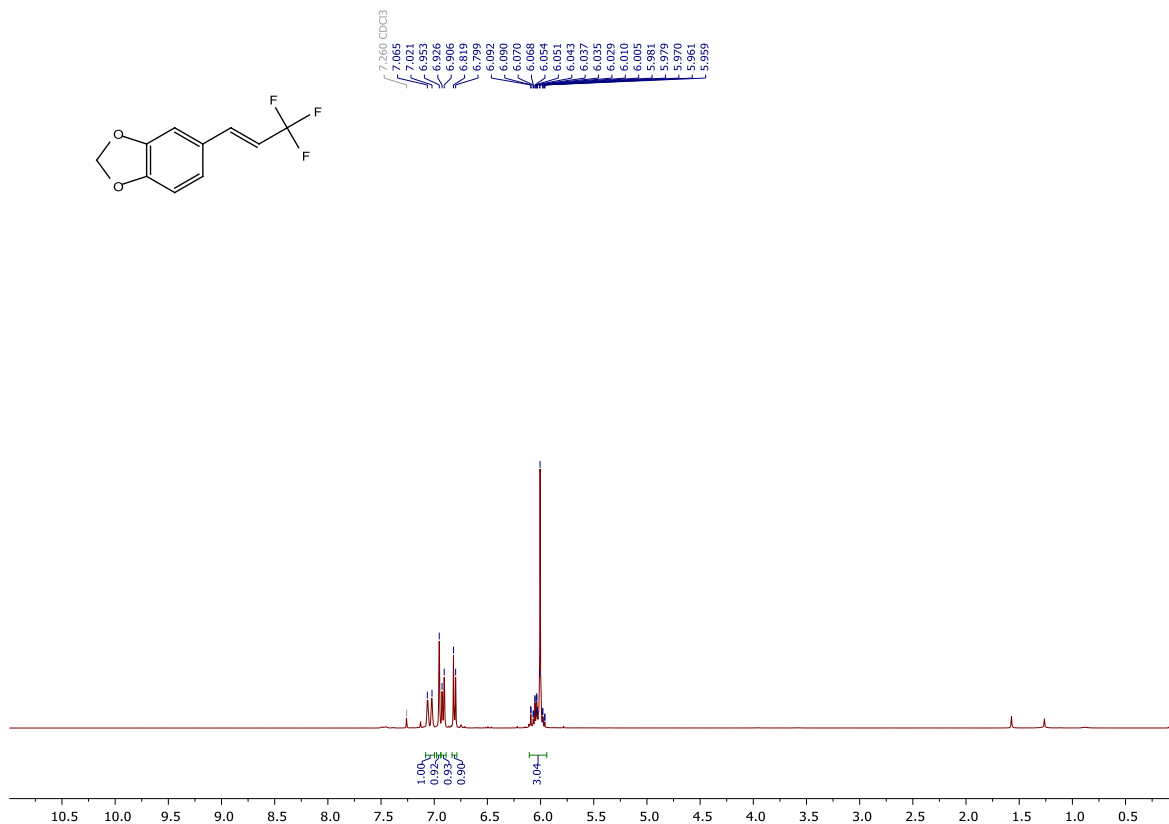



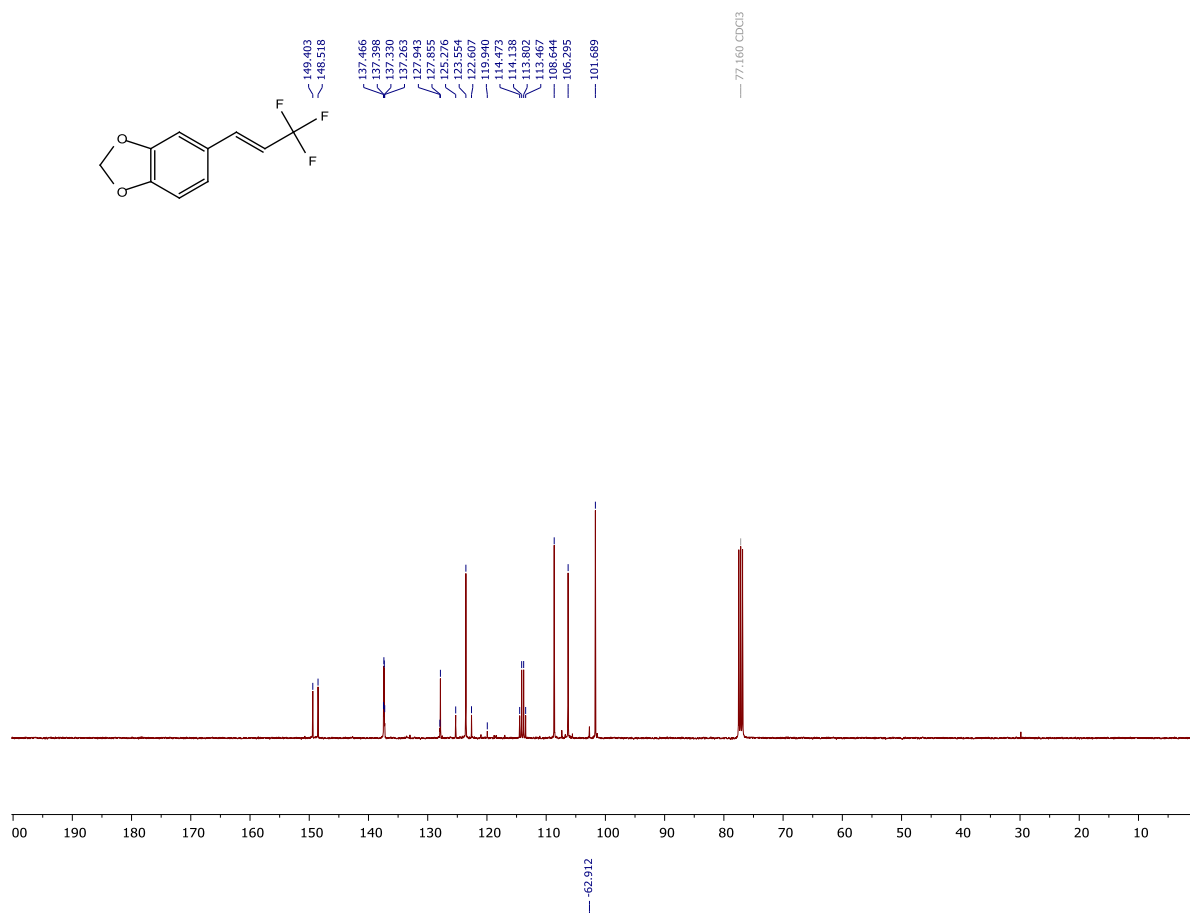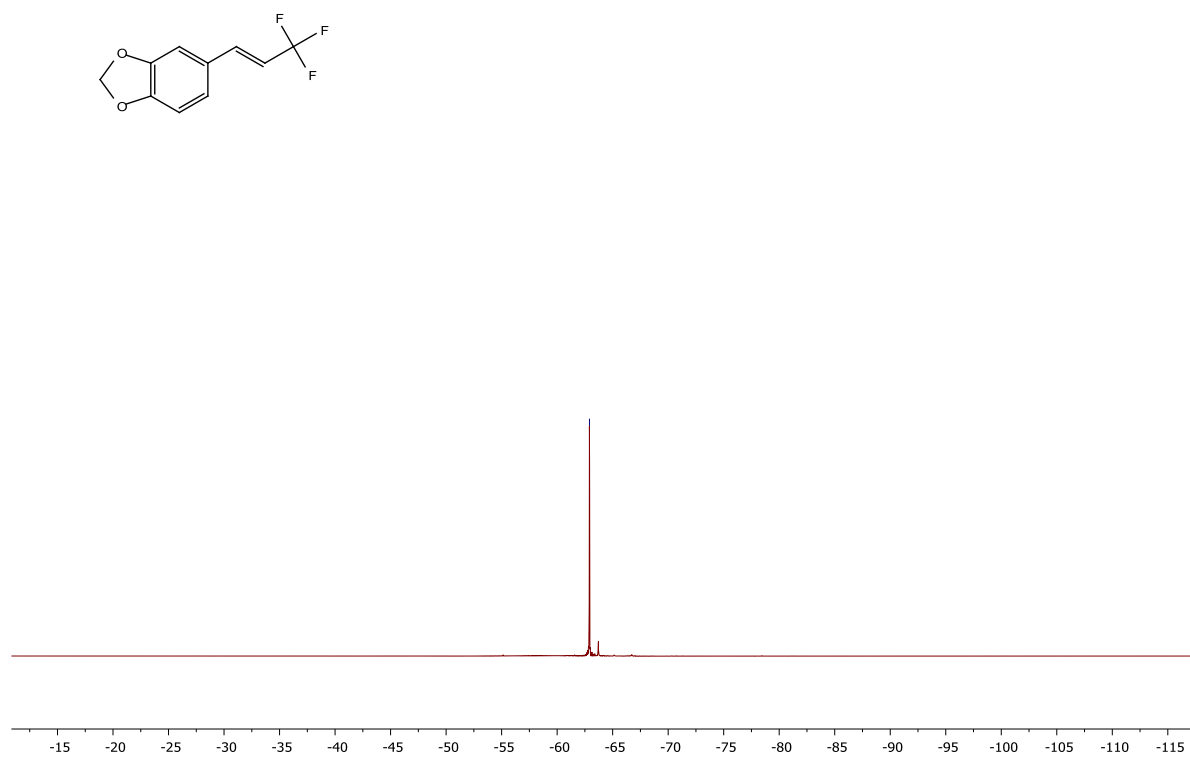

**(E)-3-(3,3,3-Trifluoroprop-1-en-1-yl)phenol (41)**

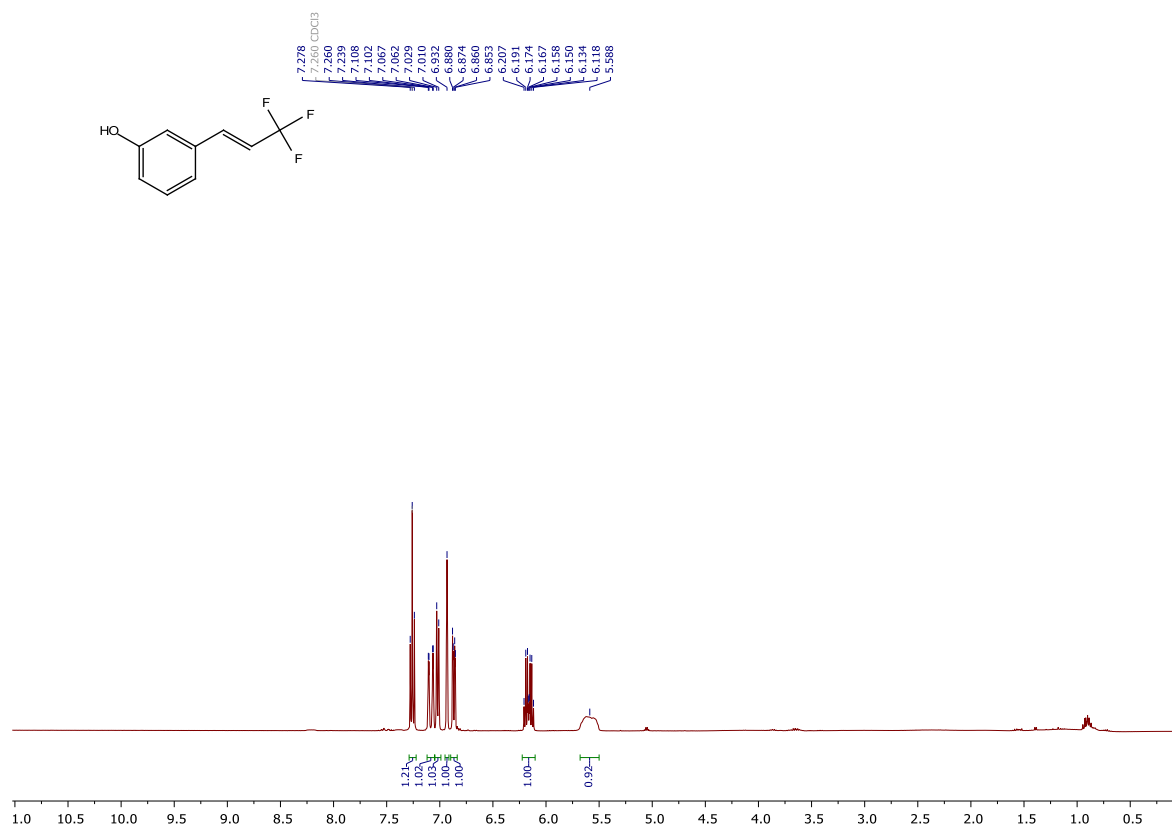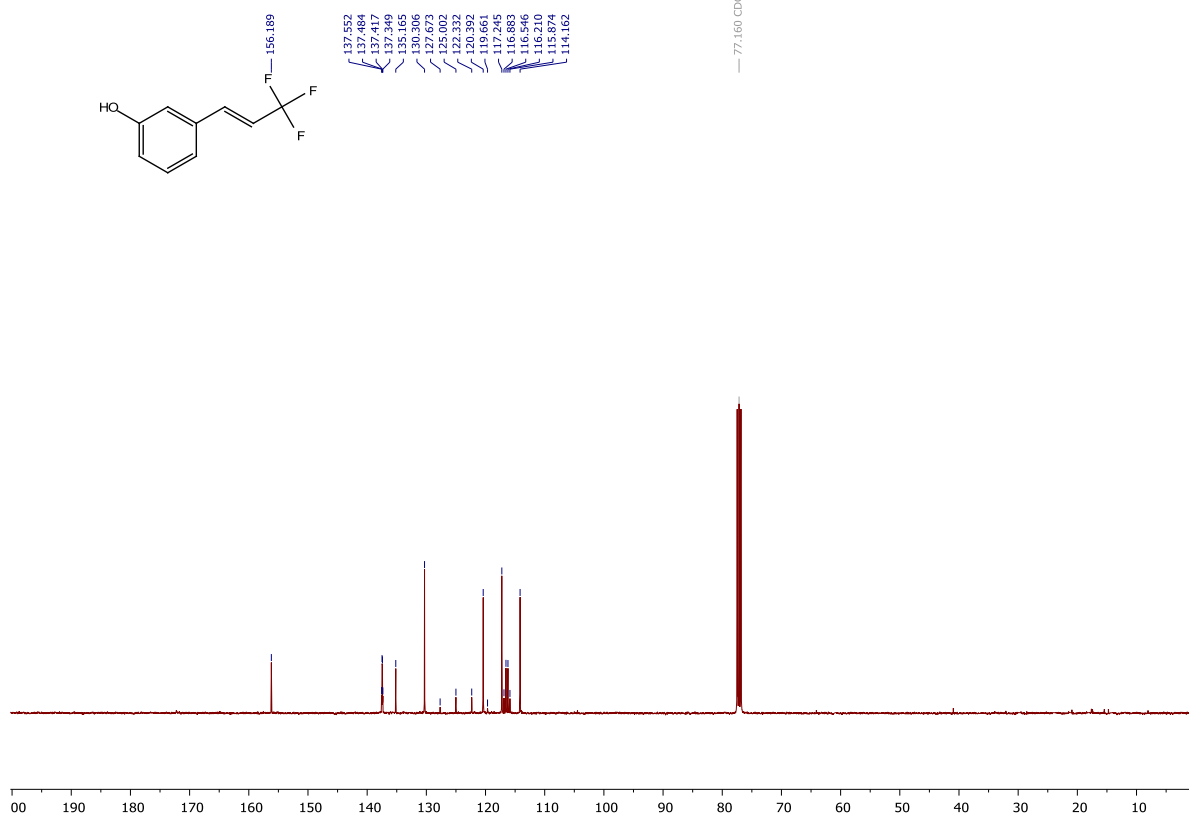

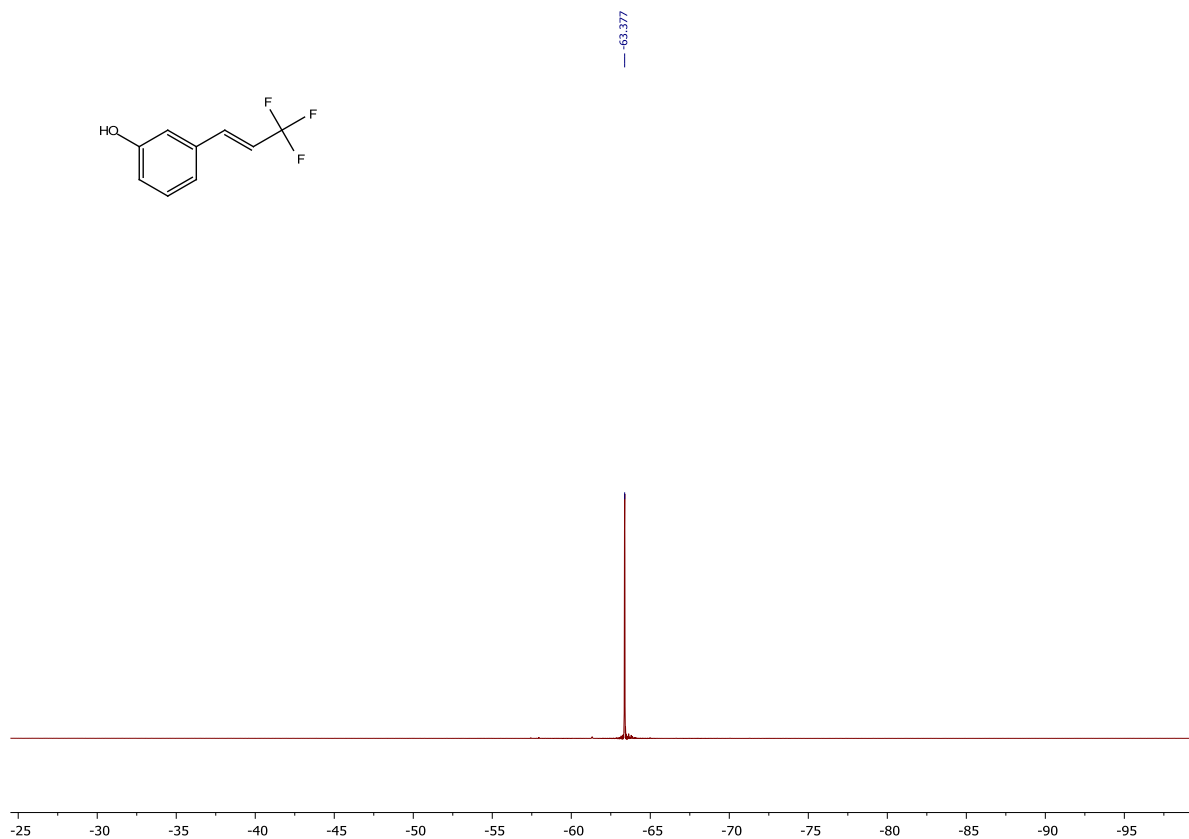

**(E)-2-Methoxy-4-(3,3,3-trifluoroprop-1-en-1-yl)phenol (42)**

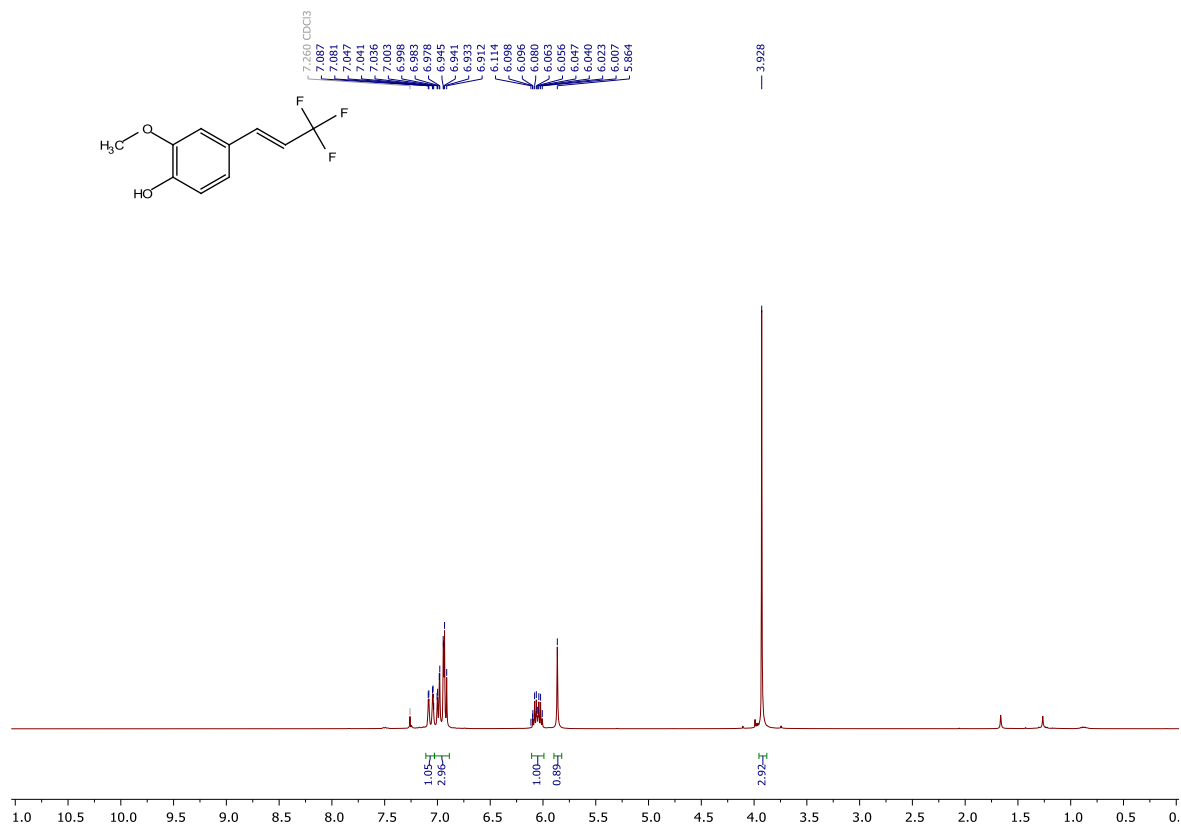

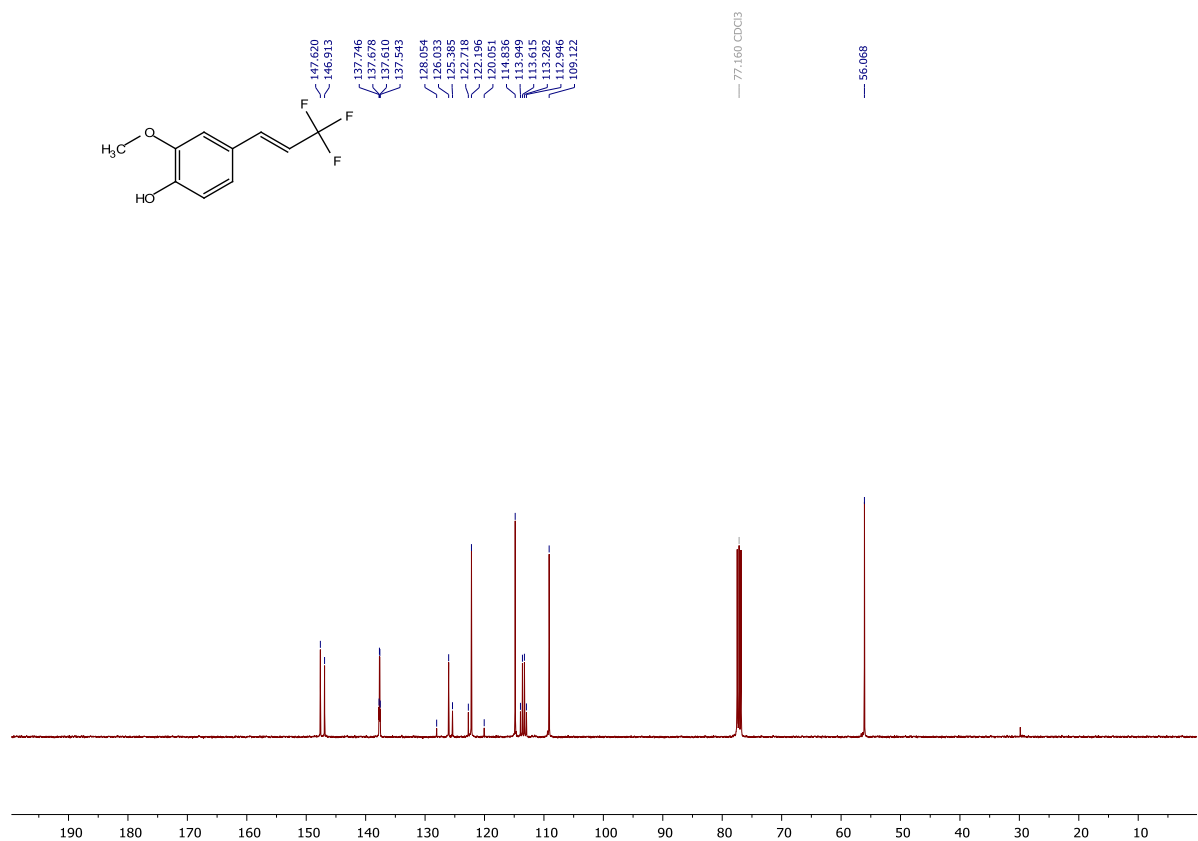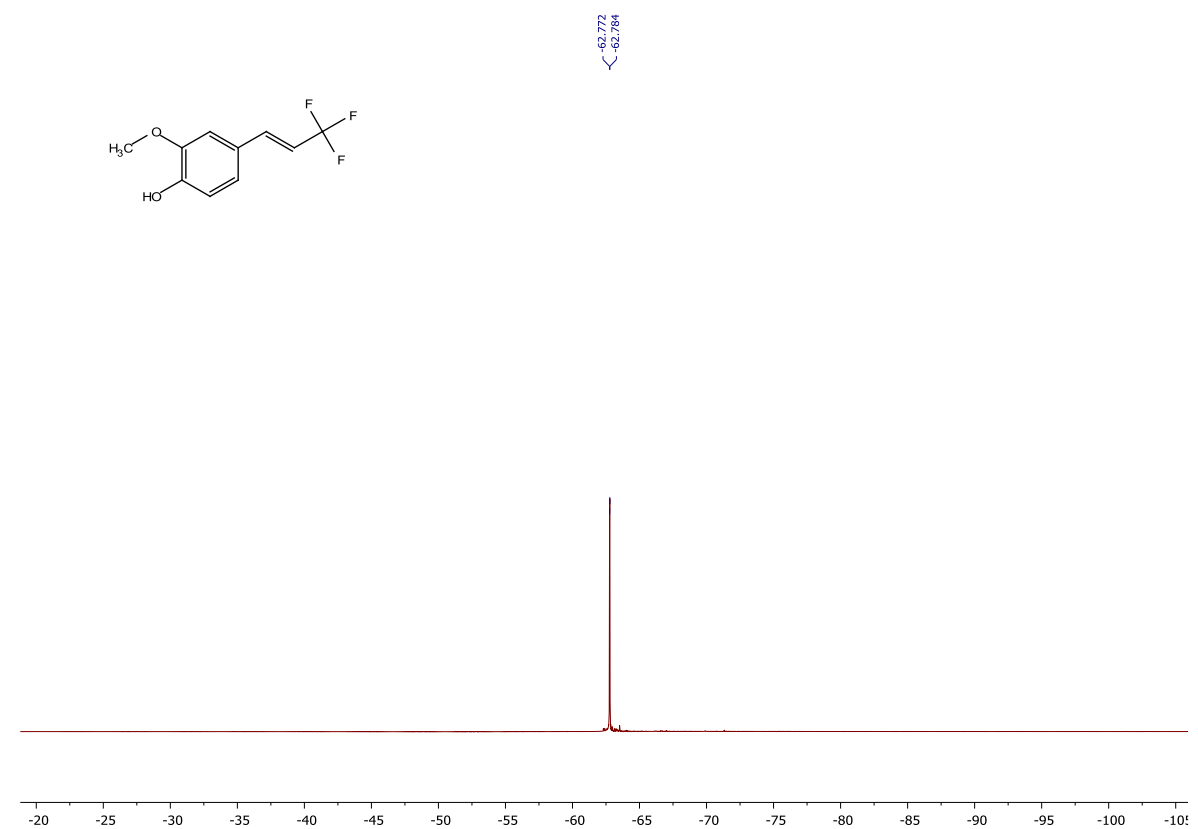

# 1,3-Dimethyl-5-(trifluoromethyl)pyrimidine-2,4(1*H*,3*H*)-dione (43)

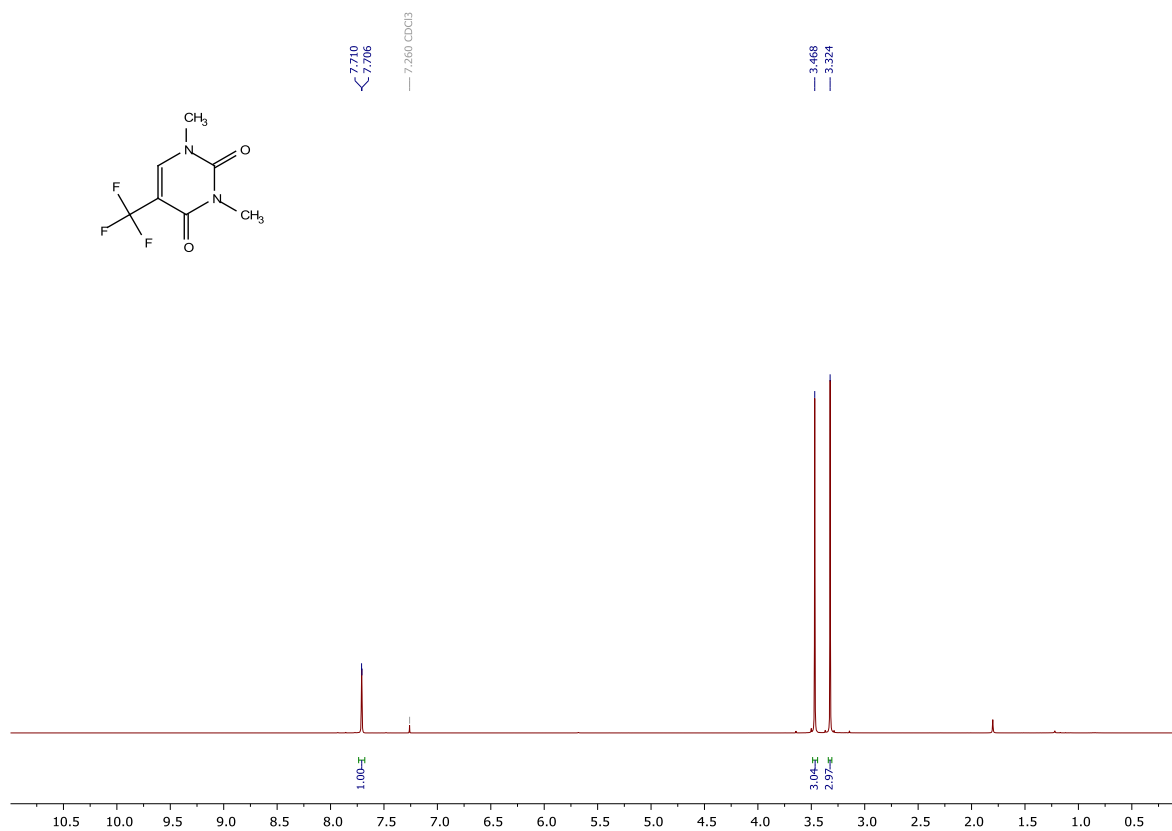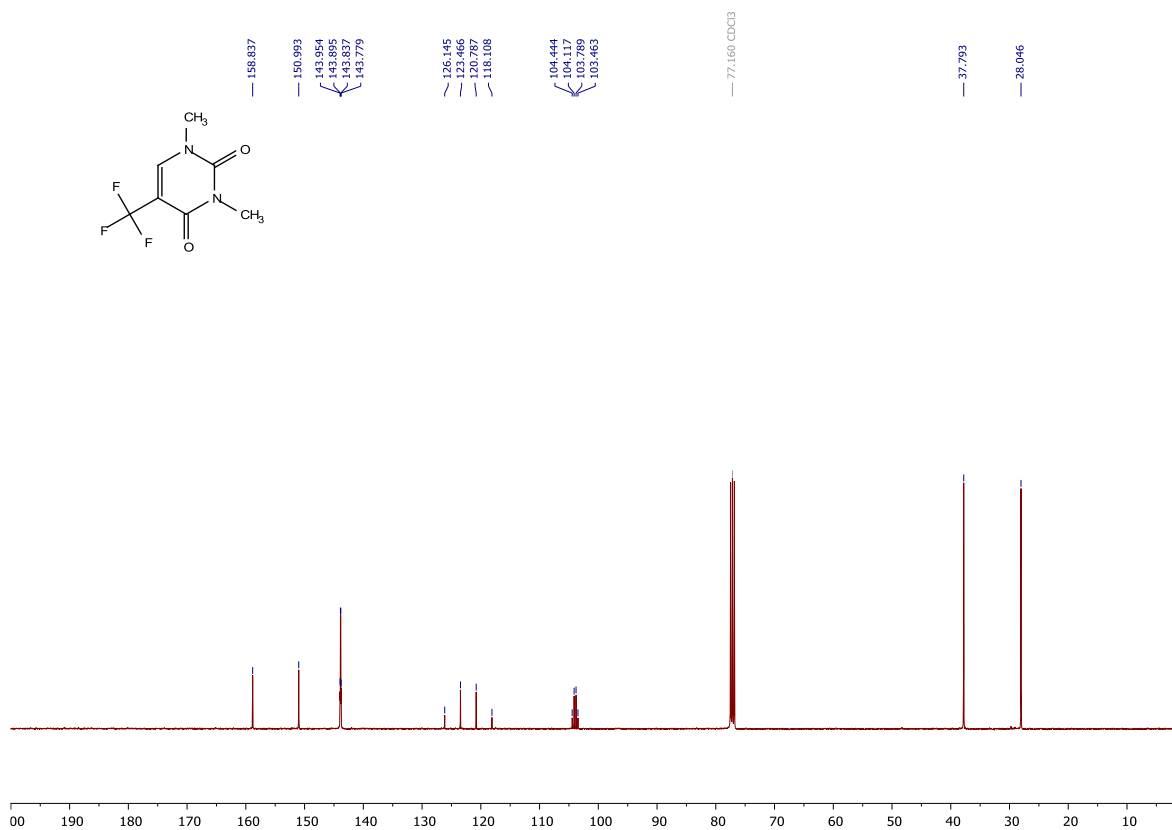

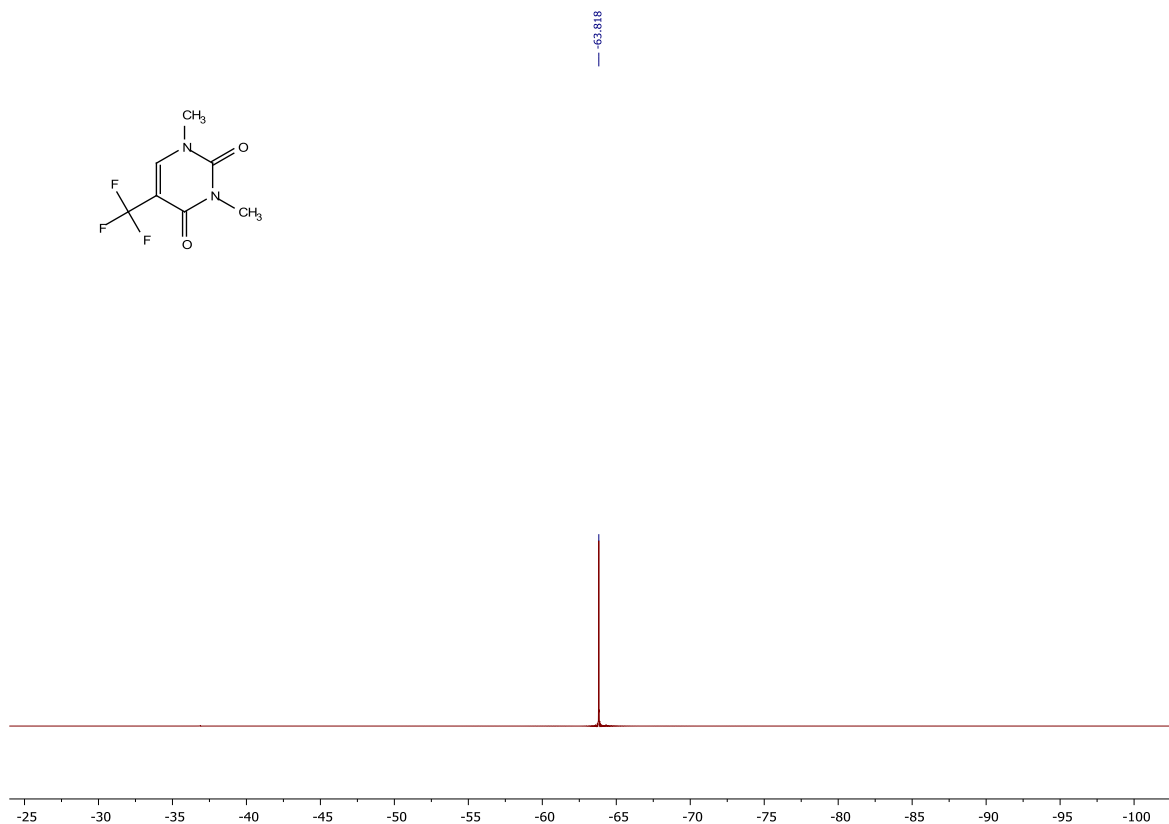

## 2-(2-(Trifluoromethyl)-1H-indol-3-yl)acetic acid (44)

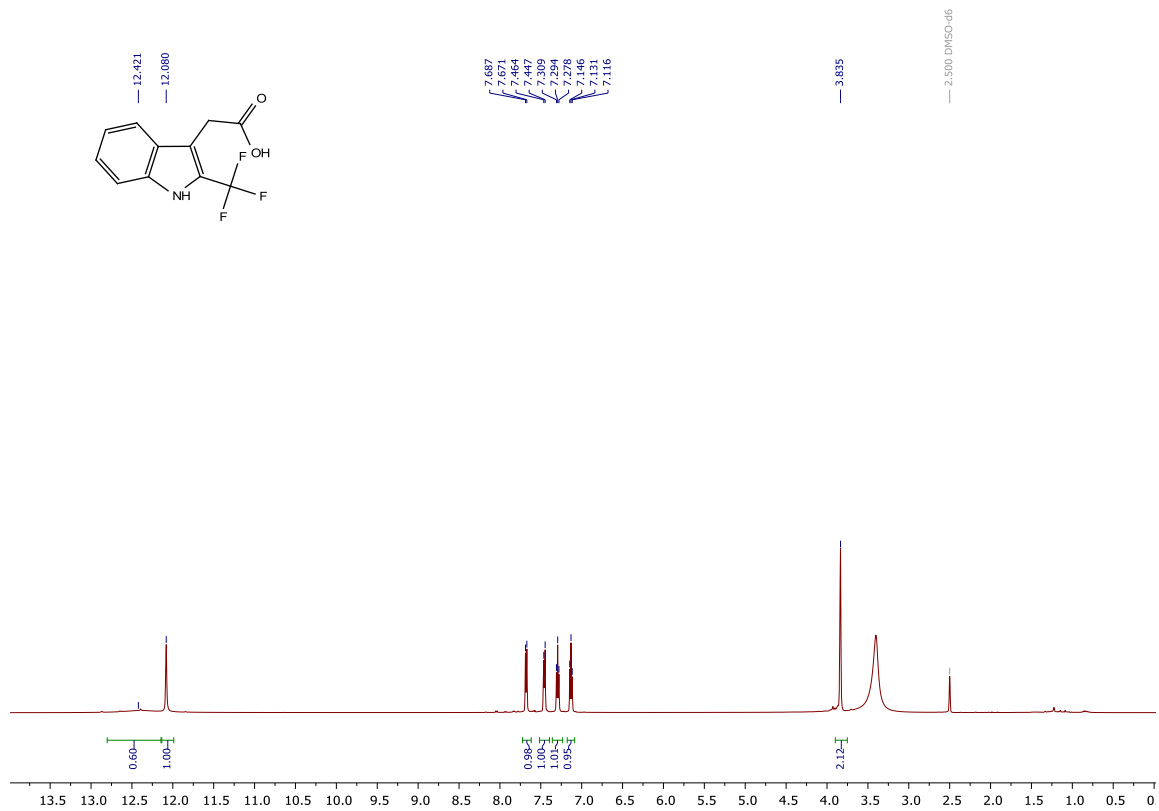

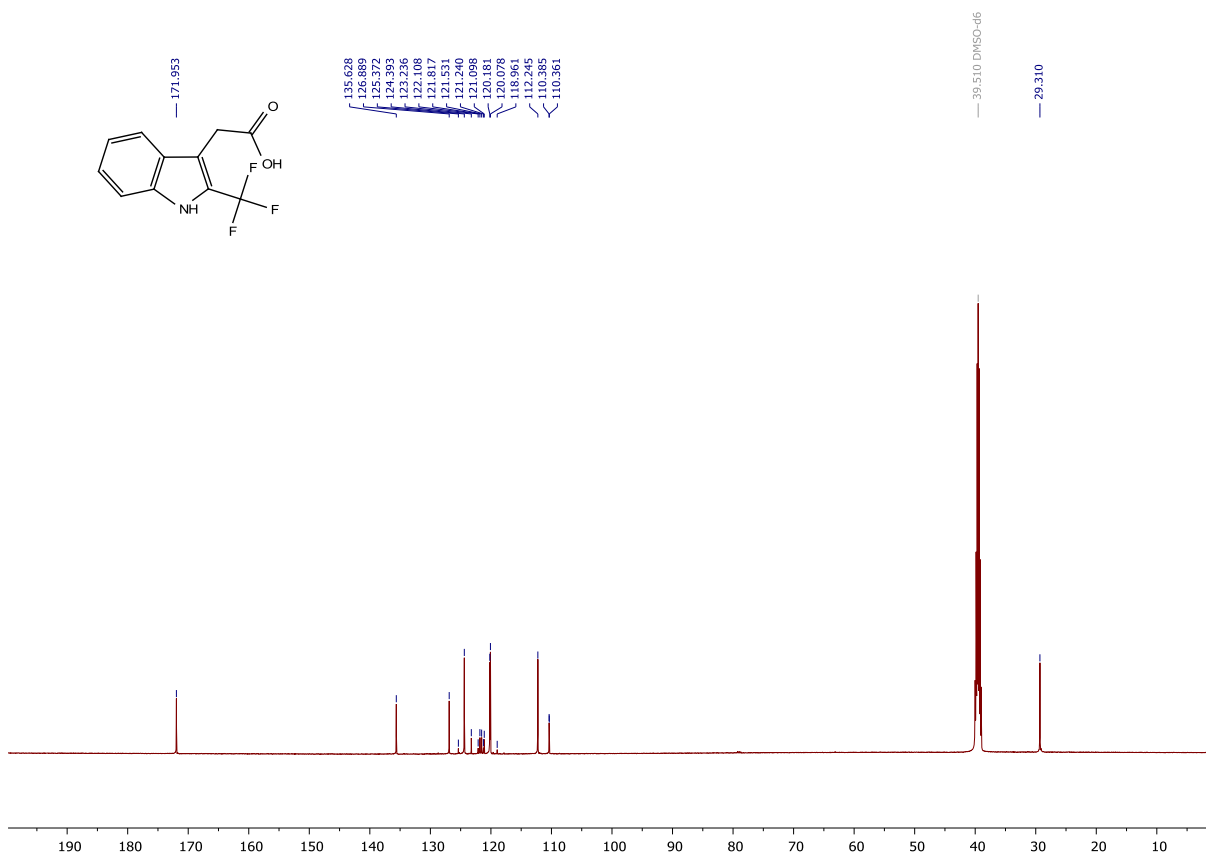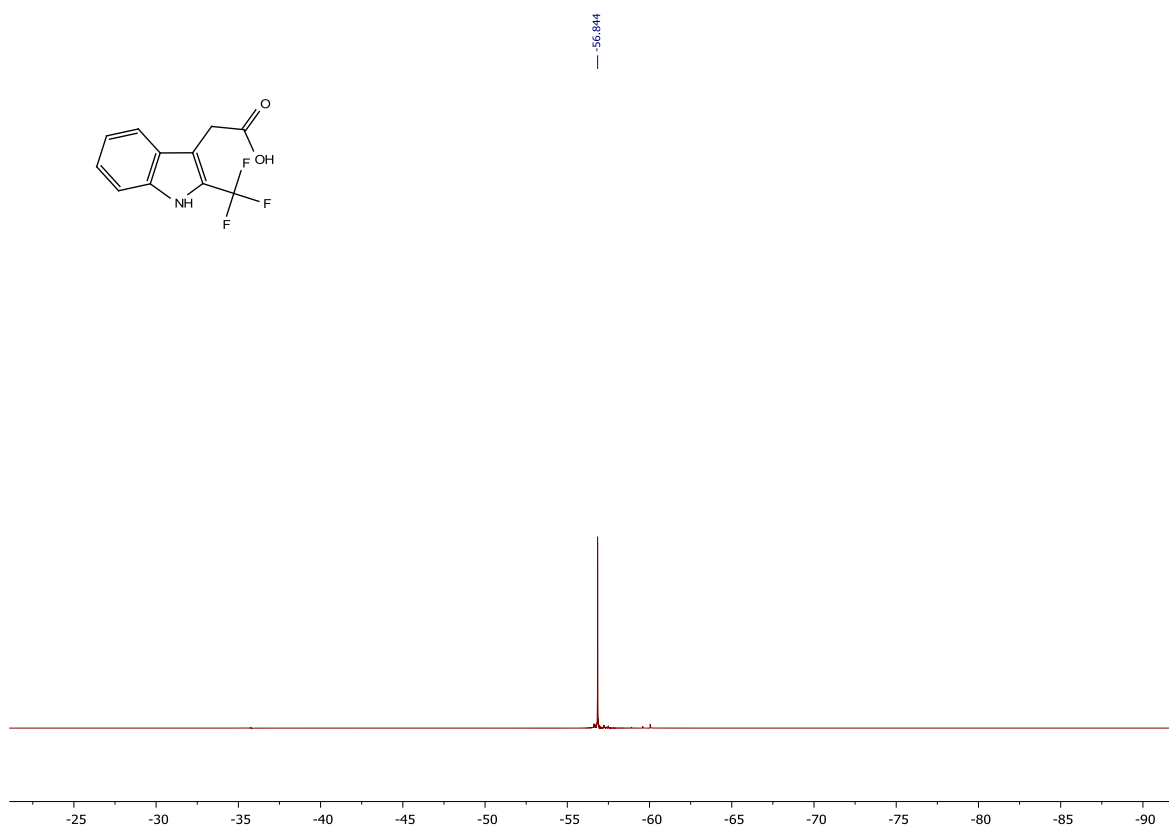

## 2-(2-(Trifluoromethyl)-1H-indol-3-yl)ethyl acetate (45)

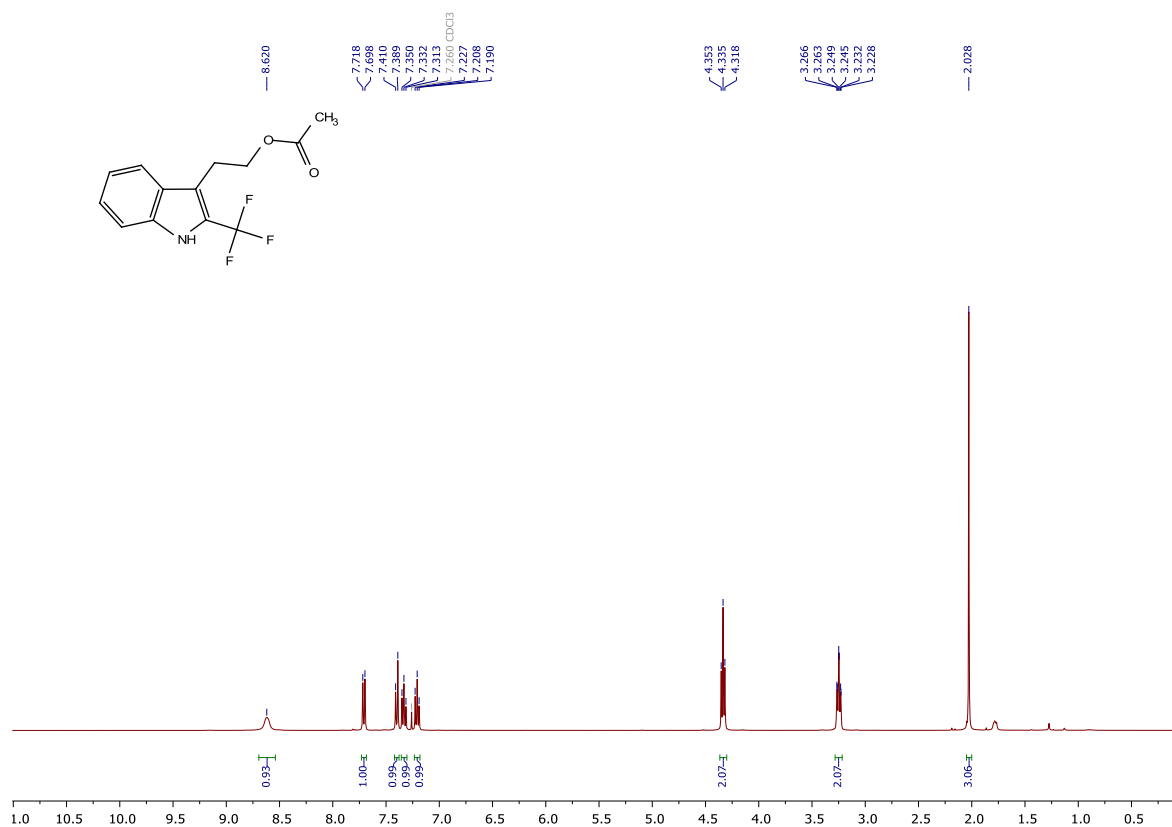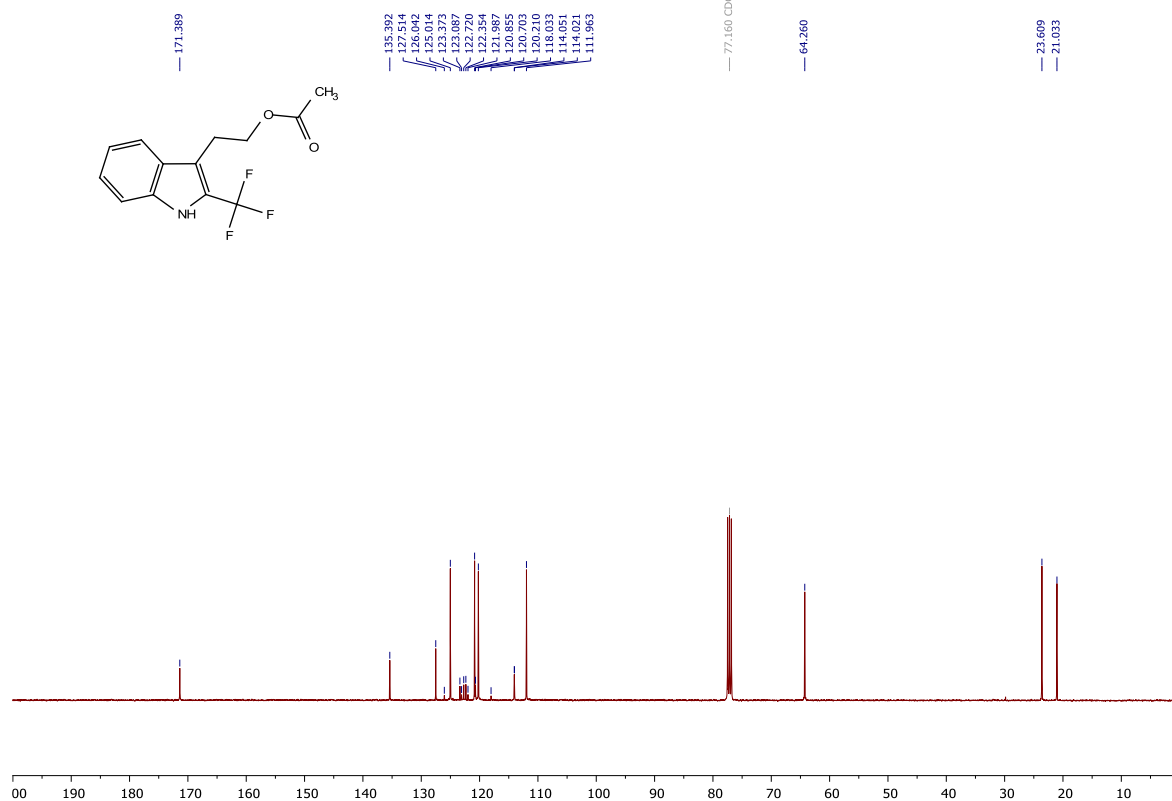



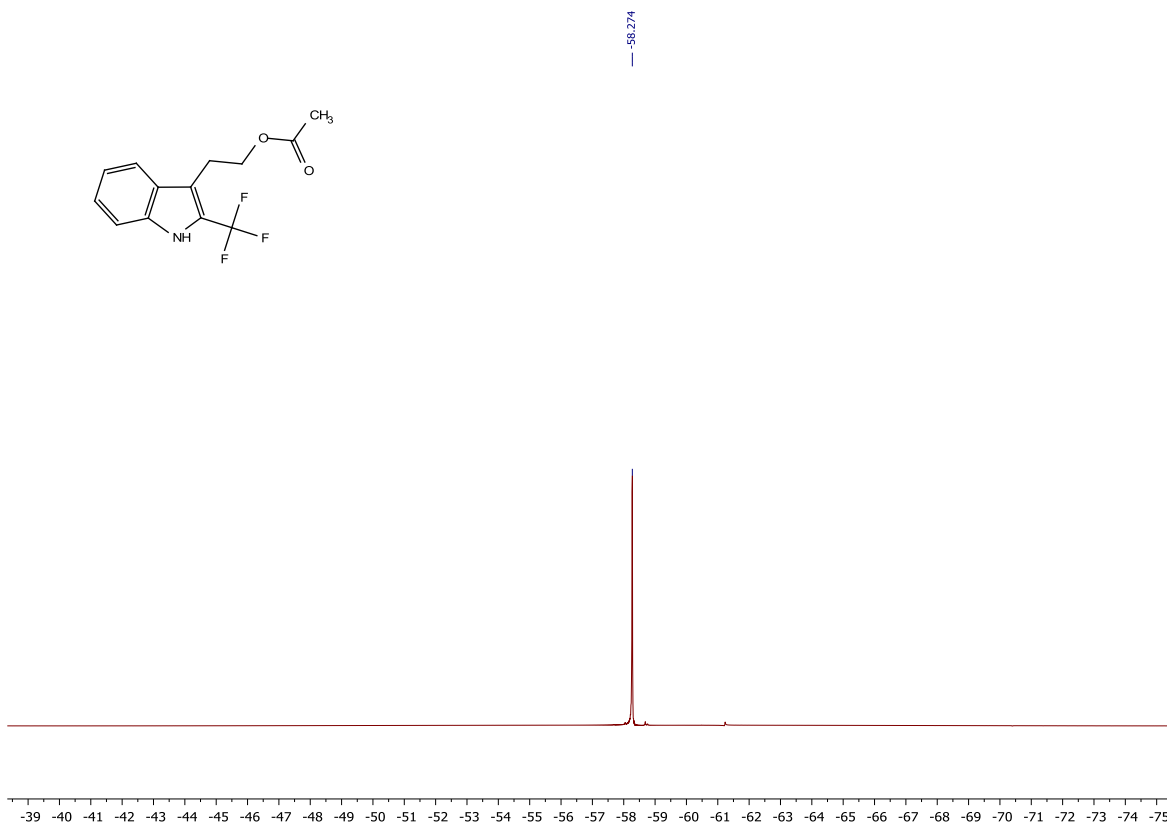

***N*-(2-(2-(Trifluoromethyl)-1*H*-indol-3-yl)ethyl)acetamide (46)**

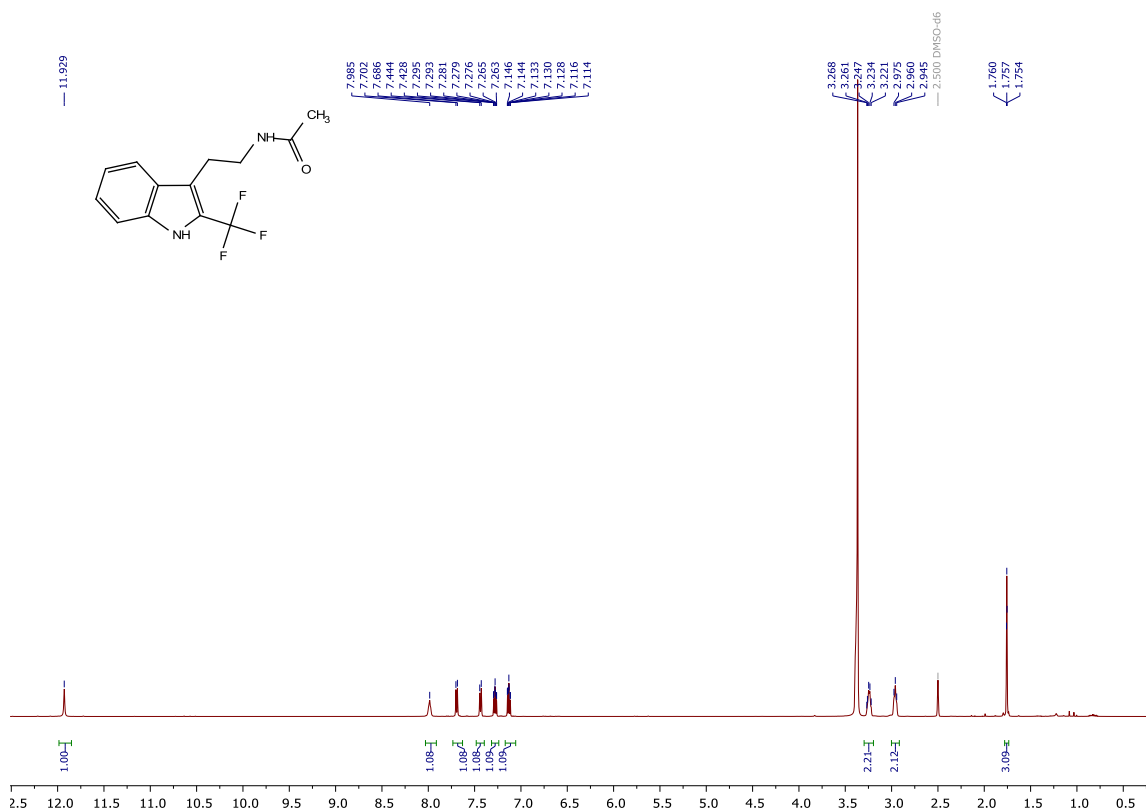

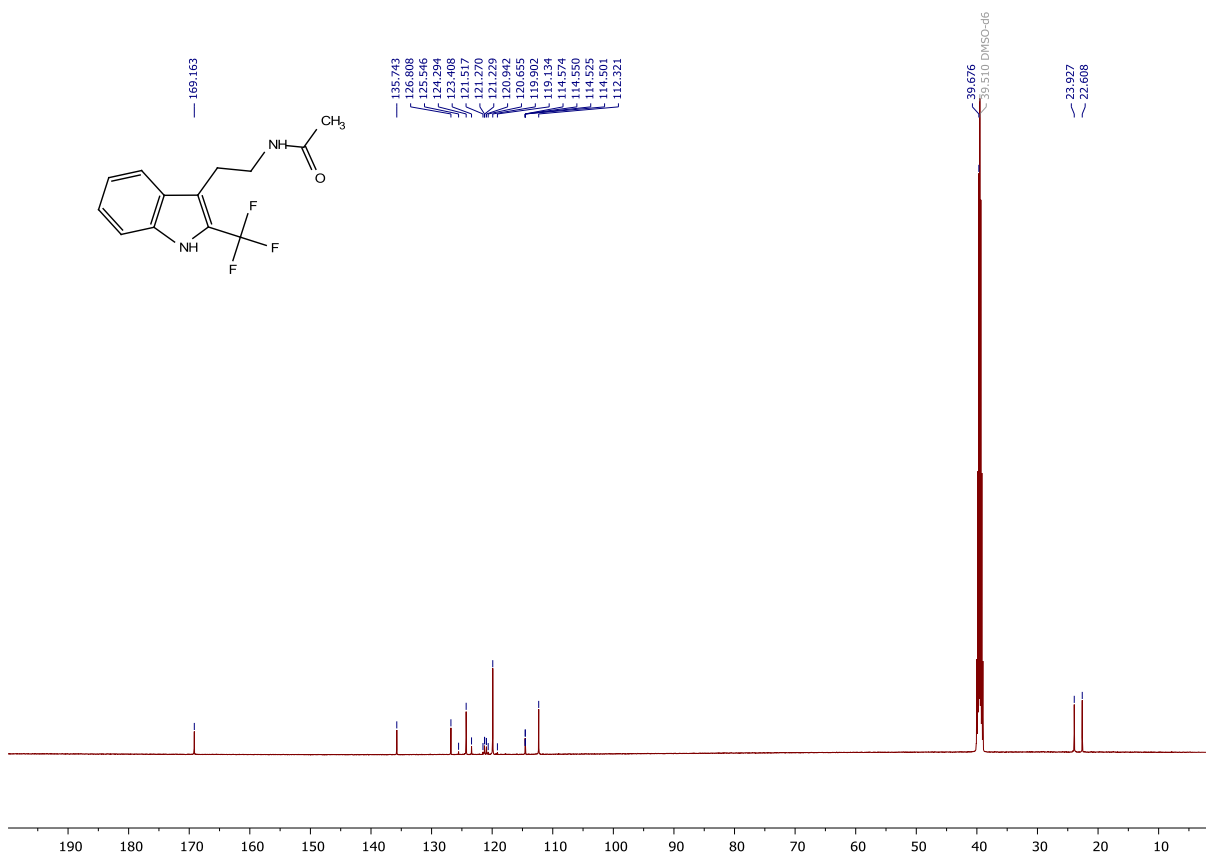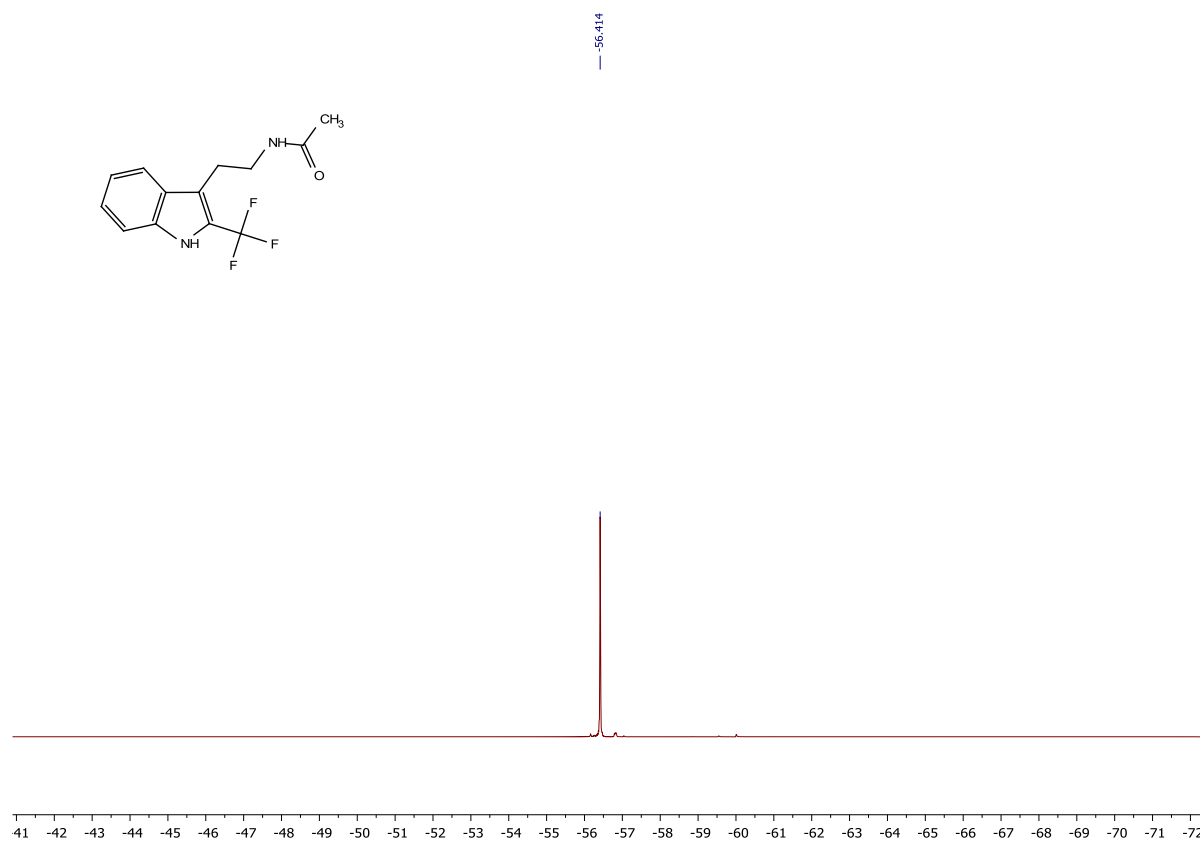

### 3-Hydroxy-4-methoxy-5-(trifluoromethyl)benzaldehyde (47)

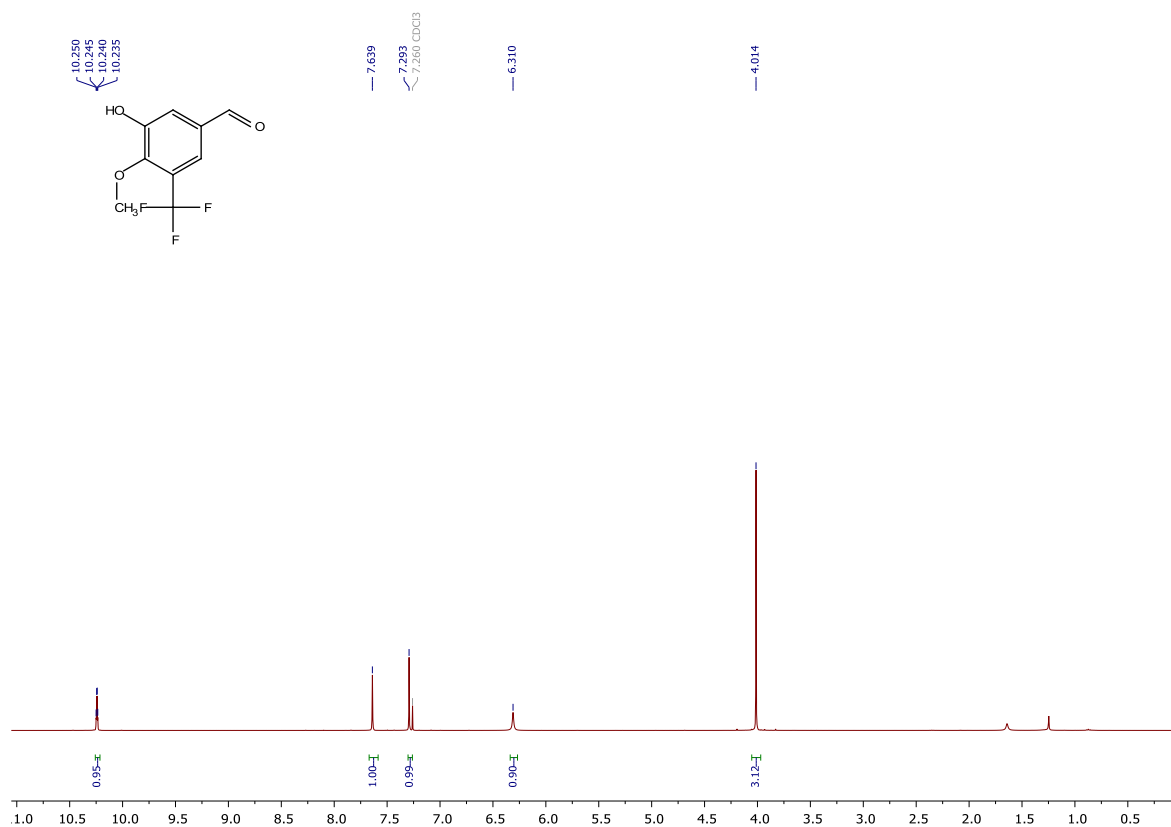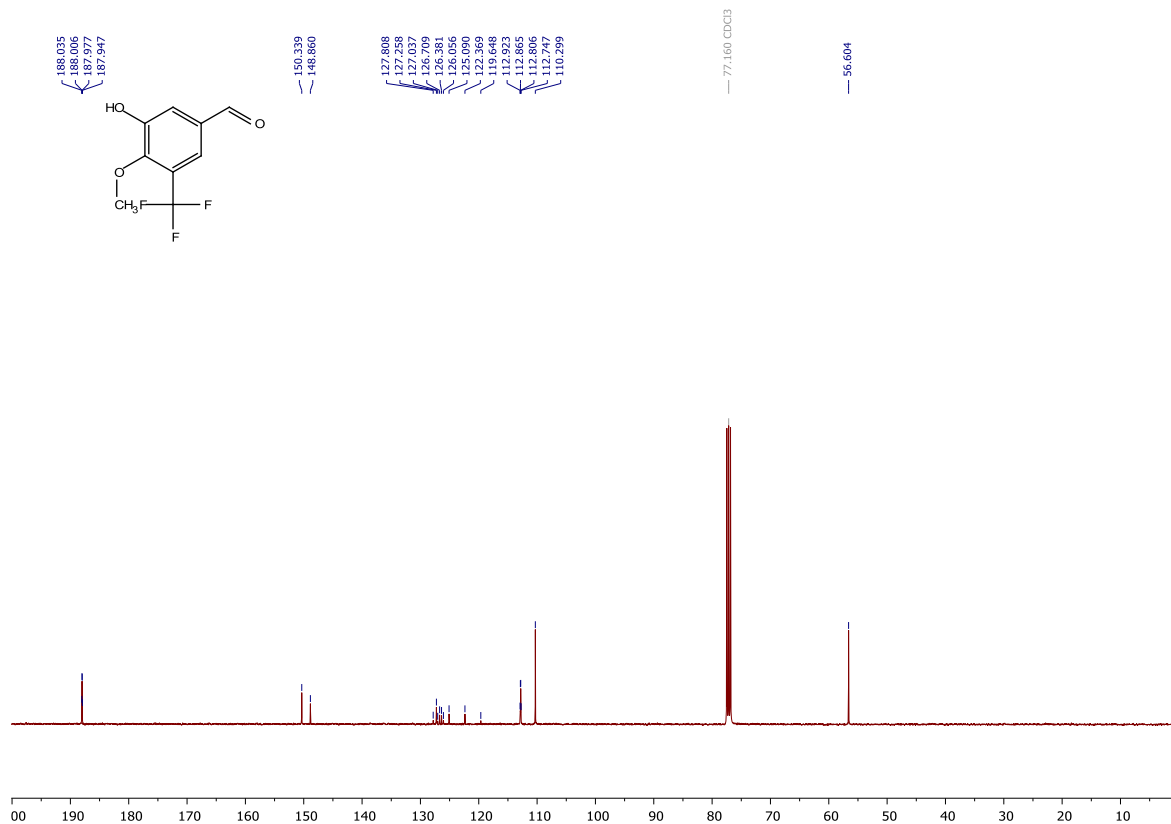

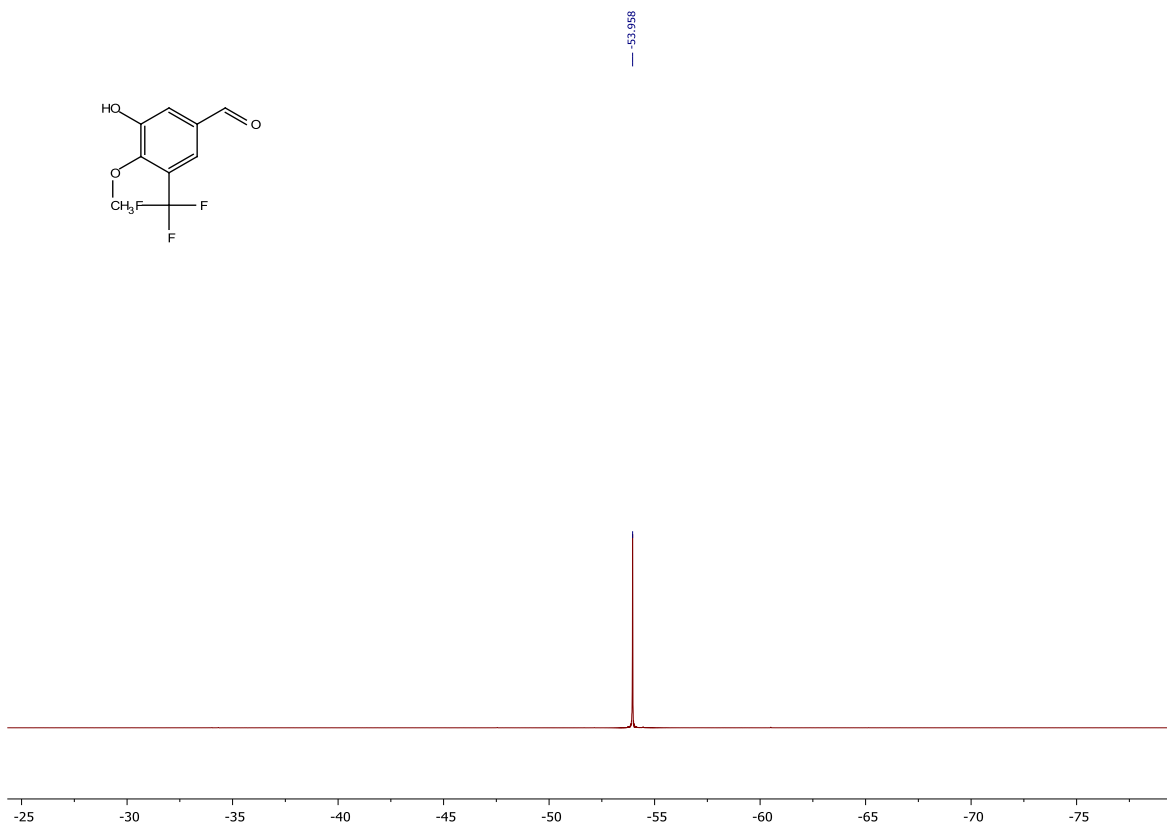

### 1,3,7-Trimethyl-8-(trifluoromethyl)-3,7-dihydro-1H-purine-2,6-dione (48)

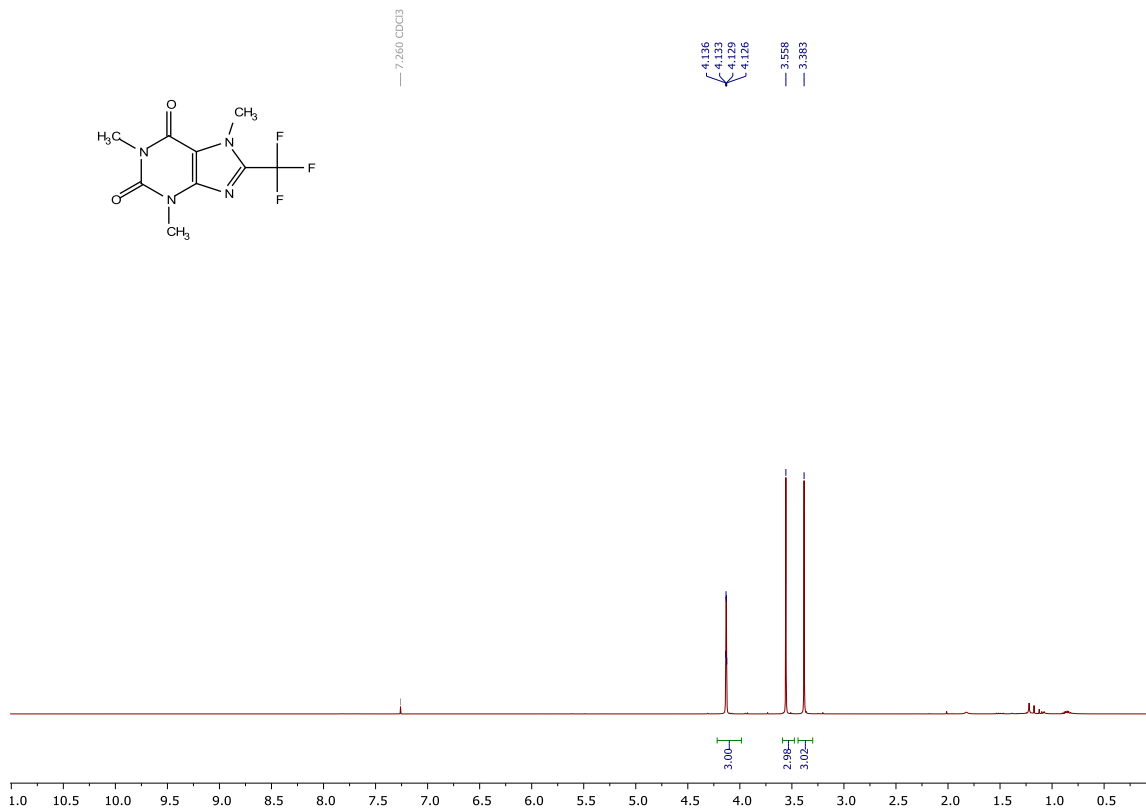

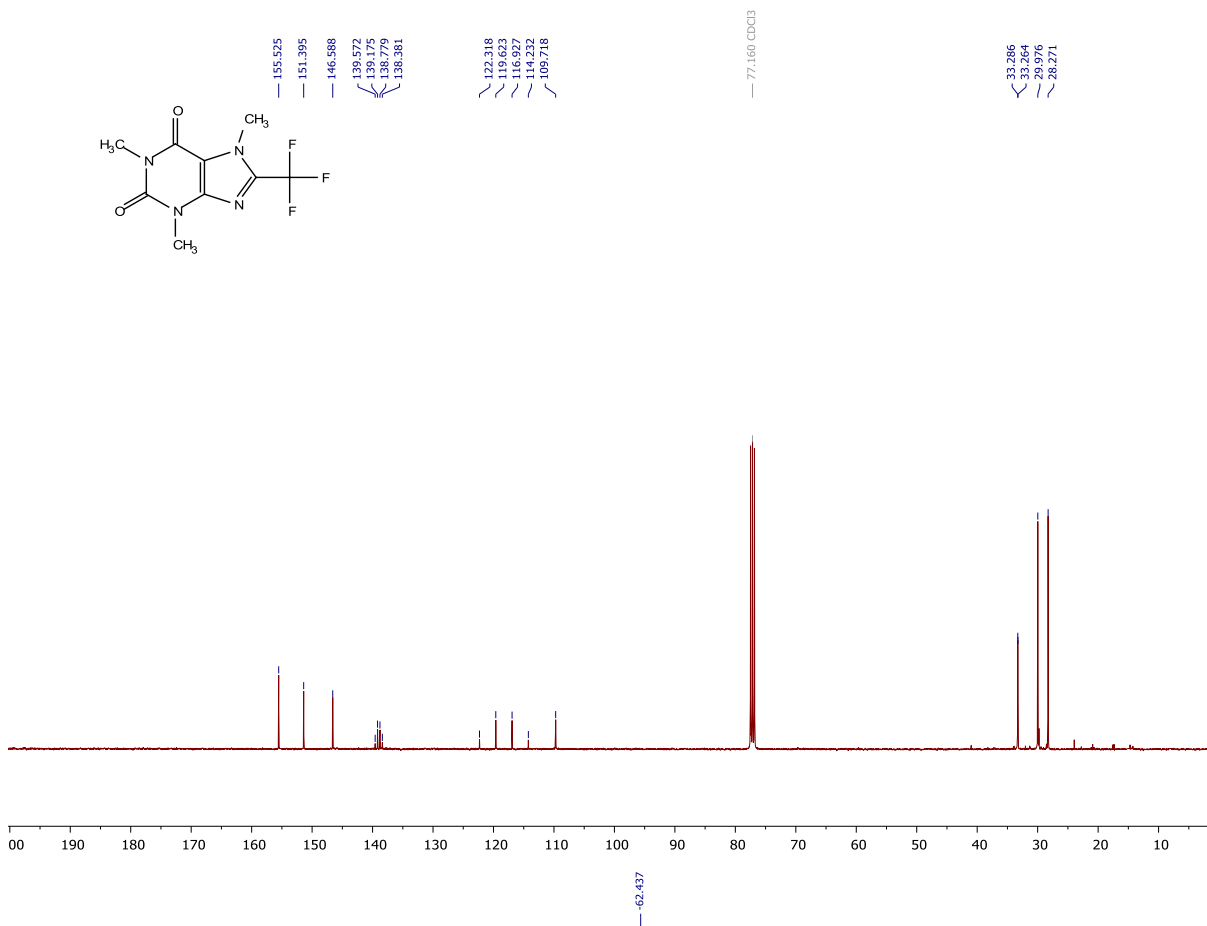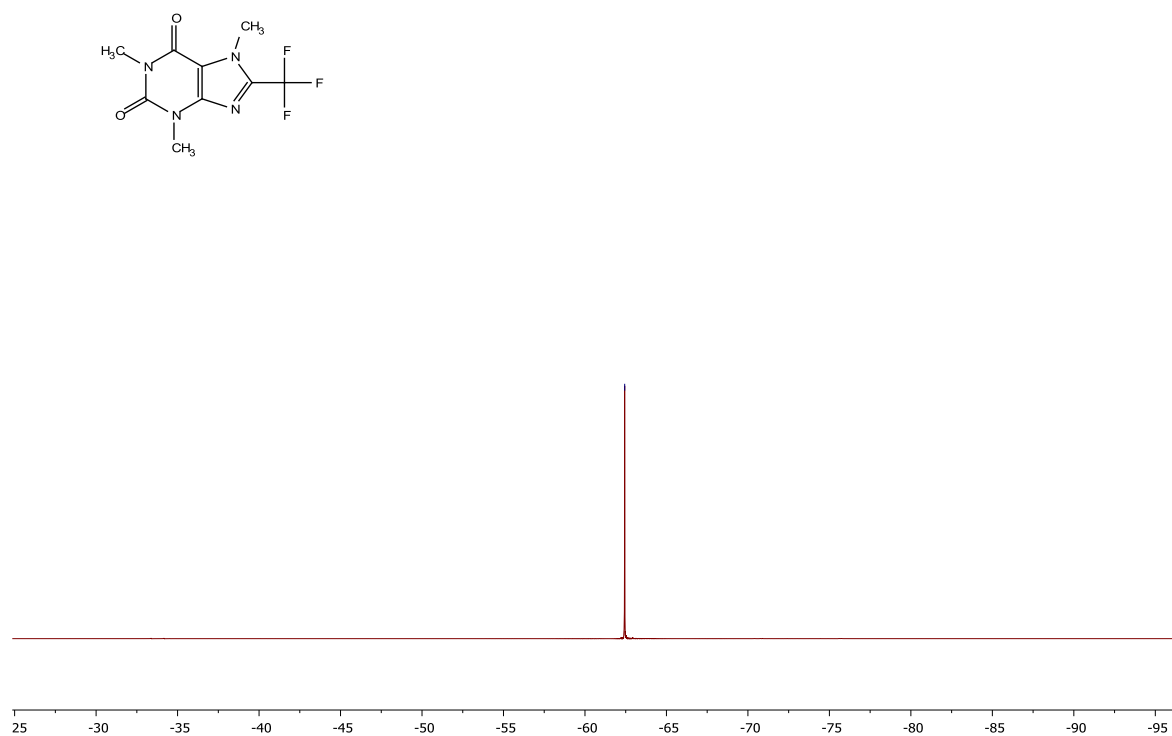

### 3,7-Dimethyl-1-(5-oxohexyl)-8-(trifluoromethyl)-3,7-dihydro-1H-purine-2,6-dione (49)

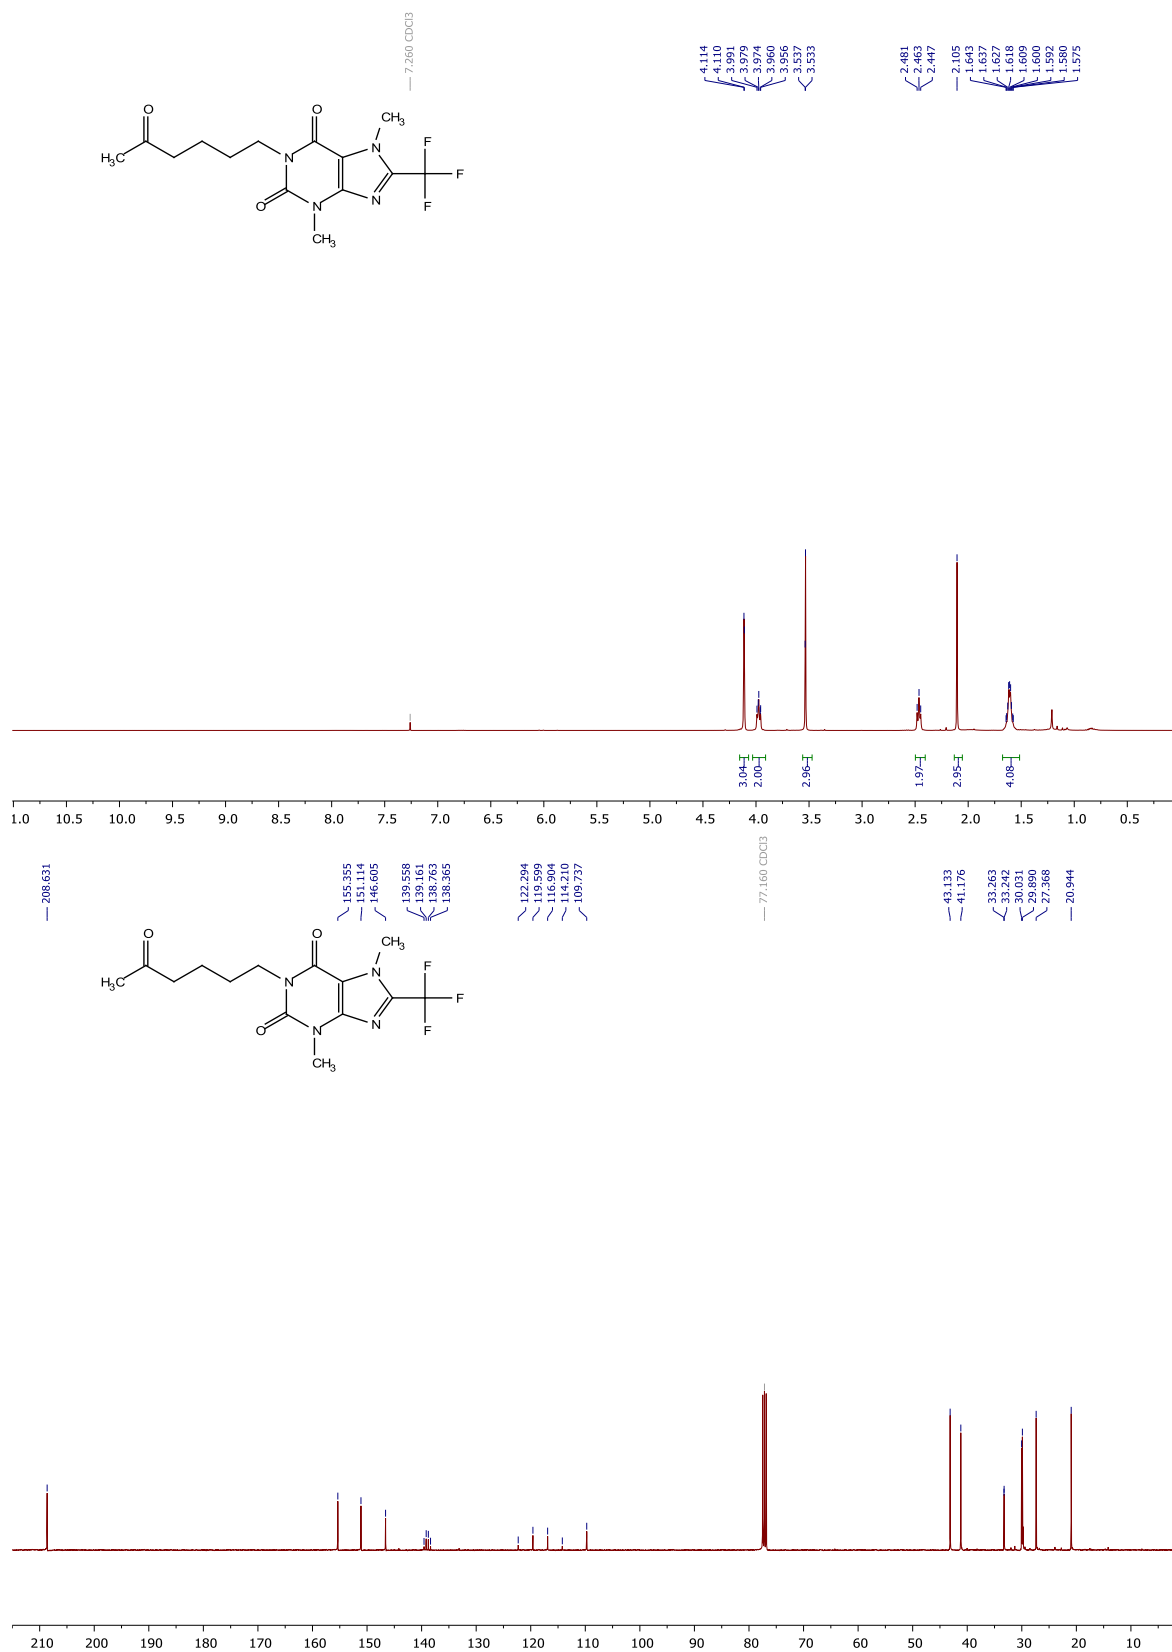

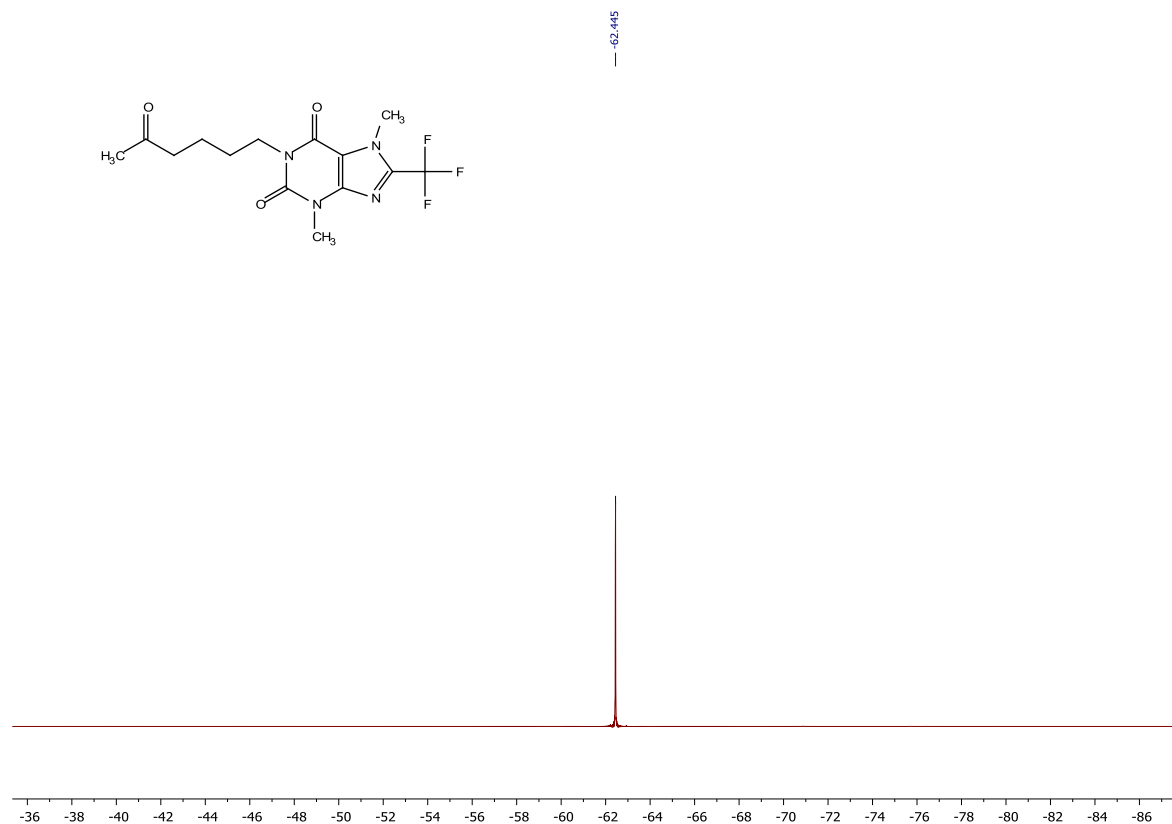

**(3,3,3-Trifluoroprop-1-ene-1,1-diyl)dibenzene**

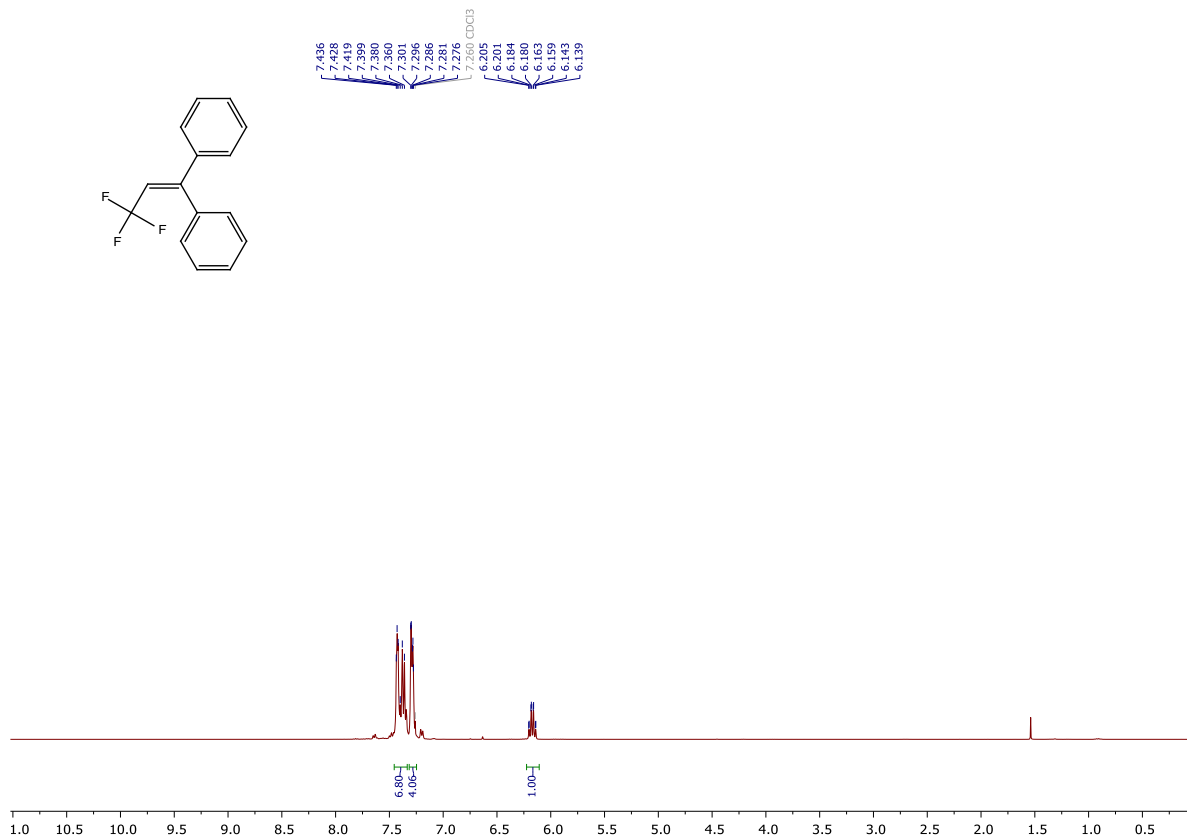

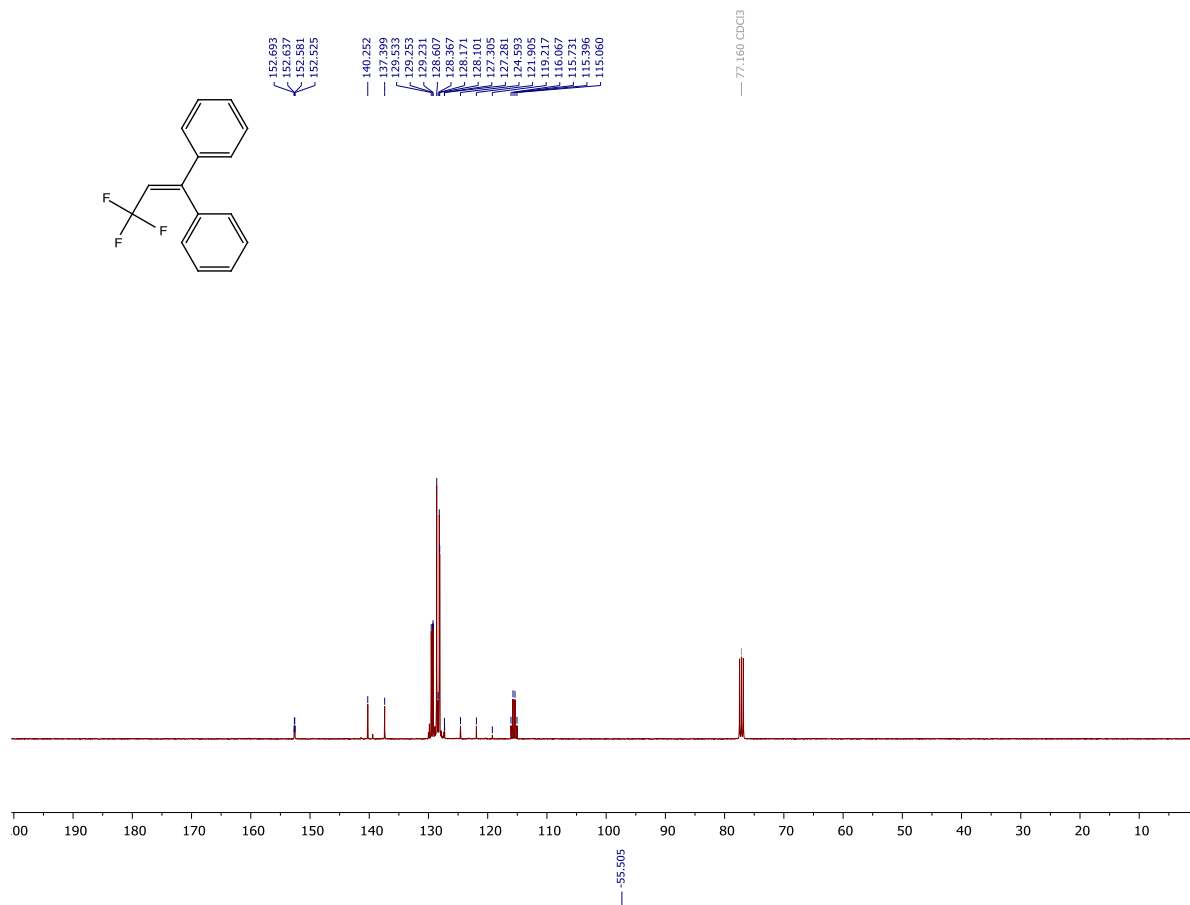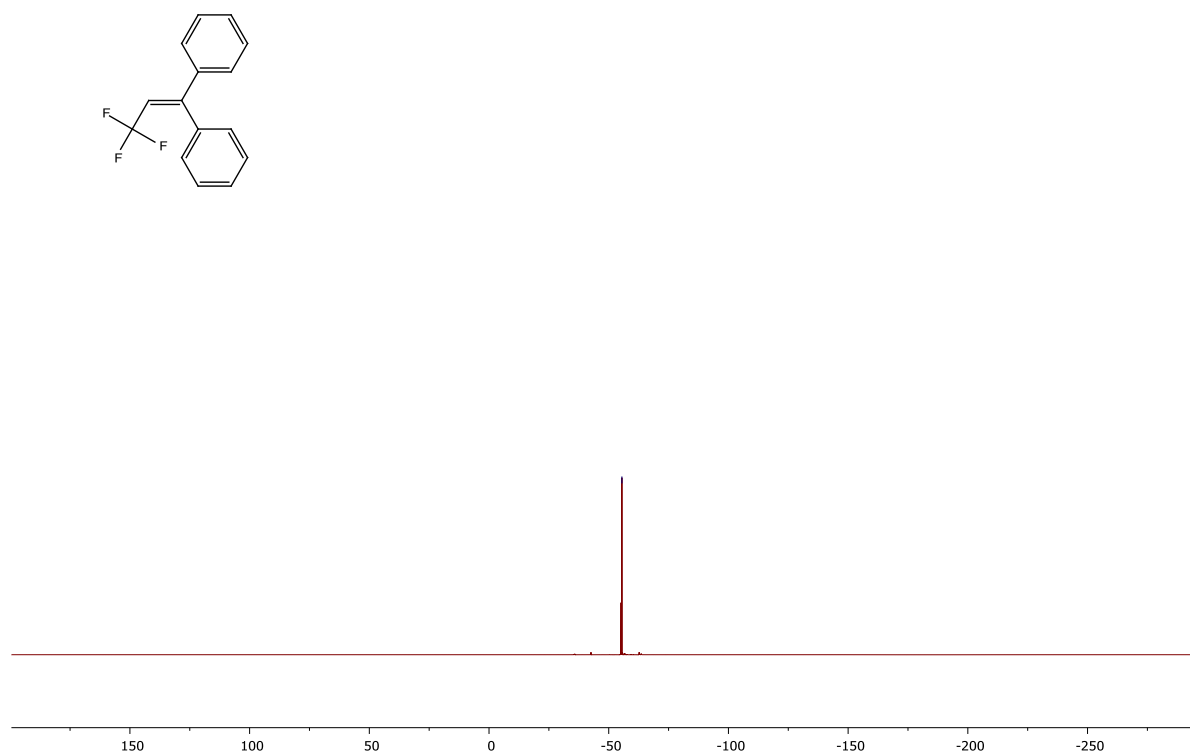

Supplement: Supplementary file 1 [file 31573158]
